# Supplementary material for: An Integrated Transcriptomic and Meta-Analysis of Hepatoma Cells Reveals Factors That Influence Susceptibility to HCV Infection
Source: PubMed Central journal article supplement (PMC3201949; doi:10.1371/journal.pone.0025584), 2011-10-25
Supplement: pone.0025584.s001.pdf [file pone.0025584.s001.pdf]

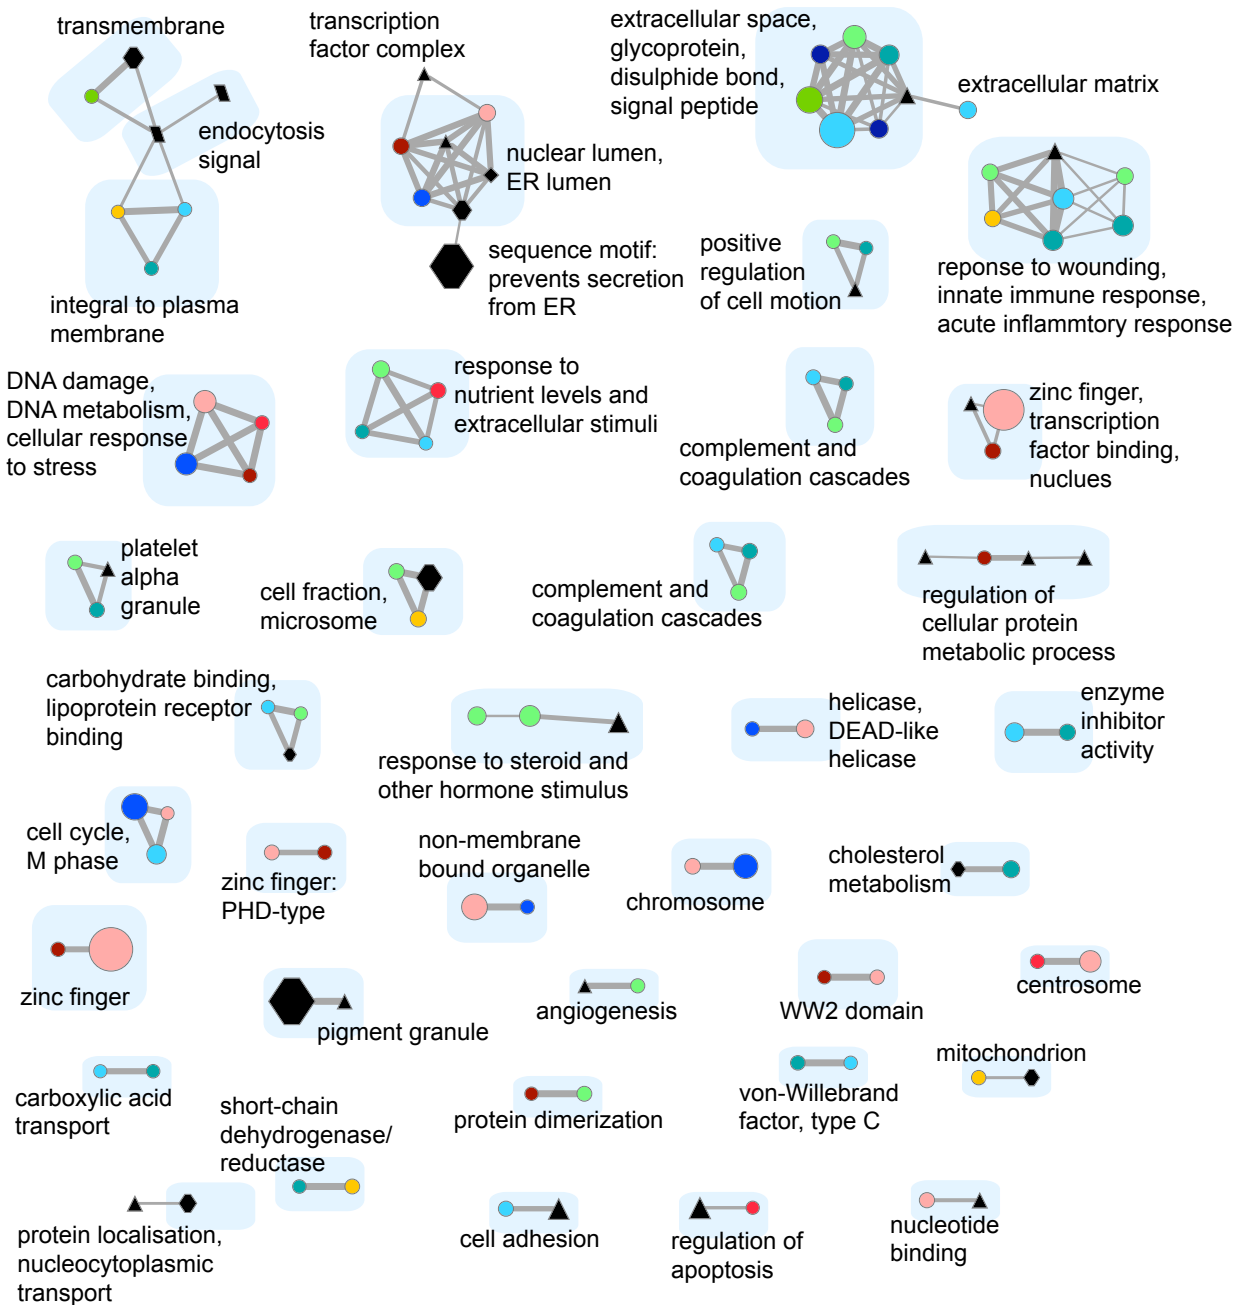

● Huh-7.5.1 -> R1.1

● Huh-7 vs. Huh-7i

◆ HRFs

● R1.1 -> R1.109

● Huh-7.5.1 vs. Huh-7.5.1\*

▲ interact with HCV protein

● R1.1 -> R1.110

● Huh-7.5.1c2 vs. Huh-7.5.1c2\*

▮ entry factors

● Huh-7.5.1 -> R2.1

● chronic infection

◆ HDFs

● Huh-7 -> Huh-7.5.1

● Huh-7.5.1 -> Huh-7.5.1c2
