# Supplementary material for: An Integrated Transcriptomic and Meta-Analysis of Hepatoma Cells Reveals Factors That Influence Susceptibility to HCV Infection
Source: PubMed Central journal article supplement (PMC3201949; doi:10.1371/journal.pone.0025584), 2011-10-25

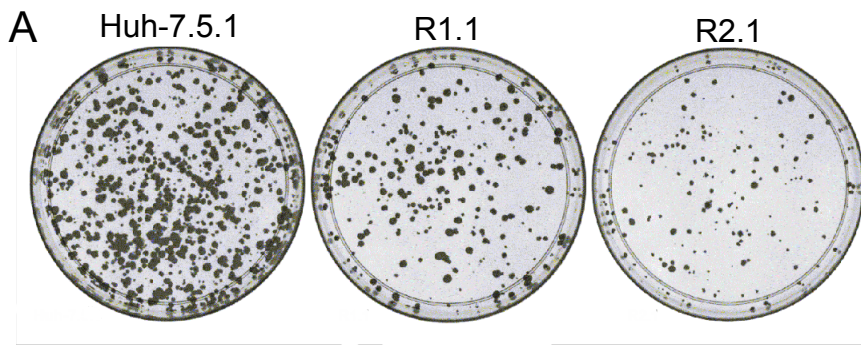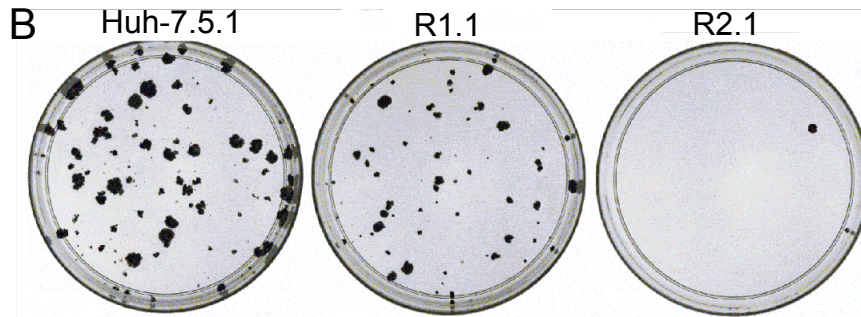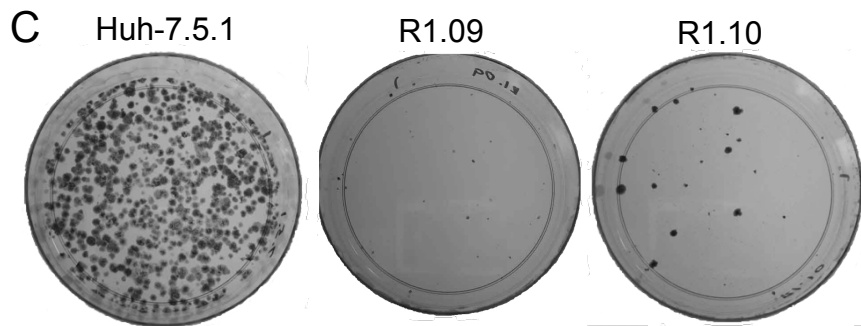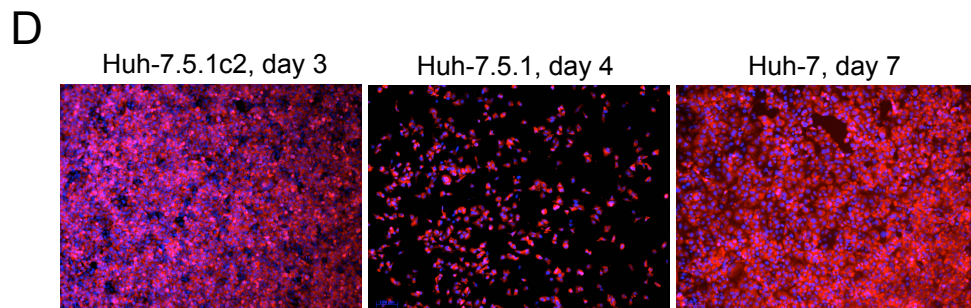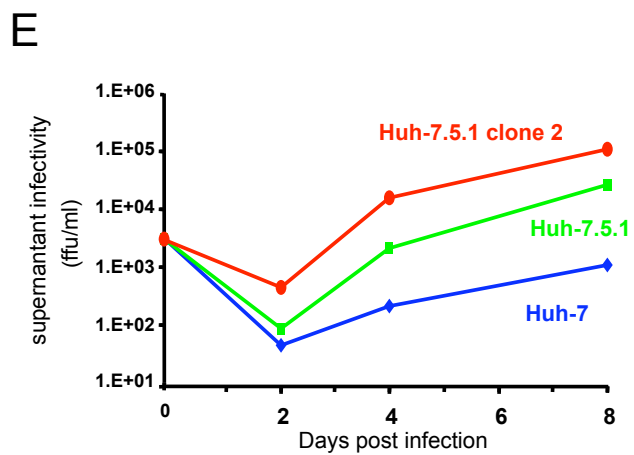

Supplement: pone.0025584.s002.pdf [file pone.0025584.s002.pdf]
