# Supplementary material for: An Integrated Transcriptomic and Meta-Analysis of Hepatoma Cells Reveals Factors That Influence Susceptibility to HCV Infection
Source: PubMed Central journal article supplement (PMC3201949; doi:10.1371/journal.pone.0025584), 2011-10-25

# PCA plot with all hepatoma cells

\*denotes a HCV infected cell

- Huh-7, exp 1, 168 hours
- Huh-7, exp 1, 20 hours
- Huh-7.5.1c2, exp 1, 96 hours
- Huh-7.5.1, exp 1, 120 hours
- Huh-7.5.1, exp 1, 20 hours
- Huh-7.5.1c2, exp 1, 20 hours
- Huh-7.5.1c2\*, exp 1, 96 hours
- Huh-7\*, exp 1, 168 hours
- Huh-7.5.1\*, exp 1, 120 hours
- Huh-7.5.1, exp 2
- ▲ R2.1, exp2
- ▲ R1.09, exp2
- ▲ R1.10, exp2

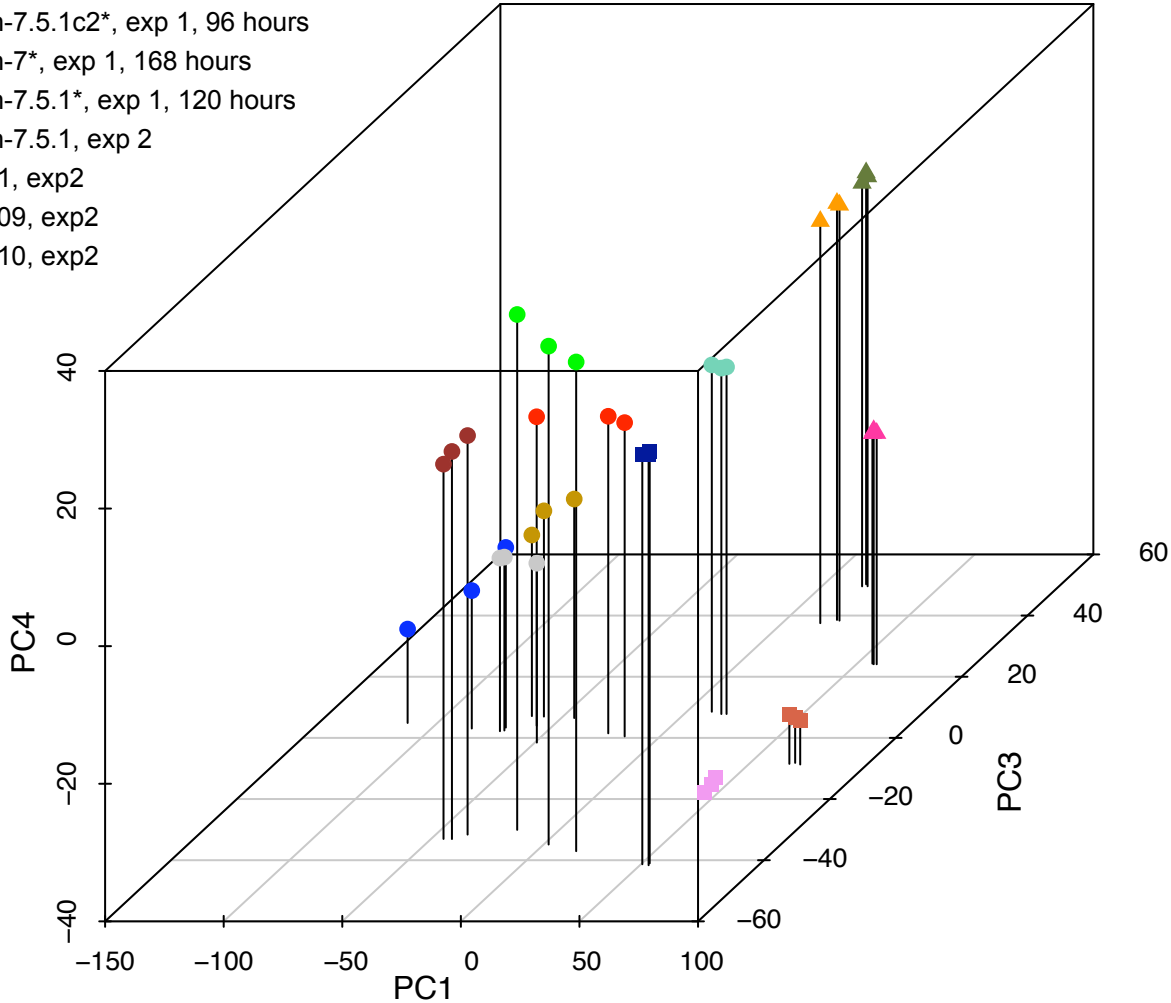

Supplement: pone.0025584.s003.pdf [file pone.0025584.s003.pdf]
