# Supplementary material for: An Integrated Transcriptomic and Meta-Analysis of Hepatoma Cells Reveals Factors That Influence Susceptibility to HCV Infection
Source: PLoS One. 2011 Oct 25;6(10):e25584. doi: 10.1371/journal.pone.0025584 (PMC3201949; doi:10.1371/journal.pone.0025584)
Supplement: Table S4 — Output from DAVID 6.7 functional annotation clustering. The first six sheets show results for gene sets that are differentially expressed on a specific branch of the tree of cells. The following three sheets show results from genes that are differentially expressed in HCV susceptible cells following infection. The remaining six sheets show results for other HCV-related data sets: HCV-linked cell receptors and lipoproteins, HRFs, HDFs, two sets of HCV-protein interacting factors (from studies [10] and [69], respectively) and genes differentially expressed during chronic HCV infection [93]. Only annotation clusters that have an enrichment score >2 are shown. Each sheet shows results from a different branch and sheets are named accordingly. (XLS) [file pone.0025584.s007.xls]

## Sheet: Huh-7 to Huh-7.5.1
Annotation Cluster 1	Enrichment Score: 5.808945576315795
Category	Term	Count	%	PValue	Genes	List Total	Pop Hits	Pop Total	Fold Enrichment	Bonferroni	Benjamini	FDR
GOTERM_CC_FAT	GO:0005615~extracellular space	111	5.45991	1.36511e-08	10344,5167,2147,1191,255738,9244,8744,283,23467,10924,6866,3484,3485,5444,2152,2200,5446,1280,4036,5175,9353,5646,3489,6291,55959,7941,5649,5648,1906,27329,2,1513,7412,6364,3549,23452,4693,7079,1278,93099,4838,732,2267,2266,3026,3949,727,6372,3416,7045,4015,7044,100,5154,53342,55937,8754,9235,5340,6388,717,718,7057,27293,2821,3240,2810,2919,3827,197,7127,9388,3383,54097,2192,2244,123920,3576,3250…	1417	412	8798	1.67278	8.29984e-06	8.29984e-06	2.01982e-05
GOTERM_CC_FAT	GO:0044421~extracellular region part	140	6.88637	2.53411e-07	10344,5167,2147,1191,255738,9244,8744,283,23467,10924,7060,3484,6866,3485,2152,5444,2200,5446,1280,4036,5175,9353,5646,3489,255743,6291,55959,5649,7481,7941,5648,1906,27329,2,1513,7412,3549,6364,23452,2331,1490,7076,3911,7079,4693,1278,93099,4838,732,2267,2266,3898,6678,3026,3949,727,6372,83716,3416,7045,7044,100,4015,53342,5154,55937,8754,9235,5340,6388,717,718,2821,27293,7057,4148,4147,3240,281…	1417	580	8798	1.4987	0.000154062	7.70338e-05	0.000374946
SP_PIR_KEYWORDS	signal	360	17.7078	2.81834e-07	10344,1191,23654,51083,7060,8321,3482,3484,6866,8324,3485,8325,54495,11098,7162,339479,64881,2200,54894,8875,8029,5646,5360,3489,1081,79713,55959,23266,7481,5649,4885,5648,51365,929,2,8728,6364,3491,2331,1490,84894,7076,3911,84892,7079,23129,2213,732,3597,214,1075,130576,130574,924,78987,12,25907,3949,81562,727,121506,5348,175,725,6372,722,83716,7048,143888,7045,7044,375056,55739,55937,915,5627,5…	1997	1886	13223	1.2639	0.000204873	0.000204873	0.000427175
UP_SEQ_FEATURE	signal peptide	360	17.7078	3.36888e-07	10344,1191,23654,51083,7060,8321,3482,3484,6866,8324,3485,8325,54495,11098,7162,339479,64881,2200,54894,8875,8029,5646,5360,3489,1081,79713,55959,23266,7481,5649,4885,5648,51365,929,2,8728,6364,3491,2331,1490,84894,7076,3911,84892,7079,23129,2213,732,3597,214,1075,130576,130574,924,78987,12,25907,3949,81562,727,121506,5348,175,725,6372,722,83716,7048,143888,7045,7044,375056,55739,55937,915,5627,5…	1997	1886	13210	1.26266	0.00153369	0.00153369	0.000634839
SP_PIR_KEYWORDS	glycoprotein	443	21.7905	5.57876e-07	23654,5376,152,8321,3482,8324,3485,8325,63917,11098,339479,2852,2200,8870,2013,8875,8029,5360,3489,10098,55959,27075,7481,51365,929,2,8728,7345,84894,84892,90139,2213,732,6752,3597,6751,214,130576,928,57228,130574,924,78987,138050,727,175,725,722,143888,6476,254531,5244,51280,55937,915,189,8754,29015,5340,717,182,718,185,6385,6480,85450,85455,27293,3240,3384,3385,27163,3383,9200,432,2244,8645,299…	1997	2402	13223	1.22119	0.000405494	0.000202767	0.00084557
UP_SEQ_FEATURE	glycosylation site:N-linked (GlcNAc...)	421	20.7083	9.96146e-07	23654,5376,152,8321,3482,8324,8325,63917,11098,339479,2852,2200,8870,2013,8875,8029,5360,10098,55959,27075,7481,51365,2,929,8728,84894,84892,90139,2213,732,6752,3597,6751,214,928,130574,924,78987,138050,727,175,725,722,143888,6476,254531,5244,51280,55937,915,8754,29015,5340,717,182,718,185,6480,85450,85455,27293,3240,3384,3385,27163,3383,9200,432,2244,8645,29953,3105,50848,3250,27035,64430,29940,…	1997	2276	13210	1.22359	0.00452816	0.00226665	0.00187715
SP_PIR_KEYWORDS	Secreted	190	9.34579	7.16722e-06	10344,2147,1191,255738,6019,9244,25966,283,51083,10924,79887,81533,3484,6866,3485,11098,4828,5444,339479,4922,2200,1280,5446,9353,5646,7286,5360,3489,1081,255743,4192,6291,4885,7481,5649,7941,51232,5648,1906,79154,51365,27329,2,3549,6364,3491,23452,2331,1490,283869,7076,3911,7079,4693,116349,1278,93099,4838,6690,732,2267,2266,3898,130574,6678,3026,12,727,725,6372,722,83716,7045,7044,4015,83690,83…	1997	935	13223	1.34553	0.00519704	0.00173536	0.0108628
GOTERM_CC_FAT	GO:0005576~extracellular region	230	11.3133	1.98986e-05	10344,1191,8744,51083,7060,3484,6866,3485,11098,339479,2200,5646,3489,5360,1081,55959,7481,5649,4885,5648,51365,929,2,6364,3491,2331,1490,7076,3911,7079,732,2316,130574,12,3949,727,725,6372,722,83716,7045,7044,10590,55937,5627,5624,8754,5340,717,6388,718,182,6480,83729,7057,2821,27293,5919,4148,3240,4147,3827,4753,3383,54097,2244,87,3250,5118,302,78991,140862,304,57493,84947,10437,3956,54757,8455…	1417	1119	8798	1.27618	0.0120256	0.0040247	0.029438
SP_PIR_KEYWORDS	disulfide bond	275	13.5268	4.37723e-05	10344,1191,170384,152,7060,8321,3482,3484,8324,3485,8325,54495,63917,11098,2852,2200,5646,8029,5360,3489,1081,5649,4885,23266,5648,51365,929,2,8728,6364,3491,4122,4121,2331,1490,84894,10724,7076,3911,7079,203328,2213,732,6752,3597,6751,84299,19,214,1075,928,13,924,78987,3949,81562,727,175,725,6372,722,83716,7048,7045,6476,7044,55937,915,5627,5624,8754,5340,717,718,182,23284,185,2588,6480,83729,70…	1997	1468	13223	1.24039	0.0313221	0.00792422	0.0663251
UP_SEQ_FEATURE	disulfide bond	262	12.8874	7.1423e-05	10344,1191,170384,152,7060,8321,3482,3484,8324,3485,8325,54495,63917,11098,2852,2200,5646,8029,5360,3489,1081,5649,4885,23266,5648,51365,929,2,8728,6364,3491,4121,2331,1490,84894,10724,7076,3911,7079,203328,2213,732,6752,3597,6751,84299,19,214,1075,13,924,78987,3949,81562,727,175,725,6372,722,83716,7048,7045,6476,7044,55937,915,5627,5624,8754,5340,717,718,182,23284,185,6480,83729,7057,4148,3240,4…	1997	1398	13210	1.23971	0.277772	0.102796	0.134506
Annotation Cluster 2	Enrichment Score: 4.9349283890243
Category	Term	Count	%	PValue	Genes	List Total	Pop Hits	Pop Total	Fold Enrichment	Bonferroni	Benjamini	FDR
GOTERM_BP_FAT	GO:0009725~response to hormone stimulus	78	3.83669	2.08667e-06	5167,3148,6464,5577,10401,255738,35,10580,197,283,51083,3484,3485,3880,2203,1827,7033,3291,5321,26524,1036,1081,207,7031,2805,133522,2,3549,10724,5936,7079,5786,5594,133,2625,1373,5105,762,5970,2628,217,6790,1843,2791,3949,6906,2274,10081,55970,7048,9021,8893,2026,2170,4015,6476,595,3570,5154,890,5244,598,8850,2308,5156,858,2690,189,857,8660,8754,5468,6898,3162,5337,5770,4144,7057	1484	301	9658	1.68648	0.00838438	0.00838438	0.00388133
GOTERM_BP_FAT	GO:0048545~response to steroid hormone stimulus	47	2.31185	3.99036e-06	133,3148,2625,1373,5970,762,35,217,51083,6790,1843,3949,6906,3485,3880,10081,9021,7048,2026,1827,6476,4015,595,3570,5154,3291,5244,890,5156,5321,858,2690,189,1036,857,8754,5468,7031,2805,6898,133522,2,3162,3549,10724,7057,5594	1484	155	9658	1.97342	0.0159722	0.00801825	0.00742217
GOTERM_BP_FAT	GO:0009719~response to endogenous stimulus	82	4.03345	4.99955e-06	5167,3148,6464,5577,10401,255738,35,10580,197,283,51083,3484,3485,4929,3880,7390,2203,1827,7033,3291,5321,26524,230,1036,1081,7031,207,2805,133522,2,3549,440,10724,5936,7079,5786,5594,133,2625,1373,5105,762,5970,2628,217,6790,1843,2791,3949,6906,2274,10081,55970,7048,9021,8893,2026,2170,4015,6476,595,3570,5154,890,5244,598,8850,2308,5156,858,2690,189,857,8660,8754,5468,6898,3162,5337,5770,4144,70…	1484	328	9658	1.62702	0.0199711	0.00670186	0.00929921
GOTERM_BP_FAT	GO:0010033~response to organic substance	119	5.85342	0.000437411	3725,5167,3148,2149,255738,10401,35,1312,51083,283,3484,3485,4929,3880,2203,1827,10808,3291,2752,1081,207,133522,540,2,929,3549,3491,10724,5936,7079,6778,871,440275,83752,2625,5970,1075,2628,217,1843,2791,3949,2274,10081,7048,9021,2170,4015,6476,1846,595,5154,5244,890,598,8850,5156,2308,55937,189,8660,8754,6898,5337,5770,7057,6464,5577,2052,10580,197,9414,9695,6928,7390,780,3304,7033,3306,5321,33…	1484	577	9658	1.34222	0.828871	0.0681781	0.8105
Annotation Cluster 3	Enrichment Score: 3.922534259206634
Category	Term	Count	%	PValue	Genes	List Total	Pop Hits	Pop Total	Fold Enrichment	Bonferroni	Benjamini	FDR
GOTERM_BP_FAT	GO:0048545~response to steroid hormone stimulus	47	2.31185	3.99036e-06	133,3148,2625,1373,5970,762,35,217,51083,6790,1843,3949,6906,3485,3880,10081,9021,7048,2026,1827,6476,4015,595,3570,5154,3291,5244,890,5156,5321,858,2690,189,1036,857,8754,5468,7031,2805,6898,133522,2,3162,3549,10724,7057,5594	1484	155	9658	1.97342	0.0159722	0.00801825	0.00742217
GOTERM_BP_FAT	GO:0051384~response to glucocorticoid stimulus	22	1.08214	0.00037472	595,3570,133,5244,3291,5321,1373,35,2690,189,857,1036,8754,2805,6898,1843,133522,2,6906,3485,10081,6476	1484	64	9658	2.23715	0.779593	0.0610674	0.694719
GOTERM_BP_FAT	GO:0031960~response to corticosteroid stimulus	22	1.08214	0.00114203	595,3570,133,5244,3291,5321,1373,35,2690,189,857,1036,8754,2805,6898,1843,133522,2,6906,3485,10081,6476	1484	69	9658	2.07504	0.990055	0.130398	2.10307
Annotation Cluster 4	Enrichment Score: 3.5239351471157683
Category	Term	Count	%	PValue	Genes	List Total	Pop Hits	Pop Total	Fold Enrichment	Bonferroni	Benjamini	FDR
GOTERM_BP_FAT	GO:0009991~response to extracellular stimulus	48	2.36104	0.000117209	3725,6752,6751,133,1373,136,2934,255738,5970,35,2628,9388,1032,1843,4277,7421,432,3485,4929,6581,7048,9021,4232,6476,595,5154,3291,5321,4036,7037,8029,55937,3294,2690,650,857,5468,55172,207,7157,2,3162,8473,440,8273,9314,8435,440275	1484	180	9658	1.73549	0.376849	0.033219	0.217795
GOTERM_BP_FAT	GO:0031667~response to nutrient levels	45	2.21348	0.000132045	3725,6752,6751,133,1373,2934,255738,5970,35,2628,9388,1032,1843,4277,7421,3485,6581,7048,9021,4232,6476,595,5154,3291,5321,4036,7037,8029,55937,3294,2690,650,857,5468,55172,207,7157,2,3162,8473,440,8273,9314,8435,440275	1484	166	9658	1.76424	0.413062	0.0348989	0.24533
GOTERM_BP_FAT	GO:0032526~response to retinoic acid	13	0.639449	0.000193777	5.1544e+51	1484	26	9658	3.25404	0.542495	0.0403207	0.359829
GOTERM_BP_FAT	GO:0033189~response to vitamin A	15	0.737826	0.000255053	5.1544e+59	1484	34	9658	2.87121	0.642732	0.0501617	0.473359
GOTERM_BP_FAT	GO:0033273~response to vitamin	20	0.983768	0.000562572	5.95515e+78	1484	57	9658	2.28354	0.896751	0.0836266	1.04127
GOTERM_BP_FAT	GO:0007584~response to nutrient	32	1.57403	0.00166954	6752,6751,2934,5970,2628,9388,1032,1843,4277,7421,3485,7048,6476,4232,595,5154,5321,4036,7037,55937,8029,3294,650,857,5468,55172,2,3162,8473,8273,9314,8435	1484	119	9658	1.75007	0.99882	0.145121	3.06028
Annotation Cluster 5	Enrichment Score: 3.3740740566047855
Category	Term	Count	%	PValue	Genes	List Total	Pop Hits	Pop Total	Fold Enrichment	Bonferroni	Benjamini	FDR
KEGG_PATHWAY	hsa04610:Complement and coagulation cascades	24	1.18052	2.66821e-05	2147,2149,966,5104,3827,2266,5627,5624,5648,2243,5054,1604,5340,717,2,727,718,725,1675,2244,722,3053,2152,732	623	57	3618	2.44521	0.00495065	0.00495065	0.0330406
SP_PIR_KEYWORDS	plasma	23	1.13133	0.000998816	3250,3263,2147,3240,1191,3827,2266,5005,197,5624,2243,12,5340,3026,717,2,727,718,725,2244,5004,722,3053,732	1997	74	13223	2.05801	0.516402	0.135237	1.50325
GOTERM_BP_FAT	GO:0002526~acute inflammatory response	21	1.03296	0.00283186	3570,2147,1191,7037,90,5005,197,6291,5648,1604,12,717,2,727,718,725,1675,5004,722,2152,732	1484	69	9658	1.98072	0.999989	0.187834	5.13828
Annotation Cluster 6	Enrichment Score: 3.2716669443466757
Category	Term	Count	%	PValue	Genes	List Total	Pop Hits	Pop Total	Fold Enrichment	Bonferroni	Benjamini	FDR
GOTERM_BP_FAT	GO:0009611~response to wounding	88	4.32858	1.13365e-05	10344,2147,2919,2149,1191,1316,3827,197,51083,84962,7168,3484,2244,3053,2150,2152,50848,3576,27035,30008,7037,51090,308,6507,9060,4192,1036,6291,1903,7941,207,5648,26258,2,929,6364,7980,8455,8829,1490,732,5873,133,2934,966,7104,5970,1230,2628,928,2266,5005,1604,12,727,725,2596,6372,722,3556,64332,7048,2027,4015,259230,3570,375056,5154,53342,5156,90,5627,2920,650,5624,9373,5054,2243,5340,717,3162,…	1484	366	9658	1.56479	0.0447126	0.0113706	0.0210848
GOTERM_BP_FAT	GO:0006954~inflammatory response	50	2.45942	0.00138863	10344,2147,2149,1191,2919,3827,197,51083,2152,3576,50848,27035,7037,1903,6291,1036,207,7941,5648,929,2,6364,8455,732,5970,1230,5005,12,1604,727,725,6372,722,3556,64332,259230,3570,53342,90,2920,650,9373,717,3162,718,1675,5004,1535,7057,4069	1484	210	9658	1.54954	0.996328	0.137184	2.55166
GOTERM_BP_FAT	GO:0006952~defense response	75	3.68913	0.00972595	10344,2147,3240,2919,2149,1191,3827,197,51083,57679,114770,2152,50848,3576,602,27035,3250,8349,7033,4688,7037,1036,6291,1903,7941,207,5648,2,929,6364,1235,7305,8455,4600,58191,51473,732,5873,2625,8339,136,5970,1230,5005,665,1604,12,727,725,6372,8346,722,3556,64332,8343,259230,3570,53342,6622,90,55937,2920,650,57817,5468,9235,9373,717,3162,718,1675,5004,1672,5337,85236,1535,7057,4069	1484	372	9658	1.31211	1	0.371209	16.6229
Annotation Cluster 7	Enrichment Score: 3.0737643332746005
Category	Term	Count	%	PValue	Genes	List Total	Pop Hits	Pop Total	Fold Enrichment	Bonferroni	Benjamini	FDR
KEGG_PATHWAY	hsa04610:Complement and coagulation cascades	24	1.18052	2.66821e-05	2147,2149,966,5104,3827,2266,5627,5624,5648,2243,5054,1604,5340,717,2,727,718,725,1675,2244,722,3053,2152,732	623	57	3618	2.44521	0.00495065	0.00495065	0.0330406
GOTERM_BP_FAT	GO:0050878~regulation of body fluid levels	31	1.52484	0.000264348	5.87321e+121	1484	103	9658	1.95874	0.655887	0.0495306	0.490569
GOTERM_BP_FAT	GO:0042060~wound healing	38	1.86916	0.000721189	5.87321e+153	1484	143	9658	1.72942	0.945581	0.0924757	1.333
GOTERM_BP_FAT	GO:0007599~hemostasis	24	1.18052	0.00228861	5.87321e+94	1484	82	9658	1.90481	0.999903	0.162883	4.17236
GOTERM_BP_FAT	GO:0050817~coagulation	23	1.13133	0.00261435	5.87321e+90	1484	78	9658	1.91905	0.999974	0.177664	4.75265
GOTERM_BP_FAT	GO:0007596~blood coagulation	23	1.13133	0.00261435	5.87321e+90	1484	78	9658	1.91905	0.999974	0.177664	4.75265
SP_PIR_KEYWORDS	blood coagulation	13	0.639449	0.0038274	2.14721e+50	1997	35	13223	2.45939	0.938447	0.243298	5.64663
Annotation Cluster 8	Enrichment Score: 2.9443218140639282
Category	Term	Count	%	PValue	Genes	List Total	Pop Hits	Pop Total	Fold Enrichment	Bonferroni	Benjamini	FDR
GOTERM_CC_FAT	GO:0000267~cell fraction	171	8.41121	0.000104266	9453,2147,9456,9342,2332,3283,1312,1573,3728,57679,2743,3482,10139,6866,8877,4828,51429,5444,2203,64215,4922,5446,3291,11142,2651,4036,3710,8029,1081,27075,207,2326,540,1592,4121,1375,5836,2330,1811,9050,51762,6554,3995,6752,57552,6578,6751,19,7104,2767,91012,13,924,21,3034,51302,51196,57412,3416,6581,10018,1848,26999,4940,51700,22862,5244,51703,81537,5054,5340,10211,81542,5337,5770,7107,8435,657…	1417	816	8798	1.30113	0.0614293	0.0157243	0.154161
GOTERM_CC_FAT	GO:0042598~vesicular fraction	51	2.50861	0.000787858	10858,2054,2052,3283,1312,1573,57679,28972,5444,51429,64215,5446,3291,84649,3710,2326,4259,5507,8630,5590,1592,1375,2330,23682,1555,1551,56603,8694,57552,1743,3708,13,91012,51302,2222,5287,4133,4940,6715,22862,1733,6713,51703,5340,3162,3163,5337,7363,8435,9131,1837	1417	201	8798	1.57539	0.380725	0.0518525	1.1594
GOTERM_CC_FAT	GO:0005792~microsome	49	2.41023	0.00142008	10858,2054,2052,3283,1312,1573,57679,28972,5444,51429,64215,5446,3291,84649,3710,2326,4259,5507,8630,5590,1592,1375,2330,1555,1551,56603,8694,57552,1743,3708,13,91012,2222,51302,5287,4133,4940,6715,1733,6713,51703,5340,3162,3163,5337,7363,8435,9131,1837	1417	196	8798	1.55222	0.578537	0.082775	2.0807
SP_PIR_KEYWORDS	microsome	23	1.13133	0.00177108	57552,10858,6715,3291,6713,2052,13,2326,1573,4259,8630,51302,3162,28972,3163,1592,2330,1555,7363,5287,64215,1551,56603	1997	77	13223	1.97783	0.724376	0.16815	2.65104
GOTERM_CC_FAT	GO:0005624~membrane fraction	124	6.09936	0.00316689	9456,9342,3283,1312,3728,1573,57679,2743,3482,10139,8877,51429,5444,64215,5446,3291,2651,4036,3710,8029,27075,2326,540,1592,4121,1375,1811,2330,9050,6554,6752,3995,57552,6578,6751,19,7104,2767,91012,13,924,21,51302,51196,6581,10018,26999,4940,22862,5244,51703,81537,10211,5340,81542,5337,7107,8435,6575,1837,2054,10858,9514,4354,5577,2052,23554,382,28972,388,637,5321,84649,4363,6505,6507,4259,10105…	1417	609	8798	1.26421	0.854638	0.148461	4.58475
GOTERM_CC_FAT	GO:0005626~insoluble fraction	128	6.29611	0.00329832	9456,9342,3283,1312,3728,1573,57679,2743,3482,10139,8877,51429,5444,64215,5446,3291,2651,4036,3710,8029,27075,2326,540,1592,4121,1375,1811,2330,9050,51762,6554,6752,3995,57552,6578,6751,19,7104,2767,91012,13,924,21,51302,51196,6581,10018,26999,4940,22862,5244,51703,81537,10211,5340,81542,5337,5770,7107,8435,6575,1837,2054,10858,9514,4354,5577,2052,23554,382,28972,388,637,5321,84649,4363,6505,6507…	1417	632	8798	1.2575	0.865836	0.143169	4.77071
Annotation Cluster 9	Enrichment Score: 2.847749405320966
Category	Term	Count	%	PValue	Genes	List Total	Pop Hits	Pop Total	Fold Enrichment	Bonferroni	Benjamini	FDR
GOTERM_BP_FAT	GO:0010035~response to inorganic substance	42	2.06591	0.000623133	3725,140576,4331,2934,5970,2628,2266,10397,23467,1843,7168,7390,3485,2244,4929,57412,60,100,595,57491,5154,6622,5156,598,5321,6649,3710,7037,27345,6507,857,8754,7031,5054,2243,540,6898,4891,2,3162,4501,7057	1484	162	9658	1.68728	0.919147	0.0889457	1.15275
GOTERM_BP_FAT	GO:0010038~response to metal ion	28	1.37727	0.00157628	140576,4331,2934,2628,2266,10397,1843,2244,3485,60,595,57491,6622,598,6649,5321,3710,7037,27345,857,8754,7031,2243,540,6898,4891,4501,7057	1484	99	9658	1.84067	0.99828	0.140629	2.8917
GOTERM_BP_FAT	GO:0051592~response to calcium ion	15	0.737826	0.00291433	595,57491,140576,4331,5321,3710,27345,2266,857,8754,2243,1843,2244,60,7057	1484	42	9658	2.32432	0.999992	0.189654	5.28411
Annotation Cluster 10	Enrichment Score: 2.7991368276575685
Category	Term	Count	%	PValue	Genes	List Total	Pop Hits	Pop Total	Fold Enrichment	Bonferroni	Benjamini	FDR
GOTERM_BP_FAT	GO:0050818~regulation of coagulation	17	0.836203	1.95075e-05	2.14752e+62	1484	35	9658	3.16107	0.0756954	0.0156195	0.0362796
GOTERM_BP_FAT	GO:0030193~regulation of blood coagulation	15	0.737826	4.87684e-05	5.15421e+56	1484	30	9658	3.25404	0.178633	0.0216277	0.0906747
GOTERM_BP_FAT	GO:0032101~regulation of response to external stimulus	33	1.62322	0.00014222	2147,2149,136,3827,197,2877,10488,2150,7048,4907,2152,80762,100,3576,3570,5154,302,5321,3273,304,9353,1901,857,5624,5468,5054,1906,5648,5340,2,718,185,7057	1484	109	9658	1.97034	0.436675	0.035233	0.264211
GOTERM_BP_FAT	GO:0050819~negative regulation of coagulation	11	0.541072	0.00175453	5.15421e+39	1484	24	9658	2.98287	0.999163	0.148742	3.21368
GOTERM_BP_FAT	GO:0030195~negative regulation of blood coagulation	9	0.442696	0.00950954	5.15421e+33	1484	21	9658	2.78918	1	0.368074	16.2834
GOTERM_BP_FAT	GO:0042730~fibrinolysis	5	0.245942	0.0986661	2.1473e+17	1484	12	9658	2.7117	1	0.846065	85.5178
GOTERM_BP_FAT	GO:0051241~negative regulation of multicellular organismal process	24	1.18052	0.114355	3.57021e+90	1484	116	9658	1.3465	1	0.866877	89.5532
Annotation Cluster 11	Enrichment Score: 2.661569763991254
Category	Term	Count	%	PValue	Genes	List Total	Pop Hits	Pop Total	Fold Enrichment	Bonferroni	Benjamini	FDR
GOTERM_MF_FAT	GO:0042802~identical protein binding	107	5.26316	0.000609167	7205,10206,5167,8416,64112,5164,8887,255738,90390,57679,51084,51421,7165,51776,10488,7164,22900,7163,2203,5444,4217,127262,7486,1280,5446,8029,2752,207,5648,26258,1510,5836,26353,1278,140576,11340,5970,2316,1075,217,373156,93166,55722,6282,6470,2274,29970,3416,25801,5805,9429,5154,598,5156,9421,90,1063,189,5053,6676,1632,7057,7704,10856,23171,5062,9076,6928,432,29896,5793,9069,3956,9702,440,8829,…	1407	517	9211	1.3549	0.579323	0.351404	1.00079
GOTERM_MF_FAT	GO:0042803~protein homodimerization activity	59	2.90212	0.000651645	5167,8416,64112,5164,7704,23171,57679,51084,6928,432,7165,10488,22900,7164,7163,5444,4217,7486,5446,8029,5648,3956,9702,440,1510,9217,5836,3248,4085,11045,2132,140576,2131,84451,2936,2316,665,93166,6282,6470,3416,2027,2026,25801,5805,9429,63826,3570,5154,7013,5156,9421,90,858,2690,189,1063,650,5053	1407	252	9211	1.53272	0.60398	0.265645	1.07023
GOTERM_MF_FAT	GO:0046983~protein dimerization activity	80	3.93507	0.0260941	3725,5167,8416,64112,5164,7704,23171,57679,51084,6928,55509,432,1052,7165,4929,10488,22900,7164,7163,10300,5444,4217,7486,5446,57491,23649,8029,5648,274,9702,3956,1510,440,5836,9217,3248,4085,2569,11045,140576,2132,2131,84451,2936,5087,2316,665,93166,6282,6470,5422,3416,2027,7048,2026,25801,5805,9429,63826,3570,5154,23590,598,7013,9421,5156,2730,90,915,858,2690,189,650,1063,5468,5053,7157,185,638…	1407	421	9211	1.244	1	0.81874	35.367
Annotation Cluster 12	Enrichment Score: 2.5417996434536296
Category	Term	Count	%	PValue	Genes	List Total	Pop Hits	Pop Total	Fold Enrichment	Bonferroni	Benjamini	FDR
GOTERM_CC_FAT	GO:0031091~platelet alpha granule	18	0.885391	0.000133625	1191,3273,5175,2266,928,26276,5627,6678,2243,351,7060,2,1675,2244,7076,87,7044,7057	1417	42	8798	2.66095	0.0780361	0.0161185	0.197529
GOTERM_CC_FAT	GO:0060205~cytoplasmic membrane-bounded vesicle lumen	16	0.787014	0.000322748	5154,3273,1191,2266,5627,6678,2243,351,7060,2,1675,2244,7076,87,7044,7057	1417	37	8798	2.68493	0.178203	0.0321812	0.476476
GOTERM_CC_FAT	GO:0031093~platelet alpha granule lumen	15	0.737826	0.000598211	3273,1191,2266,5627,6678,2243,351,7060,2,1675,2244,7076,87,7057,7044	1417	35	8798	2.66095	0.304985	0.0506469	0.881471
GOTERM_CC_FAT	GO:0031983~vesicle lumen	16	0.787014	0.000630434	5154,3273,1191,2266,5627,6678,2243,351,7060,2,1675,2244,7076,87,7044,7057	1417	39	8798	2.54724	0.318477	0.0467977	0.928746
GOTERM_CC_FAT	GO:0030141~secretory granule	33	1.62322	0.00674568	5873,1191,3708,928,2266,51083,6678,21,7060,2244,87,7044,4922,10257,7033,9501,5154,22862,3273,4688,5321,27344,5175,26276,5627,2243,351,2,1675,7076,1535,5125,7057	1417	129	8798	1.58832	0.983678	0.254684	9.52958
GOTERM_CC_FAT	GO:0016023~cytoplasmic membrane-bounded vesicle	81	3.98426	0.0781972	2054,1191,26511,2098,5479,7456,51083,55435,23208,7060,3482,9143,2244,87,10133,4922,127262,7033,9501,302,5321,4688,4036,304,5175,7037,8029,79890,9871,274,540,2,163,7076,23682,115677,5125,5873,822,81611,3708,19,23678,928,2266,6678,21,3949,81562,83988,80331,83716,5287,80023,4908,23392,6477,7044,10257,85409,5154,22862,3273,27344,326624,5627,26276,858,2243,10211,351,9182,1675,6386,397,10457,1535,526,5…	1417	428	8798	1.17505	1	0.861963	70.0233
GOTERM_CC_FAT	GO:0044433~cytoplasmic vesicle part	28	1.37727	0.187906	5873,1191,3708,928,2266,6678,7060,3949,83988,2244,87,7044,10257,9501,5154,3273,5175,5627,9871,858,2243,351,9182,2,163,1675,7076,7057	1417	141	8798	1.23297	1	0.920419	95.4024
Annotation Cluster 13	Enrichment Score: 2.383655871878419
Category	Term	Count	%	PValue	Genes	List Total	Pop Hits	Pop Total	Fold Enrichment	Bonferroni	Benjamini	FDR
GOTERM_BP_FAT	GO:0001525~angiogenesis	31	1.52484	0.00122365	3725,688,7127,283,8817,388,7048,3576,27035,5154,302,9421,304,9353,90,1901,1906,51330,3162,3549,182,3491,7342,8828,8829,1490,58504,3911,7057,2821,23129	1484	112	9658	1.80135	0.992849	0.135244	2.25176
GOTERM_BP_FAT	GO:0001944~vasculature development	45	2.21348	0.00509138	3725,688,23462,1045,7127,283,2296,8817,388,7048,3200,4015,3576,27035,5154,302,9421,2308,304,9353,90,1901,857,207,23493,1906,51330,27329,3162,3549,1399,182,3491,8828,7342,8829,1490,58504,3911,1278,4643,4838,7057,2821,23129	1484	196	9658	1.4942	1	0.261316	9.05781
GOTERM_BP_FAT	GO:0001568~blood vessel development	44	2.16429	0.00582725	3725,688,23462,1045,7127,283,2296,8817,388,7048,3200,4015,3576,27035,5154,302,9421,2308,304,9353,90,1901,857,207,23493,1906,51330,27329,3162,3549,1399,182,3491,8828,7342,8829,1490,58504,3911,1278,4643,7057,2821,23129	1484	192	9658	1.49144	1	0.282611	10.3009
GOTERM_BP_FAT	GO:0048514~blood vessel morphogenesis	38	1.86916	0.00804304	3725,688,23462,7127,283,2296,8817,388,7048,3200,3576,27035,5154,302,9421,304,9353,90,1901,857,1906,23493,51330,27329,3162,3549,182,3491,8828,7342,8829,1490,58504,3911,4643,7057,2821,23129	1484	163	9658	1.51722	1	0.341476	13.9475
Annotation Cluster 14	Enrichment Score: 2.2571281036791953
Category	Term	Count	%	PValue	Genes	List Total	Pop Hits	Pop Total	Fold Enrichment	Bonferroni	Benjamini	FDR
GOTERM_BP_FAT	GO:0040017~positive regulation of locomotion	24	1.18052	0.00191974	7.20536e+101	1484	81	9658	1.92832	0.999571	0.158275	3.5112
GOTERM_BP_FAT	GO:0040012~regulation of locomotion	39	1.91835	0.00205037	7.20521e+160	1484	156	9658	1.62702	0.999747	0.161556	3.74584
GOTERM_BP_FAT	GO:0030335~positive regulation of cell migration	22	1.08214	0.00498519	7.20536e+93	1484	77	9658	1.85945	1	0.259906	8.87709
GOTERM_BP_FAT	GO:0030334~regulation of cell migration	34	1.67241	0.00924102	7.20521e+141	1484	143	9658	1.54738	1	0.366718	15.8602
GOTERM_BP_FAT	GO:0051270~regulation of cell motion	38	1.86916	0.00981739	7205,2149,10395,3383,84962,7168,10488,8877,5797,2150,2152,87,100,3570,375056,5154,5156,582,22846,1901,3611,8660,8754,207,1906,5340,27329,3162,182,8195,8829,5337,5270,55615,3911,58191,7057,5594	1484	165	9658	1.49883	1	0.370541	16.766
GOTERM_BP_FAT	GO:0051272~positive regulation of cell motion	22	1.08214	0.0160975	7.20536e+93	1484	85	9658	1.68445	1	0.477085	26.0562
Annotation Cluster 15	Enrichment Score: 2.038314350892759
Category	Term	Count	%	PValue	Genes	List Total	Pop Hits	Pop Total	Fold Enrichment	Bonferroni	Benjamini	FDR
GOTERM_MF_FAT	GO:0030246~carbohydrate binding	51	2.50861	0.001789	5.16795e+215	1407	219	9211	1.52454	0.921484	0.246267	2.91243
GOTERM_MF_FAT	GO:0005539~glycosaminoglycan binding	25	1.22971	0.00737736	5.10495e+102	1407	95	9211	1.72278	0.999973	0.583904	11.5052
GOTERM_MF_FAT	GO:0030247~polysaccharide binding	26	1.2789	0.00947003	5.16751e+106	1407	102	9211	1.66873	0.999999	0.619317	14.535
GOTERM_MF_FAT	GO:0001871~pattern binding	26	1.2789	0.00947003	5.16751e+106	1407	102	9211	1.66873	0.999999	0.619317	14.535
GOTERM_MF_FAT	GO:0008201~heparin binding	20	0.983768	0.0116387	6.64933e+81	1407	73	9211	1.79358	1	0.646449	17.5718
SP_PIR_KEYWORDS	heparin-binding	13	0.639449	0.0427557	6.64933e+51	1997	47	13223	1.83146	1	0.539211	48.4341

## Sheet: Huh-7.5.1 to Huh-7.5.1c2
Annotation Cluster 1	Enrichment Score: 7.087317427974781
Category	Term	Count	%	PValue	Genes	List Total	Pop Hits	Pop Total	Fold Enrichment	Bonferroni	Benjamini	FDR
SP_PIR_KEYWORDS	glycoprotein	67	35.8289	4.4763e-09	9244,4753,10991,9746,55808,8842,4072,57134,114770,10381,432,253012,8324,126969,7162,284111,8501,2202,2153,114571,29940,2014,4036,7036,140862,11182,345,27075,27122,3547,1,3549,9056,8788,2331,2161,2984,1370,7103,5104,133584,762,130576,866,13,7040,56122,7373,6581,54682,10637,629,6476,2041,83539,5244,205327,92,56667,30061,57549,1015,5340,462,718,9843,80704	183	2402	13223	2.01549	1.41451e-06	1.41451e-06	6.02907e-06
UP_SEQ_FEATURE	glycosylation site:N-linked (GlcNAc...)	64	34.2246	9.58781e-09	9244,4753,10991,9746,55808,8842,4072,57134,114770,10381,432,253012,8324,126969,7162,284111,8501,2202,2153,114571,29940,2014,4036,140862,7036,11182,27075,27122,3547,1,3549,9056,8788,2331,2161,2984,1370,7103,5104,133584,866,13,7040,56122,7373,6581,54682,10637,629,6476,2041,83539,5244,205327,92,56667,30061,57549,1015,5340,462,718,9843,80704	183	2276	13210	2.02983	7.44012e-06	7.44012e-06	1.46584e-05
SP_PIR_KEYWORDS	disulfide bond	48	25.6684	1.89223e-08	1370,10344,10267,133584,762,2267,9244,4753,56301,13,55808,2697,4072,7040,114770,56122,253012,8324,432,7373,10637,2202,2153,6476,629,5266,4036,140862,92,7036,56667,57549,7031,5340,462,27122,3547,10551,115701,1,9056,718,7305,8788,9843,2331,2161,3958	183	1468	13223	2.36262	5.97944e-06	2.98972e-06	2.54862e-05
SP_PIR_KEYWORDS	signal	56	29.9465	2.0888e-08	10344,9244,4753,9746,8842,4072,114770,253012,8324,7162,2202,2153,5266,29940,4036,140862,116519,345,7031,27122,3547,1,3549,7305,8788,2331,2161,2984,670,1370,10267,5104,133584,762,2267,130576,866,7040,56122,7373,54682,10637,629,4016,2041,205327,27344,92,56667,57549,1015,5340,462,10551,718,9843	183	1886	13223	2.14548	6.60057e-06	2.2002e-06	2.81337e-05
UP_SEQ_FEATURE	signal peptide	56	29.9465	2.16186e-08	10344,9244,4753,9746,8842,4072,114770,253012,8324,7162,2202,2153,5266,29940,4036,140862,116519,345,7031,27122,3547,1,3549,7305,8788,2331,2161,2984,670,1370,10267,5104,133584,762,2267,130576,866,7040,56122,7373,54682,10637,629,4016,2041,205327,27344,92,56667,57549,1015,5340,462,10551,718,9843	183	1886	13210	2.14337	1.67759e-05	8.38797e-06	3.30518e-05
SP_PIR_KEYWORDS	Secreted	35	18.7166	1.46537e-07	1370,10344,5104,133584,2267,9244,4753,866,7040,114770,7373,10637,2153,2202,629,4016,5266,83539,140862,205327,27344,56667,116519,345,7031,5340,462,27122,3547,10551,3549,1,718,2331,2161	183	935	13223	2.7048	4.63047e-05	1.15764e-05	0.000197369
GOTERM_CC_FAT	GO:0044421~extracellular region part	29	15.508	1.70637e-07	1.03441e+119	145	580	8798	3.03379	3.56626e-05	3.56626e-05	0.000215417
GOTERM_CC_FAT	GO:0005615~extracellular space	23	12.2995	8.14662e-07	1.03441e+93	145	412	8798	3.38724	0.00017025	8.51286e-05	0.00102845
GOTERM_CC_FAT	GO:0005576~extracellular region	41	21.9251	8.79364e-07	1370,10344,10267,5104,133584,2267,9244,4753,866,8842,7040,114770,7373,10637,2153,2202,629,4016,5266,83539,4036,140862,205327,27344,56667,116519,345,7031,5340,462,27122,3547,10551,3549,1,718,8788,2331,2161,231,3958	145	1119	8798	2.22315	0.00018377	6.12605e-05	0.00111013
UP_SEQ_FEATURE	disulfide bond	42	22.4599	2.03855e-06	10344,10267,133584,762,2267,9244,4753,13,55808,2697,4072,7040,114770,56122,253012,8324,432,10637,2202,2153,629,6476,5266,4036,140862,92,7036,56667,57549,7031,5340,462,27122,3547,115701,1,718,8788,9843,2331,2161,3958	183	1398	13210	2.16867	0.00158067	0.000527166	0.00311661
Annotation Cluster 2	Enrichment Score: 2.3249508351453394
Category	Term	Count	%	PValue	Genes	List Total	Pop Hits	Pop Total	Fold Enrichment	Bonferroni	Benjamini	FDR
UP_SEQ_FEATURE	transmembrane region	61	32.6203	0.000610317	2705,10991,56301,9746,55808,8842,4072,57134,10381,253012,8324,432,126969,29957,7162,284111,8501,114571,29940,154141,2014,4036,7036,11182,27075,6252,3547,9056,7305,1040,8788,2984,51471,131616,10267,7103,155066,13,192683,2697,66002,56122,6581,54682,6476,2041,83539,5244,92,56667,30061,57549,1015,10280,116843,79134,9843,10787,221303,120224,80704	183	2954	13210	1.49063	0.377338	0.111693	0.929032
SP_PIR_KEYWORDS	transmembrane	61	32.6203	0.000693011	2705,10991,56301,9746,55808,8842,4072,57134,10381,253012,8324,432,126969,29957,7162,284111,8501,114571,29940,154141,2014,4036,7036,11182,27075,6252,3547,9056,7305,1040,8788,2984,51471,131616,10267,7103,155066,13,192683,2697,66002,56122,6581,54682,6476,2041,83539,5244,92,56667,30061,57549,1015,10280,116843,79134,9843,10787,221303,120224,80704	183	2971	13223	1.48356	0.196732	0.0308107	0.929385
UP_SEQ_FEATURE	topological domain:Extracellular	33	17.6471	0.00141118	10267,7103,2705,192683,9746,8842,2697,4072,10381,56122,8324,432,253012,7162,54682,114571,2041,5244,4036,7036,92,56667,11182,57549,27075,1015,10280,3547,7305,8788,9843,2984,80704	183	1342	13210	1.77506	0.665745	0.196815	2.13589
SP_PIR_KEYWORDS	membrane	73	39.0374	0.00398368	2705,10991,56301,9746,55808,8842,4072,57134,114770,10381,432,8324,253012,126969,29957,7162,284111,8501,114571,154141,29940,2014,4036,7036,11182,27075,6252,3547,3549,9056,1040,7305,1592,8788,23413,2984,51471,131616,10267,7103,762,155066,130576,192683,13,2786,2697,66002,56122,6581,54682,6476,2041,83539,5244,92,56667,6277,30061,57549,1015,10280,522,116843,2781,9843,79134,6386,7262,10787,120224,22130…	183	3985	13223	1.32365	0.716731	0.130773	5.23432
UP_SEQ_FEATURE	topological domain:Cytoplasmic	38	20.3209	0.0115226	10267,7103,2705,13,192683,55808,9746,8842,2697,57134,4072,10381,56122,8324,432,253012,7162,54682,6476,114571,2041,83539,5244,4036,7036,92,56667,11182,57549,27075,1015,10280,3547,7305,8788,9843,2984,80704	183	1850	13210	1.48274	0.999876	0.593164	16.2377
GOTERM_CC_FAT	GO:0031224~intrinsic to membrane	66	35.2941	0.0363043	2705,10991,56301,9746,55808,8842,4072,57134,10381,253012,8324,432,126969,29957,7162,284111,8501,114571,154141,29940,2014,4036,7036,11182,27075,6252,3547,9056,1040,7305,8788,2984,51471,131616,10267,7103,762,155066,130576,13,192683,2697,66002,56122,6581,54682,6476,2041,83539,5244,92,56667,30061,10493,57549,1015,10280,116843,2781,79134,9843,6386,10787,120224,221303,80704	145	3304	8798	1.21205	0.99956	0.576309	37.302
GOTERM_CC_FAT	GO:0016021~integral to membrane	63	33.6898	0.053416	2705,10991,56301,9746,55808,8842,4072,57134,10381,253012,8324,432,126969,29957,7162,284111,8501,114571,154141,29940,2014,4036,7036,11182,27075,6252,3547,9056,7305,1040,8788,2984,51471,131616,10267,7103,155066,13,192683,2697,66002,56122,6581,54682,6476,2041,83539,5244,92,56667,30061,10493,57549,1015,10280,116843,79134,9843,6386,10787,120224,221303,80704	145	3190	8798	1.1983	0.99999	0.64761	49.9935

## Sheet: Huh-7.5.1 to R1
Annotation Cluster 1	Enrichment Score: 10.546229342387813
Category	Term	Count	%	PValue	Genes	List Total	Pop Hits	Pop Total	Fold Enrichment	Bonferroni	Benjamini	FDR
SP_PIR_KEYWORDS	Secreted	174	12.2363	2.60946e-14	5168,10344,2147,7498,3339,9244,84279,51083,283,10924,6351,3485,59342,11098,2202,2153,4922,2200,5446,375704,1280,2657,9636,375790,81623,5176,7286,3489,3487,4192,4885,5649,51232,1906,79154,27122,3918,27329,6692,2,1,3491,2331,2161,1490,283869,7076,3911,7079,4693,1278,93099,732,22795,10673,10272,3898,130574,3026,167681,10220,7042,729,1842,725,3698,3697,1462,7045,7044,10516,83539,53342,5154,5768,10491…	1397	935	13223	1.76145	1.69587e-11	1.69587e-11	3.89577e-11
GOTERM_CC_FAT	GO:0044421~extracellular region part	125	8.79044	4.61618e-13	10344,2147,9244,3339,8743,283,10924,7060,6351,3485,2152,2153,2202,2200,5446,1280,9636,2657,375790,5176,3489,3487,5649,1906,27122,3918,27329,2,2331,2161,1490,7076,3911,7079,4693,1278,93099,732,4224,22795,10673,10272,3898,10220,3026,7042,729,1842,146223,1462,7045,7044,10516,53342,5154,5768,10491,5345,10512,10417,8754,9235,718,183,81577,4811,3426,710,5817,4148,4147,3240,2810,2919,3827,197,8842,3964,…	1000	580	8798	1.89612	2.37278e-10	2.37278e-10	6.67344e-10
SP_PIR_KEYWORDS	disulfide bond	240	16.8776	5.68625e-13	10347,10344,10205,7498,1193,7060,6351,8323,3485,6768,11098,2202,2200,56913,8406,6091,80731,6092,8029,3489,3487,5649,4885,57211,3918,2,1,3491,2331,1490,8869,7076,3911,7079,2842,732,6752,4224,22795,928,167681,10220,7042,729,725,1462,7045,6476,7044,5345,8754,718,182,183,185,715,710,4148,3240,4147,3827,4753,3386,56301,6590,4072,253012,432,51279,3250,23022,7976,2264,4982,975,10437,10577,115701,8455,79…	1397	1468	13223	1.54746	3.69627e-10	1.84813e-10	8.49054e-10
GOTERM_CC_FAT	GO:0005576~extracellular region	199	13.9944	9.32778e-12	10344,8743,84279,51083,7060,6351,3485,59342,6768,11098,2202,2200,375704,3489,3487,5649,4885,3918,2,1,3491,2331,1490,7076,7079,3911,732,4224,22795,130574,167681,10220,7042,729,1842,725,1462,7045,7044,5768,10491,5345,8754,718,182,81577,183,715,710,4148,3240,4147,10855,3827,4753,3386,6590,8842,3964,51279,3250,4982,10437,10577,3956,7980,8455,8829,3958,5125,4681,10267,4879,966,5104,3606,200879,5005,26…	1000	1119	8798	1.56461	4.79447e-09	2.39723e-09	1.34845e-08
UP_SEQ_FEATURE	disulfide bond	226	15.8931	1.02761e-11	10347,10344,10205,7498,1193,7060,6351,8323,3485,6768,11098,2202,2200,8406,6091,80731,6092,8029,3489,3487,5649,4885,57211,3918,2,1,3491,2331,1490,8869,7076,3911,7079,2842,732,6752,4224,22795,167681,10220,7042,729,725,1462,7045,6476,7044,5345,8754,718,182,715,185,710,4148,3240,4147,3827,4753,3386,6590,4072,253012,432,51279,3250,23022,7976,2264,975,4982,10437,10577,115701,8455,7980,8829,3958,2569,32…	1395	1398	13210	1.53084	3.58431e-08	3.58431e-08	1.88144e-08
UP_SEQ_FEATURE	signal peptide	286	20.1125	1.78957e-11	10344,10205,84279,51083,7060,6351,8323,3485,59342,11098,7162,1829,2202,2200,375704,8875,8876,92359,8406,6091,80731,6092,8029,3489,3487,5649,4885,57211,2,3918,28513,1,3491,2331,1490,7076,3911,7079,732,4224,22795,130576,130574,10220,167681,7042,729,1842,121506,5349,725,54682,1462,7045,7044,5768,10491,5345,8754,84873,718,182,183,81577,715,710,4148,4147,3240,10855,3827,4753,3386,6590,8842,4072,23753,…	1395	1886	13210	1.436	6.24201e-08	3.12101e-08	3.27651e-08
SP_PIR_KEYWORDS	signal	286	20.1125	1.89703e-11	10344,10205,84279,51083,7060,6351,8323,3485,59342,11098,7162,1829,2202,2200,375704,8875,8876,92359,8406,6091,80731,6092,8029,3489,3487,5649,4885,57211,2,3918,28513,1,3491,2331,1490,7076,3911,7079,732,4224,22795,130576,130574,10220,167681,7042,729,1842,121506,5349,725,54682,1462,7045,7044,5768,10491,5345,8754,84873,718,182,183,81577,715,710,4148,4147,3240,10855,3827,4753,3386,6590,8842,4072,23753,…	1397	1886	13223	1.43535	1.23307e-08	4.11023e-09	2.83245e-08
GOTERM_CC_FAT	GO:0005615~extracellular space	91	6.39944	3.08797e-10	10344,2147,2810,3240,2919,9244,3827,197,8743,283,8842,10924,6351,3964,3485,80781,2152,2153,51279,2200,3576,3250,1280,5446,9636,2657,5176,3489,632,3487,7031,5649,1906,27122,2,3918,27329,3956,8455,8788,2161,231,7079,4693,58191,1278,93099,5125,732,4224,10267,4879,2934,3069,3606,10673,10272,5005,1950,10220,3026,7042,729,146223,6906,4050,7276,3075,7045,7044,5154,53342,59272,1361,5768,652,5345,650,1051…	1000	412	8798	1.94325	1.58722e-07	5.29073e-08	4.46407e-07
SP_PIR_KEYWORDS	glycoprotein	329	23.1364	6.95893e-08	10347,10205,7498,10991,84279,203413,7060,8323,3485,59342,6768,11098,7162,1829,2202,2200,8875,8876,92359,1182,80731,6091,6092,8029,3489,3487,27075,5649,4885,57211,2,3918,28513,1,2331,8869,1490,7076,3911,2842,90139,732,6752,4224,346606,54886,22795,130576,928,130574,10220,167681,7042,729,1842,725,54682,1462,7044,6476,206338,5243,51280,5768,10491,5345,8754,124935,84873,718,182,183,185,715,710,85455,1…	1397	2402	13223	1.29645	4.52321e-05	1.13082e-05	0.000103904
UP_SEQ_FEATURE	glycosylation site:N-linked (GlcNAc...)	314	22.0816	7.20113e-08	10347,10205,7498,10991,84279,203413,7060,8323,59342,6768,11098,7162,1829,2202,2200,8875,8876,92359,1182,6091,80731,6092,8029,3487,27075,5649,4885,57211,2,3918,28513,1,2331,8869,1490,7076,3911,2842,90139,732,6752,4224,346606,54886,22795,928,130574,10220,167681,7042,729,1842,725,54682,1462,7044,6476,206338,5243,51280,5768,10491,5345,8754,124935,84873,718,182,183,185,715,710,85455,1836,115,4147,3240…	1395	2276	13210	1.30643	0.000251144	8.37217e-05	0.000131845
Annotation Cluster 2	Enrichment Score: 5.030756979732517
Category	Term	Count	%	PValue	Genes	List Total	Pop Hits	Pop Total	Fold Enrichment	Bonferroni	Benjamini	FDR
GOTERM_BP_FAT	GO:0009611~response to wounding	74	5.20394	1.29585e-07	10344,2147,6774,2149,2919,3827,197,51083,6351,7168,3053,2150,2152,2153,51279,3576,27035,301,8876,2122,51090,6507,9060,4192,839,6256,3487,2,6198,5359,8455,7980,8829,1490,2161,732,5873,2934,966,316,928,2628,1230,5005,1604,7042,729,725,353376,1543,1462,3075,11343,10516,3673,5154,53342,9734,5345,650,4485,350,462,1832,718,1675,5004,715,26471,3426,891,4065,710,1535	1049	366	9658	1.8615	0.000450594	0.000450594	0.000237181
GOTERM_BP_FAT	GO:0002526~acute inflammatory response	23	1.61744	1.9044e-06	2147,6774,8876,5005,197,5345,839,1604,2,729,718,725,1675,715,5004,26471,2161,3426,710,2152,3075,732,51279	1049	69	9658	3.06895	0.00660162	0.00330628	0.0034856
GOTERM_BP_FAT	GO:0006954~inflammatory response	45	3.16456	1.17686e-05	10344,2147,6774,2149,2919,316,3827,1230,197,5005,51083,1604,729,6351,725,353376,2152,3075,11343,51279,3576,27035,53342,301,8876,2122,9734,5345,3487,6256,650,839,2,718,8455,1675,5004,715,26471,3426,2161,710,4065,1535,732	1049	210	9658	1.9729	0.0401051	0.00510336	0.0215381
GOTERM_BP_FAT	GO:0006952~defense response	59	4.14909	0.00259379	10344,2147,3240,6774,2149,2919,3827,197,27063,51083,6351,23406,2152,51279,3576,3250,27035,7033,301,8876,4688,81623,2122,3487,839,6256,2,8455,2161,58191,51473,732,5873,316,1230,5005,1604,729,725,353376,3075,11343,53342,9734,5345,57817,650,9235,5468,3764,718,1675,5004,715,26471,3426,7716,710,4065,1535	1049	372	9658	1.46023	0.999881	0.17154	4.64242
Annotation Cluster 3	Enrichment Score: 4.418539565542959
Category	Term	Count	%	PValue	Genes	List Total	Pop Hits	Pop Total	Fold Enrichment	Bonferroni	Benjamini	FDR
GOTERM_BP_FAT	GO:0000278~mitotic cell cycle	65	4.57103	2.64584e-06	1.12586e+273	1049	332	9658	1.80255	0.00916002	0.00306271	0.00484261
SP_PIR_KEYWORDS	mitosis	39	2.74262	4.06792e-06	1.12588e+166	1397	168	13223	2.1973	0.00264066	0.000528691	0.00607362
GOTERM_BP_FAT	GO:0000280~nuclear division	44	3.09423	4.97772e-06	1.12588e+189	1049	197	9658	2.05636	0.0171636	0.00431879	0.00911041
GOTERM_BP_FAT	GO:0007067~mitosis	44	3.09423	4.97772e-06	1.12588e+189	1049	197	9658	2.05636	0.0171636	0.00431879	0.00911041
GOTERM_BP_FAT	GO:0048285~organelle fission	45	3.16456	5.37947e-06	1.12588e+193	1049	204	9658	2.03093	0.0185359	0.00373498	0.00984567
GOTERM_BP_FAT	GO:0022403~cell cycle phase	69	4.85232	7.25987e-06	1.12586e+294	1049	370	9658	1.71696	0.0249338	0.00419948	0.013287
GOTERM_BP_FAT	GO:0000087~M phase of mitotic cell cycle	44	3.09423	7.47661e-06	1.12588e+189	1049	200	9658	2.02551	0.0256686	0.00370793	0.0136837
GOTERM_BP_FAT	GO:0000279~M phase	55	3.86779	5.94906e-05	1.12586e+238	1049	293	9658	1.72825	0.186911	0.0136996	0.108831
SP_PIR_KEYWORDS	cell division	46	3.23488	8.94973e-05	1.12589e+196	1397	240	13223	1.81418	0.056516	0.00724561	0.133545
SP_PIR_KEYWORDS	cell cycle	69	4.85232	0.000126488	1.12586e+297	1397	413	13223	1.58137	0.078933	0.00818854	0.188693
GOTERM_BP_FAT	GO:0022402~cell cycle process	80	5.62588	0.00046331	11258,64151,332,8317,22974,10381,10300,701,220042,5889,259266,3576,203,8493,56992,3306,5705,632,5608,9918,79980,9212,11004,8452,4751,586,10579,9055,29945,56603,10460,9319,81610,4739,23397,113130,1028,1027,1026,9092,79866,6790,7042,10083,1033,348235,1030,1647,6787,51512,5699,54069,55143,221150,55872,890,11065,699,323,1111,3832,5720,1063,3014,1778,5530,9232,996,57405,994,995,9133,1058,83540,993,991…	1049	506	9658	1.45563	0.800465	0.0624363	0.844613
GOTERM_CC_FAT	GO:0005819~spindle	30	2.1097	0.000545049	1.12588e+132	1000	136	8798	1.94074	0.244391	0.0344225	0.785057
GOTERM_BP_FAT	GO:0007049~cell cycle	102	7.173	0.000713283	3087,332,8317,22974,11011,220042,9656,203,56992,8493,81620,79791,9918,79980,10628,11004,55198,9055,81610,23397,113130,7042,10083,348235,1841,1647,51512,5699,54069,84722,92335,55872,890,4176,699,6277,323,1111,3832,2305,1063,3014,1778,9232,996,57405,994,995,1058,83540,993,991,151246,891,898,11258,64151,196,10381,10300,701,5889,3576,259266,3306,301,5603,6839,5705,632,5608,9212,8452,5499,4751,586,105…	1049	687	9658	1.36696	0.916398	0.0793936	1.29751
GOTERM_BP_FAT	GO:0051301~cell division	46	3.23488	0.00146285	1.12589e+195	1049	265	9658	1.59817	0.993851	0.11952	2.64386
Annotation Cluster 4	Enrichment Score: 4.231685044858065
Category	Term	Count	%	PValue	Genes	List Total	Pop Hits	Pop Total	Fold Enrichment	Bonferroni	Benjamini	FDR
GOTERM_MF_FAT	GO:0004857~enzyme inhibitor activity	54	3.79747	4.78699e-11	2810,332,3827,5635,197,6590,10614,94274,3053,57761,5266,5269,340267,831,301,5176,306,307,3309,51232,6692,27329,2,10628,7980,5502,8826,7076,7079,871,5104,1028,3843,1027,81706,1026,2873,1030,6906,3698,3697,51347,5566,5345,9232,462,5570,25816,718,183,9467,5858,124790,710	994	192	9211	2.60623	5.59599e-08	5.59599e-08	7.71377e-08
GOTERM_MF_FAT	GO:0004866~endopeptidase inhibitor activity	30	2.1097	6.7539e-08	5104,3827,332,197,6590,6906,3698,3697,3053,5266,5269,340267,831,5176,5345,3309,51232,9232,462,2,6692,25816,7980,718,183,7076,7079,5858,710,871	994	93	9211	2.98923	7.89499e-05	3.94757e-05	0.000108832
GOTERM_MF_FAT	GO:0030414~peptidase inhibitor activity	30	2.1097	1.13594e-07	5104,3827,332,197,6590,6906,3698,3697,3053,5266,5269,340267,831,5176,5345,3309,51232,9232,462,2,6692,25816,7980,718,183,7076,7079,5858,710,871	994	95	9211	2.92629	0.000132783	4.4263e-05	0.000183046
GOTERM_MF_FAT	GO:0004867~serine-type endopeptidase inhibitor activity	20	1.40647	7.30248e-06	5269,340267,5104,5176,5345,6590,51232,462,2,6692,7980,6906,183,3698,3697,3053,5858,710,871,5266	994	59	9211	3.14122	0.0085003	0.00213188	0.0117666
SP_PIR_KEYWORDS	protease inhibitor	18	1.26582	0.000307012	5269,340267,831,5104,332,3827,5345,6590,462,2,6692,7980,3698,3697,3053,5858,710,5266	1397	65	13223	2.62116	0.180932	0.0164948	0.457419
SP_PIR_KEYWORDS	Serine protease inhibitor	15	1.05485	0.000385053	5269,340267,5104,5345,6590,462,6692,2,7980,3698,3697,3053,5858,710,5266	1397	49	13223	2.89754	0.221458	0.0190721	0.573382
SMART	SM00093:SERPIN	10	0.703235	0.0030042	4.62527e+35	692	30	6501	3.1315	0.622742	0.216282	3.9861
INTERPRO	IPR000215:Protease inhibitor I4, serpin	10	0.703235	0.00303158	4.62527e+35	1250	30	11754	3.1344	0.995251	0.534318	5.01293
PIR_SUPERFAMILY	PIRSF001630:serpin	9	0.632911	0.00756316	4.62527e+32	589	26	5036	2.95964	0.991565	0.908155	10.6716
SP_PIR_KEYWORDS	serine proteinase inhibitor	7	0.492264	0.0144409	4.62527e+26	1397	20	13223	3.31285	0.999922	0.225502	19.5222
UP_SEQ_FEATURE	site:Reactive bond	7	0.492264	0.0896705	4.62527e+25	1395	30	13210	2.20956	1	0.998754	82.0951
Annotation Cluster 5	Enrichment Score: 3.5961332627657385
Category	Term	Count	%	PValue	Genes	List Total	Pop Hits	Pop Total	Fold Enrichment	Bonferroni	Benjamini	FDR
GOTERM_CC_FAT	GO:0031012~extracellular matrix	48	3.37553	3.96833e-06	4.14841e+206	1000	212	8798	1.992	0.00203765	0.000509801	0.00573659
GOTERM_CC_FAT	GO:0005578~proteinaceous extracellular matrix	44	3.09423	1.02323e-05	4.14841e+189	1000	194	8798	1.99542	0.00524561	0.00105133	0.0147911
SP_PIR_KEYWORDS	extracellular matrix	30	2.1097	0.000457659	2.27953e+130	1397	144	13223	1.97193	0.257362	0.021029	0.681155
GOTERM_CC_FAT	GO:0044420~extracellular matrix part	19	1.33615	0.00482155	1.28034e+84	1000	83	8798	2.014	0.916614	0.143813	6.74854
GOTERM_CC_FAT	GO:0005604~basement membrane	14	0.984529	0.0116688	1.28034e+63	1000	58	8798	2.12366	0.997602	0.239841	15.6065
Annotation Cluster 6	Enrichment Score: 2.7475284633113946
Category	Term	Count	%	PValue	Genes	List Total	Pop Hits	Pop Total	Fold Enrichment	Bonferroni	Benjamini	FDR
GOTERM_BP_FAT	GO:0007155~cell adhesion	73	5.13361	0.000189144	1.02053e+304	1049	439	9658	1.53098	0.482065	0.034034	0.345628
GOTERM_BP_FAT	GO:0022610~biological adhesion	73	5.13361	0.000203131	1.02053e+304	1049	440	9658	1.5275	0.506662	0.0347113	0.371141
SP_PIR_KEYWORDS	cell adhesion	41	2.88326	0.00339581	1.02059e+177	1397	245	13223	1.58399	0.890412	0.0916557	4.95208
GOTERM_BP_FAT	GO:0016337~cell-cell adhesion	25	1.75809	0.0784104	1.0206e+100	1049	164	9658	1.40349	1	0.768668	77.565
Annotation Cluster 7	Enrichment Score: 2.699583096578043
Category	Term	Count	%	PValue	Genes	List Total	Pop Hits	Pop Total	Fold Enrichment	Bonferroni	Benjamini	FDR
GOTERM_BP_FAT	GO:0032101~regulation of response to external stimulus	28	1.96906	2.79151e-05	2147,7103,2149,3827,197,2877,2150,4907,2152,3576,3673,5154,55075,59272,1361,5176,5345,857,5468,1906,350,462,2,718,183,185,2161,710	1049	109	9658	2.36507	0.0925258	0.00966203	0.0510812
GOTERM_BP_FAT	GO:0030193~regulation of blood coagulation	13	0.914205	3.36113e-05	5.15421e+49	1049	30	9658	3.98964	0.110328	0.0105712	0.0615015
GOTERM_BP_FAT	GO:0050818~regulation of coagulation	14	0.984529	4.02112e-05	5.15421e+52	1049	35	9658	3.68275	0.130518	0.00994007	0.0735736
GOTERM_BP_FAT	GO:0050819~negative regulation of coagulation	9	0.632911	0.00280322	5.15421e+33	1049	24	9658	3.45257	0.999942	0.174228	5.00822
GOTERM_BP_FAT	GO:0030195~negative regulation of blood coagulation	8	0.562588	0.00513137	5.15421e+30	1049	21	9658	3.50738	1	0.26545	8.98647
GOTERM_BP_FAT	GO:0042730~fibrinolysis	3	0.21097	0.379981	214713612161	1049	12	9658	2.30172	1	0.983173	99.9841
GOTERM_BP_FAT	GO:0051241~negative regulation of multicellular organismal process	13	0.914205	0.614604	5.15421e+47	1049	116	9658	1.0318	1	0.997798	100
Annotation Cluster 8	Enrichment Score: 2.468230490840661
Category	Term	Count	%	PValue	Genes	List Total	Pop Hits	Pop Total	Fold Enrichment	Bonferroni	Benjamini	FDR
GOTERM_BP_FAT	GO:0050878~regulation of body fluid levels	26	1.82841	7.8391e-05	5.87321e+99	1049	103	9658	2.32406	0.238644	0.0168965	0.143383
GOTERM_BP_FAT	GO:0050817~coagulation	21	1.47679	0.000179783	5.87311e+78	1049	78	9658	2.47877	0.464922	0.0341447	0.328549
GOTERM_BP_FAT	GO:0007596~blood coagulation	21	1.47679	0.000179783	5.87311e+78	1049	78	9658	2.47877	0.464922	0.0341447	0.328549
GOTERM_BP_FAT	GO:0007599~hemostasis	21	1.47679	0.000369773	5.87311e+78	1049	82	9658	2.35786	0.723711	0.0543913	0.67464
GOTERM_BP_FAT	GO:0042060~wound healing	28	1.96906	0.00280349	5.87321e+105	1049	143	9658	1.80274	0.999943	0.171198	5.0087
SP_PIR_KEYWORDS	blood coagulation	10	0.703235	0.00885025	4.62798e+37	1397	35	13223	2.70437	0.996906	0.165206	12.4299
BIOCARTA	h_intrinsicPathway:Intrinsic Prothrombin Activation Pathway	7	0.492264	0.0145044	4.62215e+25	148	17	1152	3.20509	0.938618	0.938618	16.6189
UP_SEQ_FEATURE	site:Cleavage; by thrombin	4	0.281294	0.029624	2.14721e+15	1395	7	13210	5.41116	1	0.982301	42.3385
BIOCARTA	h_extrinsicPathway:Extrinsic Prothrombin Activation Pathway	5	0.351617	0.0408685	4.62215e+18	148	11	1152	3.53808	0.999654	0.981406	40.4921
BIOCARTA	h_amiPathway:Acute Myocardial Infarction	3	0.21097	0.509104	46221472149	148	13	1152	1.79626	1	0.999474	99.9857
Annotation Cluster 9	Enrichment Score: 2.298503734248016
Category	Term	Count	%	PValue	Genes	List Total	Pop Hits	Pop Total	Fold Enrichment	Bonferroni	Benjamini	FDR
INTERPRO	IPR016060:Complement control module	13	0.914205	0.000646379	3.25032e+54	1250	40	11754	3.05604	0.679953	0.315976	1.08927
SP_PIR_KEYWORDS	sushi	12	0.843882	0.00141894	3.25032e+49	1397	38	13223	2.98904	0.602661	0.0499834	2.0978
SMART	SM00032:CCP	12	0.843882	0.00147267	3.25032e+49	692	38	6501	2.96669	0.379665	0.379665	1.97276
INTERPRO	IPR000436:Sushi/SCR/CCP	12	0.843882	0.00149333	3.25032e+49	1250	38	11754	2.96943	0.928153	0.482271	2.49964
UP_SEQ_FEATURE	domain:Sushi 2	10	0.703235	0.00370307	3.25073e+41	1395	31	13210	3.05469	0.999998	0.725836	6.56695
UP_SEQ_FEATURE	domain:Sushi 1	10	0.703235	0.00370307	3.25073e+41	1395	31	13210	3.05469	0.999998	0.725836	6.56695
UP_SEQ_FEATURE	domain:Sushi 3	6	0.421941	0.0630624	2.64707e+22	1395	21	13210	2.70558	1	0.994927	69.6574
UP_SEQ_FEATURE	domain:Sushi 4	4	0.281294	0.23462	2.64703e+15	1395	16	13210	2.36738	1	0.999996	99.252
Annotation Cluster 10	Enrichment Score: 2.28842674663234
Category	Term	Count	%	PValue	Genes	List Total	Pop Hits	Pop Total	Fold Enrichment	Bonferroni	Benjamini	FDR
UP_SEQ_FEATURE	metal ion-binding site:Divalent metal cation; cluster A	5	0.351617	0.00155455	4.49545e+19	1395	6	13210	7.89128	0.995602	0.492527	2.80825
UP_SEQ_FEATURE	metal ion-binding site:Divalent metal cation; cluster B	5	0.351617	0.00155455	4.49545e+19	1395	6	13210	7.89128	0.995602	0.492527	2.80825
UP_SEQ_FEATURE	region of interest:Beta	5	0.351617	0.00155455	4.49545e+19	1395	6	13210	7.89128	0.995602	0.492527	2.80825
UP_SEQ_FEATURE	region of interest:Alpha	5	0.351617	0.00155455	4.49545e+19	1395	6	13210	7.89128	0.995602	0.492527	2.80825
SP_PIR_KEYWORDS	metal-thiolate cluster	5	0.351617	0.00155723	4.49545e+19	1397	6	13223	7.88774	0.636869	0.0519189	2.30005
INTERPRO	IPR003019:Metallothionein superfamily, eukaryotic	5	0.351617	0.00159569	4.49545e+19	1250	6	11754	7.836	0.940026	0.430371	2.66881
INTERPRO	IPR018064:Metallothionein, vertebrate, metal binding site	5	0.351617	0.00159569	4.49545e+19	1250	6	11754	7.836	0.940026	0.430371	2.66881
INTERPRO	IPR000006:Metallothionein, vertebrate	5	0.351617	0.00159569	4.49545e+19	1250	6	11754	7.836	0.940026	0.430371	2.66881
PIR_SUPERFAMILY	PIRSF002564:metallothionein	5	0.351617	0.00227447	4.49545e+19	589	6	5036	7.12507	0.761233	0.761233	3.32812
SP_PIR_KEYWORDS	chelation	4	0.281294	0.00432651	4.49545e+15	1397	4	13223	9.46528	0.940294	0.0991195	6.2688
SP_PIR_KEYWORDS	cadmium	4	0.281294	0.00432651	4.49545e+15	1397	4	13223	9.46528	0.940294	0.0991195	6.2688
GOTERM_MF_FAT	GO:0046870~cadmium ion binding	4	0.281294	0.00459518	4.49545e+15	994	4	9211	9.2666	0.995411	0.361529	7.15303
SP_PIR_KEYWORDS	copper	8	0.562588	0.177155	5.06627e+32	1397	44	13223	1.72096	1	0.704378	94.5598
SP_PIR_KEYWORDS	metal binding	4	0.281294	0.177774	4.49545e+15	1397	14	13223	2.70437	1	0.702316	94.6206
GOTERM_MF_FAT	GO:0005507~copper ion binding	9	0.632911	0.207157	5.06627e+35	994	53	9211	1.57357	1	0.94595	97.6259
Annotation Cluster 11	Enrichment Score: 2.2602305186954386
Category	Term	Count	%	PValue	Genes	List Total	Pop Hits	Pop Total	Fold Enrichment	Bonferroni	Benjamini	FDR
GOTERM_CC_FAT	GO:0031226~intrinsic to plasma membrane	108	7.59494	0.00181891	5168,6558,2149,8743,10991,9143,8323,6768,7162,2150,6616,2152,1184,4688,6091,3710,27075,3685,9056,9057,25780,8869,2842,9052,732,6752,26872,4224,6578,9369,56172,928,729,5349,3696,6583,51280,10314,5245,8560,290,8754,10280,182,185,7107,1836,23596,115,9514,11254,6519,56301,7301,8842,4071,10652,1244,10381,432,5587,780,977,27035,1948,6505,7976,634,2264,975,1942,8455,9213,3643,10050,2569,3249,10267,967,9…	1000	722	8798	1.31604	0.607717	0.0987517	2.59754
GOTERM_CC_FAT	GO:0044459~plasma membrane part	195	13.7131	0.0024135	10347,55742,8743,10991,1312,3728,7168,8323,3927,3485,6768,7162,65059,6616,1829,1184,1182,92359,6091,3710,6092,153562,8029,27075,3918,25780,1811,8869,2842,115677,732,6752,4224,10226,928,4640,729,5349,64284,224,5243,54874,51280,10314,5245,8754,3936,1832,182,185,1836,6102,85358,115,56301,3382,8842,10652,4071,4072,10381,432,27035,977,223082,301,7976,2264,309,975,6198,8455,9213,23363,4646,23682,10050,…	1000	1427	8798	1.20225	0.711206	0.1168	3.43295
GOTERM_CC_FAT	GO:0005887~integral to plasma membrane	105	7.38397	0.00272797	5168,6558,2149,8743,10991,9143,8323,6768,7162,2150,6616,1184,4688,6091,3710,27075,3685,9056,9057,25780,8869,2842,9052,732,6752,26872,4224,6578,9369,56172,928,729,5349,3696,6583,51280,10314,5245,8560,290,10280,182,185,7107,1836,23596,115,9514,11254,6519,56301,7301,8842,4071,10652,1244,10381,432,5587,780,977,27035,1948,6505,634,7976,2264,975,1942,8455,9213,3643,10050,2569,3249,10267,967,3561,965,12…	1000	707	8798	1.30663	0.75441	0.119834	3.87207
UP_SEQ_FEATURE	topological domain:Extracellular	167	11.744	0.0142147	10347,219699,392617,10205,2149,64115,64116,8743,91862,203413,8323,6768,7162,2150,2152,1829,55028,92359,6091,80731,3710,6092,51090,153562,9543,27075,51232,57211,28513,3685,5359,9057,2842,90139,9052,1000,6752,4224,9369,7103,56172,10673,928,6809,344838,5349,151258,3696,6583,6584,54682,89872,9429,83742,51704,57549,8754,25994,10280,57685,51313,491,23432,182,84873,26470,9766,185,84918,7107,5817,1836,64…	1395	1342	13210	1.1784	1	0.971757	23.0584
GOTERM_CC_FAT	GO:0005886~plasma membrane	278	19.5499	0.0293637	10347,6774,55742,10991,8743,1312,3728,203413,7168,8323,3927,3485,6768,7162,1829,65059,6616,203,1184,8875,8876,92359,1182,3710,6091,6092,153562,8029,27075,57211,3918,28513,5359,8727,25780,1811,1490,8869,115677,2842,732,6752,824,4224,10226,130576,928,312,4640,8766,729,51196,5349,6476,8853,64284,224,5243,54874,5245,10314,51280,8754,124935,3936,1832,182,84873,185,6102,1836,85358,115,3386,56301,51678,…	1000	2220	8798	1.10173	1	0.445224	35.0043
Annotation Cluster 12	Enrichment Score: 2.19050236169313
Category	Term	Count	%	PValue	Genes	List Total	Pop Hits	Pop Total	Fold Enrichment	Bonferroni	Benjamini	FDR
GOTERM_BP_FAT	GO:0007584~response to nutrient	26	1.82841	0.000839918	6752,2934,2628,1030,4277,3485,1543,6476,3673,5154,3158,8029,652,632,650,6256,857,5468,4982,462,2180,2,6198,9314,3643,898	1049	119	9658	2.01158	0.946199	0.0899656	1.52619
GOTERM_BP_FAT	GO:0033273~response to vitamin	15	1.05485	0.00252265	3.67352e+55	1049	57	9658	2.42286	0.999847	0.170483	4.51785
GOTERM_BP_FAT	GO:0009991~response to extracellular stimulus	32	2.25035	0.0060862	6752,2934,2628,1026,1030,4277,432,3485,1543,3655,6476,3673,5154,3291,81788,8029,3158,652,650,6256,632,857,3309,5468,4982,462,2180,2,6198,9314,3643,898	1049	180	9658	1.63678	1	0.286108	10.5721
GOTERM_BP_FAT	GO:0033189~response to vitamin A	10	0.703235	0.00860714	5.15443e+37	1049	34	9658	2.7079	1	0.345219	14.6338
GOTERM_BP_FAT	GO:0031667~response to nutrient levels	29	2.03938	0.0116507	6752,2934,2628,1030,4277,3485,1543,6476,3673,5154,3291,81788,8029,3158,652,632,650,6256,857,3309,5468,4982,462,2180,2,6198,9314,3643,898	1049	166	9658	1.60843	1	0.406996	19.3053
GOTERM_BP_FAT	GO:0032526~response to retinoic acid	7	0.492264	0.0556331	5.15443e+25	1049	26	9658	2.47877	1	0.700775	64.925
Annotation Cluster 13	Enrichment Score: 2.114770232244744
Category	Term	Count	%	PValue	Genes	List Total	Pop Hits	Pop Total	Fold Enrichment	Bonferroni	Benjamini	FDR
SMART	SM00214:VWC	8	0.562588	0.00333138	1.28035e+32	692	20	6501	3.7578	0.660801	0.194453	4.41121
INTERPRO	IPR001007:von Willebrand factor, type C	8	0.562588	0.00335074	1.28035e+32	1250	20	11754	3.76128	0.997298	0.522523	5.52669
UP_SEQ_FEATURE	domain:VWFC	5	0.351617	0.0405439	1.28035e+20	1395	13	13210	3.64213	1	0.987408	53.1295
Annotation Cluster 14	Enrichment Score: 2.1032915134618904
Category	Term	Count	%	PValue	Genes	List Total	Pop Hits	Pop Total	Fold Enrichment	Bonferroni	Benjamini	FDR
SMART	SM00276:GLECT	5	0.351617	0.00623848	3.9564e+20	692	8	6501	5.87157	0.868349	0.25148	8.11267
INTERPRO	IPR001079:Galectin, carbohydrate recognition domain	5	0.351617	0.00624876	3.9564e+20	1250	8	11754	5.877	0.999984	0.601642	10.0736
UP_SEQ_FEATURE	region of interest:Beta-galactoside binding	4	0.281294	0.00995361	3.9564e+15	1395	5	13210	7.57563	1	0.945398	16.7359
UP_SEQ_FEATURE	domain:Galectin	4	0.281294	0.00995361	3.95629e+16	1395	5	13210	7.57563	1	0.945398	16.7359
Annotation Cluster 15	Enrichment Score: 2.0849456454387334
Category	Term	Count	%	PValue	Genes	List Total	Pop Hits	Pop Total	Fold Enrichment	Bonferroni	Benjamini	FDR
GOTERM_MF_FAT	GO:0030246~carbohydrate binding	38	2.67229	0.00360961	5.16865e+158	994	219	9211	1.6079	0.985408	0.374808	5.66054
GOTERM_MF_FAT	GO:0008201~heparin binding	17	1.1955	0.00415354	5.10438e+68	994	73	9211	2.15798	0.992293	0.385263	6.48699
GOTERM_MF_FAT	GO:0005539~glycosaminoglycan binding	20	1.40647	0.00552004	5.10438e+81	994	95	9211	1.95086	0.998452	0.392106	8.53341
GOTERM_MF_FAT	GO:0001871~pattern binding	21	1.47679	0.00564867	5.16851e+85	994	102	9211	1.90783	0.998669	0.376871	8.72387
GOTERM_MF_FAT	GO:0030247~polysaccharide binding	21	1.47679	0.00564867	5.16851e+85	994	102	9211	1.90783	0.998669	0.376871	8.72387
SP_PIR_KEYWORDS	heparin-binding	9	0.632911	0.117115	2.65775e+35	1397	47	13223	1.8125	1	0.614232	84.4297
Annotation Cluster 16	Enrichment Score: 2.04731160992529
Category	Term	Count	%	PValue	Genes	List Total	Pop Hits	Pop Total	Fold Enrichment	Bonferroni	Benjamini	FDR
SMART	SM00042:CUB	11	0.773558	0.00513218	2.65778e+48	692	38	6501	2.71946	0.811208	0.242591	6.72
INTERPRO	IPR000859:CUB	11	0.773558	0.00518267	2.65778e+48	1250	38	11754	2.72198	0.999894	0.564965	8.42543
UP_SEQ_FEATURE	domain:CUB 2	8	0.562588	0.0155937	2.65773e+34	1395	26	13210	2.9137	1	0.944158	25.0053
UP_SEQ_FEATURE	domain:CUB 1	8	0.562588	0.0155937	2.65773e+34	1395	26	13210	2.9137	1	0.944158	25.0053
Annotation Cluster 17	Enrichment Score: 2.0178306445106062
Category	Term	Count	%	PValue	Genes	List Total	Pop Hits	Pop Total	Fold Enrichment	Bonferroni	Benjamini	FDR
SMART	SM00018:PD	5	0.351617	0.00159252	7.0327e+19	692	6	6501	7.82876	0.403328	0.227554	2.13171
INTERPRO	IPR000519:P-type trefoil	5	0.351617	0.00159569	7.0327e+19	1250	6	11754	7.836	0.940026	0.430371	2.66881
INTERPRO	IPR017957:P-type trefoil, conserved site	4	0.281294	0.0101493	7.0327e+15	1250	5	11754	7.52256	1	0.749086	15.869
UP_SEQ_FEATURE	domain:P-type 1	3	0.21097	0.0310401	703289726476	1395	3	13210	9.46953	1	0.974425	43.8598
UP_SEQ_FEATURE	domain:P-type 2	3	0.21097	0.0310401	703289726476	1395	3	13210	9.46953	1	0.974425	43.8598
INTERPRO	IPR017994:P-type trefoil, chordata	3	0.21097	0.0314558	703270337031	1250	3	11754	9.4032	1	0.885363	41.8058
Annotation Cluster 18	Enrichment Score: 2.0017233399084358
Category	Term	Count	%	PValue	Genes	List Total	Pop Hits	Pop Total	Fold Enrichment	Bonferroni	Benjamini	FDR
GOTERM_BP_FAT	GO:0046942~carboxylic acid transport	25	1.75809	0.000521072	6.57811e+109	1049	109	9658	2.11167	0.836797	0.0649351	0.94944
GOTERM_BP_FAT	GO:0015849~organic acid transport	25	1.75809	0.0005995	6.57811e+109	1049	110	9658	2.09247	0.875778	0.0717821	1.0916
GOTERM_BP_FAT	GO:0006865~amino acid transport	16	1.12518	0.00468316	2.34811e+72	1049	67	9658	2.19865	1	0.256838	8.23306
SP_PIR_KEYWORDS	amino-acid transport	9	0.632911	0.00535252	9.05655e+43	1397	27	13223	3.15509	0.969453	0.113339	7.70065
GOTERM_MF_FAT	GO:0005275~amine transmembrane transporter activity	12	0.843882	0.00982756	9.05655e+53	994	47	9211	2.36594	0.99999	0.473446	14.7127
GOTERM_MF_FAT	GO:0015171~amino acid transmembrane transporter activity	10	0.703235	0.0278496	9.05655e+45	994	41	9211	2.26015	1	0.692481	36.5639
GOTERM_BP_FAT	GO:0015837~amine transport	16	1.12518	0.0291396	2.34811e+72	1049	82	9658	1.79646	1	0.555084	41.7992
GOTERM_BP_FAT	GO:0015807~L-amino acid transport	5	0.351617	0.0869701	6.50565e+22	1049	16	9658	2.87714	1	0.791244	81.0874
GOTERM_MF_FAT	GO:0015179~L-amino acid transmembrane transporter activity	6	0.421941	0.177659	6.50565e+27	994	28	9211	1.9857	1	0.944667	95.7229
Annotation Cluster 29	Enrichment Score: 1.737423219195097
Category	Term	Count	%	PValue	Genes	List Total	Pop Hits	Pop Total	Fold Enrichment	Bonferroni	Benjamini	FDR
GOTERM_BP_FAT	GO:0050954~sensory perception of mechanical stimulus	20	1.40647	0.000253989	1.28037e+86	1049	74	9658	2.48834	0.58666	0.041198	0.463859
GOTERM_BP_FAT	GO:0007605~sensory perception of sound	19	1.33615	0.000433164	1.2801e+82	1049	71	9658	2.46381	0.778398	0.0608559	0.789864
SP_PIR_KEYWORDS	deafness	14	0.984529	0.0368638	9.77128e+59	1397	72	13223	1.84047	1	0.36372	42.9256
SP_PIR_KEYWORDS	Hearing	5	0.351617	0.06547	1.00832e+24	1397	15	13223	3.15509	1	0.491919	63.6145
SP_PIR_KEYWORDS	non-syndromic deafness	7	0.492264	0.0785371	1.6871e+32	1397	29	13223	2.28472	1	0.517267	70.5138
GOTERM_BP_FAT	GO:0007600~sensory perception	37	2.60197	0.129024	7.10111e+159	1049	274	9658	1.24326	1	0.86492	92.0215
GOTERM_BP_FAT	GO:0050890~cognition	42	2.95359	0.255966	7.10111e+179	1049	341	9658	1.13398	1	0.958568	99.5536
Annotation Cluster 30	Enrichment Score: 1.7364324451494937
Category	Term	Count	%	PValue	Genes	List Total	Pop Hits	Pop Total	Fold Enrichment	Bonferroni	Benjamini	FDR
GOTERM_BP_FAT	GO:0007059~chromosome segregation	18	1.26582	0.00272363	2.21151e+83	1049	76	9658	2.18057	0.999924	0.176001	4.86935
SP_PIR_KEYWORDS	kinetochore	15	1.05485	0.00277865	1.12582e+68	1397	59	13223	2.40643	0.836123	0.082521	4.06945
GOTERM_CC_FAT	GO:0000779~condensed chromosome, centromeric region	16	1.12518	0.00386513	1.12582e+73	1000	63	8798	2.23441	0.863376	0.141971	5.44455
GOTERM_CC_FAT	GO:0000793~condensed chromosome	24	1.68776	0.0071151	1.12582e+107	1000	119	8798	1.77439	0.97453	0.175658	9.80768
GOTERM_CC_FAT	GO:0000777~condensed chromosome kinetochore	14	0.984529	0.00738613	1.12582e+63	1000	55	8798	2.23949	0.977864	0.173477	10.1629
GOTERM_CC_FAT	GO:0000775~chromosome, centromeric region	23	1.61744	0.0104394	1.12586e+105	1000	116	8798	1.74443	0.995457	0.226524	14.0762
GOTERM_CC_FAT	GO:0000776~kinetochore	15	1.05485	0.0370108	1.12582e+68	1000	74	8798	1.78338	1	0.487488	42.027
GOTERM_CC_FAT	GO:0044427~chromosomal part	37	2.60197	0.559267	1.12586e+167	1000	321	8798	1.0141	1	0.981181	99.9993
GOTERM_CC_FAT	GO:0005694~chromosome	42	2.95359	0.709153	1.12586e+188	1000	387	8798	0.954822	1	0.992137	100
Annotation Cluster 31	Enrichment Score: 1.7298818141795704
Category	Term	Count	%	PValue	Genes	List Total	Pop Hits	Pop Total	Fold Enrichment	Bonferroni	Benjamini	FDR
GOTERM_CC_FAT	GO:0031983~vesicle lumen	12	0.843882	0.00318207	7060,7042,2,5154,1675,7076,5345,710,1950,290,2153,7044	1000	39	8798	2.70708	0.805669	0.127608	4.50291
GOTERM_CC_FAT	GO:0030141~secretory granule	26	1.82841	0.00497245	5066,5873,653808,928,10272,6809,1950,3382,51083,7060,7042,80763,3074,2153,7044,4922,7033,5154,4688,5345,2,1675,7076,710,1535,5125	1000	129	8798	1.77324	0.922866	0.13991	6.95274
GOTERM_CC_FAT	GO:0060205~cytoplasmic membrane-bounded vesicle lumen	11	0.773558	0.00672994	7060,7042,2,5154,1675,7076,5345,710,1950,2153,7044	1000	37	8798	2.61562	0.96891	0.175375	9.30057
GOTERM_CC_FAT	GO:0031093~platelet alpha granule lumen	10	0.703235	0.0139266	7060,7042,2,1675,7076,5345,710,1950,2153,7044	1000	35	8798	2.51371	0.99926	0.259447	18.3512
GOTERM_CC_FAT	GO:0031091~platelet alpha granule	11	0.773558	0.0168771	7060,7042,2,1675,928,7076,5345,710,1950,2153,7044	1000	42	8798	2.30424	0.999841	0.295279	21.8127
GOTERM_CC_FAT	GO:0044433~cytoplasmic vesicle part	21	1.47679	0.173792	5873,1601,5154,653808,928,858,5345,1950,3382,80223,7060,7042,2,9182,1675,1212,4646,7076,710,2153,7044	1000	141	8798	1.31034	1	0.832057	93.6698
GOTERM_CC_FAT	GO:0016023~cytoplasmic membrane-bounded vesicle	56	3.93812	0.178798	5066,2098,5538,191,51083,3382,7060,9143,2153,10133,4922,7033,4688,5176,8029,3309,309,80223,2,4646,134957,23682,7076,55704,115677,5125,5873,1601,822,653808,10272,928,6809,1950,8766,7042,80763,4908,3074,7044,4323,5154,54874,326624,858,5345,9182,115827,1675,54843,1212,10287,397,710,10457,1535	1000	428	8798	1.15114	1	0.830742	94.2022
Annotation Cluster 32	Enrichment Score: 1.6837858676001076
Category	Term	Count	%	PValue	Genes	List Total	Pop Hits	Pop Total	Fold Enrichment	Bonferroni	Benjamini	FDR
GOTERM_BP_FAT	GO:0001525~angiogenesis	22	1.54712	0.00848419	2.70357e+84	1049	112	9658	1.80849	1	0.345145	14.4398
GOTERM_BP_FAT	GO:0048514~blood vessel morphogenesis	28	1.96906	0.0163964	6.88361e+108	1049	163	9658	1.58155	1	0.454065	26.11
GOTERM_BP_FAT	GO:0001944~vasculature development	31	2.18003	0.032459	6.88361e+120	1049	196	9658	1.45619	1	0.578061	45.3356
GOTERM_BP_FAT	GO:0001568~blood vessel development	30	2.1097	0.0407534	6.88361e+116	1049	192	9658	1.43857	1	0.62385	53.3054
Annotation Cluster 33	Enrichment Score: 1.6829648970052047
Category	Term	Count	%	PValue	Genes	List Total	Pop Hits	Pop Total	Fold Enrichment	Bonferroni	Benjamini	FDR
PIR_SUPERFAMILY	PIRSF002359:annexin I	5	0.351617	0.00875339	301306312307309	589	8	5036	5.3438	0.996035	0.841718	12.2509
SP_PIR_KEYWORDS	endonexin fold	5	0.351617	0.0100777	301306312307309	1397	9	13223	5.25849	0.998617	0.176044	14.0352
SP_PIR_KEYWORDS	phospholipid binding	7	0.492264	0.0144409	3.01307e+22	1397	20	13223	3.31285	0.999922	0.225502	19.5222
UP_SEQ_FEATURE	repeat:Annexin 4	5	0.351617	0.0153849	301306312307309	1395	10	13210	4.73477	1	0.950432	24.7135
UP_SEQ_FEATURE	repeat:Annexin 1	5	0.351617	0.0153849	301306312307309	1395	10	13210	4.73477	1	0.950432	24.7135
UP_SEQ_FEATURE	repeat:Annexin 3	5	0.351617	0.0153849	301306312307309	1395	10	13210	4.73477	1	0.950432	24.7135
UP_SEQ_FEATURE	repeat:Annexin 2	5	0.351617	0.0153849	301306312307309	1395	10	13210	4.73477	1	0.950432	24.7135
SP_PIR_KEYWORDS	annexin	5	0.351617	0.0154089	301306312307309	1397	10	13223	4.73264	0.999959	0.228033	20.6943
SP_PIR_KEYWORDS	calcium/phospholipid-binding	5	0.351617	0.0154089	301306312307309	1397	10	13223	4.73264	0.999959	0.228033	20.6943
SMART	SM00335:ANX	5	0.351617	0.0157334	301306312307309	692	10	6501	4.69725	0.994131	0.434986	19.2977
INTERPRO	IPR018502:Annexin repeat	5	0.351617	0.0157543	301306312307309	1250	10	11754	4.7016	1	0.807158	23.5844
INTERPRO	IPR001464:Annexin	5	0.351617	0.0157543	301306312307309	1250	10	11754	4.7016	1	0.807158	23.5844
INTERPRO	IPR018252:Annexin repeat, conserved site	5	0.351617	0.0157543	301306312307309	1250	10	11754	4.7016	1	0.807158	23.5844
GOTERM_MF_FAT	GO:0004859~phospholipase inhibitor activity	4	0.281294	0.0841588	27329301306307	994	10	9211	3.70664	1	0.866691	75.7468
GOTERM_MF_FAT	GO:0005544~calcium-dependent phospholipid binding	5	0.351617	0.0853177	301306312307309	994	16	9211	2.89581	1	0.865313	76.2366
GOTERM_MF_FAT	GO:0055102~lipase inhibitor activity	4	0.281294	0.157891	27329301306307	994	13	9211	2.85126	1	0.936193	93.7283
Annotation Cluster 34	Enrichment Score: 1.6183321581222632
Category	Term	Count	%	PValue	Genes	List Total	Pop Hits	Pop Total	Fold Enrichment	Bonferroni	Benjamini	FDR
GOTERM_MF_FAT	GO:0005520~insulin-like growth factor binding	7	0.492264	0.00917206	3.49135e+28	994	18	9211	3.60368	0.999979	0.469335	13.7983
UP_SEQ_FEATURE	domain:IGFBP N-terminal	6	0.421941	0.011511	3.49135e+24	1395	14	13210	4.05837	1	0.955238	19.1016
SMART	SM00211:TY	6	0.421941	0.0118146	4.07248e+24	692	14	6501	4.02622	0.978736	0.382045	14.8437
SMART	SM00121:IB	6	0.421941	0.0118146	3.49135e+24	692	14	6501	4.02622	0.978736	0.382045	14.8437
INTERPRO	IPR000716:Thyroglobulin type-1	6	0.421941	0.0118426	4.07248e+24	1250	14	11754	4.02994	1	0.753259	18.2739
INTERPRO	IPR000867:Insulin-like growth factor-binding protein, IGFBP	6	0.421941	0.0118426	3.49135e+24	1250	14	11754	4.02994	1	0.753259	18.2739
INTERPRO	IPR017891:Insulin-like growth factor binding protein, N-terminal	5	0.351617	0.0157543	3.49135e+19	1250	10	11754	4.7016	1	0.807158	23.5844
GOTERM_MF_FAT	GO:0019838~growth factor binding	15	1.05485	0.0250933	1280,5154,3561,3489,3487,2264,51232,2,3491,3485,3977,1490,4908,3643,1278	994	74	9211	1.87836	1	0.667233	33.6027
UP_SEQ_FEATURE	domain:Thyroglobulin type-1	5	0.351617	0.030559	4.07248e+19	1395	12	13210	3.94564	1	0.976075	43.3472
BIOCARTA	h_ghrelinPathway:Ghrelin: Regulation of Food Intake and Energy Homeostasis	4	0.281294	0.0957739	9.77135e+15	148	9	1152	3.45946	1	0.99183	71.4167
SP_PIR_KEYWORDS	Growth factor binding	4	0.281294	0.125425	3.49135e+15	1397	12	13223	3.15509	1	0.624229	86.4801
INTERPRO	IPR009168:Insulin-like growth factor binding protein	3	0.21097	0.126758	348534893487	1250	6	11754	4.7016	1	0.986993	89.9332
Annotation Cluster 35	Enrichment Score: 1.5740900419085895
Category	Term	Count	%	PValue	Genes	List Total	Pop Hits	Pop Total	Fold Enrichment	Bonferroni	Benjamini	FDR
GOTERM_CC_FAT	GO:0000267~cell fraction	114	8.01688	0.0121537	2147,6558,1577,8743,9245,5538,3283,1312,3728,8673,288,284119,55379,7357,284111,8877,6616,4922,4199,2329,5446,2657,3291,3710,8029,27075,3918,6692,1811,2330,9050,6752,824,57552,4224,6578,440193,10673,6809,3034,51196,5139,3945,10516,91703,55075,95,51700,5243,8560,2592,5566,290,491,2180,183,10287,7107,1836,79644,9514,5577,8573,6519,4000,1244,977,128,5603,10237,6505,634,6507,30001,4259,7444,2517,2888,…	1000	816	8798	1.22913	0.998136	0.239115	16.2031
GOTERM_CC_FAT	GO:0005626~insoluble fraction	88	6.18847	0.0299564	79644,9514,6558,5577,6519,8573,1577,5538,9245,3283,1312,3728,4000,8673,288,284119,55379,7357,1244,8877,284111,6616,977,2329,5446,2657,3291,3710,10237,6505,8029,634,6507,30001,27075,7444,4259,2888,3918,157506,6692,6198,1559,1811,2330,9050,23682,3643,10050,56603,6752,824,57552,4224,6578,440193,966,762,6809,9123,5205,51196,1803,5139,8992,1543,4907,9120,91703,2348,55075,1733,5243,2346,5566,8560,858,8…	1000	632	8798	1.22504	1	0.43954	35.5756
GOTERM_CC_FAT	GO:0005624~membrane fraction	83	5.83685	0.0520634	79644,9514,6558,5577,1577,6519,8573,5538,9245,3283,1312,3728,8673,288,284119,55379,7357,1244,8877,6616,977,2329,5446,2657,3291,3710,10237,6505,8029,634,6507,30001,27075,7444,4259,2888,3918,157506,6692,6198,1559,1811,2330,9050,23682,3643,10050,56603,6752,57552,4224,6578,966,762,6809,9123,5205,51196,1803,8992,1543,4907,9120,91703,2348,55075,1733,5243,2346,5566,8560,858,857,5530,491,2180,3764,9133,5…	1000	609	8798	1.19907	1	0.57634	53.8349
Annotation Cluster 36	Enrichment Score: 1.5514743178157955
Category	Term	Count	%	PValue	Genes	List Total	Pop Hits	Pop Total	Fold Enrichment	Bonferroni	Benjamini	FDR
INTERPRO	IPR015894:Guanylate-binding protein, N-terminal	4	0.281294	0.0187028	2.63426e+16	1250	6	11754	6.2688	1	0.810492	27.3708
INTERPRO	IPR003191:Guanylate-binding protein, C-terminal	3	0.21097	0.0314558	263426332635	1250	3	11754	9.4032	1	0.885363	41.8058
PIR_SUPERFAMILY	PIRSF005552:guanine nucleotide-binding protein 1	3	0.21097	0.0376676	263426332635	589	3	5036	8.55008	1	0.992015	43.4889
Annotation Cluster 37	Enrichment Score: 1.545474230061499
Category	Term	Count	%	PValue	Genes	List Total	Pop Hits	Pop Total	Fold Enrichment	Bonferroni	Benjamini	FDR
GOTERM_BP_FAT	GO:0048545~response to steroid hormone stimulus	28	1.96906	0.00862691	6774,762,1026,51083,6790,7042,8835,6906,3485,4323,6476,5154,890,3291,652,858,6256,839,857,5468,8754,7031,4982,2,6198,10628,3643,898	1049	155	9658	1.66318	1	0.34199	14.6649
GOTERM_BP_FAT	GO:0051384~response to glucocorticoid stimulus	13	0.914205	0.0404681	3291,652,6256,857,8754,1026,2,6198,6906,3485,3643,898,6476	1049	64	9658	1.87014	1	0.623705	53.0506
GOTERM_BP_FAT	GO:0031960~response to corticosteroid stimulus	13	0.914205	0.0661621	3291,652,6256,857,8754,1026,2,6198,6906,3485,3643,898,6476	1049	69	9658	1.73463	1	0.731618	71.4324
Annotation Cluster 38	Enrichment Score: 1.5139570505743318
Category	Term	Count	%	PValue	Genes	List Total	Pop Hits	Pop Total	Fold Enrichment	Bonferroni	Benjamini	FDR
INTERPRO	IPR018503:Tetraspanin, conserved site	7	0.492264	0.0148754	9.7771e+25	1250	20	11754	3.29112	1	0.808037	22.4202
PIR_SUPERFAMILY	PIRSF002419:CD9 antigen	6	0.421941	0.017359	9.7771e+20	589	14	5036	3.66432	0.999984	0.936306	22.918
INTERPRO	IPR000301:Tetraspanin, subgroup	7	0.492264	0.029429	9.7771e+25	1250	23	11754	2.86184	1	0.88842	39.7082
INTERPRO	IPR018499:Tetraspanin	7	0.492264	0.0430407	9.7771e+25	1250	25	11754	2.6329	1	0.924524	52.5366
BBID	73.Integrins_and_other_cell-surface_receptors	4	0.281294	0.082332	977967928975	31	10	276	3.56129	0.941302	0.941302	52.761
Annotation Cluster 39	Enrichment Score: 1.4587353236874987
Category	Term	Count	%	PValue	Genes	List Total	Pop Hits	Pop Total	Fold Enrichment	Bonferroni	Benjamini	FDR
GOTERM_BP_FAT	GO:0032355~response to estradiol stimulus	12	0.843882	0.007345	8.83511e+44	1049	45	9658	2.45516	1	0.314126	12.6225
GOTERM_BP_FAT	GO:0048545~response to steroid hormone stimulus	28	1.96906	0.00862691	6774,762,1026,51083,6790,7042,8835,6906,3485,4323,6476,5154,890,3291,652,858,6256,839,857,5468,8754,7031,4982,2,6198,10628,3643,898	1049	155	9658	1.66318	1	0.34199	14.6649
GOTERM_BP_FAT	GO:0043627~response to estrogen stimulus	18	1.26582	0.0100744	5.15489e+67	1049	86	9658	1.92702	1	0.378673	16.9168
GOTERM_BP_FAT	GO:0009725~response to hormone stimulus	42	2.95359	0.0732219	115,6774,5577,762,2628,197,1026,283,51083,6790,7042,8835,6906,3485,8890,55970,6476,4323,4199,3673,5154,7033,3291,890,9734,5566,3158,652,858,857,6256,839,8754,5468,7031,4982,2,6198,10628,3643,7079,898	1049	301	9658	1.28468	1	0.753235	75.1371
GOTERM_BP_FAT	GO:0009719~response to endogenous stimulus	45	3.16456	0.0773289	115,6774,5577,762,2628,197,1026,283,51083,6790,7042,8835,6906,3485,8890,55970,8992,6476,4323,4199,3673,5154,7033,3291,890,9734,5566,3158,652,858,857,6256,839,8754,5468,7031,4982,5530,2774,2,6198,10628,3643,7079,898	1049	328	9658	1.26314	1	0.769047	77.0782
GOTERM_BP_FAT	GO:0043434~response to peptide hormone stimulus	20	1.40647	0.102983	7.03389e+77	1049	129	9658	1.42742	1	0.820599	86.3194
GOTERM_BP_FAT	GO:0010033~response to organic substance	71	4.99297	0.165212	115,6774,2149,5577,197,8575,1312,283,51083,8835,3485,9971,780,4199,3306,128,7033,3291,2806,839,6256,30001,7031,4982,64224,2,6198,10628,3491,2161,3643,58191,7079,871,2934,762,2628,1026,6790,7042,1030,6906,8890,55970,5139,8992,1543,130,6476,4323,1846,3673,5154,890,3158,5566,9734,652,858,5345,857,5468,8754,5530,2774,2180,3764,3977,567,898,999	1049	577	9658	1.13291	1	0.903165	96.3306
Annotation Cluster 40	Enrichment Score: 1.431551655518532
Category	Term	Count	%	PValue	Genes	List Total	Pop Hits	Pop Total	Fold Enrichment	Bonferroni	Benjamini	FDR
GOTERM_BP_FAT	GO:0051726~regulation of cell cycle	50	3.51617	0.00111137	2.81083e+201	1049	291	9658	1.58194	0.979089	0.101861	2.01471
GOTERM_BP_FAT	GO:0010564~regulation of cell cycle process	20	1.40647	0.00593222	8.16201e+78	1049	95	9658	1.93829	1	0.283781	10.3181
GOTERM_BP_FAT	GO:0007346~regulation of mitotic cell cycle	24	1.68776	0.0158278	8.16209e+94	1049	133	9658	1.66139	1	0.445847	25.3244
GOTERM_BP_FAT	GO:0051783~regulation of nuclear division	10	0.703235	0.0496094	9.95699e+36	1049	45	9658	2.04597	1	0.662333	60.5961
GOTERM_BP_FAT	GO:0007088~regulation of mitosis	10	0.703235	0.0496094	9.95699e+36	1049	45	9658	2.04597	1	0.662333	60.5961
GOTERM_BP_FAT	GO:0010638~positive regulation of organelle organization	13	0.914205	0.0603348	8.47226e+51	1049	68	9658	1.76014	1	0.717969	67.9872
GOTERM_BP_FAT	GO:0045787~positive regulation of cell cycle	10	0.703235	0.0628871	7.04241e+38	1049	47	9658	1.95891	1	0.722942	69.5419
GOTERM_BP_FAT	GO:0051785~positive regulation of nuclear division	5	0.351617	0.0869701	4.05032e+19	1049	16	9658	2.87714	1	0.791244	81.0874
GOTERM_BP_FAT	GO:0045840~positive regulation of mitosis	5	0.351617	0.0869701	4.05032e+19	1049	16	9658	2.87714	1	0.791244	81.0874
GOTERM_BP_FAT	GO:0051051~negative regulation of transport	11	0.773558	0.656133	5.76201e+49	1049	100	9658	1.01276	1	0.998664	100
Annotation Cluster 41	Enrichment Score: 1.427237682108914
Category	Term	Count	%	PValue	Genes	List Total	Pop Hits	Pop Total	Fold Enrichment	Bonferroni	Benjamini	FDR
GOTERM_MF_FAT	GO:0004860~protein kinase inhibitor activity	13	0.914205	0.000132291	2.81056e+55	994	34	9211	3.54311	0.143292	0.0304582	0.212961
GOTERM_MF_FAT	GO:0019210~kinase inhibitor activity	13	0.914205	0.000132291	2.81056e+55	994	34	9211	3.54311	0.143292	0.0304582	0.212961
GOTERM_MF_FAT	GO:0030291~protein serine/threonine kinase inhibitor activity	9	0.632911	0.000176725	5.5701e+38	994	17	9211	4.90585	0.186663	0.0338488	0.284395
GOTERM_MF_FAT	GO:0004861~cyclin-dependent protein kinase inhibitor activity	6	0.421941	0.00228266	1.03011e+26	994	10	9211	5.55996	0.93085	0.2839	3.61551
GOTERM_MF_FAT	GO:0019887~protein kinase regulator activity	16	1.12518	0.00587804	2.81085e+67	994	69	9211	2.14878	0.998984	0.368367	9.06256
GOTERM_BP_FAT	GO:0000079~regulation of cyclin-dependent protein kinase activity	13	0.914205	0.00721098	8.02793e+53	1049	51	9658	2.34685	1	0.313179	12.4064
GOTERM_MF_FAT	GO:0016538~cyclin-dependent protein kinase regulator activity	6	0.421941	0.0171975	1.03011e+26	994	15	9211	3.70664	1	0.602183	24.3863
GOTERM_BP_FAT	GO:0051348~negative regulation of transferase activity	17	1.1955	0.017342	2.8101e+74	1049	84	9658	1.86329	1	0.459138	27.3994
GOTERM_MF_FAT	GO:0019207~kinase regulator activity	16	1.12518	0.0181501	2.81085e+67	994	78	9211	1.90084	1	0.60583	25.5586
SP_PIR_KEYWORDS	protein kinase inhibitor	6	0.421941	0.0210539	5.5701e+24	1397	16	13223	3.54948	0.999999	0.275052	27.2188
INTERPRO	IPR003175:Cyclin-dependent kinase inhibitor	3	0.21097	0.0314558	102810271026	1250	3	11754	9.4032	1	0.885363	41.8058
GOTERM_BP_FAT	GO:0033673~negative regulation of kinase activity	15	1.05485	0.0395886	2.8101e+65	1049	78	9658	1.77055	1	0.620495	52.2566
GOTERM_BP_FAT	GO:0043086~negative regulation of catalytic activity	34	2.391	0.0417089	6.75212e+139	1049	224	9658	1.39747	1	0.627619	54.1494
GOTERM_BP_FAT	GO:0006469~negative regulation of protein kinase activity	14	0.984529	0.0587057	2.8101e+61	1049	75	9658	1.71861	1	0.709963	66.956
GOTERM_BP_FAT	GO:0044092~negative regulation of molecular function	39	2.74262	0.0694196	6.75212e+160	1049	275	9658	1.3057	1	0.745227	73.2023
SP_PIR_KEYWORDS	cyclin	9	0.632911	0.0779414	1.03091e+32	1397	43	13223	1.98111	1	0.519329	70.2278
GOTERM_BP_FAT	GO:0045736~negative regulation of cyclin-dependent protein kinase activity	4	0.281294	0.108425	1.06141e+18	1049	11	9658	3.34795	1	0.833029	87.7614
BBID	1.RBphosphoE2F	4	0.281294	0.156633	7.0831e+15	31	13	276	2.73945	0.996381	0.939844	77.3934
BIOCARTA	h_cellcyclePathway:Cyclins and Cell Cycle Regulation	6	0.421941	0.159319	1.03099e+20	148	23	1152	2.03055	1	0.996012	88.4534
BBID	26.cyclin-CDK_complexes	4	0.281294	0.214763	1.0301e+15	31	15	276	2.37419	0.999657	0.930015	87.8798
GOTERM_BP_FAT	GO:0050680~negative regulation of epithelial cell proliferation	4	0.281294	0.309563	7.0421e+15	1049	18	9658	2.04597	1	0.971533	99.8864
GOTERM_BP_FAT	GO:0042326~negative regulation of phosphorylation	6	0.421941	0.418885	1.03036e+22	1049	39	9658	1.41644	1	0.987605	99.9952
BIOCARTA	h_g1Pathway:Cell Cycle: G1/S Check Point	5	0.351617	0.428712	1.03099e+17	148	26	1152	1.49688	1	0.998748	99.9055
GOTERM_BP_FAT	GO:0045936~negative regulation of phosphate metabolic process	6	0.421941	0.484976	1.03036e+22	1049	42	9658	1.31527	1	0.992474	99.9995
GOTERM_BP_FAT	GO:0010563~negative regulation of phosphorus metabolic process	6	0.421941	0.484976	1.03036e+22	1049	42	9658	1.31527	1	0.992474	99.9995
GOTERM_BP_FAT	GO:0050678~regulation of epithelial cell proliferation	5	0.351617	0.818873	7.0421e+19	1049	51	9658	0.902634	1	0.999902	100
BIOCARTA	h_RacCycDPathway:Influence of Ras and Rho proteins on G1 to S Transition	3	0.21097	0.832604	10271026898	148	24	1152	0.972973	1	0.999992	100
Annotation Cluster 42	Enrichment Score: 1.3817398361231628
Category	Term	Count	%	PValue	Genes	List Total	Pop Hits	Pop Total	Fold Enrichment	Bonferroni	Benjamini	FDR
GOTERM_MF_FAT	GO:0005520~insulin-like growth factor binding	7	0.492264	0.00917206	3.49135e+28	994	18	9211	3.60368	0.999979	0.469335	13.7983
GOTERM_MF_FAT	GO:0031995~insulin-like growth factor II binding	3	0.21097	0.0600766	348534893643	994	4	9211	6.94995	1	0.829074	63.1522
GOTERM_MF_FAT	GO:0031994~insulin-like growth factor I binding	3	0.21097	0.1299	348534893643	994	6	9211	4.6333	1	0.92126	89.3777
Annotation Cluster 43	Enrichment Score: 1.3689433296905773
Category	Term	Count	%	PValue	Genes	List Total	Pop Hits	Pop Total	Fold Enrichment	Bonferroni	Benjamini	FDR
INTERPRO	IPR011106:Seven cysteines, N-terminal	3	0.21097	0.0314558	66928491854682	1250	3	11754	9.4032	1	0.885363	41.8058
SMART	SM00765:MANEC	3	0.21097	0.0314573	66928491854682	692	3	6501	9.39451	0.999968	0.549145	35.0874
UP_SEQ_FEATURE	domain:MANSC	3	0.21097	0.0577595	66928491854682	1395	4	13210	7.10215	1	0.993663	66.3542
INTERPRO	IPR013980:Seven cysteines	3	0.21097	0.0585034	66928491854682	1250	4	11754	7.0524	1	0.956026	63.9819
Annotation Cluster 44	Enrichment Score: 1.3629753975715524
Category	Term	Count	%	PValue	Genes	List Total	Pop Hits	Pop Total	Fold Enrichment	Bonferroni	Benjamini	FDR
GOTERM_MF_FAT	GO:0030246~carbohydrate binding	38	2.67229	0.00360961	5.16865e+158	994	219	9211	1.6079	0.985408	0.374808	5.66054
GOTERM_MF_FAT	GO:0005529~sugar binding	17	1.1955	0.139188	6.53808e+71	994	111	9211	1.41921	1	0.926837	91.0647
SP_PIR_KEYWORDS	Lectin	13	0.914205	0.162185	6.53808e+55	1397	83	13223	1.48251	1	0.690779	92.8792
Annotation Cluster 45	Enrichment Score: 1.3397920544523139
Category	Term	Count	%	PValue	Genes	List Total	Pop Hits	Pop Total	Fold Enrichment	Bonferroni	Benjamini	FDR
KEGG_PATHWAY	hsa00830:Retinol metabolism	10	0.703235	0.0194244	5.95916e+39	436	35	3618	2.3709	0.971287	0.693785	21.4816
KEGG_PATHWAY	hsa00982:Drug metabolism	11	0.773558	0.0239139	2.32929e+39	436	42	3618	2.17333	0.987487	0.665545	25.8006
SP_PIR_KEYWORDS	metalloprotein	14	0.984529	0.0948228	7.63128e+48	1397	83	13223	1.59655	1	0.56404	77.4061
KEGG_PATHWAY	hsa00980:Metabolism of xenobiotics by cytochrome P450	9	0.632911	0.0992937	2.93813e+32	436	40	3618	1.86709	1	0.741283	72.4538
Annotation Cluster 46	Enrichment Score: 1.325791426913364
Category	Term	Count	%	PValue	Genes	List Total	Pop Hits	Pop Total	Fold Enrichment	Bonferroni	Benjamini	FDR
GOTERM_BP_FAT	GO:0018904~organic ether metabolic process	11	0.773558	0.0125305	4.54751e+43	1049	42	9658	2.41132	1	0.418088	20.6099
GOTERM_BP_FAT	GO:0006639~acylglycerol metabolic process	10	0.703235	0.0180474	4.54751e+39	1049	38	9658	2.42286	1	0.459344	28.3474
GOTERM_BP_FAT	GO:0006638~neutral lipid metabolic process	10	0.703235	0.0212723	4.54751e+39	1049	39	9658	2.36073	1	0.484079	32.5344
GOTERM_BP_FAT	GO:0006662~glycerol ether metabolic process	10	0.703235	0.0248913	4.54751e+39	1049	40	9658	2.30172	1	0.518363	36.9572
GOTERM_BP_FAT	GO:0046463~acylglycerol biosynthetic process	4	0.281294	0.0649252	5.11968e+17	1049	9	9658	4.09194	1	0.728644	70.7318
GOTERM_BP_FAT	GO:0046460~neutral lipid biosynthetic process	4	0.281294	0.0649252	5.11968e+17	1049	9	9658	4.09194	1	0.728644	70.7318
GOTERM_BP_FAT	GO:0006641~triglyceride metabolic process	8	0.562588	0.0688651	4.54766e+31	1049	34	9658	2.16632	1	0.744239	72.9085
GOTERM_BP_FAT	GO:0046504~glycerol ether biosynthetic process	4	0.281294	0.0854963	5.11968e+17	1049	10	9658	3.68275	1	0.788644	80.5208
GOTERM_BP_FAT	GO:0046486~glycerolipid metabolic process	17	1.1955	0.393422	3.47736e+71	1049	135	9658	1.15938	1	0.985002	99.9894
Annotation Cluster 47	Enrichment Score: 1.2687248433208391
Category	Term	Count	%	PValue	Genes	List Total	Pop Hits	Pop Total	Fold Enrichment	Bonferroni	Benjamini	FDR
UP_SEQ_FEATURE	nucleotide phosphate-binding region:NADP	12	0.843882	0.0301953	4.19923e+52	1395	56	13210	2.02919	1	0.97806	42.9568
SP_PIR_KEYWORDS	nadp	20	1.40647	0.07009	4.19923e+84	1397	126	13223	1.50243	1	0.505883	66.2097
GOTERM_MF_FAT	GO:0050661~NADP or NADPH binding	7	0.492264	0.0738296	4.19923e+27	994	28	9211	2.31665	1	0.863635	70.9426
Annotation Cluster 48	Enrichment Score: 1.2592535522955892
Category	Term	Count	%	PValue	Genes	List Total	Pop Hits	Pop Total	Fold Enrichment	Bonferroni	Benjamini	FDR
GOTERM_BP_FAT	GO:0006928~cell motion	54	3.79747	0.00252263	5.16822e+220	1049	333	9658	1.493	0.999847	0.173845	4.5178
GOTERM_BP_FAT	GO:0016477~cell migration	29	2.03938	0.0945057	7.1018e+119	1049	200	9658	1.335	1	0.808341	83.7493
GOTERM_BP_FAT	GO:0051674~localization of cell	29	2.03938	0.196263	7.1018e+119	1049	218	9658	1.22477	1	0.927218	98.1665
GOTERM_BP_FAT	GO:0048870~cell motility	29	2.03938	0.196263	7.1018e+119	1049	218	9658	1.22477	1	0.927218	98.1665
Annotation Cluster 49	Enrichment Score: 1.259137209293024
Category	Term	Count	%	PValue	Genes	List Total	Pop Hits	Pop Total	Fold Enrichment	Bonferroni	Benjamini	FDR
GOTERM_BP_FAT	GO:0048477~oogenesis	8	0.562588	0.0144353	9.31999e+29	1049	25	9658	2.9462	1	0.437115	23.3666
GOTERM_BP_FAT	GO:0048599~oocyte development	6	0.421941	0.0176617	9.31999e+20	1049	15	9658	3.68275	1	0.458616	27.8305
GOTERM_BP_FAT	GO:0009994~oocyte differentiation	6	0.421941	0.023446	9.31999e+20	1049	16	9658	3.45257	1	0.503062	35.2248
GOTERM_BP_FAT	GO:0001556~oocyte maturation	5	0.351617	0.0334601	9.31999e+16	1049	12	9658	3.83619	1	0.581189	46.3616
GOTERM_BP_FAT	GO:0048469~cell maturation	12	0.843882	0.0359634	9.31999e+48	1049	56	9658	1.9729	1	0.597433	48.8481
GOTERM_BP_FAT	GO:0007292~female gamete generation	9	0.632911	0.0981316	9.31999e+32	1049	44	9658	1.88322	1	0.816306	84.9
GOTERM_BP_FAT	GO:0007281~germ cell development	13	0.914205	0.100703	9.31933e+48	1049	74	9658	1.61742	1	0.8204	85.6687
GOTERM_BP_FAT	GO:0021700~developmental maturation	13	0.914205	0.108702	9.31959e+52	1049	75	9658	1.59586	1	0.832499	87.8308
GOTERM_BP_FAT	GO:0048610~reproductive cellular process	13	0.914205	0.602234	9.31933e+48	1049	115	9658	1.04078	1	0.997419	100
Annotation Cluster 50	Enrichment Score: 1.2477101542088243
Category	Term	Count	%	PValue	Genes	List Total	Pop Hits	Pop Total	Fold Enrichment	Bonferroni	Benjamini	FDR
SP_PIR_KEYWORDS	vasoactive	5	0.351617	0.000566632	1.83488e+18	1397	5	13223	9.46528	0.30817	0.0242618	0.842706
GOTERM_BP_FAT	GO:0003013~circulatory system process	23	1.61744	0.00561851	2.70351e+88	1049	115	9658	1.84137	1	0.278631	9.79872
GOTERM_BP_FAT	GO:0008015~blood circulation	23	1.61744	0.00561851	2.70351e+88	1049	115	9658	1.84137	1	0.278631	9.79872
GOTERM_BP_FAT	GO:0003014~renal system process	7	0.492264	0.0125928	3.29118e+25	1049	19	9658	3.392	1	0.415798	20.7015
GOTERM_BP_FAT	GO:0050880~regulation of blood vessel size	9	0.632911	0.0307325	3.76418e+31	1049	35	9658	2.36748	1	0.566174	43.5224
GOTERM_BP_FAT	GO:0035150~regulation of tube size	9	0.632911	0.0307325	3.76418e+31	1049	35	9658	2.36748	1	0.566174	43.5224
GOTERM_BP_FAT	GO:0003018~vascular process in circulatory system	9	0.632911	0.0478783	3.76418e+31	1049	38	9658	2.18057	1	0.653499	59.2615
GOTERM_BP_FAT	GO:0007588~excretion	8	0.562588	0.0783983	1.60112e+30	1049	35	9658	2.10443	1	0.770362	77.5596
GOTERM_BP_FAT	GO:0030146~diuresis	3	0.21097	0.0941673	487938271906	1049	5	9658	5.52412	1	0.808666	83.6378
GOTERM_BP_FAT	GO:0019229~regulation of vasoconstriction	6	0.421941	0.0961775	5.92722e+21	1049	23	9658	2.40179	1	0.811157	84.2898
GOTERM_BP_FAT	GO:0007589~body fluid secretion	5	0.351617	0.123272	1.05515e+20	1049	18	9658	2.55746	1	0.857308	90.9999
GOTERM_BP_FAT	GO:0050891~multicellular organismal water homeostasis	3	0.21097	0.13135	487938271906	1049	6	9658	4.60343	1	0.867845	92.4025
GOTERM_BP_FAT	GO:0003091~renal water homeostasis	3	0.21097	0.13135	487938271906	1049	6	9658	4.60343	1	0.867845	92.4025
GOTERM_BP_FAT	GO:0030147~natriuresis	3	0.21097	0.13135	487938271906	1049	6	9658	4.60343	1	0.867845	92.4025
GOTERM_BP_FAT	GO:0030104~water homeostasis	3	0.21097	0.212517	487938271906	1049	8	9658	3.45257	1	0.937326	98.7385
GOTERM_BP_FAT	GO:0042310~vasoconstriction	3	0.21097	0.296984	1838571906	1049	10	9658	2.76206	1	0.968634	99.8419
GOTERM_MF_FAT	GO:0005179~hormone activity	7	0.492264	0.416302	1.83488e+28	994	48	9211	1.35138	1	0.992102	99.9829
GOTERM_BP_FAT	GO:0042311~vasodilation	3	0.21097	0.65501	37643827858	1049	20	9658	1.38103	1	0.998653	100
Annotation Cluster 51	Enrichment Score: 1.2431721832055778
Category	Term	Count	%	PValue	Genes	List Total	Pop Hits	Pop Total	Fold Enrichment	Bonferroni	Benjamini	FDR
GOTERM_BP_FAT	GO:0045446~endothelial cell differentiation	6	0.421941	0.00909608	1.82184e+22	1049	13	9658	4.24932	1	0.352965	15.4011
GOTERM_BP_FAT	GO:0001885~endothelial cell development	3	0.21097	0.0941673	183771680781	1049	5	9658	5.52412	1	0.808666	83.6378
GOTERM_BP_FAT	GO:0002064~epithelial cell development	4	0.281294	0.217635	1.83318e+15	1049	15	9658	2.45516	1	0.940784	98.8804
Annotation Cluster 52	Enrichment Score: 1.1913350210854885
Category	Term	Count	%	PValue	Genes	List Total	Pop Hits	Pop Total	Fold Enrichment	Bonferroni	Benjamini	FDR
GOTERM_BP_FAT	GO:0009064~glutamine family amino acid metabolic process	12	0.843882	0.0061366	8.01509e+51	1049	44	9658	2.51096	1	0.284314	10.655
KEGG_PATHWAY	hsa00250:Alanine, aspartate and glutamate metabolism	7	0.492264	0.0707368	8.65992e+28	436	25	3618	2.32349	0.999998	0.639925	59.5251
GOTERM_BP_FAT	GO:0009065~glutamine family amino acid catabolic process	5	0.351617	0.071089	8.01509e+19	1049	15	9658	3.06895	1	0.748145	74.0687
GOTERM_BP_FAT	GO:0009310~amine catabolic process	11	0.773558	0.101262	8.01509e+44	1049	59	9658	1.71653	1	0.819346	85.831
GOTERM_BP_FAT	GO:0016054~organic acid catabolic process	15	1.05485	0.112794	5446,2571,383,2806,5053,6822,80150,8659,3034,144193,30,51179,4329,51,586	1049	91	9658	1.51761	1	0.837591	88.8137
GOTERM_BP_FAT	GO:0046395~carboxylic acid catabolic process	15	1.05485	0.112794	5446,2571,383,2806,5053,6822,80150,8659,3034,144193,30,51179,4329,51,586	1049	91	9658	1.51761	1	0.837591	88.8137
GOTERM_BP_FAT	GO:0009063~cellular amino acid catabolic process	10	0.703235	0.11515	8.01509e+40	1049	53	9658	1.73714	1	0.84149	89.3451
Annotation Cluster 53	Enrichment Score: 1.1903487717856032
Category	Term	Count	%	PValue	Genes	List Total	Pop Hits	Pop Total	Fold Enrichment	Bonferroni	Benjamini	FDR
SMART	SM00129:KISc	9	0.632911	0.0232447	5.69921e+42	692	34	6501	2.48678	0.99951	0.499799	27.2378
INTERPRO	IPR001752:Kinesin, motor region	9	0.632911	0.0233532	5.69921e+42	1250	34	11754	2.48908	1	0.862301	32.9859
INTERPRO	IPR019821:Kinesin, motor region, conserved site	9	0.632911	0.0233532	5.69921e+42	1250	34	11754	2.48908	1	0.862301	32.9859
UP_SEQ_FEATURE	domain:Kinesin-motor	9	0.632911	0.0265611	5.69921e+42	1395	35	13210	2.43502	1	0.980008	38.9136
SP_PIR_KEYWORDS	motor protein	17	1.1955	0.0305669	5.69926e+78	1397	92	13223	1.74902	1	0.332068	37.0931
GOTERM_MF_FAT	GO:0003774~motor activity	17	1.1955	0.0791445	5.69926e+78	994	102	9211	1.54443	1	0.871365	73.5162
GOTERM_MF_FAT	GO:0003777~microtubule motor activity	10	0.703235	0.155659	5.69921e+46	994	57	9211	1.62572	1	0.935889	93.4551
UP_SEQ_FEATURE	region of interest:Globular	4	0.281294	0.177604	1.10044e+18	1395	14	13210	2.70558	1	0.999962	97.2124
GOTERM_CC_FAT	GO:0005871~kinesin complex	4	0.281294	0.206904	5.69921e+17	1000	14	8798	2.51371	1	0.840081	96.4955
GOTERM_BP_FAT	GO:0007018~microtubule-based movement	13	0.914205	0.268029	5.69924e+60	1049	90	9658	1.32988	1	0.961941	99.669
Annotation Cluster 54	Enrichment Score: 1.181036562453602
Category	Term	Count	%	PValue	Genes	List Total	Pop Hits	Pop Total	Fold Enrichment	Bonferroni	Benjamini	FDR
PIR_SUPERFAMILY	PIRSF000856:alcohol sulfotransferase	5	0.351617	0.00875339	6.78368e+19	589	8	5036	5.3438	0.996035	0.841718	12.2509
KEGG_PATHWAY	hsa00920:Sulfur metabolism	5	0.351617	0.0239162	1.03807e+20	436	10	3618	4.14908	0.987493	0.583674	25.8027
SP_PIR_KEYWORDS	sulfotransferase	4	0.281294	0.0437924	6.78368e+15	1397	8	13223	4.73264	1	0.399896	48.7581
GOTERM_MF_FAT	GO:0008146~sulfotransferase activity	8	0.562588	0.0762277	8.354e+32	994	35	9211	2.11808	1	0.866678	72.1316
INTERPRO	IPR000863:Sulfotransferase	6	0.421941	0.0766061	9.95568e+23	1250	22	11754	2.56451	1	0.970126	74.0763
UP_SEQ_FEATURE	nucleotide phosphate-binding region:PAPS	6	0.421941	0.101572	8.35397e+24	1395	24	13210	2.36738	1	0.999341	85.9289
GOTERM_MF_FAT	GO:0016782~transferase activity, transferring sulfur-containing groups	8	0.562588	0.175449	8.354e+32	994	43	9211	1.72402	1	0.944494	95.5339
SP_PIR_KEYWORDS	steroid metabolism	6	0.421941	0.37337	6.79931e+24	1397	38	13223	1.49452	1	0.868058	99.9069
Annotation Cluster 55	Enrichment Score: 1.1775870794660306
Category	Term	Count	%	PValue	Genes	List Total	Pop Hits	Pop Total	Fold Enrichment	Bonferroni	Benjamini	FDR
GOTERM_BP_FAT	GO:0042445~hormone metabolic process	16	1.12518	0.012048	8.35397e+67	1049	74	9658	1.99067	1	0.413533	19.8969
GOTERM_BP_FAT	GO:0010817~regulation of hormone levels	20	1.40647	0.012757	8.35396e+85	1049	102	9658	1.80527	1	0.412336	20.9426
GOTERM_BP_FAT	GO:0034754~cellular hormone metabolic process	10	0.703235	0.0383249	3.29168e+43	1049	43	9658	2.14113	1	0.613435	51.0936
GOTERM_BP_FAT	GO:0008210~estrogen metabolic process	4	0.281294	0.0469822	6.78374e+15	1049	8	9658	4.60343	1	0.653297	58.5541
KEGG_PATHWAY	hsa00140:Steroid hormone biosynthesis	8	0.562588	0.0702457	7.96443e+32	436	31	3618	2.14146	0.999998	0.666661	59.2606
KEGG_PATHWAY	hsa00150:Androgen and estrogen metabolism	5	0.351617	0.382555	7.96443e+20	436	26	3618	1.5958	1	0.928966	99.738
GOTERM_MF_FAT	GO:0016229~steroid dehydrogenase activity	3	0.21097	0.768239	7964432913283	994	25	9211	1.11199	1	0.99987	100
Annotation Cluster 56	Enrichment Score: 1.1697608500122394
Category	Term	Count	%	PValue	Genes	List Total	Pop Hits	Pop Total	Fold Enrichment	Bonferroni	Benjamini	FDR
GOTERM_CC_FAT	GO:0030141~secretory granule	26	1.82841	0.00497245	5066,5873,653808,928,10272,6809,1950,3382,51083,7060,7042,80763,3074,2153,7044,4922,7033,5154,4688,5345,2,1675,7076,710,1535,5125	1000	129	8798	1.77324	0.922866	0.13991	6.95274
GOTERM_CC_FAT	GO:0031988~membrane-bounded vesicle	62	4.36006	0.0655328	5066,2098,5538,191,51083,3382,7060,9143,2153,10133,4922,7033,2571,1182,4688,5176,8029,632,3309,309,80223,2,4646,134957,23682,7076,55704,115677,5125,5873,1601,822,653808,10272,928,6809,1950,8766,7042,80763,4908,3074,7044,4323,5154,54874,326624,652,858,5345,650,290,9182,115827,1675,54843,10287,1212,397,710,10457,1535	1000	445	8798	1.22579	1	0.64108	62.4626
GOTERM_CC_FAT	GO:0031982~vesicle	69	4.85232	0.122931	5066,2098,5538,191,51083,3382,7060,10652,9143,3485,2153,10133,4922,7033,2571,1182,4688,5176,8029,632,3309,309,80223,2,4646,134957,23682,7076,55704,115677,5125,9052,5873,1601,822,653808,115123,10272,928,6809,1950,8766,7042,4908,80763,3074,7044,4323,5154,54874,51704,326624,652,858,5345,857,650,26509,290,9182,115827,1675,54843,10287,1212,397,10457,710,1535	1000	522	8798	1.16295	1	0.754538	84.9867
GOTERM_CC_FAT	GO:0016023~cytoplasmic membrane-bounded vesicle	56	3.93812	0.178798	5066,2098,5538,191,51083,3382,7060,9143,2153,10133,4922,7033,4688,5176,8029,3309,309,80223,2,4646,134957,23682,7076,55704,115677,5125,5873,1601,822,653808,10272,928,6809,1950,8766,7042,80763,4908,3074,7044,4323,5154,54874,326624,858,5345,9182,115827,1675,54843,1212,10287,397,710,10457,1535	1000	428	8798	1.15114	1	0.830742	94.2022
GOTERM_CC_FAT	GO:0031410~cytoplasmic vesicle	64	4.5007	0.197761	5066,2098,5538,191,51083,3382,7060,10652,9143,3485,2153,10133,4922,7033,1182,4688,5176,8029,3309,309,80223,2,4646,134957,23682,7076,55704,115677,5125,9052,5873,1601,822,653808,115123,10272,928,6809,1950,8766,7042,80763,4908,3074,7044,4323,5154,54874,51704,326624,858,5345,857,26509,9182,115827,1675,54843,10287,1212,397,710,10457,1535	1000	499	8798	1.1284	1	0.829612	95.864
Annotation Cluster 57	Enrichment Score: 1.1417972212271579
Category	Term	Count	%	PValue	Genes	List Total	Pop Hits	Pop Total	Fold Enrichment	Bonferroni	Benjamini	FDR
UP_SEQ_FEATURE	domain:Kazal-like 1	4	0.281294	0.029624	7.29376e+18	1395	7	13210	5.41116	1	0.982301	42.3385
UP_SEQ_FEATURE	domain:Kazal-like 2	4	0.281294	0.0437415	7.29376e+18	1395	8	13210	4.73477	1	0.986879	55.9085
SMART	SM00274:FOLN	4	0.281294	0.0445119	1.11674e+20	692	8	6501	4.69725	1	0.626005	45.9681
INTERPRO	IPR003645:Follistatin-like, N-terminal	4	0.281294	0.0445266	1.11674e+20	1250	8	11754	4.7016	1	0.924898	53.7697
INTERPRO	IPR015369:Follistatin/Osteonectin-like EGF domain	3	0.21097	0.0907395	111671046810272	1250	5	11754	5.64192	1	0.971735	80.0368
INTERPRO	IPR011497:Protease inhibitor, Kazal-type	5	0.351617	0.135641	7.29658e+20	1250	19	11754	2.47453	1	0.988065	91.5341
SMART	SM00280:KAZAL	6	0.421941	0.152342	7.29658e+27	692	27	6501	2.08767	1	0.872497	89.2956
INTERPRO	IPR002350:Proteinase inhibitor I1, Kazal	6	0.421941	0.152399	7.29658e+27	1250	27	11754	2.0896	1	0.991571	93.9235
Annotation Cluster 58	Enrichment Score: 1.139610062499632
Category	Term	Count	%	PValue	Genes	List Total	Pop Hits	Pop Total	Fold Enrichment	Bonferroni	Benjamini	FDR
UP_SEQ_FEATURE	topological domain:Extracellular	167	11.744	0.0142147	10347,219699,392617,10205,2149,64115,64116,8743,91862,203413,8323,6768,7162,2150,2152,1829,55028,92359,6091,80731,3710,6092,51090,153562,9543,27075,51232,57211,28513,3685,5359,9057,2842,90139,9052,1000,6752,4224,9369,7103,56172,10673,928,6809,344838,5349,151258,3696,6583,6584,54682,89872,9429,83742,51704,57549,8754,25994,10280,57685,51313,491,23432,182,84873,26470,9766,185,84918,7107,5817,1836,64…	1395	1342	13210	1.1784	1	0.971757	23.0584
SP_PIR_KEYWORDS	transmembrane	343	24.121	0.0296076	113452,10347,201895,10205,1193,8417,10991,8743,3283,1312,388335,203413,7357,55379,8323,79605,65055,6768,7162,157378,79603,1829,56913,2329,1184,92359,1182,3710,6091,80731,6092,51090,153562,55858,27075,57211,28513,5359,81855,2330,1811,8869,55652,2842,90139,6752,4224,346606,347735,54886,928,84888,5349,54682,1462,89872,516,6476,206338,1468,65062,224,5243,51280,5768,8754,124935,57231,84873,182,185,374…	1397	2971	13223	1.09276	1	0.328798	36.1572
UP_SEQ_FEATURE	transmembrane region	340	23.91	0.0343616	113452,10347,201895,10205,1193,8417,10991,8743,3283,1312,388335,203413,7357,55379,8323,79605,65055,6768,7162,157378,79603,1829,56913,2329,1184,92359,1182,3710,6091,80731,6092,51090,153562,55858,27075,57211,28513,5359,81855,1811,8869,55652,2842,90139,6752,4224,346606,347735,54886,928,84888,5349,54682,89872,516,6476,206338,1468,65062,224,5243,51280,5768,8754,124935,57231,84873,182,185,374882,617,85…	1395	2954	13210	1.08993	1	0.97788	47.2806
SP_PIR_KEYWORDS	membrane	450	31.6456	0.0445888	113452,8417,10991,8743,3283,1312,388335,7357,55379,8323,79605,6768,157378,79603,1829,8875,8876,80731,6091,55227,6092,8029,27075,57211,5359,8727,1811,8869,115677,2842,90139,6752,824,346606,347735,130576,928,312,8766,51196,84888,5349,516,6476,8853,224,5243,5245,51280,51181,8754,57231,84873,182,185,374882,617,85455,1836,85358,115,987,10855,3386,3382,8842,10652,339977,432,25897,29957,57488,977,27035,…	1397	3985	13223	1.06885	1	0.400216	49.3917
UP_SEQ_FEATURE	topological domain:Cytoplasmic	214	15.0492	0.0794195	10205,8417,8743,203413,55379,8323,6768,7162,1829,56913,1184,1182,92359,6091,80731,3710,6092,153562,51090,27075,57211,28513,5359,8869,90139,2842,6752,4224,928,5349,84888,54682,89872,6476,206338,224,5243,51280,8754,182,84873,185,1836,253982,115,3386,8842,4071,4072,10381,432,253012,977,27035,23225,92255,149466,7976,79853,2264,252839,975,444,8455,9213,8829,57393,2984,55790,2569,3249,10267,967,965,360…	1395	1850	13210	1.09539	1	0.998362	78.0209
GOTERM_CC_FAT	GO:0016021~integral to membrane	366	25.7384	0.430199	113452,10347,201895,10205,1193,8417,10991,8743,3283,1312,388335,79902,203413,7357,55379,8323,79605,65055,6768,7162,157378,79603,1829,6616,56913,2329,1184,8876,92359,1182,3710,80731,6091,6092,51090,153562,55858,27075,79711,57211,28513,5359,25780,81855,2330,1811,8869,55652,2842,90139,732,6752,4224,346606,347735,54886,928,3843,729,84888,5349,4090,54682,1462,89872,516,6476,206338,1468,65062,224,5243,…	1000	3190	8798	1.00943	1	0.955341	99.9706
GOTERM_CC_FAT	GO:0031224~intrinsic to membrane	378	26.5823	0.478291	113452,10347,201895,10205,1193,8417,10991,8743,3283,1312,388335,79902,203413,7357,55379,8323,79605,65055,6768,7162,157378,79603,1829,6616,56913,2329,1184,8875,8876,92359,1182,3710,80731,6091,6092,51090,153562,55858,27075,79711,57211,28513,5359,25780,81855,2330,1811,8869,55652,2842,90139,732,6752,4224,346606,347735,54886,130576,928,3843,729,84888,5349,4090,54682,1462,89872,516,6476,206338,1468,650…	1000	3304	8798	1.00655	1	0.969305	99.9918
Annotation Cluster 59	Enrichment Score: 1.1246010624717389
Category	Term	Count	%	PValue	Genes	List Total	Pop Hits	Pop Total	Fold Enrichment	Bonferroni	Benjamini	FDR
SMART	SM00020:Tryp_SPc	13	0.914205	0.0170926	3.25032e+58	692	58	6501	2.10567	0.996249	0.427983	20.7914
INTERPRO	IPR001254:Peptidase S1 and S6, chymotrypsin/Hap	13	0.914205	0.0172591	3.25032e+58	1250	58	11754	2.10761	1	0.801016	25.5395
UP_SEQ_FEATURE	domain:Peptidase S1	12	0.843882	0.0180345	3.25021e+53	1395	52	13210	2.18528	1	0.951334	28.3377
INTERPRO	IPR001314:Peptidase S1A, chymotrypsin	11	0.773558	0.0271335	3.25032e+47	1250	48	11754	2.1549	1	0.878444	37.2467
SP_PIR_KEYWORDS	zymogen	21	1.47679	0.0281989	4.22421e+82	1397	121	13223	1.64274	1	0.332482	34.7594
GOTERM_MF_FAT	GO:0004252~serine-type endopeptidase activity	16	1.12518	0.0305168	3.25021e+70	994	83	9211	1.78633	1	0.713296	39.311
GOTERM_MF_FAT	GO:0017171~serine hydrolase activity	19	1.33615	0.0309866	3.25058e+84	994	105	9211	1.67681	1	0.706697	39.7832
INTERPRO	IPR018114:Peptidase S1/S6, chymotrypsin/Hap, active site	11	0.773558	0.0351491	2.14717e+46	1250	50	11754	2.0687	1	0.894779	45.4525
GOTERM_MF_FAT	GO:0008236~serine-type peptidase activity	18	1.26582	0.052309	3.25021e+79	994	104	9211	1.60383	1	0.808488	57.9266
SP_PIR_KEYWORDS	Serine protease	13	0.914205	0.100825	2.14756e+52	1397	76	13223	1.61906	1	0.569342	79.5425
INTERPRO	IPR018059:Kringle, subgroup	4	0.281294	0.10327	2.14722e+15	1250	11	11754	3.41935	1	0.981707	84.2186
GOTERM_MF_FAT	GO:0070011~peptidase activity, acting on L-amino acid peptides	48	3.37553	0.11257	2147,3240,51321,59342,1520,6768,11098,51279,3250,837,839,51056,5649,1512,7511,1510,57393,2161,1519,5125,1515,3249,64172,824,4224,60509,57695,167681,3026,57094,84888,1803,4905,4323,5699,206338,95,59272,1361,2346,290,8754,4485,79875,1675,715,3426,57602,1358	994	366	9211	1.21529	1	0.906169	85.4042
SP_PIR_KEYWORDS	Protease	42	2.95359	0.117711	8.24642e+175	1397	322	13223	1.2346	1	0.611923	84.586
GOTERM_MF_FAT	GO:0008233~peptidase activity	50	3.51617	0.1207	3240,2147,6590,51321,59342,1520,6768,11098,2150,51279,3250,837,839,51056,5649,1512,7511,1510,57393,2161,1519,5125,1515,3249,824,64172,4224,60509,57695,3026,167681,57094,1803,84888,4905,4323,5699,206338,59272,95,1361,2346,4485,8754,290,79875,1675,715,3426,57602,1358	994	385	9211	1.20345	1	0.918417	87.416
SP_PIR_KEYWORDS	kringle	4	0.281294	0.150872	2.14722e+15	1397	13	13223	2.91239	1	0.669562	91.3003
INTERPRO	IPR018056:Kringle, conserved site	4	0.281294	0.153023	2.14722e+15	1250	13	11754	2.89329	1	0.990391	93.9989
INTERPRO	IPR000001:Kringle	4	0.281294	0.153023	2.14722e+15	1250	13	11754	2.89329	1	0.990391	93.9989
SMART	SM00130:KR	4	0.281294	0.153038	2.14722e+15	692	13	6501	2.89062	1	0.86374	89.4139
GOTERM_MF_FAT	GO:0004175~endopeptidase activity	31	2.18003	0.155432	6.41728e+130	994	230	9211	1.24898	1	0.938048	93.4267
UP_SEQ_FEATURE	active site:Charge relay system	17	1.1955	0.177475	2.14723e+73	1395	118	13210	1.36425	1	0.999967	97.2044
SP_PIR_KEYWORDS	serine proteinase	6	0.421941	0.308126	7.18215e+21	1397	35	13223	1.62262	1	0.825818	99.5913
GOTERM_BP_FAT	GO:0006508~proteolysis	91	6.39944	0.335031	90293,2147,3240,26223,8535,159195,55884,51321,8835,25897,59342,1520,63893,6768,51130,11098,701,339745,2152,51279,3250,223082,9636,10537,79791,8405,55030,837,5705,839,51056,1512,1510,7511,57393,8452,80176,64320,2161,1519,134111,29945,5125,3249,1515,732,64172,824,4224,115123,60509,54532,57695,1604,167681,3026,729,57094,725,1803,6907,84708,3075,4905,5699,4323,206338,26232,95,59272,55148,1361,11065,2…	1049	793	9658	1.05653	1	0.976812	99.9429
Annotation Cluster 60	Enrichment Score: 1.1048121909875828
Category	Term	Count	%	PValue	Genes	List Total	Pop Hits	Pop Total	Fold Enrichment	Bonferroni	Benjamini	FDR
GOTERM_MF_FAT	GO:0005125~cytokine activity	19	1.33615	0.0309866	1.03443e+80	994	105	9211	1.67681	1	0.706697	39.7832
SP_PIR_KEYWORDS	cytokine	17	1.1955	0.0364988	1.03443e+72	1397	94	13223	1.71181	1	0.366186	42.6018
KEGG_PATHWAY	hsa04060:Cytokine-cytokine receptor interaction	20	1.40647	0.428657	1.03445e+82	436	149	3618	1.11385	1	0.935321	99.8994
Annotation Cluster 61	Enrichment Score: 1.0796529725206878
Category	Term	Count	%	PValue	Genes	List Total	Pop Hits	Pop Total	Fold Enrichment	Bonferroni	Benjamini	FDR
GOTERM_BP_FAT	GO:0000086~G2/M transition of mitotic cell cycle	9	0.632911	0.00104268	1.00831e+35	1049	21	9658	3.9458	0.97344	0.101219	1.89132
BIOCARTA	h_g2Pathway:Cell Cycle: G2/M Checkpoint	5	0.351617	0.216183	1.64711e+18	148	19	1152	2.04836	1	0.997019	95.1683
KEGG_PATHWAY	hsa04115:p53 signaling pathway	10	0.703235	0.30827	8.49391e+37	436	61	3618	1.36035	1	0.915476	98.9368
BIOCARTA	h_atmPathway:ATM Signaling Pathway	3	0.21097	0.691011	164711111026	148	18	1152	1.2973	1	0.999821	100
Annotation Cluster 62	Enrichment Score: 1.057831274557543
Category	Term	Count	%	PValue	Genes	List Total	Pop Hits	Pop Total	Fold Enrichment	Bonferroni	Benjamini	FDR
SMART	SM00314:RA	8	0.562588	0.0810994	2.88823e+37	692	36	6501	2.08767	1	0.781811	68.1287
INTERPRO	IPR000159:Ras-association	8	0.562588	0.0812584	2.88823e+37	1250	36	11754	2.0896	1	0.973805	76.202
UP_SEQ_FEATURE	domain:Ras-associating	7	0.492264	0.10177	2.88823e+32	1395	31	13210	2.13828	1	0.999144	85.9855
Annotation Cluster 63	Enrichment Score: 1.057136281555497
Category	Term	Count	%	PValue	Genes	List Total	Pop Hits	Pop Total	Fold Enrichment	Bonferroni	Benjamini	FDR
SP_PIR_KEYWORDS	amino-acid transport	9	0.632911	0.00535252	9.05655e+43	1397	27	13223	3.15509	0.969453	0.113339	7.70065
INTERPRO	IPR004841:Amino acid permease-associated region	5	0.351617	0.116355	9.05691e+21	1250	18	11754	2.612	1	0.984877	87.697
INTERPRO	IPR002293:Amino acid/polyamine transporter I	3	0.21097	0.28822	9056905756301	1250	10	11754	2.82096	1	0.999201	99.6846
PIR_SUPERFAMILY	PIRSF006060:AA_transporter	3	0.21097	0.329144	9056905756301	589	10	5036	2.56503	1	1	99.7352
Annotation Cluster 64	Enrichment Score: 1.0536784496437885
Category	Term	Count	%	PValue	Genes	List Total	Pop Hits	Pop Total	Fold Enrichment	Bonferroni	Benjamini	FDR
UP_SEQ_FEATURE	propeptide:Removed in mature form	23	1.61744	0.0296685	2.34816e+94	1395	137	13210	1.58978	1	0.97957	42.3869
SP_PIR_KEYWORDS	blocked carboxyl end	4	0.281294	0.0437924	96676249071604	1397	8	13223	4.73264	1	0.399896	48.7581
SP_PIR_KEYWORDS	phosphatidylinositol linkage	5	0.351617	0.0522304	9.66763e+16	1397	14	13223	3.38046	1	0.44074	55.11
SP_PIR_KEYWORDS	gpi-anchor	11	0.773558	0.0963328	2.34816e+44	1397	60	13223	1.7353	1	0.565445	77.9624
UP_SEQ_FEATURE	lipid moiety-binding region:GPI-anchor amidated serine	6	0.421941	0.185346	2.34876e+24	1395	29	13210	1.95921	1	0.999973	97.6557
GOTERM_CC_FAT	GO:0031225~anchored to membrane	17	1.1955	0.393145	5.87323e+71	1000	129	8798	1.15943	1	0.945922	99.9269
Annotation Cluster 65	Enrichment Score: 1.0478810963582532
Category	Term	Count	%	PValue	Genes	List Total	Pop Hits	Pop Total	Fold Enrichment	Bonferroni	Benjamini	FDR
SP_PIR_KEYWORDS	microsome	15	1.05485	0.0294457	2.32958e+67	1397	77	13223	1.84389	1	0.332845	35.998
GOTERM_CC_FAT	GO:0042598~vesicular fraction	29	2.03938	0.146789	5.75528e+125	1000	201	8798	1.26936	1	0.785524	89.923
GOTERM_CC_FAT	GO:0005792~microsome	28	1.96906	0.166204	5.75528e+120	1000	196	8798	1.25686	1	0.822742	92.7754
Annotation Cluster 66	Enrichment Score: 1.0459321493908258
Category	Term	Count	%	PValue	Genes	List Total	Pop Hits	Pop Total	Fold Enrichment	Bonferroni	Benjamini	FDR
SP_PIR_KEYWORDS	lipid transport	10	0.703235	0.068274	2.62076e+50	1397	49	13223	1.93169	1	0.501649	65.2109
INTERPRO	IPR018494:Oxysterol-binding protein, conserved site	4	0.281294	0.10327	1.14876e+22	1250	11	11754	3.41935	1	0.981707	84.2186
INTERPRO	IPR000648:Oxysterol-binding protein	4	0.281294	0.10327	1.14876e+22	1250	11	11754	3.41935	1	0.981707	84.2186
Annotation Cluster 67	Enrichment Score: 1.0417780197832807
Category	Term	Count	%	PValue	Genes	List Total	Pop Hits	Pop Total	Fold Enrichment	Bonferroni	Benjamini	FDR
GOTERM_BP_FAT	GO:0007411~axon guidance	15	1.05485	0.0167821	3.67022e+61	1049	70	9658	1.9729	1	0.45493	26.6386
GOTERM_BP_FAT	GO:0000904~cell morphogenesis involved in differentiation	30	2.1097	0.0202427	1.60122e+121	1049	181	9658	1.526	1	0.476178	31.2234
GOTERM_BP_FAT	GO:0030030~cell projection organization	42	2.95359	0.0278482	5.57857e+171	1049	280	9658	1.38103	1	0.544265	40.3659
GOTERM_BP_FAT	GO:0048666~neuron development	35	2.46132	0.0624087	2.197e+144	1049	240	9658	1.34267	1	0.722163	69.256
GOTERM_BP_FAT	GO:0030182~neuron differentiation	44	3.09423	0.0642532	7.10122e+182	1049	315	9658	1.28604	1	0.726817	70.3444
GOTERM_BP_FAT	GO:0031175~neuron projection development	27	1.89873	0.110487	2.197e+110	1049	187	9658	1.32933	1	0.834999	88.2692
GOTERM_BP_FAT	GO:0048667~cell morphogenesis involved in neuron differentiation	22	1.54712	0.11447	3.67022e+88	1049	147	9658	1.3779	1	0.840916	89.1942
GOTERM_BP_FAT	GO:0032989~cellular component morphogenesis	39	2.74262	0.148585	1.60122e+157	1049	295	9658	1.21718	1	0.888525	94.7355
GOTERM_BP_FAT	GO:0007409~axonogenesis	20	1.40647	0.149524	3.67022e+81	1049	136	9658	1.35395	1	0.889238	94.8407
GOTERM_BP_FAT	GO:0000902~cell morphogenesis	35	2.46132	0.175957	1.60122e+141	1049	266	9658	1.21143	1	0.910414	97.1052
GOTERM_BP_FAT	GO:0048812~neuron projection morphogenesis	21	1.47679	0.219573	3.67022e+85	1049	153	9658	1.26369	1	0.941359	98.9301
GOTERM_BP_FAT	GO:0048858~cell projection morphogenesis	24	1.68776	0.223619	3.67022e+97	1049	179	9658	1.23444	1	0.944218	99.0272
GOTERM_BP_FAT	GO:0032990~cell part morphogenesis	24	1.68776	0.310923	3.67022e+97	1049	189	9658	1.16913	1	0.971512	99.8904
Annotation Cluster 68	Enrichment Score: 1.040597003331118
Category	Term	Count	%	PValue	Genes	List Total	Pop Hits	Pop Total	Fold Enrichment	Bonferroni	Benjamini	FDR
GOTERM_BP_FAT	GO:0042573~retinoic acid metabolic process	5	0.351617	0.0243531	5.93426e+23	1049	11	9658	4.18494	1	0.513527	36.3172
GOTERM_BP_FAT	GO:0034754~cellular hormone metabolic process	10	0.703235	0.0383249	3.29168e+43	1049	43	9658	2.14113	1	0.613435	51.0936
GOTERM_BP_FAT	GO:0006776~vitamin A metabolic process	6	0.421941	0.0383456	5.93426e+27	1049	18	9658	3.06895	1	0.611078	51.1129
GOTERM_BP_FAT	GO:0016101~diterpenoid metabolic process	6	0.421941	0.047543	1.28593e+26	1049	19	9658	2.90743	1	0.653143	58.9982
GOTERM_BP_FAT	GO:0001523~retinoid metabolic process	6	0.421941	0.047543	1.28593e+26	1049	19	9658	2.90743	1	0.653143	58.9982
GOTERM_BP_FAT	GO:0006721~terpenoid metabolic process	6	0.421941	0.0579325	1.28593e+26	1049	20	9658	2.76206	1	0.707173	66.4557
GOTERM_BP_FAT	GO:0006720~isoprenoid metabolic process	8	0.562588	0.09964	1.28593e+34	1049	37	9658	1.99067	1	0.818383	85.3556
GOTERM_BP_FAT	GO:0006766~vitamin metabolic process	11	0.773558	0.140305	4.19923e+48	1049	63	9658	1.60755	1	0.879985	93.7151
GOTERM_BP_FAT	GO:0006775~fat-soluble vitamin metabolic process	6	0.421941	0.144303	5.93426e+27	1049	26	9658	2.12466	1	0.883612	94.2291
GOTERM_BP_FAT	GO:0019748~secondary metabolic process	11	0.773558	0.174034	4.19927e+49	1049	66	9658	1.53448	1	0.910132	96.979
COG_ONTOLOGY	Secondary metabolites biosynthesis, transport, and catabolism	6	0.421941	0.3809	1.55916e+25	144	44	1554	1.47159	1	0.939008	98.5695
GOTERM_BP_FAT	GO:0006081~cellular aldehyde metabolic process	4	0.281294	0.519713	1.28225e+15	1049	25	9658	1.4731	1	0.994337	99.9999
Annotation Cluster 69	Enrichment Score: 1.0354764971793715
Category	Term	Count	%	PValue	Genes	List Total	Pop Hits	Pop Total	Fold Enrichment	Bonferroni	Benjamini	FDR
GOTERM_BP_FAT	GO:0030155~regulation of cell adhesion	21	1.47679	0.0126984	3.67329e+82	1049	109	9658	1.7738	1	0.414632	20.8566
GOTERM_BP_FAT	GO:0045785~positive regulation of cell adhesion	9	0.632911	0.0882393	7.04237e+37	1049	43	9658	1.92702	1	0.792982	81.5629
GOTERM_BP_FAT	GO:0010810~regulation of cell-substrate adhesion	7	0.492264	0.173159	3.49118e+28	1049	35	9658	1.84137	1	0.909715	96.9199
GOTERM_BP_FAT	GO:0010811~positive regulation of cell-substrate adhesion	4	0.281294	0.37174	3.49118e+17	1049	20	9658	1.84137	1	0.982428	99.9798
Annotation Cluster 70	Enrichment Score: 1.0120015125713973
Category	Term	Count	%	PValue	Genes	List Total	Pop Hits	Pop Total	Fold Enrichment	Bonferroni	Benjamini	FDR
GOTERM_BP_FAT	GO:0035295~tube development	29	2.03938	0.0276665	3.08752e+116	1049	178	9658	1.49999	1	0.544763	40.1615
GOTERM_BP_FAT	GO:0048754~branching morphogenesis of a tube	11	0.773558	0.0562311	3.4911e+41	1049	53	9658	1.91086	1	0.702567	65.3294
GOTERM_BP_FAT	GO:0001763~morphogenesis of a branching structure	12	0.843882	0.0616826	6.69235e+45	1049	61	9658	1.81119	1	0.721953	68.8174
GOTERM_BP_FAT	GO:0035239~tube morphogenesis	18	1.26582	0.0638879	1.02539e+71	1049	106	9658	1.56343	1	0.726725	70.1318
GOTERM_BP_FAT	GO:0001658~branching involved in ureteric bud morphogenesis	4	0.281294	0.37174	1836523911650	1049	20	9658	1.84137	1	0.982428	99.9798
GOTERM_BP_FAT	GO:0060675~ureteric bud morphogenesis	4	0.281294	0.37174	1836523911650	1049	20	9658	1.84137	1	0.982428	99.9798
Annotation Cluster 71	Enrichment Score: 1.007985594932616
Category	Term	Count	%	PValue	Genes	List Total	Pop Hits	Pop Total	Fold Enrichment	Bonferroni	Benjamini	FDR
UP_SEQ_FEATURE	nucleotide phosphate-binding region:NADP	12	0.843882	0.0301953	4.19923e+52	1395	56	13210	2.02919	1	0.97806	42.9568
INTERPRO	IPR016040:NAD(P)-binding domain	20	1.40647	0.0884406	4.19933e+86	1250	129	11754	1.45786	1	0.973371	79.1644
INTERPRO	IPR002347:Glucose/ribitol dehydrogenase	8	0.562588	0.152586	5.58256e+37	1250	42	11754	1.79109	1	0.990953	93.9463
INTERPRO	IPR002198:Short-chain dehydrogenase/reductase SDR	8	0.562588	0.228009	5.58256e+37	1250	47	11754	1.60054	1	0.998223	98.7518
Annotation Cluster 72	Enrichment Score: 0.9974079853846394
Category	Term	Count	%	PValue	Genes	List Total	Pop Hits	Pop Total	Fold Enrichment	Bonferroni	Benjamini	FDR
UP_SEQ_FEATURE	domain:NTR	5	0.351617	0.0405439	2.65777e+20	1395	13	13210	3.64213	1	0.987408	53.1295
INTERPRO	IPR001134:Netrin domain	5	0.351617	0.0414453	2.65777e+20	1250	13	11754	3.61662	1	0.923605	51.1784
INTERPRO	IPR018933:Netrin module, non-TIMP type	3	0.21097	0.246836	2657771859277	1250	9	11754	3.1344	1	0.998476	99.1784
SMART	SM00643:C345C	3	0.21097	0.246921	2657771859277	692	9	6501	3.1315	1	0.927574	97.8377
Annotation Cluster 73	Enrichment Score: 0.9936585167984797
Category	Term	Count	%	PValue	Genes	List Total	Pop Hits	Pop Total	Fold Enrichment	Bonferroni	Benjamini	FDR
GOTERM_BP_FAT	GO:0001990~regulation of systemic arterial blood pressure by hormone	6	0.421941	0.00392877	5.92723e+22	1049	11	9658	5.02193	0.999999	0.227655	6.95161
GOTERM_BP_FAT	GO:0003044~regulation of systemic arterial blood pressure mediated by a chemical signal	7	0.492264	0.00493618	5.92727e+26	1049	16	9658	4.028	1	0.264593	8.65909
GOTERM_BP_FAT	GO:0003014~renal system process	7	0.492264	0.0125928	3.29118e+25	1049	19	9658	3.392	1	0.415798	20.7015
GOTERM_BP_FAT	GO:0050886~endocrine process	6	0.421941	0.0129054	5.92723e+22	1049	14	9658	3.9458	1	0.412275	21.1598
GOTERM_BP_FAT	GO:0003073~regulation of systemic arterial blood pressure	7	0.492264	0.0208719	5.92727e+26	1049	21	9658	3.06895	1	0.480561	32.0273
GOTERM_BP_FAT	GO:0008217~regulation of blood pressure	13	0.914205	0.0289507	2.70351e+50	1049	61	9658	1.96212	1	0.555554	41.5916
GOTERM_BP_FAT	GO:0003081~regulation of systemic arterial blood pressure by renin-angiotensin	4	0.281294	0.0318908	592721831855125	1049	7	9658	5.26106	1	0.577042	44.745
GOTERM_BP_FAT	GO:0048015~phosphoinositide-mediated signaling	12	0.843882	0.045131	2.23718e+46	1049	58	9658	1.90487	1	0.645216	57.0555
GOTERM_BP_FAT	GO:0002016~regulation of blood volume by renin-angiotensin	3	0.21097	0.0608063	59272183185	1049	4	9658	6.90515	1	0.718755	68.28
GOTERM_BP_FAT	GO:0019722~calcium-mediated signaling	6	0.421941	0.0822721	5.11964e+23	1049	22	9658	2.51096	1	0.778667	79.2247
GOTERM_BP_FAT	GO:0001991~regulation of systemic arterial blood pressure by circulatory renin-angiotensin	3	0.21097	0.0941673	592721835125	1049	5	9658	5.52412	1	0.808666	83.6378
GOTERM_BP_FAT	GO:0003071~renal system process involved in regulation of systemic arterial blood pressure	3	0.21097	0.0941673	3291183185	1049	5	9658	5.52412	1	0.808666	83.6378
GOTERM_BP_FAT	GO:0019229~regulation of vasoconstriction	6	0.421941	0.0961775	5.92722e+21	1049	23	9658	2.40179	1	0.811157	84.2898
BIOCARTA	h_ace2Pathway:Angiotensin-converting enzyme 2 regulates heart function	3	0.21097	0.124753	59272183185	148	5	1152	4.67027	1	0.993843	80.9393
KEGG_PATHWAY	hsa04614:Renin-angiotensin system	4	0.281294	0.136959	59272183185290	436	11	3618	3.01751	1	0.791588	83.7318
GOTERM_BP_FAT	GO:0045777~positive regulation of blood pressure	4	0.281294	0.160151	71681283291183	1049	13	9658	2.83288	1	0.90142	95.9013
GOTERM_BP_FAT	GO:0060193~positive regulation of lipase activity	8	0.562588	0.195022	1.83512e+29	1049	44	9658	1.67398	1	0.926524	98.114
GOTERM_BP_FAT	GO:0060191~regulation of lipase activity	9	0.632911	0.212206	2.73292e+34	1049	53	9658	1.56343	1	0.937618	98.7294
GOTERM_BP_FAT	GO:0010517~regulation of phospholipase activity	7	0.492264	0.244129	2.73292e+26	1049	39	9658	1.65251	1	0.953165	99.4041
GOTERM_BP_FAT	GO:0051482~elevation of cytosolic calcium ion concentration during G-protein signaling, coupled to IP3 second messenger (phospholipase C activating)	3	0.21097	0.254686	21491851906	1049	9	9658	3.06895	1	0.958618	99.5393
GOTERM_BP_FAT	GO:0010863~positive regulation of phospholipase C activity	6	0.421941	0.306807	1.83512e+21	1049	34	9658	1.62474	1	0.970995	99.8778
GOTERM_BP_FAT	GO:0007202~activation of phospholipase C activity	6	0.421941	0.306807	1.83512e+21	1049	34	9658	1.62474	1	0.970995	99.8778
GOTERM_BP_FAT	GO:0007200~activation of phospholipase C activity by G-protein coupled receptor protein signaling pathway coupled to IP3 second messenger	5	0.351617	0.38734	1.83512e+18	1049	29	9658	1.58739	1	0.984173	99.9873
GOTERM_BP_FAT	GO:0010518~positive regulation of phospholipase activity	6	0.421941	0.396481	1.83512e+21	1049	38	9658	1.45372	1	0.985329	99.9903
GOTERM_BP_FAT	GO:0051345~positive regulation of hydrolase activity	15	1.05485	0.454663	3.67355e+57	1049	122	9658	1.13199	1	0.990876	99.9985
GOTERM_BP_FAT	GO:0007205~activation of protein kinase C activity by G-protein coupled receptor protein signaling pathway	4	0.281294	0.547054	5.11962e+16	1049	26	9658	1.41644	1	0.995583	99.9999
GOTERM_BP_FAT	GO:0051353~positive regulation of oxidoreductase activity	3	0.21097	0.596581	1831851906	1049	18	9658	1.53448	1	0.997294	100
GOTERM_BP_FAT	GO:0051341~regulation of oxidoreductase activity	3	0.21097	0.852143	1831851906	1049	30	9658	0.920686	1	0.999949	100
Annotation Cluster 74	Enrichment Score: 0.9844993834993122
Category	Term	Count	%	PValue	Genes	List Total	Pop Hits	Pop Total	Fold Enrichment	Bonferroni	Benjamini	FDR
SMART	SM00327:VWA	10	0.703235	0.0702749	3.40267e+44	692	49	6501	1.91725	1	0.750612	62.6611
INTERPRO	IPR002035:von Willebrand factor, type A	10	0.703235	0.070512	3.40267e+44	1250	49	11754	1.91902	1	0.963249	71.0207
UP_SEQ_FEATURE	domain:VWFA	7	0.492264	0.224615	3.67341e+30	1395	39	13210	1.69966	1	0.999995	99.0512
Annotation Cluster 75	Enrichment Score: 0.9829820008197288
Category	Term	Count	%	PValue	Genes	List Total	Pop Hits	Pop Total	Fold Enrichment	Bonferroni	Benjamini	FDR
UP_SEQ_FEATURE	repeat:Gelsolin-like 3	5	0.351617	0.006095	6.84082e+20	1395	8	13210	5.91846	1	0.856092	10.5897
UP_SEQ_FEATURE	repeat:Gelsolin-like 2	5	0.351617	0.006095	6.84082e+20	1395	8	13210	5.91846	1	0.856092	10.5897
UP_SEQ_FEATURE	repeat:Gelsolin-like 1	5	0.351617	0.006095	6.84082e+20	1395	8	13210	5.91846	1	0.856092	10.5897
SMART	SM00262:GEL	5	0.351617	0.00623848	6.84082e+20	692	8	6501	5.87157	0.868349	0.25148	8.11267
INTERPRO	IPR007122:Gelsolin	5	0.351617	0.00624876	6.84082e+20	1250	8	11754	5.877	0.999984	0.601642	10.0736
GOTERM_BP_FAT	GO:0033043~regulation of organelle organization	31	2.18003	0.0109172	8.22509e+132	1049	180	9658	1.58563	1	0.394895	18.2021
UP_SEQ_FEATURE	repeat:Gelsolin-like 4	4	0.281294	0.029624	6.84051e+17	1395	7	13210	5.41116	1	0.982301	42.3385
UP_SEQ_FEATURE	repeat:Gelsolin-like 5	4	0.281294	0.029624	6.84051e+17	1395	7	13210	5.41116	1	0.982301	42.3385
GOTERM_BP_FAT	GO:0051493~regulation of cytoskeleton organization	20	1.40647	0.0345293	8.47228e+88	1049	113	9658	1.62953	1	0.590199	47.4374
INTERPRO	IPR007123:Gelsolin region	5	0.351617	0.0532864	6.84082e+20	1250	14	11754	3.35829	1	0.94627	60.4477
UP_SEQ_FEATURE	repeat:Gelsolin-like 6	3	0.21097	0.08963	50853293485477	1395	5	13210	5.68172	1	0.998912	82.0806
PIR_SUPERFAMILY	PIRSF002347:villin	3	0.21097	0.107108	50853293485477	589	5	5036	5.13005	1	0.999865	81.4372
GOTERM_BP_FAT	GO:0044087~regulation of cellular component biogenesis	17	1.1955	0.136991	8.47228e+69	1049	110	9658	1.42288	1	0.874387	93.2566
GOTERM_BP_FAT	GO:0043242~negative regulation of protein complex disassembly	7	0.492264	0.156914	8.22509e+30	1049	34	9658	1.89553	1	0.897153	95.6024
GOTERM_BP_FAT	GO:0030835~negative regulation of actin filament depolymerization	5	0.351617	0.16485	8.22509e+21	1049	20	9658	2.30172	1	0.903464	96.3014
GOTERM_BP_FAT	GO:0032271~regulation of protein polymerization	9	0.632911	0.197556	8.47228e+36	1049	52	9658	1.5935	1	0.927308	98.2197
SP_PIR_KEYWORDS	actin capping	4	0.281294	0.20585	8.22509e+16	1397	15	13223	2.52408	1	0.740675	96.7978
GOTERM_BP_FAT	GO:0030834~regulation of actin filament depolymerization	5	0.351617	0.210618	8.22509e+21	1049	22	9658	2.09247	1	0.937895	98.6816
GOTERM_BP_FAT	GO:0032970~regulation of actin filament-based process	11	0.773558	0.224224	8.22515e+47	1049	70	9658	1.44679	1	0.944186	99.041
GOTERM_BP_FAT	GO:0032956~regulation of actin cytoskeleton organization	11	0.773558	0.224224	8.22515e+47	1049	70	9658	1.44679	1	0.944186	99.041
GOTERM_BP_FAT	GO:0043254~regulation of protein complex assembly	11	0.773558	0.224224	8.47228e+43	1049	70	9658	1.44679	1	0.944186	99.041
GOTERM_BP_FAT	GO:0010639~negative regulation of organelle organization	10	0.703235	0.300379	8.22509e+41	1049	67	9658	1.37416	1	0.969794	99.8553
GOTERM_BP_FAT	GO:0051494~negative regulation of cytoskeleton organization	7	0.492264	0.301997	8.22509e+30	1049	42	9658	1.53448	1	0.969883	99.8613
GOTERM_BP_FAT	GO:0051693~actin filament capping	4	0.281294	0.309563	8.22509e+16	1049	18	9658	2.04597	1	0.971533	99.8864
GOTERM_BP_FAT	GO:0043244~regulation of protein complex disassembly	7	0.492264	0.321844	8.22509e+30	1049	43	9658	1.49879	1	0.974792	99.9182
GOTERM_BP_FAT	GO:0030837~negative regulation of actin filament polymerization	4	0.281294	0.37174	8.22509e+16	1049	20	9658	1.84137	1	0.982428	99.9798
GOTERM_BP_FAT	GO:0032272~negative regulation of protein polymerization	4	0.281294	0.402483	8.22509e+16	1049	21	9658	1.75369	1	0.985797	99.9919
GOTERM_BP_FAT	GO:0051129~negative regulation of cellular component organization	15	1.05485	0.416541	8.22509e+61	1049	119	9658	1.16053	1	0.987324	99.9948
GOTERM_BP_FAT	GO:0031333~negative regulation of protein complex assembly	4	0.281294	0.547054	8.22509e+16	1049	26	9658	1.41644	1	0.995583	99.9999
GOTERM_BP_FAT	GO:0008064~regulation of actin polymerization or depolymerization	6	0.421941	0.568477	8.22509e+26	1049	46	9658	1.2009	1	0.996457	100
GOTERM_BP_FAT	GO:0030832~regulation of actin filament length	6	0.421941	0.607507	8.22509e+26	1049	48	9658	1.15086	1	0.997579	100
GOTERM_BP_FAT	GO:0030833~regulation of actin filament polymerization	5	0.351617	0.644277	8.22509e+21	1049	40	9658	1.15086	1	0.998462	100
Annotation Cluster 76	Enrichment Score: 0.9761185603536722
Category	Term	Count	%	PValue	Genes	List Total	Pop Hits	Pop Total	Fold Enrichment	Bonferroni	Benjamini	FDR
GOTERM_BP_FAT	GO:0032886~regulation of microtubule-based process	11	0.773558	0.0201814	1.04608e+49	1049	45	9658	2.25057	1	0.478237	31.1447
GOTERM_BP_FAT	GO:0031110~regulation of microtubule polymerization or depolymerization	8	0.562588	0.0220275	8.47223e+35	1049	27	9658	2.72796	1	0.490148	33.4808
GOTERM_BP_FAT	GO:0031112~positive regulation of microtubule polymerization or depolymerization	5	0.351617	0.0243531	8.47221e+19	1049	11	9658	4.18494	1	0.513527	36.3172
GOTERM_BP_FAT	GO:0031116~positive regulation of microtubule polymerization	4	0.281294	0.0854963	847228581027857	1049	10	9658	3.68275	1	0.788644	80.5208
GOTERM_BP_FAT	GO:0031113~regulation of microtubule polymerization	4	0.281294	0.108425	847228581027857	1049	11	9658	3.34795	1	0.833029	87.7614
GOTERM_BP_FAT	GO:0070507~regulation of microtubule cytoskeleton organization	8	0.562588	0.111328	8.47223e+35	1049	38	9658	1.93829	1	0.836078	88.4706
GOTERM_BP_FAT	GO:0051495~positive regulation of cytoskeleton organization	8	0.562588	0.123706	8.47227e+31	1049	39	9658	1.88859	1	0.857172	91.0811
GOTERM_BP_FAT	GO:0032271~regulation of protein polymerization	9	0.632911	0.197556	8.47228e+36	1049	52	9658	1.5935	1	0.927308	98.2197
GOTERM_BP_FAT	GO:0043254~regulation of protein complex assembly	11	0.773558	0.224224	8.47228e+43	1049	70	9658	1.44679	1	0.944186	99.041
GOTERM_BP_FAT	GO:0032273~positive regulation of protein polymerization	4	0.281294	0.462488	847228581027857	1049	23	9658	1.60119	1	0.991489	99.9988
GOTERM_BP_FAT	GO:0031334~positive regulation of protein complex assembly	4	0.281294	0.646666	847228581027857	1049	30	9658	1.22758	1	0.998473	100
Annotation Cluster 77	Enrichment Score: 0.9628050023539685
Category	Term	Count	%	PValue	Genes	List Total	Pop Hits	Pop Total	Fold Enrichment	Bonferroni	Benjamini	FDR
GOTERM_MF_FAT	GO:0008238~exopeptidase activity	13	0.914205	0.01672	5.92721e+56	994	57	9211	2.11343	1	0.608832	23.7921
GOTERM_MF_FAT	GO:0004180~carboxypeptidase activity	7	0.492264	0.0456686	5.92726e+31	994	25	9211	2.59465	1	0.771648	52.9161
SP_PIR_KEYWORDS	carboxypeptidase	6	0.421941	0.0631632	5.92726e+26	1397	21	13223	2.70437	1	0.489914	62.2502
GOTERM_MF_FAT	GO:0008235~metalloexopeptidase activity	6	0.421941	0.108845	5.70948e+26	994	24	9211	2.31665	1	0.901984	84.385
INTERPRO	IPR003146:Proteinase inhibitor, carboxypeptidase propeptide	3	0.21097	0.126758	5709413611358	1250	6	11754	4.7016	1	0.986993	89.9332
PIR_SUPERFAMILY	PIRSF001128:carboxypeptidase	3	0.21097	0.148588	5709413611358	589	6	5036	4.27504	1	0.999987	90.8472
INTERPRO	IPR000834:Peptidase M14, carboxypeptidase A	4	0.281294	0.180224	5.70941e+17	1250	14	11754	2.68663	1	0.995424	96.5478
SMART	SM00631:Zn_pept	4	0.281294	0.180254	5.70941e+17	692	14	6501	2.68415	1	0.89146	93.1929
GOTERM_MF_FAT	GO:0004181~metallocarboxypeptidase activity	4	0.281294	0.244653	5.70941e+17	994	16	9211	2.31665	1	0.963596	98.9124
SP_PIR_KEYWORDS	metalloprotease	13	0.914205	0.29965	2.06339e+56	1397	95	13223	1.29525	1	0.82231	99.5098
Annotation Cluster 78	Enrichment Score: 0.9580457753475055
Category	Term	Count	%	PValue	Genes	List Total	Pop Hits	Pop Total	Fold Enrichment	Bonferroni	Benjamini	FDR
SMART	SM00041:CT	4	0.281294	0.103264	4.68135e+15	692	11	6501	3.41618	1	0.813927	77.0894
INTERPRO	IPR006207:Cystine knot, C-terminal	4	0.281294	0.10327	4.68135e+15	1250	11	11754	3.41935	1	0.981707	84.2186
UP_SEQ_FEATURE	domain:CTCK	4	0.281294	0.125297	4.68135e+15	1395	12	13210	3.15651	1	0.999635	91.3795
Annotation Cluster 79	Enrichment Score: 0.9571426218431578
Category	Term	Count	%	PValue	Genes	List Total	Pop Hits	Pop Total	Fold Enrichment	Bonferroni	Benjamini	FDR
SMART	SM00200:SEA	4	0.281294	0.0812869	3.75791e+18	692	10	6501	3.7578	1	0.76443	68.2166
INTERPRO	IPR000082:SEA	4	0.281294	0.0812986	3.75791e+18	1250	10	11754	3.76128	1	0.971485	76.2196
UP_SEQ_FEATURE	domain:SEA	3	0.21097	0.203455	375790566673339	1395	8	13210	3.55108	1	0.999986	98.4467
Annotation Cluster 80	Enrichment Score: 0.9538106813328597
Category	Term	Count	%	PValue	Genes	List Total	Pop Hits	Pop Total	Fold Enrichment	Bonferroni	Benjamini	FDR
SMART	SM00055:FCH	5	0.351617	0.0817703	5.48749e+23	692	16	6501	2.93578	1	0.74892	68.4419
INTERPRO	IPR001060:Fps/Fes/Fer/CIP4 homology	5	0.351617	0.081813	5.48749e+23	1250	16	11754	2.9385	1	0.969728	76.4442
UP_SEQ_FEATURE	domain:FCH	4	0.281294	0.20566	5.48749e+18	1395	15	13210	2.52521	1	0.999986	98.5235
Annotation Cluster 81	Enrichment Score: 0.9503261492722234
Category	Term	Count	%	PValue	Genes	List Total	Pop Hits	Pop Total	Fold Enrichment	Bonferroni	Benjamini	FDR
GOTERM_BP_FAT	GO:0007010~cytoskeleton organization	52	3.65682	0.0233081	5.57855e+224	1049	357	9658	1.34106	1	0.506936	35.0572
GOTERM_BP_FAT	GO:0030036~actin cytoskeleton organization	24	1.68776	0.240144	5.57857e+102	1049	181	9658	1.2208	1	0.953177	99.3438
GOTERM_BP_FAT	GO:0030029~actin filament-based process	25	1.75809	0.251792	5.57853e+106	1049	191	9658	1.20509	1	0.957265	99.5055
Annotation Cluster 82	Enrichment Score: 0.9359364871311295
Category	Term	Count	%	PValue	Genes	List Total	Pop Hits	Pop Total	Fold Enrichment	Bonferroni	Benjamini	FDR
GOTERM_BP_FAT	GO:0006937~regulation of muscle contraction	11	0.773558	0.0233621	6.75237e+43	1049	46	9658	2.20164	1	0.504761	35.1228
GOTERM_BP_FAT	GO:0006940~regulation of smooth muscle contraction	7	0.492264	0.0469372	3.67313e+27	1049	25	9658	2.57792	1	0.655268	58.5182
GOTERM_BP_FAT	GO:0045987~positive regulation of smooth muscle contraction	4	0.281294	0.160151	3.67321e+15	1049	13	9658	2.83288	1	0.90142	95.9013
GOTERM_BP_FAT	GO:0045933~positive regulation of muscle contraction	4	0.281294	0.217635	3.67321e+15	1049	15	9658	2.45516	1	0.940784	98.8804
GOTERM_BP_FAT	GO:0007205~activation of protein kinase C activity by G-protein coupled receptor protein signaling pathway	4	0.281294	0.547054	5.11962e+16	1049	26	9658	1.41644	1	0.995583	99.9999
Annotation Cluster 83	Enrichment Score: 0.923931738546821
Category	Term	Count	%	PValue	Genes	List Total	Pop Hits	Pop Total	Fold Enrichment	Bonferroni	Benjamini	FDR
GOTERM_BP_FAT	GO:0001822~kidney development	15	1.05485	0.07284	6.29956e+58	1049	85	9658	1.62474	1	0.755031	74.9489
GOTERM_BP_FAT	GO:0001655~urogenital system development	16	1.12518	0.093383	6.29956e+62	1049	96	9658	1.53448	1	0.807408	83.3765
GOTERM_BP_FAT	GO:0001657~ureteric bud development	7	0.492264	0.112603	6.29918e+25	1049	31	9658	2.07897	1	0.838352	88.7697
GOTERM_BP_FAT	GO:0001656~metanephros development	7	0.492264	0.263078	6.29918e+25	1049	40	9658	1.6112	1	0.959549	99.6255
Annotation Cluster 84	Enrichment Score: 0.9184167740735342
Category	Term	Count	%	PValue	Genes	List Total	Pop Hits	Pop Total	Fold Enrichment	Bonferroni	Benjamini	FDR
UP_SEQ_FEATURE	domain:LDL-receptor class A	5	0.351617	0.0221888	7.29669e+19	1395	11	13210	4.30433	1	0.971491	33.6899
SMART	SM00192:LDLa	9	0.632911	0.0232447	7.29669e+36	692	34	6501	2.48678	0.99951	0.499799	27.2378
INTERPRO	IPR002172:Low density lipoprotein-receptor, class A, cysteine-rich	9	0.632911	0.0233532	7.29669e+36	1250	34	11754	2.48908	1	0.862301	32.9859
UP_SEQ_FEATURE	domain:LDL-receptor class A 2	4	0.281294	0.384674	6.76833e+16	1395	21	13210	1.80372	1	1	99.9862
UP_SEQ_FEATURE	domain:LDL-receptor class A 1	4	0.281294	0.384674	6.76833e+16	1395	21	13210	1.80372	1	1	99.9862
UP_SEQ_FEATURE	domain:LDL-receptor class A 4	3	0.21097	0.405576	6768333926020	1395	13	13210	2.18528	1	1	99.9927
UP_SEQ_FEATURE	domain:LDL-receptor class A 3	3	0.21097	0.515252	6768333926020	1395	16	13210	1.77554	1	1	99.9998
Annotation Cluster 85	Enrichment Score: 0.9164058066660039
Category	Term	Count	%	PValue	Genes	List Total	Pop Hits	Pop Total	Fold Enrichment	Bonferroni	Benjamini	FDR
INTERPRO	IPR004367:Cyclin, C-terminal	5	0.351617	0.0414453	9.13389e+17	1250	13	11754	3.61662	1	0.923605	51.1784
PIR_SUPERFAMILY	PIRSF001771:cyclin, A/B/D/E types	4	0.281294	0.056581	9133890891898	589	8	5036	4.27504	1	0.997771	57.9279
INTERPRO	IPR014400:Cyclin, A/B/D/E	4	0.281294	0.0616353	9133890891898	1250	9	11754	4.1792	1	0.959345	65.9585
PIR_SUPERFAMILY	PIRSF001771:Cyclin_A_B_D_E	4	0.281294	0.0777124	9133890891898	589	9	5036	3.80004	1	0.999303	69.9564
SP_PIR_KEYWORDS	cyclin	9	0.632911	0.0779414	1.03091e+32	1397	43	13223	1.98111	1	0.519329	70.2278
INTERPRO	IPR006671:Cyclin, N-terminal	6	0.421941	0.152399	9.13389e+20	1250	27	11754	2.0896	1	0.991571	93.9235
INTERPRO	IPR013763:Cyclin-related	6	0.421941	0.228495	9.13389e+20	1250	31	11754	1.81997	1	0.998091	98.765
INTERPRO	IPR006670:Cyclin	6	0.421941	0.27003	9.13389e+20	1250	33	11754	1.70967	1	0.998937	99.5163
SMART	SM00385:CYCLIN	6	0.421941	0.270088	9.13389e+20	692	33	6501	1.70809	1	0.936512	98.5828
KEGG_PATHWAY	hsa04115:p53 signaling pathway	10	0.703235	0.30827	8.49391e+37	436	61	3618	1.36035	1	0.915476	98.9368
Annotation Cluster 86	Enrichment Score: 0.9129386196598795
Category	Term	Count	%	PValue	Genes	List Total	Pop Hits	Pop Total	Fold Enrichment	Bonferroni	Benjamini	FDR
GOTERM_MF_FAT	GO:0004869~cysteine-type endopeptidase inhibitor activity	7	0.492264	0.0313033	2.58168e+25	994	23	9211	2.82027	1	0.698597	40.0995
GOTERM_MF_FAT	GO:0043028~caspase regulator activity	5	0.351617	0.231108	8.79726e+20	994	23	9211	2.01448	1	0.957879	98.5518
GOTERM_MF_FAT	GO:0043027~caspase inhibitor activity	3	0.21097	0.25222	258163323309	994	9	9211	3.08887	1	0.966548	99.0753
Annotation Cluster 87	Enrichment Score: 0.9038401853118492
Category	Term	Count	%	PValue	Genes	List Total	Pop Hits	Pop Total	Fold Enrichment	Bonferroni	Benjamini	FDR
GOTERM_BP_FAT	GO:0030194~positive regulation of blood coagulation	6	0.421941	0.00129075	2.14721e+22	1049	9	9658	6.13791	0.988803	0.111494	2.33629
GOTERM_BP_FAT	GO:0050820~positive regulation of coagulation	6	0.421941	0.00613909	2.14721e+22	1049	12	9658	4.60343	1	0.280718	10.6591
BIOCARTA	h_extrinsicPathway:Extrinsic Prothrombin Activation Pathway	5	0.351617	0.0408685	4.62215e+18	148	11	1152	3.53808	0.999654	0.981406	40.4921
GOTERM_BP_FAT	GO:0051917~regulation of fibrinolysis	3	0.21097	0.212517	21615345350	1049	8	9658	3.45257	1	0.937326	98.7385
GOTERM_BP_FAT	GO:0052547~regulation of peptidase activity	11	0.773558	0.224224	8.79773e+40	1049	70	9658	1.44679	1	0.944186	99.041
GOTERM_BP_FAT	GO:0043281~regulation of caspase activity	10	0.703235	0.240398	8.79773e+37	1049	63	9658	1.46141	1	0.952892	99.3479
GOTERM_BP_FAT	GO:0052548~regulation of endopeptidase activity	10	0.703235	0.285023	8.79773e+37	1049	66	9658	1.39498	1	0.965361	99.7847
GOTERM_BP_FAT	GO:0051336~regulation of hydrolase activity	28	1.96906	0.541421	5.57853e+113	1049	250	9658	1.03117	1	0.995293	99.9999
GOTERM_BP_FAT	GO:0010952~positive regulation of peptidase activity	6	0.421941	0.548231	8.79773e+23	1049	45	9658	1.22758	1	0.995614	100
GOTERM_BP_FAT	GO:0043280~positive regulation of caspase activity	6	0.421941	0.548231	8.79773e+23	1049	45	9658	1.22758	1	0.995614	100
GOTERM_BP_FAT	GO:0006919~activation of caspase activity	5	0.351617	0.663853	8.79773e+18	1049	41	9658	1.12279	1	0.998811	100
Annotation Cluster 88	Enrichment Score: 0.9024290968273225
Category	Term	Count	%	PValue	Genes	List Total	Pop Hits	Pop Total	Fold Enrichment	Bonferroni	Benjamini	FDR
GOTERM_BP_FAT	GO:0051453~regulation of intracellular pH	5	0.351617	0.0442885	2.70351e+22	1049	13	9658	3.5411	1	0.642901	56.3566
GOTERM_BP_FAT	GO:0030641~regulation of cellular pH	5	0.351617	0.0568418	2.70351e+22	1049	14	9658	3.28817	1	0.70441	65.7376
GOTERM_BP_FAT	GO:0030004~cellular monovalent inorganic cation homeostasis	6	0.421941	0.0579325	2.70352e+25	1049	20	9658	2.76206	1	0.707173	66.4557
GOTERM_BP_FAT	GO:0045851~pH reduction	4	0.281294	0.0854963	1.18216e+17	1049	10	9658	3.68275	1	0.788644	80.5208
GOTERM_BP_FAT	GO:0051452~intracellular pH reduction	4	0.281294	0.0854963	1.18216e+17	1049	10	9658	3.68275	1	0.788644	80.5208
GOTERM_BP_FAT	GO:0055067~monovalent inorganic cation homeostasis	7	0.492264	0.0871527	2.70352e+29	1049	29	9658	2.22235	1	0.790347	81.1565
GOTERM_BP_FAT	GO:0006885~regulation of pH	6	0.421941	0.0961775	2.70351e+26	1049	23	9658	2.40179	1	0.811157	84.2898
GOTERM_BP_FAT	GO:0015992~proton transport	4	0.281294	0.91288	2.70352e+17	1049	49	9658	0.751581	1	0.999993	100
GOTERM_BP_FAT	GO:0006818~hydrogen transport	4	0.281294	0.925965	2.70352e+17	1049	51	9658	0.722107	1	0.999996	100
Annotation Cluster 89	Enrichment Score: 0.8998776187869854
Category	Term	Count	%	PValue	Genes	List Total	Pop Hits	Pop Total	Fold Enrichment	Bonferroni	Benjamini	FDR
INTERPRO	IPR001111:Transforming growth factor beta (TGFb), N-terminal	5	0.351617	0.0667587	7.04265e+18	1250	15	11754	3.1344	1	0.959387	68.9734
GOTERM_MF_FAT	GO:0008083~growth factor activity	17	1.1955	0.0685919	2.65752e+65	994	100	9211	1.57532	1	0.848607	68.1784
INTERPRO	IPR015615:Transforming growth factor-beta-related	6	0.421941	0.0897109	7.04227e+22	1250	23	11754	2.45301	1	0.972686	79.6508
SMART	SM00204:TGFB	6	0.421941	0.119032	7.04227e+22	692	25	6501	2.25468	1	0.832253	81.9751
INTERPRO	IPR017948:Transforming growth factor beta, conserved site	6	0.421941	0.119105	7.04227e+22	1250	25	11754	2.25677	1	0.985243	88.3298
INTERPRO	IPR001839:Transforming growth factor beta	6	0.421941	0.119105	7.04227e+22	1250	25	11754	2.25677	1	0.985243	88.3298
SP_PIR_KEYWORDS	growth factor	13	0.914205	0.133916	5.15427e+50	1397	80	13223	1.53811	1	0.633908	88.3129
PIR_SUPERFAMILY	PIRSF800009:TGF-beta-like cysteine-knot cytokine	4	0.281294	0.251615	2.65765e+15	589	15	5036	2.28002	1	1	98.6544
GOTERM_BP_FAT	GO:0045778~positive regulation of ossification	4	0.281294	0.340707	70427068652650	1049	19	9658	1.93829	1	0.97702	99.9512
Annotation Cluster 90	Enrichment Score: 0.8843622404307081
Category	Term	Count	%	PValue	Genes	List Total	Pop Hits	Pop Total	Fold Enrichment	Bonferroni	Benjamini	FDR
GOTERM_BP_FAT	GO:0042490~mechanoreceptor differentiation	6	0.421941	0.0822721	4.91169e+22	1049	22	9658	2.51096	1	0.778667	79.2247
GOTERM_BP_FAT	GO:0060113~inner ear receptor cell differentiation	5	0.351617	0.143467	4.91169e+18	1049	19	9658	2.42286	1	0.884032	94.125
GOTERM_BP_FAT	GO:0042491~auditory receptor cell differentiation	4	0.281294	0.188326	491182552834646	1049	14	9658	2.63053	1	0.920931	97.8052
Annotation Cluster 91	Enrichment Score: 0.8843151531743946
Category	Term	Count	%	PValue	Genes	List Total	Pop Hits	Pop Total	Fold Enrichment	Bonferroni	Benjamini	FDR
UP_SEQ_FEATURE	cross-link:Isoglutamyl cysteine thioester (Cys-Gln)	3	0.21097	0.0577595	27185858	1395	4	13210	7.10215	1	0.993663	66.3542
SP_PIR_KEYWORDS	thioester bond	3	0.21097	0.0578076	27185858	1397	4	13223	7.09896	1	0.464348	58.8965
PIR_SUPERFAMILY	PIRSF001635:alpha-2-macroglobulin	3	0.21097	0.107108	27185858	589	5	5036	5.13005	1	0.999865	81.4372
INTERPRO	IPR019565:Alpha-2-macroglobulin, thiol-ester bond-forming	3	0.21097	0.126758	27185858	1250	6	11754	4.7016	1	0.986993	89.9332
INTERPRO	IPR002890:Alpha-2-macroglobulin, N-terminal	3	0.21097	0.165392	27185858	1250	7	11754	4.02994	1	0.993108	95.3225
INTERPRO	IPR019742:Alpha-2-macroglobulin, conserved site	3	0.21097	0.165392	27185858	1250	7	11754	4.02994	1	0.993108	95.3225
INTERPRO	IPR011625:Alpha-2-macroglobulin, N-terminal 2	3	0.21097	0.165392	27185858	1250	7	11754	4.02994	1	0.993108	95.3225
INTERPRO	IPR009048:Alpha-macroglobulin, receptor-binding	3	0.21097	0.165392	27185858	1250	7	11754	4.02994	1	0.993108	95.3225
INTERPRO	IPR001599:Alpha-2-macroglobulin	3	0.21097	0.20568	27185858	1250	8	11754	3.5262	1	0.997206	97.9768
INTERPRO	IPR011626:A-macroglobulin complement component	3	0.21097	0.20568	27185858	1250	8	11754	3.5262	1	0.997206	97.9768
Annotation Cluster 92	Enrichment Score: 0.8806654307820404
Category	Term	Count	%	PValue	Genes	List Total	Pop Hits	Pop Total	Fold Enrichment	Bonferroni	Benjamini	FDR
GOTERM_BP_FAT	GO:0009309~amine biosynthetic process	14	0.984529	0.0207481	6.72352e+57	1049	65	9658	1.98302	1	0.481568	31.8699
GOTERM_BP_FAT	GO:0008652~cellular amino acid biosynthetic process	10	0.703235	0.0628871	8.65945e+40	1049	47	9658	1.95891	1	0.722942	69.5419
GOTERM_BP_FAT	GO:0009084~glutamine family amino acid biosynthetic process	5	0.351617	0.0869701	8.65945e+21	1049	16	9658	2.87714	1	0.791244	81.0874
GOTERM_BP_FAT	GO:0016053~organic acid biosynthetic process	15	1.05485	0.59004	5.15579e+63	1049	133	9658	1.03837	1	0.997125	100
GOTERM_BP_FAT	GO:0046394~carboxylic acid biosynthetic process	15	1.05485	0.59004	5.15579e+63	1049	133	9658	1.03837	1	0.997125	100
Annotation Cluster 93	Enrichment Score: 0.8757344508578643
Category	Term	Count	%	PValue	Genes	List Total	Pop Hits	Pop Total	Fold Enrichment	Bonferroni	Benjamini	FDR
SP_PIR_KEYWORDS	Aminotransferase	6	0.421941	0.0525178	6.49026e+23	1397	20	13223	2.83958	1	0.437209	55.3128
GOTERM_MF_FAT	GO:0016769~transferase activity, transferring nitrogenous groups	7	0.492264	0.0541623	6.49026e+27	994	26	9211	2.49485	1	0.811584	59.233
GOTERM_MF_FAT	GO:0008483~transaminase activity	6	0.421941	0.056581	6.49026e+23	994	20	9211	2.77998	1	0.817719	60.8808
INTERPRO	IPR015421:Pyridoxal phosphate-dependent transferase, major region, subdomain 1	7	0.492264	0.131501	5.13803e+30	1250	33	11754	1.99462	1	0.988158	90.8203
SP_PIR_KEYWORDS	pyridoxal phosphate	9	0.632911	0.178135	5.13803e+38	1397	52	13223	1.63822	1	0.699704	94.6557
GOTERM_MF_FAT	GO:0019842~vitamin binding	15	1.05485	0.206339	2.34851e+64	994	102	9211	1.36274	1	0.948631	97.5861
GOTERM_MF_FAT	GO:0030170~pyridoxal phosphate binding	7	0.492264	0.356119	5.13803e+30	994	45	9211	1.44147	1	0.987706	99.917
GOTERM_MF_FAT	GO:0070279~vitamin B6 binding	7	0.492264	0.356119	5.13803e+30	994	45	9211	1.44147	1	0.987706	99.917
Annotation Cluster 94	Enrichment Score: 0.8744990055525785
Category	Term	Count	%	PValue	Genes	List Total	Pop Hits	Pop Total	Fold Enrichment	Bonferroni	Benjamini	FDR
UP_SEQ_FEATURE	domain:MAM	4	0.281294	0.101612	1.61357e+17	1395	11	13210	3.44347	1	0.999244	85.9404
INTERPRO	IPR000998:MAM	4	0.281294	0.153023	1.61357e+17	1250	13	11754	2.89329	1	0.990391	93.9989
SMART	SM00137:MAM	4	0.281294	0.153038	1.61357e+17	692	13	6501	2.89062	1	0.86374	89.4139
Annotation Cluster 95	Enrichment Score: 0.8614238877170196
Category	Term	Count	%	PValue	Genes	List Total	Pop Hits	Pop Total	Fold Enrichment	Bonferroni	Benjamini	FDR
UP_SEQ_FEATURE	domain:LIM zinc-binding	6	0.421941	0.0157924	5.75536e+27	1395	15	13210	3.78781	1	0.937724	25.282
INTERPRO	IPR002938:Monooxygenase, FAD-binding	4	0.281294	0.0187028	5.75536e+18	1250	6	11754	6.2688	1	0.810492	27.3708
UP_SEQ_FEATURE	domain:CH	6	0.421941	0.372997	5.75536e+26	1395	38	13210	1.49519	1	1	99.9806
SP_PIR_KEYWORDS	LIM domain	8	0.562588	0.378537	5.75534e+35	1397	56	13223	1.35218	1	0.867458	99.9177
INTERPRO	IPR001781:Zinc finger, LIM-type	8	0.562588	0.403179	5.75534e+35	1250	57	11754	1.31975	1	0.999841	99.984
SMART	SM00132:LIM	8	0.562588	0.40345	5.75534e+35	692	57	6501	1.31853	1	0.967151	99.9074
Annotation Cluster 96	Enrichment Score: 0.853902922807927
Category	Term	Count	%	PValue	Genes	List Total	Pop Hits	Pop Total	Fold Enrichment	Bonferroni	Benjamini	FDR
GOTERM_BP_FAT	GO:0051181~cofactor transport	6	0.421941	0.0303241	2.34811e+24	1049	17	9658	3.24948	1	0.564051	43.0853
GOTERM_BP_FAT	GO:0051180~vitamin transport	6	0.421941	0.0579325	2.34811e+24	1049	20	9658	2.76206	1	0.707173	66.4557
GOTERM_BP_FAT	GO:0015695~organic cation transport	5	0.351617	0.1044	5.00266e+18	1049	17	9658	2.7079	1	0.823642	86.7095
GOTERM_BP_FAT	GO:0015879~carnitine transport	3	0.21097	0.13135	78865836584	1049	6	9658	4.60343	1	0.867845	92.4025
GOTERM_BP_FAT	GO:0015838~betaine transport	3	0.21097	0.13135	78865836584	1049	6	9658	4.60343	1	0.867845	92.4025
GOTERM_BP_FAT	GO:0015697~quaternary ammonium group transport	3	0.21097	0.296984	78865836584	1049	10	9658	2.76206	1	0.968634	99.8419
GOTERM_MF_FAT	GO:0051183~vitamin transporter activity	3	0.21097	0.376776	11323565836584	994	12	9211	2.31665	1	0.988824	99.9509
GOTERM_MF_FAT	GO:0051184~cofactor transporter activity	3	0.21097	0.416573	11323565836584	994	13	9211	2.13845	1	0.991839	99.9831
Annotation Cluster 97	Enrichment Score: 0.8464360733058206
Category	Term	Count	%	PValue	Genes	List Total	Pop Hits	Pop Total	Fold Enrichment	Bonferroni	Benjamini	FDR
GOTERM_BP_FAT	GO:0009247~glycolipid biosynthetic process	4	0.281294	0.0649252	7.35795e+16	1049	9	9658	4.09194	1	0.728644	70.7318
GOTERM_BP_FAT	GO:0006643~membrane lipid metabolic process	12	0.843882	0.081776	1.09247e+50	1049	64	9658	1.72629	1	0.778249	79.0182
GOTERM_BP_FAT	GO:0046519~sphingoid metabolic process	8	0.562588	0.0886591	7.35795e+32	1049	36	9658	2.04597	1	0.793009	81.7177
GOTERM_BP_FAT	GO:0006664~glycolipid metabolic process	6	0.421941	0.127251	7.35795e+24	1049	25	9658	2.20965	1	0.862024	91.7189
GOTERM_BP_FAT	GO:0046466~membrane lipid catabolic process	4	0.281294	0.133413	1.09249e+16	1049	12	9658	3.06895	1	0.870113	92.7262
GOTERM_BP_FAT	GO:0046513~ceramide biosynthetic process	4	0.281294	0.133413	7.35795e+16	1049	12	9658	3.06895	1	0.870113	92.7262
GOTERM_BP_FAT	GO:0030149~sphingolipid catabolic process	4	0.281294	0.133413	1.09249e+16	1049	12	9658	3.06895	1	0.870113	92.7262
GOTERM_BP_FAT	GO:0006672~ceramide metabolic process	7	0.492264	0.141376	7.35795e+28	1049	33	9658	1.95297	1	0.881049	93.8569
GOTERM_BP_FAT	GO:0046467~membrane lipid biosynthetic process	6	0.421941	0.144303	7.35795e+25	1049	26	9658	2.12466	1	0.883612	94.2291
GOTERM_BP_FAT	GO:0046520~sphingoid biosynthetic process	4	0.281294	0.160151	7.35795e+16	1049	13	9658	2.83288	1	0.90142	95.9013
GOTERM_BP_FAT	GO:0001573~ganglioside metabolic process	3	0.21097	0.171134	369688693074	1049	7	9658	3.9458	1	0.908483	96.7789
GOTERM_BP_FAT	GO:0006665~sphingolipid metabolic process	10	0.703235	0.198525	1.09247e+41	1049	60	9658	1.53448	1	0.927699	98.2587
GOTERM_BP_FAT	GO:0006687~glycosphingolipid metabolic process	5	0.351617	0.210618	7.35795e+19	1049	22	9658	2.09247	1	0.937895	98.6816
GOTERM_BP_FAT	GO:0006688~glycosphingolipid biosynthetic process	3	0.21097	0.212517	735795148869	1049	8	9658	3.45257	1	0.937326	98.7385
GOTERM_BP_FAT	GO:0030148~sphingolipid biosynthetic process	5	0.351617	0.284589	7.35795e+20	1049	25	9658	1.84137	1	0.965822	99.7823
Annotation Cluster 98	Enrichment Score: 0.8315215550690234
Category	Term	Count	%	PValue	Genes	List Total	Pop Hits	Pop Total	Fold Enrichment	Bonferroni	Benjamini	FDR
GOTERM_BP_FAT	GO:0045859~regulation of protein kinase activity	43	3.02391	0.0153581	8.44511e+176	1049	277	9658	1.42922	1	0.442954	24.6693
GOTERM_BP_FAT	GO:0051338~regulation of transferase activity	46	3.23488	0.0166185	8.44511e+191	1049	302	9658	1.40237	1	0.455088	26.4148
GOTERM_BP_FAT	GO:0043549~regulation of kinase activity	43	3.02391	0.0293308	8.44511e+176	1049	289	9658	1.36988	1	0.55465	42.0087
GOTERM_BP_FAT	GO:0042325~regulation of phosphorylation	52	3.65682	0.0377656	1.15215e+213	1049	368	9658	1.30097	1	0.613103	50.5704
GOTERM_BP_FAT	GO:0032147~activation of protein kinase activity	16	1.12518	0.0424731	1.15923e+64	1049	86	9658	1.7129	1	0.632	54.8141
GOTERM_BP_FAT	GO:0019220~regulation of phosphate metabolic process	53	3.72714	0.0459813	1.15215e+217	1049	381	9658	1.28074	1	0.649875	57.7501
GOTERM_BP_FAT	GO:0051174~regulation of phosphorus metabolic process	53	3.72714	0.0459813	1.15215e+217	1049	381	9658	1.28074	1	0.649875	57.7501
GOTERM_BP_FAT	GO:0045860~positive regulation of protein kinase activity	22	1.54712	0.296747	8.44511e+87	1049	170	9658	1.19148	1	0.968837	99.8409
GOTERM_BP_FAT	GO:0051347~positive regulation of transferase activity	23	1.61744	0.356981	8.44511e+93	1049	185	9658	1.14464	1	0.979918	99.9691
GOTERM_BP_FAT	GO:0033674~positive regulation of kinase activity	22	1.54712	0.375952	8.44511e+87	1049	178	9658	1.13793	1	0.98274	99.9821
GOTERM_BP_FAT	GO:0043085~positive regulation of catalytic activity	43	3.02391	0.476749	8.44511e+169	1049	382	9658	1.03637	1	0.992372	99.9993
GOTERM_BP_FAT	GO:0043405~regulation of MAP kinase activity	13	0.914205	0.497696	8.44511e+54	1049	107	9658	1.11859	1	0.993188	99.9997
GOTERM_BP_FAT	GO:0000165~MAPKKK cascade	17	1.1955	0.557356	8.44512e+70	1049	149	9658	1.05045	1	0.996059	100
GOTERM_BP_FAT	GO:0044093~positive regulation of molecular function	46	3.23488	0.640505	8.44511e+181	1049	432	9658	0.98036	1	0.998395	100
GOTERM_BP_FAT	GO:0043406~positive regulation of MAP kinase activity	8	0.562588	0.71872	8.44515e+32	1049	75	9658	0.982065	1	0.999448	100
GOTERM_BP_FAT	GO:0000187~activation of MAPK activity	6	0.421941	0.806112	8.44515e+24	1049	61	9658	0.905593	1	0.999883	100
Annotation Cluster 99	Enrichment Score: 0.8291542102264753
Category	Term	Count	%	PValue	Genes	List Total	Pop Hits	Pop Total	Fold Enrichment	Bonferroni	Benjamini	FDR
GOTERM_CC_FAT	GO:0014704~intercalated disc	4	0.281294	0.0952936	1.83223e+16	1000	10	8798	3.5192	1	0.689594	76.4896
GOTERM_CC_FAT	GO:0005916~fascia adherens	3	0.21097	0.184173	183237281000	1000	7	8798	3.77057	1	0.830233	94.7273
GOTERM_CC_FAT	GO:0005913~cell-cell adherens junction	6	0.421941	0.185459	1.83258e+22	1000	27	8798	1.95511	1	0.822445	94.8461
Annotation Cluster 100	Enrichment Score: 0.8279785576601418
Category	Term	Count	%	PValue	Genes	List Total	Pop Hits	Pop Total	Fold Enrichment	Bonferroni	Benjamini	FDR
UP_SEQ_FEATURE	nucleotide phosphate-binding region:ATP	97	6.82138	0.0542425	157285,1195,124923,5230,8317,164045,9928,11011,9931,11325,23303,84083,203,56992,1184,9448,1182,4215,55226,4216,80221,11004,8195,374654,1612,282974,10420,4640,5613,1841,9775,6583,6584,10112,9429,375449,57144,4174,55872,4176,699,1111,10212,5566,3832,1778,10494,617,55137,8573,24137,7301,343450,55601,5587,701,5889,780,5603,5705,9060,5608,2264,9401,7444,445,9212,6198,6199,4751,4646,3643,4649,55510,165…	1395	777	13210	1.18217	1	0.992273	63.9792
SP_PIR_KEYWORDS	nucleotide-binding	160	11.2518	0.0813868	157285,1195,10347,124923,9343,5230,57176,8317,164045,9928,51174,11011,63893,9931,8877,10131,11325,23303,203,84083,56992,1184,9448,55224,1182,55226,4215,4216,80221,8395,11004,8195,11000,134111,374654,1612,282974,10420,1915,4640,5613,8766,150465,1841,9775,6583,6584,10112,375449,9429,57144,64284,55930,4174,92335,2634,55872,699,5243,4176,116987,2633,2635,5566,1111,326624,10212,3832,11020,1778,2774,49…	1397	1359	13223	1.11438	1	0.520837	71.8463
GOTERM_MF_FAT	GO:0017076~purine nucleotide binding	182	12.7989	0.0836188	157285,1195,10347,9343,124923,5230,7498,57176,8317,164045,51004,64118,22974,9928,51174,11011,63893,9931,8877,10131,11325,23303,57761,2329,4199,203,84083,56992,1184,9448,55224,1182,55226,4215,4216,80221,8395,11004,8195,2330,134111,374654,1612,26872,282974,316,10420,1915,4640,5613,8766,150465,1841,9775,6583,6584,10112,375449,9429,57144,64284,55930,4174,92335,2634,55872,699,5243,4176,116987,2633,263…	994	1530	9211	1.1023	1	0.87018	75.5153
GOTERM_MF_FAT	GO:0030554~adenyl nucleotide binding	151	10.6188	0.0963598	157285,1195,10347,124923,5230,7498,57176,8317,51004,164045,64118,22974,9928,11011,63893,9931,8877,10131,11325,23303,57761,2329,4199,203,84083,56992,1184,9448,55224,1182,55226,4215,4216,80221,8395,11004,8195,2330,134111,374654,1612,26872,282974,10420,316,4640,5613,150465,1841,9775,6583,6584,10112,375449,9429,57144,55930,4174,92335,55872,699,5243,4176,1111,10212,5566,3832,26278,1778,491,2180,10494,…	994	1264	9211	1.10701	1	0.888472	80.4606
GOTERM_MF_FAT	GO:0001882~nucleoside binding	152	10.6892	0.130367	157285,1195,10347,124923,5230,7498,57176,8317,51004,164045,64118,22974,9928,11011,63893,9931,8877,10131,11325,23303,57761,2329,4199,203,84083,56992,1184,9448,55224,1182,55226,4215,4216,80221,8395,11004,8195,2330,134111,374654,1612,26872,282974,10420,316,4640,5613,150465,1841,9775,6583,6584,10112,375449,9429,57144,55930,4174,92335,55872,699,5243,4176,1111,10212,5566,3832,26278,1778,491,2180,10494,…	994	1291	9211	1.09103	1	0.918908	89.4693
GOTERM_MF_FAT	GO:0001883~purine nucleoside binding	151	10.6188	0.141273	157285,1195,10347,124923,5230,7498,57176,8317,51004,164045,64118,22974,9928,11011,63893,9931,8877,10131,11325,23303,57761,2329,4199,203,84083,56992,1184,9448,55224,1182,55226,4215,4216,80221,8395,11004,8195,2330,134111,374654,1612,26872,282974,10420,316,4640,5613,150465,1841,9775,6583,6584,10112,375449,9429,57144,55930,4174,92335,55872,699,5243,4176,1111,10212,5566,3832,26278,1778,491,2180,10494,…	994	1283	9211	1.09061	1	0.924252	91.4071
SP_PIR_KEYWORDS	atp-binding	125	8.79044	0.160255	157285,1195,10347,124923,5230,57176,8317,164045,9928,11011,9931,63893,8877,10131,11325,23303,84083,203,56992,1184,9448,55224,1182,55226,4215,4216,80221,8395,11004,8195,374654,134111,1612,282974,10420,4640,5613,150465,1841,9775,6583,6584,10112,375449,9429,57144,55930,4174,92335,55872,699,4176,5243,1111,10212,5566,3832,1778,491,2180,10494,9031,617,55902,55137,115,8573,7301,24137,343450,1244,55601,5…	1397	1079	13223	1.09653	1	0.689751	92.6303
UP_SEQ_FEATURE	binding site:ATP	53	3.72714	0.176838	1.57285e+231	1395	433	13210	1.15909	1	0.999971	97.1645
GOTERM_MF_FAT	GO:0000166~nucleotide binding	206	14.4866	0.19675	1195,10347,124923,7498,5230,8317,51174,51179,8877,11325,57761,2329,84083,203,1184,55224,3291,1182,55226,4215,4216,80221,81691,2330,134111,374654,10873,316,4640,5613,8766,150465,1841,3945,375449,64284,55930,92335,55872,5243,10212,3832,10494,51285,617,6102,55902,55137,115,7846,847,10381,55601,701,27035,128,5603,11232,5705,9060,5608,2264,4552,7444,445,6198,115701,9212,6199,8634,7984,4751,3248,4646,2…	994	1805	9211	1.05757	1	0.94911	97.0707
GOTERM_MF_FAT	GO:0032555~purine ribonucleotide binding	168	11.8143	0.203784	157285,1195,10347,124923,9343,5230,57176,8317,164045,22974,9928,51174,11011,63893,9931,8877,10131,11325,23303,57761,4199,203,84083,56992,1184,9448,55224,1182,55226,4215,4216,80221,8395,11004,8195,134111,374654,1612,282974,10420,1915,4640,5613,8766,150465,1841,9775,6583,6584,10112,375449,9429,57144,64284,55930,4174,92335,2634,55872,699,5243,4176,116987,2633,2635,5566,10212,1111,326624,3832,26278,1…	994	1463	9211	1.06411	1	0.949875	97.4578
GOTERM_MF_FAT	GO:0032553~ribonucleotide binding	168	11.8143	0.203784	157285,1195,10347,124923,9343,5230,57176,8317,164045,22974,9928,51174,11011,63893,9931,8877,10131,11325,23303,57761,4199,203,84083,56992,1184,9448,55224,1182,55226,4215,4216,80221,8395,11004,8195,134111,374654,1612,282974,10420,1915,4640,5613,8766,150465,1841,9775,6583,6584,10112,375449,9429,57144,64284,55930,4174,92335,2634,55872,699,5243,4176,116987,2633,2635,5566,10212,1111,326624,3832,26278,1…	994	1463	9211	1.06411	1	0.949875	97.4578
SP_PIR_KEYWORDS	kinase	67	4.71167	0.226479	1.57285e+288	1397	570	13223	1.11259	1	0.765779	97.8384
GOTERM_MF_FAT	GO:0032559~adenyl ribonucleotide binding	137	9.63432	0.264042	157285,1195,10347,124923,5230,57176,8317,164045,22974,9928,11011,63893,9931,8877,10131,11325,23303,57761,4199,203,84083,56992,1184,9448,55224,1182,55226,4215,4216,80221,8395,11004,8195,374654,134111,1612,282974,10420,4640,5613,150465,1841,9775,6583,6584,10112,375449,9429,57144,55930,4174,92335,55872,699,5243,4176,1111,10212,5566,3832,26278,1778,491,2180,10494,9031,617,6102,55902,55137,115,5577,85…	994	1199	9211	1.05882	1	0.969179	99.2847
GOTERM_MF_FAT	GO:0005524~ATP binding	135	9.49367	0.28225	157285,1195,10347,124923,5230,57176,8317,164045,22974,9928,11011,9931,63893,8877,10131,11325,23303,57761,203,84083,56992,1184,9448,55224,1182,55226,4215,4216,80221,8395,11004,8195,374654,134111,1612,282974,10420,4640,5613,150465,1841,9775,6583,6584,10112,375449,9429,57144,55930,4174,92335,55872,699,5243,4176,1111,10212,5566,3832,26278,1778,491,2180,10494,9031,617,6102,55902,55137,115,8573,7301,24…	994	1186	9211	1.0548	1	0.972392	99.5223
Annotation Cluster 101	Enrichment Score: 0.8240918084628366
Category	Term	Count	%	PValue	Genes	List Total	Pop Hits	Pop Total	Fold Enrichment	Bonferroni	Benjamini	FDR
GOTERM_BP_FAT	GO:0000075~cell cycle checkpoint	16	1.12518	0.0353529	8.16209e+63	1049	84	9658	1.75369	1	0.593674	48.252
GOTERM_BP_FAT	GO:0031570~DNA integrity checkpoint	9	0.632911	0.143569	8.16209e+39	1049	48	9658	1.72629	1	0.883227	94.1379
GOTERM_BP_FAT	GO:0007093~mitotic cell cycle checkpoint	8	0.562588	0.150437	1.03089e+31	1049	41	9658	1.79646	1	0.889897	94.9411
GOTERM_BP_FAT	GO:0042770~DNA damage response, signal transduction	12	0.843882	0.163644	2.81055e+52	1049	73	9658	1.51346	1	0.903339	96.2023
GOTERM_BP_FAT	GO:0000077~DNA damage checkpoint	8	0.562588	0.210938	8.90798e+34	1049	45	9658	1.63678	1	0.937608	98.6914
GOTERM_BP_FAT	GO:0031575~G1/S transition checkpoint	4	0.281294	0.217635	1.0308e+18	1049	15	9658	2.45516	1	0.940784	98.8804
GOTERM_BP_FAT	GO:0031571~G1 DNA damage checkpoint	3	0.21097	0.296984	797915151251065	1049	10	9658	2.76206	1	0.968634	99.8419
Annotation Cluster 102	Enrichment Score: 0.8231292670047653
Category	Term	Count	%	PValue	Genes	List Total	Pop Hits	Pop Total	Fold Enrichment	Bonferroni	Benjamini	FDR
GOTERM_CC_FAT	GO:0005604~basement membrane	14	0.984529	0.0116688	1.28034e+63	1000	58	8798	2.12366	0.997602	0.239841	15.6065
GOTERM_CC_FAT	GO:0005605~basal lamina	5	0.351617	0.0387695	3.91838e+20	1000	12	8798	3.66583	1	0.4921	43.5389
SP_PIR_KEYWORDS	basement membrane	8	0.562588	0.0393387	3.91834e+35	1397	31	13223	2.44265	1	0.377682	45.0766
UP_SEQ_FEATURE	domain:Laminin EGF-like 2	6	0.421941	0.0429266	3.91885e+26	1395	19	13210	2.99038	1	0.988903	55.2155
SP_PIR_KEYWORDS	laminin egf-like domain	6	0.421941	0.0749279	3.91885e+26	1397	22	13223	2.58144	1	0.525017	68.7415
UP_SEQ_FEATURE	domain:Laminin EGF-like 1	5	0.351617	0.114141	3.91885e+22	1395	18	13210	2.63043	1	0.999541	89.1282
INTERPRO	IPR018031:Laminin B	3	0.21097	0.165392	391833393911	1250	7	11754	4.02994	1	0.993108	95.3225
INTERPRO	IPR000034:Laminin B type IV	3	0.21097	0.165392	391833393911	1250	7	11754	4.02994	1	0.993108	95.3225
SMART	SM00281:LamB	3	0.21097	0.165436	391833393911	692	7	6501	4.02622	1	0.876639	91.3273
SMART	SM00180:EGF_Lam	6	0.421941	0.189036	3.91885e+26	692	29	6501	1.94369	1	0.895957	94.1154
INTERPRO	IPR002049:EGF-like, laminin	6	0.421941	0.189066	3.91885e+26	1250	29	11754	1.94549	1	0.996283	97.1271
UP_SEQ_FEATURE	domain:Laminin G-like 3	4	0.281294	0.20566	9.36938e+17	1395	15	13210	2.52521	1	0.999986	98.5235
UP_SEQ_FEATURE	domain:Laminin EGF-like 3	4	0.281294	0.23462	3.91859e+16	1395	16	13210	2.36738	1	0.999996	99.252
UP_SEQ_FEATURE	domain:Laminin EGF-like 7	3	0.21097	0.285357	391833393911	1395	10	13210	2.84086	1	0.999999	99.7869
INTERPRO	IPR001791:Laminin G	5	0.351617	0.321461	9.36938e+21	1250	27	11754	1.74133	1	0.999496	99.8597
SMART	SM00282:LamG	5	0.351617	0.321597	9.36938e+21	692	27	6501	1.73972	1	0.956843	99.4731
UP_SEQ_FEATURE	domain:Laminin EGF-like 6	3	0.21097	0.326189	391833393911	1395	11	13210	2.5826	1	1	99.9274
UP_SEQ_FEATURE	domain:Laminin G-like 2	4	0.281294	0.354655	9.36938e+17	1395	20	13210	1.89391	1	1	99.9671
UP_SEQ_FEATURE	domain:Laminin G-like 1	4	0.281294	0.354655	9.36938e+17	1395	20	13210	1.89391	1	1	99.9671
INTERPRO	IPR012680:Laminin G, subdomain 2	4	0.281294	0.558501	9.36933e+15	1250	27	11754	1.39307	1	0.999985	99.9999
Annotation Cluster 103	Enrichment Score: 0.8165738096780994
Category	Term	Count	%	PValue	Genes	List Total	Pop Hits	Pop Total	Fold Enrichment	Bonferroni	Benjamini	FDR
INTERPRO	IPR011042:Six-bladed beta-propeller, TolB-like	7	0.492264	0.104375	5.06654e+30	1250	31	11754	2.1233	1	0.979444	84.5446
UP_SEQ_FEATURE	repeat:NHL 5	3	0.21097	0.125269	50665745123321	1395	6	13210	4.73477	1	0.999681	91.3744
UP_SEQ_FEATURE	repeat:NHL 2	3	0.21097	0.163527	50665745123321	1395	7	13210	4.05837	1	0.999949	96.1965
UP_SEQ_FEATURE	repeat:NHL 1	3	0.21097	0.163527	50665745123321	1395	7	13210	4.05837	1	0.999949	96.1965
UP_SEQ_FEATURE	repeat:NHL 4	3	0.21097	0.163527	50665745123321	1395	7	13210	4.05837	1	0.999949	96.1965
UP_SEQ_FEATURE	repeat:NHL 3	3	0.21097	0.163527	50665745123321	1395	7	13210	4.05837	1	0.999949	96.1965
INTERPRO	IPR001258:NHL repeat	3	0.21097	0.20568	50665745123321	1250	8	11754	3.5262	1	0.997206	97.9768
Annotation Cluster 104	Enrichment Score: 0.8079670894442224
Category	Term	Count	%	PValue	Genes	List Total	Pop Hits	Pop Total	Fold Enrichment	Bonferroni	Benjamini	FDR
GOTERM_CC_FAT	GO:0016323~basolateral plasma membrane	26	1.82841	0.0897966	6.55847e+105	1000	167	8798	1.36975	1	0.701511	74.3379
GOTERM_CC_FAT	GO:0070161~anchoring junction	22	1.54712	0.0990009	3.67392e+90	1000	138	8798	1.40258	1	0.696016	77.8446
GOTERM_CC_FAT	GO:0005912~adherens junction	20	1.40647	0.126893	3.67392e+82	1000	127	8798	1.38551	1	0.759116	85.9379
GOTERM_CC_FAT	GO:0005924~cell-substrate adherens junction	14	0.984529	0.194865	3.67392e+57	1000	88	8798	1.39968	1	0.829389	95.6428
GOTERM_CC_FAT	GO:0030055~cell-substrate junction	14	0.984529	0.253951	3.67392e+57	1000	93	8798	1.32443	1	0.869308	98.5523
GOTERM_CC_FAT	GO:0005925~focal adhesion	13	0.914205	0.254316	3.67352e+52	1000	85	8798	1.34558	1	0.866163	98.5625
Annotation Cluster 105	Enrichment Score: 0.7979637957168747
Category	Term	Count	%	PValue	Genes	List Total	Pop Hits	Pop Total	Fold Enrichment	Bonferroni	Benjamini	FDR
GOTERM_MF_FAT	GO:0051015~actin filament binding	10	0.703235	0.0421779	5.35768e+43	994	44	9211	2.10605	1	0.762909	50.0628
GOTERM_CC_FAT	GO:0015629~actin cytoskeleton	31	2.18003	0.0741831	1.12588e+133	1000	202	8798	1.35019	1	0.64746	67.1847
SP_PIR_KEYWORDS	actin-binding	26	1.82841	0.128505	8.22509e+111	1397	187	13223	1.31603	1	0.629676	87.1737
GOTERM_MF_FAT	GO:0003779~actin binding	29	2.03938	0.409511	8.22509e+124	994	246	9211	1.0924	1	0.991553	99.9794
GOTERM_MF_FAT	GO:0008092~cytoskeletal protein binding	42	2.95359	0.621738	8.24587e+184	994	394	9211	0.98781	1	0.998799	100
Annotation Cluster 106	Enrichment Score: 0.7965564874289581
Category	Term	Count	%	PValue	Genes	List Total	Pop Hits	Pop Total	Fold Enrichment	Bonferroni	Benjamini	FDR
SP_PIR_KEYWORDS	chemotaxis	10	0.703235	0.0286555	5.1681e+43	1397	42	13223	2.25364	1	0.331079	35.2156
GOTERM_BP_FAT	GO:0006935~chemotaxis	15	1.05485	0.163489	5.1681e+64	1049	97	9658	1.42374	1	0.903954	96.1895
GOTERM_BP_FAT	GO:0042330~taxis	15	1.05485	0.163489	5.1681e+64	1049	97	9658	1.42374	1	0.903954	96.1895
GOTERM_BP_FAT	GO:0007626~locomotory behavior	23	1.61744	0.187848	5.1681e+98	1049	166	9658	1.27565	1	0.921067	97.7814
GOTERM_BP_FAT	GO:0007610~behavior	37	2.60197	0.236158	5.1681e+157	1049	293	9658	1.16264	1	0.951317	99.2779
GOTERM_MF_FAT	GO:0008009~chemokine activity	5	0.351617	0.255561	1.03446e+21	994	24	9211	1.93054	1	0.967151	99.1397
GOTERM_MF_FAT	GO:0042379~chemokine receptor binding	5	0.351617	0.305785	1.03446e+21	994	26	9211	1.78204	1	0.979322	99.7209
Annotation Cluster 107	Enrichment Score: 0.7953453863064491
Category	Term	Count	%	PValue	Genes	List Total	Pop Hits	Pop Total	Fold Enrichment	Bonferroni	Benjamini	FDR
GOTERM_MF_FAT	GO:0008238~exopeptidase activity	13	0.914205	0.01672	5.92721e+56	994	57	9211	2.11343	1	0.608832	23.7921
GOTERM_MF_FAT	GO:0008237~metallopeptidase activity	18	1.26582	0.130938	64172,206338,4224,95,59272,1361,2346,60509,290,51056,8754,79875,51321,57094,7511,57393,1358,4323	994	118	9211	1.41355	1	0.916736	89.5801
UP_SEQ_FEATURE	metal ion-binding site:Zinc; catalytic	12	0.843882	0.232012	7.63206e+51	1395	81	13210	1.40289	1	0.999996	99.2039
SP_PIR_KEYWORDS	metalloprotease	13	0.914205	0.29965	2.06339e+56	1397	95	13223	1.29525	1	0.82231	99.5098
INTERPRO	IPR006025:Peptidase M, neutral zinc metallopeptidases, zinc-binding site	6	0.421941	0.693179	5.13214e+24	1250	54	11754	1.0448	1	0.999998	100
Annotation Cluster 108	Enrichment Score: 0.7909796716905293
Category	Term	Count	%	PValue	Genes	List Total	Pop Hits	Pop Total	Fold Enrichment	Bonferroni	Benjamini	FDR
UP_SEQ_FEATURE	propeptide:Activation peptide	10	0.703235	0.0152883	1.51257e+40	1395	38	13210	2.49198	1	0.957618	24.5782
PIR_SUPERFAMILY	PIRSF001182:papain	4	0.281294	0.056581	1.51215e+15	589	8	5036	4.27504	1	0.997771	57.9279
SMART	SM00645:Pept_C1	4	0.281294	0.0812869	1.51215e+15	692	10	6501	3.7578	1	0.76443	68.2166
INTERPRO	IPR013128:Peptidase C1A, papain	4	0.281294	0.0812986	1.51215e+15	1250	10	11754	3.76128	1	0.971485	76.2196
INTERPRO	IPR000668:Peptidase C1A, papain C-terminal	4	0.281294	0.0812986	1.51215e+15	1250	10	11754	3.76128	1	0.971485	76.2196
SP_PIR_KEYWORDS	cysteine proteinase	4	0.281294	0.125425	82415121520837	1397	12	13223	3.15509	1	0.624229	86.4801
INTERPRO	IPR013201:Proteinase inhibitor I29, cathepsin propeptide	3	0.21097	0.126758	151215201515	1250	6	11754	4.7016	1	0.986993	89.9332
INTERPRO	IPR000169:Peptidase, cysteine peptidase active site	6	0.421941	0.135295	8.24151e+23	1250	26	11754	2.16997	1	0.98882	91.4765
GOTERM_MF_FAT	GO:0004197~cysteine-type endopeptidase activity	7	0.492264	0.551989	8.24151e+24	994	55	9211	1.17939	1	0.997834	99.9998
KEGG_PATHWAY	hsa04142:Lysosome	12	0.843882	0.7674	2.51715e+46	436	108	3618	0.922018	1	0.978198	100
SP_PIR_KEYWORDS	thiol protease	9	0.632911	0.833615	8.24151e+34	1397	99	13223	0.86048	1	0.992228	100
GOTERM_MF_FAT	GO:0008234~cysteine-type peptidase activity	9	0.632911	0.912996	8.24151e+34	994	109	9211	0.765132	1	0.999997	100
Annotation Cluster 109	Enrichment Score: 0.7881436832919823
Category	Term	Count	%	PValue	Genes	List Total	Pop Hits	Pop Total	Fold Enrichment	Bonferroni	Benjamini	FDR
SP_PIR_KEYWORDS	fmn	4	0.281294	0.125425	1.80651e+17	1397	12	13223	3.15509	1	0.624229	86.4801
GOTERM_MF_FAT	GO:0010181~FMN binding	3	0.21097	0.169323	51179551634552	994	7	9211	3.9714	1	0.942358	94.9682
UP_SEQ_FEATURE	nucleotide phosphate-binding region:FMN	3	0.21097	0.203455	51179551634552	1395	8	13210	3.55108	1	0.999986	98.4467
Annotation Cluster 110	Enrichment Score: 0.7857729241361819
Category	Term	Count	%	PValue	Genes	List Total	Pop Hits	Pop Total	Fold Enrichment	Bonferroni	Benjamini	FDR
GOTERM_MF_FAT	GO:0004022~alcohol dehydrogenase (NAD) activity	4	0.281294	0.0313405	12812413022949	994	7	9211	5.2952	1	0.687526	40.1366
INTERPRO	IPR002328:Alcohol dehydrogenase, zinc-containing, conserved site	3	0.21097	0.0907395	128124130	1250	5	11754	5.64192	1	0.971735	80.0368
GOTERM_BP_FAT	GO:0034308~monohydric alcohol metabolic process	3	0.21097	0.0941673	128124130	1049	5	9658	5.52412	1	0.808666	83.6378
GOTERM_BP_FAT	GO:0006069~ethanol oxidation	3	0.21097	0.0941673	128124130	1049	5	9658	5.52412	1	0.808666	83.6378
GOTERM_BP_FAT	GO:0006067~ethanol metabolic process	3	0.21097	0.0941673	128124130	1049	5	9658	5.52412	1	0.808666	83.6378
KEGG_PATHWAY	hsa00980:Metabolism of xenobiotics by cytochrome P450	9	0.632911	0.0992937	2.93813e+32	436	40	3618	1.86709	1	0.741283	72.4538
UP_SEQ_FEATURE	metal ion-binding site:Zinc 1; catalytic	3	0.21097	0.163527	128124130	1395	7	13210	4.05837	1	0.999949	96.1965
SP_PIR_KEYWORDS	alcohol metabolism	3	0.21097	0.163647	128124130	1397	7	13223	4.05655	1	0.69066	93.0625
INTERPRO	IPR013149:Alcohol dehydrogenase, zinc-binding	4	0.281294	0.237847	12812413022949	1250	16	11754	2.3508	1	0.998446	98.9955
INTERPRO	IPR002085:Alcohol dehydrogenase superfamily, zinc-containing	4	0.281294	0.237847	12812413022949	1250	16	11754	2.3508	1	0.998446	98.9955
PIR_SUPERFAMILY	PIRSF000091:alcohol dehydrogenase	3	0.21097	0.237893	128124130	589	8	5036	3.20628	1	1	98.2372
KEGG_PATHWAY	hsa00071:Fatty acid metabolism	7	0.492264	0.303174	2180,128,224,30,124,51,130	436	38	3618	1.52861	1	0.919108	98.8361
KEGG_PATHWAY	hsa00010:Glycolysis / Gluconeogenesis	8	0.562588	0.374609	5.59021e+28	436	49	3618	1.3548	1	0.935466	99.6933
INTERPRO	IPR013154:Alcohol dehydrogenase GroES-like	3	0.21097	0.409131	128124130	1250	13	11754	2.16997	1	0.999854	99.9865
KEGG_PATHWAY	hsa00350:Tyrosine metabolism	6	0.421941	0.414262	1.28316e+19	436	35	3618	1.42254	1	0.932069	99.8632
Annotation Cluster 111	Enrichment Score: 0.7766360516637107
Category	Term	Count	%	PValue	Genes	List Total	Pop Hits	Pop Total	Fold Enrichment	Bonferroni	Benjamini	FDR
GOTERM_BP_FAT	GO:0045730~respiratory burst	4	0.281294	0.0198022	2.70355e+16	1049	6	9658	6.13791	1	0.474866	30.6552
GOTERM_MF_FAT	GO:0016175~superoxide-generating NADPH oxidase activity	3	0.21097	0.0600766	2703546881535	994	4	9211	6.94995	1	0.829074	63.1522
GOTERM_CC_FAT	GO:0043020~NADPH oxidase complex	3	0.21097	0.0661061	2703546881535	1000	4	8798	6.5985	1	0.62337	62.7941
GOTERM_MF_FAT	GO:0050664~oxidoreductase activity, acting on NADH or NADPH, with oxygen as acceptor	3	0.21097	0.25222	2703546881535	994	9	9211	3.08887	1	0.966548	99.0753
GOTERM_BP_FAT	GO:0042554~superoxide anion generation	3	0.21097	0.296984	2703546881535	1049	10	9658	2.76206	1	0.968634	99.8419
GOTERM_BP_FAT	GO:0006801~superoxide metabolic process	3	0.21097	0.65501	2703546881535	1049	20	9658	1.38103	1	0.998653	100
GOTERM_MF_FAT	GO:0016651~oxidoreductase activity, acting on NADH or NADPH	5	0.351617	0.948696	2.70355e+21	994	69	9211	0.671493	1	1	100
Annotation Cluster 112	Enrichment Score: 0.7672644836709488
Category	Term	Count	%	PValue	Genes	List Total	Pop Hits	Pop Total	Fold Enrichment	Bonferroni	Benjamini	FDR
GOTERM_BP_FAT	GO:0002673~regulation of acute inflammatory response	5	0.351617	0.0869701	271821617105468	1049	16	9658	2.87714	1	0.791244	81.0874
GOTERM_BP_FAT	GO:0010953~regulation of protein maturation by peptide bond cleavage	3	0.21097	0.13135	22161710	1049	6	9658	4.60343	1	0.867845	92.4025
GOTERM_BP_FAT	GO:0070613~regulation of protein processing	3	0.21097	0.13135	22161710	1049	6	9658	4.60343	1	0.867845	92.4025
GOTERM_BP_FAT	GO:0030162~regulation of proteolysis	6	0.421941	0.568477	2.51042e+19	1049	46	9658	1.2009	1	0.996457	100
Annotation Cluster 113	Enrichment Score: 0.7662646284190409
Category	Term	Count	%	PValue	Genes	List Total	Pop Hits	Pop Total	Fold Enrichment	Bonferroni	Benjamini	FDR
UP_SEQ_FEATURE	domain:IQ 3	6	0.421941	0.0272479	5.59309e+28	1395	17	13210	3.34219	1	0.978813	39.6979
UP_SEQ_FEATURE	domain:IQ 2	7	0.492264	0.0496894	5.59309e+32	1395	26	13210	2.54949	1	0.990704	60.6683
UP_SEQ_FEATURE	domain:IQ 1	7	0.492264	0.0496894	5.59309e+32	1395	26	13210	2.54949	1	0.990704	60.6683
UP_SEQ_FEATURE	domain:IQ 4	4	0.281294	0.101612	5.59309e+18	1395	11	13210	3.44347	1	0.999244	85.9404
SP_PIR_KEYWORDS	myosin	7	0.492264	0.128567	5.59301e+31	1397	33	13223	2.00779	1	0.625803	87.1874
UP_SEQ_FEATURE	domain:IQ 5	3	0.21097	0.163527	559304649259266	1395	7	13210	4.05837	1	0.999949	96.1965
GOTERM_CC_FAT	GO:0016459~myosin complex	8	0.562588	0.193687	5.59301e+36	1000	42	8798	1.67581	1	0.832165	95.5498
SP_PIR_KEYWORDS	calmodulin-binding	14	0.984529	0.210258	5.59301e+60	1397	96	13223	1.38035	1	0.745874	97.0531
SMART	SM00015:IQ	9	0.632911	0.255749	5.59309e+41	692	57	6501	1.48334	1	0.929939	98.1564
INTERPRO	IPR000048:IQ calmodulin-binding region	9	0.632911	0.255805	5.59309e+41	1250	57	11754	1.48472	1	0.998626	99.3293
INTERPRO	IPR001609:Myosin head, motor region	5	0.351617	0.271627	5.59305e+20	1250	25	11754	1.88064	1	0.998898	99.5339
SMART	SM00242:MYSc	5	0.351617	0.271708	5.59305e+20	692	25	6501	1.8789	1	0.933016	98.6247
GOTERM_MF_FAT	GO:0005516~calmodulin binding	14	0.984529	0.393511	5.59301e+60	994	109	9211	1.19021	1	0.990338	99.9683
UP_SEQ_FEATURE	domain:Myosin head-like	4	0.281294	0.47217	5.59305e+16	1395	24	13210	1.57826	1	1	99.9992
UP_SEQ_FEATURE	region of interest:Actin-binding	3	0.21097	0.610659	464646494640	1395	19	13210	1.49519	1	1	100
Annotation Cluster 114	Enrichment Score: 0.7559815880286141
Category	Term	Count	%	PValue	Genes	List Total	Pop Hits	Pop Total	Fold Enrichment	Bonferroni	Benjamini	FDR
SMART	SM00209:TSP1	9	0.632911	0.0320923	7.2922e+40	692	36	6501	2.34863	0.999974	0.529936	35.6604
INTERPRO	IPR000884:Thrombospondin, type 1 repeat	9	0.632911	0.0322252	7.2922e+40	1250	36	11754	2.3508	1	0.882065	42.5839
UP_SEQ_FEATURE	domain:TSP type-1 1	6	0.421941	0.11651	7.2922e+27	1395	25	13210	2.27269	1	0.999554	89.6483
UP_SEQ_FEATURE	domain:TSP type-1 2	6	0.421941	0.11651	7.2922e+27	1395	25	13210	2.27269	1	0.999554	89.6483
UP_SEQ_FEATURE	glycosylation site:C-linked (Man)	3	0.21097	0.244276	72910417732	1395	9	13210	3.15651	1	0.999996	99.4071
UP_SEQ_FEATURE	domain:TSP type-1 6	3	0.21097	0.285357	8.07312e+15	1395	10	13210	2.84086	1	0.999999	99.7869
UP_SEQ_FEATURE	domain:TSP type-1	3	0.21097	0.326189	3491149010417	1395	11	13210	2.5826	1	1	99.9274
UP_SEQ_FEATURE	domain:TSP type-1 3	4	0.281294	0.354655	7.29807e+18	1395	20	13210	1.89391	1	1	99.9671
UP_SEQ_FEATURE	domain:TSP type-1 5	3	0.21097	0.443571	8.07312e+15	1395	14	13210	2.02919	1	1	99.9978
UP_SEQ_FEATURE	domain:TSP type-1 4	3	0.21097	0.548722	8.07312e+15	1395	17	13210	1.67109	1	1	100
Annotation Cluster 115	Enrichment Score: 0.7437959352912271
Category	Term	Count	%	PValue	Genes	List Total	Pop Hits	Pop Total	Fold Enrichment	Bonferroni	Benjamini	FDR
GOTERM_MF_FAT	GO:0042153~RPTP-like protein binding	3	0.21097	0.0600766	37281000999	994	4	9211	6.94995	1	0.829074	63.1522
GOTERM_MF_FAT	GO:0019903~protein phosphatase binding	7	0.492264	0.12368	8.72488e+26	994	32	9211	2.02707	1	0.917032	88.0859
GOTERM_MF_FAT	GO:0019902~phosphatase binding	7	0.492264	0.203349	8.72488e+26	994	37	9211	1.75314	1	0.951198	97.4353
GOTERM_BP_FAT	GO:0051291~protein heterooligomerization	5	0.351617	0.700759	3.71056e+20	1049	43	9658	1.07057	1	0.999288	100
Annotation Cluster 116	Enrichment Score: 0.7356663948415171
Category	Term	Count	%	PValue	Genes	List Total	Pop Hits	Pop Total	Fold Enrichment	Bonferroni	Benjamini	FDR
UP_SEQ_FEATURE	domain:LIM zinc-binding	6	0.421941	0.0157924	5.75536e+27	1395	15	13210	3.78781	1	0.937724	25.282
SMART	SM00033:CH	10	0.703235	0.195134	5.75535e+45	692	61	6501	1.54008	1	0.896567	94.6862
INTERPRO	IPR001715:Calponin-like actin-binding	10	0.703235	0.195331	5.75535e+45	1250	61	11754	1.54151	1	0.996705	97.4808
UP_SEQ_FEATURE	domain:CH	6	0.421941	0.372997	5.75536e+26	1395	38	13210	1.49519	1	1	99.9806
UP_SEQ_FEATURE	domain:CH 2	4	0.281294	0.414354	5.35739e+18	1395	22	13210	1.72173	1	1	99.9944
UP_SEQ_FEATURE	domain:CH 1	4	0.281294	0.414354	5.35739e+18	1395	22	13210	1.72173	1	1	99.9944
Annotation Cluster 117	Enrichment Score: 0.7250461072800736
Category	Term	Count	%	PValue	Genes	List Total	Pop Hits	Pop Total	Fold Enrichment	Bonferroni	Benjamini	FDR
GOTERM_BP_FAT	GO:0007017~microtubule-based process	32	2.25035	0.0570743	1.04601e+144	1049	214	9658	1.37673	1	0.703774	65.8919
SP_PIR_KEYWORDS	microtubule	24	1.68776	0.232527	2.21151e+114	1397	185	13223	1.22793	1	0.77014	98.0774
GOTERM_BP_FAT	GO:0007018~microtubule-based movement	13	0.914205	0.268029	5.69924e+60	1049	90	9658	1.32988	1	0.961941	99.669
GOTERM_CC_FAT	GO:0005874~microtubule	28	1.96906	0.35377	3.80078e+128	1000	219	8798	1.12486	1	0.926425	99.8185
Annotation Cluster 118	Enrichment Score: 0.721814882361846
Category	Term	Count	%	PValue	Genes	List Total	Pop Hits	Pop Total	Fold Enrichment	Bonferroni	Benjamini	FDR
SP_PIR_KEYWORDS	catecholamine metabolism	3	0.21097	0.125365	679968171312	1397	6	13223	4.73264	1	0.628198	86.4663
GOTERM_BP_FAT	GO:0034311~diol metabolic process	5	0.351617	0.16485	7.04268e+19	1049	20	9658	2.30172	1	0.903464	96.3014
GOTERM_BP_FAT	GO:0009712~catechol metabolic process	5	0.351617	0.16485	7.04268e+19	1049	20	9658	2.30172	1	0.903464	96.3014
GOTERM_BP_FAT	GO:0006584~catecholamine metabolic process	5	0.351617	0.16485	7.04268e+19	1049	20	9658	2.30172	1	0.903464	96.3014
GOTERM_BP_FAT	GO:0018958~phenol metabolic process	5	0.351617	0.187282	7.04268e+19	1049	21	9658	2.19211	1	0.921099	97.7529
GOTERM_BP_FAT	GO:0006576~biogenic amine metabolic process	9	0.632911	0.443783	4.91704e+35	1049	67	9658	1.23674	1	0.989793	99.9978
Annotation Cluster 119	Enrichment Score: 0.7099506974352193
Category	Term	Count	%	PValue	Genes	List Total	Pop Hits	Pop Total	Fold Enrichment	Bonferroni	Benjamini	FDR
SP_PIR_KEYWORDS	cytoskeleton	72	5.06329	0.0109983	11258,55785,332,55742,22974,24137,3728,79902,9928,288,51174,7168,3927,25897,23406,10300,701,9654,65059,9590,23303,56992,23022,64780,91624,167691,7408,6840,5493,57326,9212,8727,11004,27229,10095,7171,85477,115677,10579,9645,9055,51474,57553,81610,2934,4739,10979,22994,57223,283638,6790,348235,23157,3696,3655,55143,7111,221150,55075,54874,55200,1111,1063,26586,3936,994,1832,2036,891,4957,79778,4281	1397	515	13223	1.3233	0.999245	0.185667	15.2213
GOTERM_CC_FAT	GO:0005856~cytoskeleton	125	8.79044	0.11982	10205,332,55742,22974,3728,9928,79902,288,51174,7168,3927,65059,9654,9656,23303,56992,167691,7408,57669,8727,11004,10095,6877,9050,85477,7171,115677,9645,1612,9055,57553,822,81610,22994,4640,57223,348235,51512,10112,84722,7111,55930,55075,699,55200,54874,1111,3832,6819,1063,1778,996,3936,1832,994,255520,991,396,397,891,4957,79778,898,85358,999,11258,55785,11259,50853,7846,8573,24137,10398,4000,10…	1000	989	8798	1.11198	1	0.759759	84.1981
GOTERM_CC_FAT	GO:0044430~cytoskeletal part	83	5.83685	0.235349	11258,11259,7846,332,22974,24137,10398,79902,4000,9928,51174,7168,10381,25897,3927,10300,701,9654,259266,23303,64780,56992,23022,5881,167691,6840,9212,57326,11004,27229,8826,10095,4751,4646,7171,4649,10579,4642,9055,51474,81610,822,3800,4739,10979,22994,4640,57223,283638,6790,348235,23157,6907,103910,51512,6904,10112,84722,55143,221150,55930,10253,699,55200,1111,3832,7153,26509,1063,1778,26586,99…	1000	668	8798	1.09316	1	0.864516	97.9331
GOTERM_CC_FAT	GO:0015630~microtubule cytoskeleton	59	4.14909	0.238371	1.12588e+263	1000	465	8798	1.11631	1	0.856854	98.0482
GOTERM_CC_FAT	GO:0043232~intracellular non-membrane-bounded organelle	217	15.2602	0.862457	10205,6774,332,55742,51081,3728,79902,55646,51174,55379,7168,3927,146956,65059,57761,55226,3710,167691,4603,51096,8727,81691,10095,6877,7171,85477,115677,2842,822,64073,23397,3843,4640,57223,9191,10083,348235,6749,55930,54874,55200,3832,1063,3936,1832,1058,57602,85358,55785,55902,50853,64151,7846,92856,8842,10381,25897,84172,701,9590,23022,301,11232,5705,51264,6198,9212,6199,64978,65003,8826,4751…	1000	2018	8798	0.946068	1	0.99836	100
GOTERM_CC_FAT	GO:0043228~non-membrane-bounded organelle	217	15.2602	0.862457	10205,6774,332,55742,51081,3728,79902,55646,51174,55379,7168,3927,146956,65059,57761,55226,3710,167691,4603,51096,8727,81691,10095,6877,7171,85477,115677,2842,822,64073,23397,3843,4640,57223,9191,10083,348235,6749,55930,54874,55200,3832,1063,3936,1832,1058,57602,85358,55785,55902,50853,64151,7846,92856,8842,10381,25897,84172,701,9590,23022,301,11232,5705,51264,6198,9212,6199,64978,65003,8826,4751…	1000	2018	8798	0.946068	1	0.99836	100
Annotation Cluster 120	Enrichment Score: 0.6957378014826622
Category	Term	Count	%	PValue	Genes	List Total	Pop Hits	Pop Total	Fold Enrichment	Bonferroni	Benjamini	FDR
GOTERM_BP_FAT	GO:0001558~regulation of cell growth	26	1.82841	0.0274632	1.60128e+105	1049	155	9658	1.54438	1	0.544985	39.9321
GOTERM_BP_FAT	GO:0032535~regulation of cellular component size	28	1.96906	0.260054	1.60182e+117	1049	218	9658	1.18253	1	0.959374	99.5964
GOTERM_BP_FAT	GO:0045792~negative regulation of cell size	12	0.843882	0.273588	1.6017e+47	1049	82	9658	1.34735	1	0.963434	99.7121
GOTERM_BP_FAT	GO:0008361~regulation of cell size	22	1.54712	0.277824	1.60185e+90	1049	168	9658	1.20566	1	0.964889	99.7413
GOTERM_BP_FAT	GO:0030308~negative regulation of cell growth	11	0.773558	0.30816	1.6017e+42	1049	76	9658	1.33257	1	0.971255	99.8821
GOTERM_BP_FAT	GO:0045926~negative regulation of growth	12	0.843882	0.40005	1.6017e+47	1049	91	9658	1.21409	1	0.985751	99.9913
Annotation Cluster 121	Enrichment Score: 0.6946259795897661
Category	Term	Count	%	PValue	Genes	List Total	Pop Hits	Pop Total	Fold Enrichment	Bonferroni	Benjamini	FDR
SP_PIR_KEYWORDS	mitogen	6	0.421941	0.101723	7.04252e+22	1397	24	13223	2.36632	1	0.568341	79.8456
GOTERM_BP_FAT	GO:0051781~positive regulation of cell division	5	0.351617	0.284589	7.04252e+18	1049	25	9658	1.84137	1	0.965822	99.7823
GOTERM_BP_FAT	GO:0051302~regulation of cell division	6	0.421941	0.284764	7.04252e+24	1049	33	9658	1.67398	1	0.965571	99.7832
Annotation Cluster 122	Enrichment Score: 0.6895402205653858
Category	Term	Count	%	PValue	Genes	List Total	Pop Hits	Pop Total	Fold Enrichment	Bonferroni	Benjamini	FDR
SP_PIR_KEYWORDS	lysosome	19	1.33615	0.119775	5.87322e+81	1397	127	13223	1.41607	1	0.614482	85.1156
GOTERM_CC_FAT	GO:0005764~lysosome	25	1.75809	0.181526	5.87399e+106	1000	174	8798	1.26408	1	0.830549	94.4745
GOTERM_CC_FAT	GO:0000323~lytic vacuole	25	1.75809	0.181526	5.87399e+106	1000	174	8798	1.26408	1	0.830549	94.4745
GOTERM_CC_FAT	GO:0005773~vacuole	26	1.82841	0.442178	5.87399e+110	1000	211	8798	1.08411	1	0.958902	99.9784
Annotation Cluster 123	Enrichment Score: 0.6748473957957895
Category	Term	Count	%	PValue	Genes	List Total	Pop Hits	Pop Total	Fold Enrichment	Bonferroni	Benjamini	FDR
GOTERM_BP_FAT	GO:0035295~tube development	29	2.03938	0.0276665	3.08752e+116	1049	178	9658	1.49999	1	0.544763	40.1615
GOTERM_BP_FAT	GO:0030323~respiratory tube development	12	0.843882	0.260301	5.1541e+47	1049	81	9658	1.36398	1	0.959121	99.5989
GOTERM_BP_FAT	GO:0030324~lung development	10	0.703235	0.475762	5.1541e+38	1049	78	9658	1.18037	1	0.992344	99.9993
GOTERM_BP_FAT	GO:0060541~respiratory system development	10	0.703235	0.583164	5.1541e+38	1049	85	9658	1.08316	1	0.996896	100
Annotation Cluster 124	Enrichment Score: 0.6701651313247956
Category	Term	Count	%	PValue	Genes	List Total	Pop Hits	Pop Total	Fold Enrichment	Bonferroni	Benjamini	FDR
UP_SEQ_FEATURE	nucleotide phosphate-binding region:NAD	11	0.773558	0.153726	8.65933e+43	1395	66	13210	1.57826	1	0.999916	95.2924
GOTERM_MF_FAT	GO:0016620~oxidoreductase activity, acting on the aldehyde or oxo group of donors, NAD or NADP as acceptor	5	0.351617	0.18422	8.65913e+18	994	21	9211	2.20633	1	0.948965	96.2408
INTERPRO	IPR015590:Aldehyde dehydrogenase	4	0.281294	0.237847	8.65922e+15	1250	16	11754	2.3508	1	0.998446	98.9955
INTERPRO	IPR016160:Aldehyde dehydrogenase, conserved site	5	0.351617	0.247224	2.36009e+20	1250	24	11754	1.959	1	0.998363	99.1855
INTERPRO	IPR016162:Aldehyde dehydrogenase, N-terminal	4	0.281294	0.267734	8.65922e+15	1250	17	11754	2.21252	1	0.998954	99.4899
Annotation Cluster 125	Enrichment Score: 0.66702503675724
Category	Term	Count	%	PValue	Genes	List Total	Pop Hits	Pop Total	Fold Enrichment	Bonferroni	Benjamini	FDR
GOTERM_BP_FAT	GO:0001501~skeletal system development	35	2.46132	0.0785035	3.21941e+141	1049	245	9658	1.31527	1	0.767345	77.6065
GOTERM_BP_FAT	GO:0001503~ossification	13	0.914205	0.243151	1.28033e+49	1049	88	9658	1.3601	1	0.953405	99.3898
GOTERM_BP_FAT	GO:0060348~bone development	13	0.914205	0.320039	1.28033e+49	1049	94	9658	1.27329	1	0.974662	99.9141
GOTERM_BP_FAT	GO:0001649~osteoblast differentiation	6	0.421941	0.351505	4.09065e+22	1049	36	9658	1.53448	1	0.978773	99.9639
Annotation Cluster 126	Enrichment Score: 0.6635052217787675
Category	Term	Count	%	PValue	Genes	List Total	Pop Hits	Pop Total	Fold Enrichment	Bonferroni	Benjamini	FDR
GOTERM_BP_FAT	GO:0018108~peptidyl-tyrosine phosphorylation	8	0.562588	0.111328	1.19521e+30	1049	38	9658	1.93829	1	0.836078	88.4706
GOTERM_BP_FAT	GO:0018212~peptidyl-tyrosine modification	8	0.562588	0.136751	1.19521e+30	1049	40	9658	1.84137	1	0.876008	93.2222
SP_PIR_KEYWORDS	tyrosine-specific protein kinase	4	0.281294	0.671349	364322647802242	1397	32	13223	1.18316	1	0.969112	100
Annotation Cluster 127	Enrichment Score: 0.6618667402466961
Category	Term	Count	%	PValue	Genes	List Total	Pop Hits	Pop Total	Fold Enrichment	Bonferroni	Benjamini	FDR
INTERPRO	IPR016054:Ly-6 antigen / uPA receptor -like	3	0.21097	0.20568	966130576130574	1250	8	11754	3.5262	1	0.997206	97.9768
SMART	SM00134:LU	3	0.21097	0.205744	966130576130574	692	8	6501	3.52294	1	0.895817	95.5589
UP_SEQ_FEATURE	domain:UPAR/Ly6	3	0.21097	0.244276	966130576130574	1395	9	13210	3.15651	1	0.999996	99.4071
Annotation Cluster 128	Enrichment Score: 0.6579077192041936
Category	Term	Count	%	PValue	Genes	List Total	Pop Hits	Pop Total	Fold Enrichment	Bonferroni	Benjamini	FDR
GOTERM_BP_FAT	GO:0015718~monocarboxylic acid transport	8	0.562588	0.123706	9.12352e+29	1049	39	9658	1.88859	1	0.857172	91.0811
GOTERM_BP_FAT	GO:0015908~fatty acid transport	5	0.351617	0.187282	6.5783e+17	1049	21	9658	2.19211	1	0.921099	97.7529
GOTERM_BP_FAT	GO:0015909~long-chain fatty acid transport	3	0.21097	0.458554	3017885468	1049	14	9658	1.9729	1	0.991277	99.9987
Annotation Cluster 129	Enrichment Score: 0.6472047573194943
Category	Term	Count	%	PValue	Genes	List Total	Pop Hits	Pop Total	Fold Enrichment	Bonferroni	Benjamini	FDR
UP_SEQ_FEATURE	nucleotide phosphate-binding region:ATP	97	6.82138	0.0542425	157285,1195,124923,5230,8317,164045,9928,11011,9931,11325,23303,84083,203,56992,1184,9448,1182,4215,55226,4216,80221,11004,8195,374654,1612,282974,10420,4640,5613,1841,9775,6583,6584,10112,9429,375449,57144,4174,55872,4176,699,1111,10212,5566,3832,1778,10494,617,55137,8573,24137,7301,343450,55601,5587,701,5889,780,5603,5705,9060,5608,2264,9401,7444,445,9212,6198,6199,4751,4646,3643,4649,55510,165…	1395	777	13210	1.18217	1	0.992273	63.9792
UP_SEQ_FEATURE	active site:Proton acceptor	68	4.782	0.0625043	157285,1195,124923,7498,8317,3283,7301,283,6822,51179,11011,51635,5587,701,780,4199,5446,3291,6783,9448,4215,5603,4216,64577,5608,2264,7444,157506,6198,9212,6199,30,4751,3248,3643,23604,1612,6195,282974,84451,10873,10420,5613,6790,8798,6787,51347,3945,10461,375449,57144,95,55872,699,81788,5566,1111,6819,6817,51181,2242,8659,5959,55825,10494,6799,51,2869	1395	528	13210	1.21956	1	0.9953	69.3247
SMART	SM00220:S_TKc	29	2.03938	0.136858	2.82974e+125	692	213	6501	1.27906	1	0.862878	86.3276
INTERPRO	IPR002290:Serine/threonine protein kinase	29	2.03938	0.138259	2.82974e+125	1250	213	11754	1.28025	1	0.988249	91.9581
UP_SEQ_FEATURE	binding site:ATP	53	3.72714	0.176838	1.57285e+231	1395	433	13210	1.15909	1	0.999971	97.1645
GOTERM_MF_FAT	GO:0004672~protein kinase activity	60	4.21941	0.187809	1.57285e+261	994	489	9211	1.13701	1	0.946593	96.4987
UP_SEQ_FEATURE	domain:Protein kinase	46	3.23488	0.198552	1.57285e+200	1395	375	13210	1.1616	1	0.999984	98.262
SP_PIR_KEYWORDS	kinase	67	4.71167	0.226479	1.57285e+288	1397	570	13223	1.11259	1	0.765779	97.8384
INTERPRO	IPR017441:Protein kinase, ATP binding site	44	3.09423	0.226677	1.57285e+189	1250	360	11754	1.14928	1	0.998304	98.7148
INTERPRO	IPR000719:Protein kinase, core	46	3.23488	0.238754	1.57285e+201	1250	380	11754	1.13828	1	0.998353	99.0156
INTERPRO	IPR008271:Serine/threonine protein kinase, active site	36	2.53165	0.241394	2.82974e+155	1250	291	11754	1.16328	1	0.998347	99.0718
INTERPRO	IPR017442:Serine/threonine protein kinase-related	36	2.53165	0.27504	1.19528e+160	1250	296	11754	1.14363	1	0.998917	99.5696
SP_PIR_KEYWORDS	serine/threonine-protein kinase	38	2.67229	0.28148	1.19528e+166	1397	317	13223	1.13464	1	0.813372	99.2814
GOTERM_BP_FAT	GO:0006468~protein amino acid phosphorylation	62	4.36006	0.340322	1.57285e+266	1049	534	9658	1.06896	1	0.977125	99.9507
GOTERM_BP_FAT	GO:0006793~phosphorus metabolic process	88	6.18847	0.468329	157285,5168,1195,2147,124923,2149,5230,8317,8573,8575,7301,11011,5587,10155,780,57761,8493,9448,4215,5603,4216,2264,5608,5649,975,7444,1942,8395,6198,9212,115701,6199,5499,4751,9110,2984,3643,23604,1612,10050,6195,8555,57552,282974,11072,84451,8518,10420,155066,1950,5613,6790,7042,1033,8798,51196,6787,51347,8992,5797,5288,10903,1847,516,10461,375449,1846,57144,92335,55872,4716,699,81788,5566,1111…	1049	795	9658	1.01912	1	0.991748	99.999
GOTERM_BP_FAT	GO:0006796~phosphate metabolic process	88	6.18847	0.468329	157285,5168,1195,2147,124923,2149,5230,8317,8573,8575,7301,11011,5587,10155,780,57761,8493,9448,4215,5603,4216,2264,5608,5649,975,7444,1942,8395,6198,9212,115701,6199,5499,4751,9110,2984,3643,23604,1612,10050,6195,8555,57552,282974,11072,84451,8518,10420,155066,1950,5613,6790,7042,1033,8798,51196,6787,51347,8992,5797,5288,10903,1847,516,10461,375449,1846,57144,92335,55872,4716,699,81788,5566,1111…	1049	795	9658	1.01912	1	0.991748	99.999
GOTERM_MF_FAT	GO:0004674~protein serine/threonine kinase activity	40	2.81294	0.48892	1.19528e+175	994	358	9211	1.03537	1	0.996017	99.998
GOTERM_BP_FAT	GO:0016310~phosphorylation	69	4.85232	0.633496	1.57285e+295	1049	647	9658	0.981876	1	0.998208	100
Annotation Cluster 130	Enrichment Score: 0.6343071097059103
Category	Term	Count	%	PValue	Genes	List Total	Pop Hits	Pop Total	Fold Enrichment	Bonferroni	Benjamini	FDR
GOTERM_BP_FAT	GO:0003007~heart morphogenesis	10	0.703235	0.11515	7.04269e+38	1049	53	9658	1.73714	1	0.84149	89.3451
GOTERM_BP_FAT	GO:0035051~cardiac cell differentiation	5	0.351617	0.187282	7.04256e+19	1049	21	9658	2.19211	1	0.921099	97.7529
GOTERM_BP_FAT	GO:0048738~cardiac muscle tissue development	7	0.492264	0.225602	7.04269e+28	1049	38	9658	1.696	1	0.944783	99.0717
GOTERM_BP_FAT	GO:0055007~cardiac muscle cell differentiation	3	0.21097	0.596581	5629233636256	1049	18	9658	1.53448	1	0.997294	100
Annotation Cluster 131	Enrichment Score: 0.6266306961545366
Category	Term	Count	%	PValue	Genes	List Total	Pop Hits	Pop Total	Fold Enrichment	Bonferroni	Benjamini	FDR
GOTERM_BP_FAT	GO:0042692~muscle cell differentiation	18	1.26582	0.0173829	8.24711e+69	1049	91	9658	1.82114	1	0.456591	27.4548
GOTERM_BP_FAT	GO:0055002~striated muscle cell development	8	0.562588	0.123706	7.11172e+33	1049	39	9658	1.88859	1	0.857172	91.0811
GOTERM_BP_FAT	GO:0055001~muscle cell development	8	0.562588	0.150437	7.11172e+33	1049	41	9658	1.79646	1	0.889897	94.9411
GOTERM_BP_FAT	GO:0051146~striated muscle cell differentiation	11	0.773558	0.151144	8.24711e+43	1049	64	9658	1.58243	1	0.89019	95.0176
GOTERM_BP_FAT	GO:0014706~striated muscle tissue development	13	0.914205	0.174538	2.14938e+52	1049	82	9658	1.45962	1	0.91004	97.0126
GOTERM_BP_FAT	GO:0031032~actomyosin structure organization	5	0.351617	0.187282	7.11113e+20	1049	21	9658	2.19211	1	0.921099	97.7529
GOTERM_BP_FAT	GO:0030239~myofibril assembly	4	0.281294	0.188326	7.11172e+16	1049	14	9658	2.63053	1	0.920931	97.8052
GOTERM_BP_FAT	GO:0060537~muscle tissue development	13	0.914205	0.219199	2.14938e+52	1049	86	9658	1.39174	1	0.941585	98.9207
GOTERM_BP_FAT	GO:0010927~cellular component assembly involved in morphogenesis	5	0.351617	0.284589	7.11172e+19	1049	25	9658	1.84137	1	0.965822	99.7823
GOTERM_BP_FAT	GO:0048741~skeletal muscle fiber development	4	0.281294	0.402483	2.14938e+16	1049	21	9658	1.75369	1	0.985797	99.9919
GOTERM_BP_FAT	GO:0048747~muscle fiber development	4	0.281294	0.519713	2.14938e+16	1049	25	9658	1.4731	1	0.994337	99.9999
GOTERM_CC_FAT	GO:0005901~caveola	6	0.421941	0.526904	2.84119e+23	1000	42	8798	1.25686	1	0.977829	99.998
GOTERM_BP_FAT	GO:0007519~skeletal muscle tissue development	6	0.421941	0.568477	6.84021e+23	1049	46	9658	1.2009	1	0.996457	100
GOTERM_BP_FAT	GO:0060538~skeletal muscle organ development	6	0.421941	0.568477	6.84021e+23	1049	46	9658	1.2009	1	0.996457	100
GOTERM_BP_FAT	GO:0007517~muscle organ development	16	1.12518	0.596021	3.7579e+64	1049	143	9658	1.03014	1	0.9973	100
Annotation Cluster 132	Enrichment Score: 0.6263763781031302
Category	Term	Count	%	PValue	Genes	List Total	Pop Hits	Pop Total	Fold Enrichment	Bonferroni	Benjamini	FDR
UP_SEQ_FEATURE	domain:Ras-GEF	6	0.421941	0.052432	9.77123e+26	1395	20	13210	2.84086	1	0.991907	62.6955
SMART	SM00147:RasGEF	6	0.421941	0.0645371	9.77123e+26	692	21	6501	2.68415	1	0.741007	59.4224
INTERPRO	IPR001895:Guanine-nucleotide dissociation stimulator CDC25	6	0.421941	0.0646123	9.77123e+26	1250	21	11754	2.68663	1	0.95845	67.7423
INTERPRO	IPR019804:Ras guanine-nucleotide exchange factor, conserved site	5	0.351617	0.116355	9.77123e+21	1250	18	11754	2.612	1	0.984877	87.697
INTERPRO	IPR008937:Ras guanine nucleotide exchange factor	4	0.281294	0.298009	9.77123e+17	1250	18	11754	2.0896	1	0.999289	99.7505
UP_SEQ_FEATURE	domain:N-terminal Ras-GEF	3	0.21097	0.480173	97712317925780	1395	15	13210	1.89391	1	1	99.9994
INTERPRO	IPR000651:Guanine nucleotide exchange factor for Ras-like GTPases, N-terminal	3	0.21097	0.519169	97712317925780	1250	16	11754	1.7631	1	0.99997	99.9996
SMART	SM00229:RasGEFN	3	0.21097	0.519434	97712317925780	692	16	6501	1.76147	1	0.980881	99.995
GOTERM_MF_FAT	GO:0005085~guanyl-nucleotide exchange factor activity	13	0.914205	0.718514	5.57856e+59	994	126	9211	0.956078	1	0.999696	100
SP_PIR_KEYWORDS	guanine-nucleotide releasing factor	10	0.703235	0.772374	9.77156e+45	1397	103	13223	0.918959	1	0.985293	100
Annotation Cluster 133	Enrichment Score: 0.6231659700247371
Category	Term	Count	%	PValue	Genes	List Total	Pop Hits	Pop Total	Fold Enrichment	Bonferroni	Benjamini	FDR
SP_PIR_KEYWORDS	urea cycle	3	0.21097	0.125365	445383162417	1397	6	13223	4.73264	1	0.628198	86.4663
GOTERM_BP_FAT	GO:0043604~amide biosynthetic process	3	0.21097	0.254686	445383162417	1049	9	9658	3.06895	1	0.958618	99.5393
GOTERM_BP_FAT	GO:0019627~urea metabolic process	3	0.21097	0.254686	445383162417	1049	9	9658	3.06895	1	0.958618	99.5393
GOTERM_BP_FAT	GO:0000050~urea cycle	3	0.21097	0.254686	445383162417	1049	9	9658	3.06895	1	0.958618	99.5393
GOTERM_BP_FAT	GO:0043603~cellular amide metabolic process	8	0.562588	0.296536	4.19927e+34	1049	50	9658	1.4731	1	0.969051	99.84
GOTERM_BP_FAT	GO:0006525~arginine metabolic process	3	0.21097	0.296984	445383162417	1049	10	9658	2.76206	1	0.968634	99.8419
Annotation Cluster 134	Enrichment Score: 0.6107048803429326
Category	Term	Count	%	PValue	Genes	List Total	Pop Hits	Pop Total	Fold Enrichment	Bonferroni	Benjamini	FDR
GOTERM_BP_FAT	GO:0044057~regulation of system process	31	2.18003	0.0252873	6.75249e+122	1049	192	9658	1.48652	1	0.52107	37.4241
GOTERM_BP_FAT	GO:0031644~regulation of neurological system process	14	0.984529	0.274685	3.67321e+53	1049	99	9658	1.30198	1	0.963645	99.72
GOTERM_BP_FAT	GO:0051969~regulation of transmission of nerve impulse	13	0.914205	0.346897	3.67386e+49	1049	96	9658	1.24676	1	0.978046	99.9589
GOTERM_BP_FAT	GO:0050804~regulation of synaptic transmission	11	0.773558	0.488877	4.91183e+41	1049	88	9658	1.15086	1	0.992582	99.9995
GOTERM_BP_FAT	GO:0048167~regulation of synaptic plasticity	5	0.351617	0.750477	4.91184e+17	1049	46	9658	1.00075	1	0.999671	100
Annotation Cluster 135	Enrichment Score: 0.609894202762458
Category	Term	Count	%	PValue	Genes	List Total	Pop Hits	Pop Total	Fold Enrichment	Bonferroni	Benjamini	FDR
OMIM_DISEASE	Meta-analysis of genome-wide association data and large-scale replication identifies additional susceptibility loci for type 2 diabetes	5	0.351617	0.185943	1.03031e+21	287	18	2255	2.18254	1	1	94.9748
OMIM_DISEASE	Replication of genome-wide association signals in UK samples reveals risk loci for type 2 diabetes	3	0.21097	0.269369	103030875468	287	8	2255	2.94643	1	1	98.9564
OMIM_DISEASE	A genome-wide association study of type 2 diabetes in Finns detects multiple susceptibility variants	3	0.21097	0.269369	103030875468	287	8	2255	2.94643	1	1	98.9564
OMIM_DISEASE	Genome-wide association analysis identifies loci for type 2 diabetes and triglyceride levels	3	0.21097	0.269369	103030875468	287	8	2255	2.94643	1	1	98.9564
Annotation Cluster 136	Enrichment Score: 0.6057102700740133
Category	Term	Count	%	PValue	Genes	List Total	Pop Hits	Pop Total	Fold Enrichment	Bonferroni	Benjamini	FDR
UP_SEQ_FEATURE	metal ion-binding site:Manganese 2	6	0.421941	0.11651	8.49315e+26	1395	25	13210	2.27269	1	0.999554	89.6483
UP_SEQ_FEATURE	metal ion-binding site:Manganese 1	6	0.421941	0.11651	8.49315e+26	1395	25	13210	2.27269	1	0.999554	89.6483
UP_SEQ_FEATURE	metal ion-binding site:Manganese 1; via carbonyl oxygen	4	0.281294	0.150723	8.49315e+19	1395	13	13210	2.9137	1	0.999912	94.9769
UP_SEQ_FEATURE	domain:PP2C-like	4	0.281294	0.150723	8.49315e+19	1395	13	13210	2.9137	1	0.999912	94.9769
SP_PIR_KEYWORDS	manganese	18	1.26582	0.191127	1.477e+82	1397	128	13223	1.33106	1	0.724328	95.7873
INTERPRO	IPR014045:Protein phosphatase 2C, N-terminal	4	0.281294	0.298009	8.49315e+19	1250	18	11754	2.0896	1	0.999289	99.7505
INTERPRO	IPR001932:Protein phosphatase 2C-related	4	0.281294	0.358866	8.49315e+19	1250	20	11754	1.88064	1	0.999689	99.9463
SMART	SM00331:PP2C_SIG	4	0.281294	0.35904	8.49315e+19	692	20	6501	1.8789	1	0.964965	99.7554
SMART	SM00332:PP2Cc	4	0.281294	0.35904	8.49315e+19	692	20	6501	1.8789	1	0.964965	99.7554
INTERPRO	IPR000222:Protein phosphatase 2C, manganese/magnesium aspartate binding site	3	0.21097	0.484004	849314769980895	1250	15	11754	1.88064	1	0.999949	99.9986
INTERPRO	IPR015655:Protein phosphatase 2C	3	0.21097	0.552694	849314769980895	1250	17	11754	1.65939	1	0.999983	99.9999
Annotation Cluster 137	Enrichment Score: 0.6047619967503304
Category	Term	Count	%	PValue	Genes	List Total	Pop Hits	Pop Total	Fold Enrichment	Bonferroni	Benjamini	FDR
GOTERM_MF_FAT	GO:0003714~transcription corepressor activity	21	1.47679	0.0684948	2.27975e+94	994	131	9211	1.48549	1	0.854699	68.125
GOTERM_MF_FAT	GO:0016564~transcription repressor activity	38	2.67229	0.102195	2.27977e+171	994	278	9211	1.26666	1	0.894641	82.3976
GOTERM_MF_FAT	GO:0008134~transcription factor binding	48	3.37553	0.695563	5.16823e+203	994	463	9211	0.960684	1	0.999576	100
GOTERM_MF_FAT	GO:0003712~transcription cofactor activity	32	2.25035	0.782577	2.27979e+139	994	323	9211	0.918053	1	0.999903	100
Annotation Cluster 138	Enrichment Score: 0.6018538447563921
Category	Term	Count	%	PValue	Genes	List Total	Pop Hits	Pop Total	Fold Enrichment	Bonferroni	Benjamini	FDR
GOTERM_BP_FAT	GO:0010743~regulation of foam cell differentiation	5	0.351617	0.1044	3.68518e+18	1049	17	9658	2.7079	1	0.823642	86.7095
GOTERM_BP_FAT	GO:0010745~negative regulation of foam cell differentiation	3	0.21097	0.254686	3685546810062	1049	9	9658	3.06895	1	0.958618	99.5393
GOTERM_BP_FAT	GO:0010888~negative regulation of lipid storage	3	0.21097	0.296984	3685546810062	1049	10	9658	2.76206	1	0.968634	99.8419
GOTERM_BP_FAT	GO:0010883~regulation of lipid storage	3	0.21097	0.495618	3685546810062	1049	15	9658	1.84137	1	0.993054	99.9996
Annotation Cluster 139	Enrichment Score: 0.5982791209453822
Category	Term	Count	%	PValue	Genes	List Total	Pop Hits	Pop Total	Fold Enrichment	Bonferroni	Benjamini	FDR
GOTERM_BP_FAT	GO:0007076~mitotic chromosome condensation	4	0.281294	0.133413	6.41512e+19	1049	12	9658	3.06895	1	0.870113	92.7262
GOTERM_CC_FAT	GO:0000796~condensin complex	3	0.21097	0.141825	64151233979918	1000	6	8798	4.399	1	0.779493	89.0415
GOTERM_BP_FAT	GO:0030261~chromosome condensation	5	0.351617	0.143467	6.41512e+23	1049	19	9658	2.42286	1	0.884032	94.125
SP_PIR_KEYWORDS	dna condensation	3	0.21097	0.203599	64151233979918	1397	8	13223	3.54948	1	0.739517	96.6596
GOTERM_BP_FAT	GO:0006323~DNA packaging	10	0.703235	0.42776	3.02111e+44	1049	75	9658	1.22758	1	0.98859	99.9963
GOTERM_BP_FAT	GO:0000070~mitotic sister chromatid segregation	5	0.351617	0.512145	6.41512e+23	1049	34	9658	1.35395	1	0.993996	99.9998
GOTERM_BP_FAT	GO:0000819~sister chromatid segregation	5	0.351617	0.535766	6.41512e+23	1049	35	9658	1.31527	1	0.994986	99.9999
Annotation Cluster 140	Enrichment Score: 0.5954394097654909
Category	Term	Count	%	PValue	Genes	List Total	Pop Hits	Pop Total	Fold Enrichment	Bonferroni	Benjamini	FDR
GOTERM_BP_FAT	GO:0006835~dicarboxylic acid transport	4	0.281294	0.0469822	1.46865e+17	1049	8	9658	4.60343	1	0.653297	58.5541
GOTERM_MF_FAT	GO:0005310~dicarboxylic acid transmembrane transporter activity	4	0.281294	0.0841588	1.46865e+17	994	10	9211	3.70664	1	0.866691	75.7468
GOTERM_MF_FAT	GO:0017153~sodium:dicarboxylate symporter activity	3	0.21097	0.1299	65052841116507	994	6	9211	4.6333	1	0.92126	89.3777
GOTERM_MF_FAT	GO:0015296~anion:cation symporter activity	5	0.351617	0.255561	6.55865e+22	994	24	9211	1.93054	1	0.967151	99.1397
GOTERM_MF_FAT	GO:0005343~organic acid:sodium symporter activity	3	0.21097	0.492006	65052841116507	994	15	9211	1.85332	1	0.99606	99.9982
GOTERM_MF_FAT	GO:0015370~solute:sodium symporter activity	4	0.281294	0.568829	1.12547e+18	994	27	9211	1.37283	1	0.998096	99.9999
GOTERM_BP_FAT	GO:0015711~organic anion transport	4	0.281294	0.668989	9.12365e+17	1049	31	9658	1.18798	1	0.998879	100
GOTERM_MF_FAT	GO:0015294~solute:cation symporter activity	7	0.492264	0.701421	2.34431e+32	994	64	9211	1.01353	1	0.99961	100
Annotation Cluster 141	Enrichment Score: 0.5946938885728651
Category	Term	Count	%	PValue	Genes	List Total	Pop Hits	Pop Total	Fold Enrichment	Bonferroni	Benjamini	FDR
GOTERM_BP_FAT	GO:0010743~regulation of foam cell differentiation	5	0.351617	0.1044	3.68518e+18	1049	17	9658	2.7079	1	0.823642	86.7095
GOTERM_BP_FAT	GO:0019216~regulation of lipid metabolic process	15	1.05485	0.136834	5.15492e+59	1049	94	9658	1.46918	1	0.875121	93.2341
GOTERM_BP_FAT	GO:0010565~regulation of cellular ketone metabolic process	9	0.632911	0.169584	2.18092e+34	1049	50	9658	1.65724	1	0.907904	96.6669
GOTERM_BP_FAT	GO:0019217~regulation of fatty acid metabolic process	7	0.492264	0.341868	2.18092e+26	1049	44	9658	1.46473	1	0.976936	99.9527
GOTERM_BP_FAT	GO:0046320~regulation of fatty acid oxidation	4	0.281294	0.547054	2.18092e+15	1049	26	9658	1.41644	1	0.995583	99.9999
GOTERM_BP_FAT	GO:0045923~positive regulation of fatty acid metabolic process	3	0.21097	0.596581	183546810062	1049	18	9658	1.53448	1	0.997294	100
Annotation Cluster 142	Enrichment Score: 0.5938765302929898
Category	Term	Count	%	PValue	Genes	List Total	Pop Hits	Pop Total	Fold Enrichment	Bonferroni	Benjamini	FDR
GOTERM_BP_FAT	GO:0035295~tube development	29	2.03938	0.0276665	3.08752e+116	1049	178	9658	1.49999	1	0.544763	40.1615
GOTERM_BP_FAT	GO:0060429~epithelium development	27	1.89873	0.0323229	2.81052e+107	1049	165	9658	1.50658	1	0.579255	45.1947
GOTERM_BP_FAT	GO:0035239~tube morphogenesis	18	1.26582	0.0638879	1.02539e+71	1049	106	9658	1.56343	1	0.726725	70.1318
GOTERM_BP_FAT	GO:0048729~tissue morphogenesis	22	1.54712	0.120502	8.34396e+87	1049	148	9658	1.36859	1	0.851696	90.4649
GOTERM_BP_FAT	GO:0060562~epithelial tube morphogenesis	10	0.703235	0.240398	8.32318e+38	1049	63	9658	1.46141	1	0.952892	99.3479
GOTERM_BP_FAT	GO:0002009~morphogenesis of an epithelium	13	0.914205	0.306797	5.62985e+49	1049	93	9658	1.28698	1	0.971276	99.8778
GOTERM_BP_FAT	GO:0001838~embryonic epithelial tube formation	6	0.421941	0.463193	8.32385e+25	1049	41	9658	1.34735	1	0.991395	99.9989
GOTERM_BP_FAT	GO:0014020~primary neural tube formation	5	0.351617	0.463354	8.32385e+20	1049	32	9658	1.43857	1	0.991325	99.9989
GOTERM_BP_FAT	GO:0035148~tube lumen formation	6	0.421941	0.484976	8.32385e+25	1049	42	9658	1.31527	1	0.992474	99.9995
GOTERM_BP_FAT	GO:0016331~morphogenesis of embryonic epithelium	7	0.492264	0.55864	8.32385e+29	1049	55	9658	1.17178	1	0.996093	100
GOTERM_BP_FAT	GO:0001843~neural tube closure	4	0.281294	0.623294	8.32385e+15	1049	29	9658	1.26991	1	0.998009	100
GOTERM_BP_FAT	GO:0060606~tube closure	4	0.281294	0.623294	8.32385e+15	1049	29	9658	1.26991	1	0.998009	100
GOTERM_BP_FAT	GO:0001841~neural tube formation	5	0.351617	0.623964	8.32385e+20	1049	39	9658	1.18037	1	0.998009	100
GOTERM_BP_FAT	GO:0021915~neural tube development	7	0.492264	0.677637	8.32356e+27	1049	62	9658	1.03948	1	0.999024	100
Annotation Cluster 143	Enrichment Score: 0.5895678813273537
Category	Term	Count	%	PValue	Genes	List Total	Pop Hits	Pop Total	Fold Enrichment	Bonferroni	Benjamini	FDR
GOTERM_BP_FAT	GO:0050808~synapse organization	10	0.703235	0.0496094	4.91289e+40	1049	45	9658	2.04597	1	0.662333	60.5961
GOTERM_BP_FAT	GO:0007416~synaptogenesis	7	0.492264	0.0556331	9.36938e+30	1049	26	9658	2.47877	1	0.700775	64.925
GOTERM_BP_FAT	GO:0007156~homophilic cell adhesion	12	0.843882	0.0892811	2.85131e+49	1049	65	9658	1.69973	1	0.793811	81.9447
GOTERM_BP_FAT	GO:0016339~calcium-dependent cell-cell adhesion	4	0.281294	0.188326	5.61226e+17	1049	14	9658	2.63053	1	0.920931	97.8052
INTERPRO	IPR000233:Cadherin cytoplasmic region	3	0.21097	0.246836	285131000999	1250	9	11754	3.1344	1	0.998476	99.1784
PIR_SUPERFAMILY	PIRSF002504:cadherin	3	0.21097	0.283659	285131000999	589	9	5036	2.85003	1	1	99.2979
UP_SEQ_FEATURE	domain:Cadherin 4	7	0.492264	0.356742	2.85136e+29	1395	46	13210	1.44102	1	1	99.969
UP_SEQ_FEATURE	domain:Cadherin 3	7	0.492264	0.356742	2.85136e+29	1395	46	13210	1.44102	1	1	99.969
UP_SEQ_FEATURE	domain:Cadherin 1	7	0.492264	0.395951	2.85136e+29	1395	48	13210	1.38097	1	1	99.9902
UP_SEQ_FEATURE	domain:Cadherin 2	7	0.492264	0.395951	2.85136e+29	1395	48	13210	1.38097	1	1	99.9902
INTERPRO	IPR002126:Cadherin	7	0.492264	0.441853	2.85136e+29	1250	50	11754	1.31645	1	0.999926	99.9949
SMART	SM00112:CA	7	0.492264	0.442192	2.85136e+29	692	50	6501	1.31523	1	0.971803	99.9626
UP_SEQ_FEATURE	domain:Cadherin 5	6	0.421941	0.501696	2.85136e+25	1395	44	13210	1.2913	1	1	99.9997
UP_SEQ_FEATURE	domain:Cadherin 6	3	0.21097	0.876913	56122577171015	1395	33	13210	0.860867	1	1	100
Annotation Cluster 144	Enrichment Score: 0.5872889378559539
Category	Term	Count	%	PValue	Genes	List Total	Pop Hits	Pop Total	Fold Enrichment	Bonferroni	Benjamini	FDR
SMART	SM00005:DEATH	6	0.421941	0.103815	8.79729e+25	692	24	6501	2.34863	1	0.800957	77.279
INTERPRO	IPR000488:Death	6	0.421941	0.103892	8.79729e+25	1250	24	11754	2.3508	1	0.98064	84.4031
UP_SEQ_FEATURE	repeat:TNFR-Cys 4	3	0.21097	0.244276	3604498227242	1395	9	13210	3.15651	1	0.999996	99.4071
UP_SEQ_FEATURE	repeat:TNFR-Cys 3	4	0.281294	0.264227	8.79736e+16	1395	17	13210	2.22813	1	0.999998	99.6367
UP_SEQ_FEATURE	domain:Death	5	0.351617	0.267423	8.79729e+21	1395	25	13210	1.89391	1	0.999998	99.6646
UP_SEQ_FEATURE	repeat:TNFR-Cys 2	4	0.281294	0.294244	8.79736e+16	1395	18	13210	2.10434	1	0.999999	99.8306
UP_SEQ_FEATURE	repeat:TNFR-Cys 1	4	0.281294	0.294244	8.79736e+16	1395	18	13210	2.10434	1	0.999999	99.8306
INTERPRO	IPR001368:TNFR/CD27/30/40/95 cysteine-rich region	4	0.281294	0.38907	8.79736e+16	1250	21	11754	1.79109	1	0.999799	99.9763
SMART	SM00208:TNFR	4	0.281294	0.389273	8.79736e+16	692	21	6501	1.78943	1	0.966602	99.8727
INTERPRO	IPR011029:DEATH-like	6	0.421941	0.548924	8.79729e+23	1250	46	11754	1.2265	1	0.999983	99.9999
Annotation Cluster 145	Enrichment Score: 0.5835491380249268
Category	Term	Count	%	PValue	Genes	List Total	Pop Hits	Pop Total	Fold Enrichment	Bonferroni	Benjamini	FDR
GOTERM_BP_FAT	GO:0045807~positive regulation of endocytosis	6	0.421941	0.069514	3.67372e+19	1049	21	9658	2.63053	1	0.743818	73.252
GOTERM_BP_FAT	GO:0050766~positive regulation of phagocytosis	3	0.21097	0.171134	3673718197	1049	7	9658	3.9458	1	0.908483	96.7789
GOTERM_BP_FAT	GO:0050764~regulation of phagocytosis	3	0.21097	0.338886	3673718197	1049	11	9658	2.51096	1	0.977124	99.9487
GOTERM_BP_FAT	GO:0030100~regulation of endocytosis	7	0.492264	0.482327	3.67372e+24	1049	51	9658	1.26369	1	0.992423	99.9994
GOTERM_BP_FAT	GO:0060627~regulation of vesicle-mediated transport	9	0.632911	0.621516	1.15827e+34	1049	78	9658	1.06233	1	0.997971	100
Annotation Cluster 146	Enrichment Score: 0.5771912088827884
Category	Term	Count	%	PValue	Genes	List Total	Pop Hits	Pop Total	Fold Enrichment	Bonferroni	Benjamini	FDR
GOTERM_BP_FAT	GO:0032967~positive regulation of collagen biosynthetic process	3	0.21097	0.171134	367321472149	1049	7	9658	3.9458	1	0.908483	96.7789
GOTERM_BP_FAT	GO:0010714~positive regulation of collagen metabolic process	3	0.21097	0.171134	367321472149	1049	7	9658	3.9458	1	0.908483	96.7789
GOTERM_BP_FAT	GO:0032965~regulation of collagen biosynthetic process	3	0.21097	0.254686	367321472149	1049	9	9658	3.06895	1	0.958618	99.5393
GOTERM_BP_FAT	GO:0010712~regulation of collagen metabolic process	3	0.21097	0.296984	367321472149	1049	10	9658	2.76206	1	0.968634	99.8419
GOTERM_BP_FAT	GO:0044253~positive regulation of multicellular organismal metabolic process	3	0.21097	0.338886	367321472149	1049	11	9658	2.51096	1	0.977124	99.9487
GOTERM_BP_FAT	GO:0044246~regulation of multicellular organismal metabolic process	3	0.21097	0.458554	367321472149	1049	14	9658	1.9729	1	0.991277	99.9987
Annotation Cluster 147	Enrichment Score: 0.561914194366959
Category	Term	Count	%	PValue	Genes	List Total	Pop Hits	Pop Total	Fold Enrichment	Bonferroni	Benjamini	FDR
GOTERM_BP_FAT	GO:0032504~multicellular organism reproduction	47	3.3052	0.0782886	9319,9514,7498,5104,10420,2189,22994,1312,283,4000,51174,7042,9191,8890,23424,4090,10468,5139,1543,3074,54852,7044,5889,4323,3306,638,1111,10491,652,858,650,857,3014,9232,491,64224,84953,6198,994,8195,183,51,891,7079,4957,898,56603	1049	345	9658	1.25427	1	0.771623	77.5107
GOTERM_BP_FAT	GO:0048609~reproductive process in a multicellular organism	47	3.3052	0.0782886	9319,9514,7498,5104,10420,2189,22994,1312,283,4000,51174,7042,9191,8890,23424,4090,10468,5139,1543,3074,54852,7044,5889,4323,3306,638,1111,10491,652,858,650,857,3014,9232,491,64224,84953,6198,994,8195,183,51,891,7079,4957,898,56603	1049	345	9658	1.25427	1	0.771623	77.5107
GOTERM_BP_FAT	GO:0019953~sexual reproduction	39	2.74262	0.279335	9319,9514,6774,5104,10420,2189,928,1047,22994,283,4000,51174,9191,23424,4090,5139,10468,3074,54852,7044,5889,3306,638,1111,10491,652,3014,9232,64224,6674,84953,994,6198,8195,183,51,891,4957,56603	1049	319	9658	1.1256	1	0.964603	99.7511
GOTERM_BP_FAT	GO:0007276~gamete generation	35	2.46132	0.295708	9319,9514,5104,10420,2189,22994,4000,283,51174,9191,23424,4090,5139,10468,3074,54852,7044,5889,3306,638,1111,10491,652,3014,9232,64224,84953,994,6198,8195,183,51,891,4957,56603	1049	284	9658	1.13465	1	0.968997	99.8365
GOTERM_BP_FAT	GO:0003006~reproductive developmental process	24	1.68776	0.348525	9.31933e+89	1049	193	9658	1.14489	1	0.978319	99.9608
GOTERM_BP_FAT	GO:0048232~male gamete generation	21	1.47679	0.812813	9319,3306,9514,638,5104,10420,2189,10491,22994,3014,4000,9232,51174,9191,64224,84953,8195,51,4957,5889,56603	1049	217	9658	0.890987	1	0.999892	100
GOTERM_BP_FAT	GO:0007283~spermatogenesis	21	1.47679	0.812813	9319,3306,9514,638,5104,10420,2189,10491,22994,3014,4000,9232,51174,9191,64224,84953,8195,51,4957,5889,56603	1049	217	9658	0.890987	1	0.999892	100
Annotation Cluster 148	Enrichment Score: 0.5609547561874209
Category	Term	Count	%	PValue	Genes	List Total	Pop Hits	Pop Total	Fold Enrichment	Bonferroni	Benjamini	FDR
GOTERM_BP_FAT	GO:0007600~sensory perception	37	2.60197	0.129024	7.10111e+159	1049	274	9658	1.24326	1	0.86492	92.0215
GOTERM_BP_FAT	GO:0050877~neurological system process	64	4.5007	0.191067	9.51466e+271	1049	522	9658	1.12881	1	0.923433	97.937
GOTERM_BP_FAT	GO:0050890~cognition	42	2.95359	0.255966	7.10111e+179	1049	341	9658	1.13398	1	0.958568	99.5536
SP_PIR_KEYWORDS	retinitis pigmentosa	5	0.351617	0.267695	1.00838e+20	1397	25	13223	1.89306	1	0.797008	99.0456
GOTERM_BP_FAT	GO:0007601~visual perception	18	1.26582	0.272895	1.28071e+76	1049	133	9658	1.24604	1	0.963433	99.7071
GOTERM_BP_FAT	GO:0050953~sensory perception of light stimulus	18	1.26582	0.272895	1.28071e+76	1049	133	9658	1.24604	1	0.963433	99.7071
SP_PIR_KEYWORDS	vision	11	0.773558	0.306825	1.00836e+44	1397	78	13223	1.33485	1	0.828727	99.5796
SP_PIR_KEYWORDS	sensory transduction	12	0.843882	0.842947	1.00836e+49	1397	133	13223	0.85401	1	0.992784	100
Annotation Cluster 149	Enrichment Score: 0.5467291915455832
Category	Term	Count	%	PValue	Genes	List Total	Pop Hits	Pop Total	Fold Enrichment	Bonferroni	Benjamini	FDR
GOTERM_MF_FAT	GO:0005164~tumor necrosis factor receptor binding	4	0.281294	0.157891	4.05011e+17	994	13	9211	2.85126	1	0.936193	93.7283
INTERPRO	IPR006052:Tumor Necrosis Factor	3	0.21097	0.246836	4050106738743	1250	9	11754	3.1344	1	0.998476	99.1784
SMART	SM00207:TNF	3	0.21097	0.246921	4050106738743	692	9	6501	3.1315	1	0.927574	97.8377
INTERPRO	IPR008983:Tumour necrosis factor-like	4	0.281294	0.418908	2.36004e+17	1250	22	11754	1.70967	1	0.999879	99.9898
GOTERM_MF_FAT	GO:0032813~tumor necrosis factor receptor superfamily binding	4	0.281294	0.458047	4.05011e+17	994	23	9211	1.61158	1	0.994833	99.9948
Annotation Cluster 150	Enrichment Score: 0.5462893429487423
Category	Term	Count	%	PValue	Genes	List Total	Pop Hits	Pop Total	Fold Enrichment	Bonferroni	Benjamini	FDR
SMART	SM00060:FN3	18	1.26582	0.140125	3.92618e+80	692	121	6501	1.39753	1	0.858654	87.0108
INTERPRO	IPR003961:Fibronectin, type III	18	1.26582	0.140827	3.92618e+80	1250	121	11754	1.39882	1	0.988408	92.3545
INTERPRO	IPR008957:Fibronectin, type III-like fold	15	1.05485	0.300706	3.56161e+62	1250	112	11754	1.25936	1	0.999224	99.7663
UP_SEQ_FEATURE	domain:Fibronectin type-III 2	11	0.773558	0.364056	6.09161e+45	1395	82	13210	1.2703	1	1	99.9748
UP_SEQ_FEATURE	domain:Fibronectin type-III 1	11	0.773558	0.364056	6.09161e+45	1395	82	13210	1.2703	1	1	99.9748
UP_SEQ_FEATURE	domain:Fibronectin type-III 3	6	0.421941	0.670788	6.09161e+23	1395	53	13210	1.07202	1	1	100
Annotation Cluster 151	Enrichment Score: 0.5452934829406433
Category	Term	Count	%	PValue	Genes	List Total	Pop Hits	Pop Total	Fold Enrichment	Bonferroni	Benjamini	FDR
GOTERM_BP_FAT	GO:0006575~cellular amino acid derivative metabolic process	18	1.26582	0.168431	2.93867e+70	1049	122	9658	1.35839	1	0.907066	96.5811
GOTERM_BP_FAT	GO:0042398~cellular amino acid derivative biosynthetic process	6	0.421941	0.284764	7.04267e+24	1049	33	9658	1.67398	1	0.965571	99.7832
GOTERM_BP_FAT	GO:0042401~biogenic amine biosynthetic process	4	0.281294	0.309563	7.04267e+16	1049	18	9658	2.04597	1	0.971533	99.8864
GOTERM_BP_FAT	GO:0006576~biogenic amine metabolic process	9	0.632911	0.443783	4.91704e+35	1049	67	9658	1.23674	1	0.989793	99.9978
Annotation Cluster 152	Enrichment Score: 0.5378409431359473
Category	Term	Count	%	PValue	Genes	List Total	Pop Hits	Pop Total	Fold Enrichment	Bonferroni	Benjamini	FDR
GOTERM_BP_FAT	GO:0050974~detection of mechanical stimulus involved in sensory perception	4	0.281294	0.0854963	491367381956558	1049	10	9658	3.68275	1	0.788644	80.5208
GOTERM_BP_FAT	GO:0050982~detection of mechanical stimulus	4	0.281294	0.133413	491367381956558	1049	12	9658	3.06895	1	0.870113	92.7262
GOTERM_BP_FAT	GO:0050910~detection of mechanical stimulus involved in sensory perception of sound	3	0.21097	0.212517	49181956558	1049	8	9658	3.45257	1	0.937326	98.7385
GOTERM_BP_FAT	GO:0050906~detection of stimulus involved in sensory perception	4	0.281294	0.278515	491367381956558	1049	17	9658	2.16632	1	0.964887	99.7458
GOTERM_BP_FAT	GO:0009582~detection of abiotic stimulus	5	0.351617	0.535766	4.91367e+19	1049	35	9658	1.31527	1	0.994986	99.9999
GOTERM_BP_FAT	GO:0009581~detection of external stimulus	5	0.351617	0.581198	4.91367e+19	1049	37	9658	1.24417	1	0.996867	100
GOTERM_BP_FAT	GO:0051606~detection of stimulus	6	0.421941	0.817382	4.91367e+24	1049	62	9658	0.890987	1	0.999899	100
Annotation Cluster 153	Enrichment Score: 0.5245661111247052
Category	Term	Count	%	PValue	Genes	List Total	Pop Hits	Pop Total	Fold Enrichment	Bonferroni	Benjamini	FDR
GOTERM_MF_FAT	GO:0019900~kinase binding	21	1.47679	0.194292	8.02797e+88	994	151	9211	1.28873	1	0.948754	96.9229
GOTERM_MF_FAT	GO:0019901~protein kinase binding	17	1.1955	0.259687	8.02797e+73	994	124	9211	1.27042	1	0.968129	99.2134
GOTERM_MF_FAT	GO:0019899~enzyme binding	49	3.44585	0.528926	55785,6774,8535,332,7301,3728,23468,8165,23406,2152,23303,57761,80279,27035,5074,4688,84953,2,10577,25780,8826,8724,8452,4751,55704,3643,1000,5104,3843,6790,1030,51196,1543,26960,1111,9734,5566,7153,5345,858,857,8754,3014,5903,462,5002,54843,2869,999	994	446	9211	1.01808	1	0.997276	99.9995
Annotation Cluster 154	Enrichment Score: 0.5239125119314405
Category	Term	Count	%	PValue	Genes	List Total	Pop Hits	Pop Total	Fold Enrichment	Bonferroni	Benjamini	FDR
KEGG_PATHWAY	hsa05414:Dilated cardiomyopathy	12	0.843882	0.0468888	7.04237e+45	436	53	3618	1.87883	0.999832	0.662617	44.6823
KEGG_PATHWAY	hsa05412:Arrhythmogenic right ventricular cardiomyopathy (ARVC)	11	0.773558	0.0624756	3.68518e+43	436	49	3618	1.86285	0.999992	0.688911	54.8584
KEGG_PATHWAY	hsa04512:ECM-receptor interaction	12	0.843882	0.0660696	7.06039e+49	436	56	3618	1.77818	0.999996	0.675258	56.9462
KEGG_PATHWAY	hsa05410:Hypertrophic cardiomyopathy (HCM)	9	0.632911	0.229953	7.04237e+34	436	49	3618	1.52415	1	0.917029	96.0108
UP_SEQ_FEATURE	short sequence motif:GFFKR motif	3	0.21097	0.244276	368536733655	1395	9	13210	3.15651	1	0.999996	99.4071
GOTERM_CC_FAT	GO:0008305~integrin complex	4	0.281294	0.302911	3.68537e+15	1000	17	8798	2.07012	1	0.898713	99.4573
INTERPRO	IPR013649:Integrin alpha-2	3	0.21097	0.329321	368536733655	1250	11	11754	2.56451	1	0.999483	99.8848
INTERPRO	IPR000413:Integrin alpha chain	3	0.21097	0.329321	368536733655	1250	11	11754	2.56451	1	0.999483	99.8848
INTERPRO	IPR018184:Integrin alpha chain, C-terminal cytoplasmic region, conserved site	3	0.21097	0.329321	368536733655	1250	11	11754	2.56451	1	0.999483	99.8848
UP_SEQ_FEATURE	repeat:FG-GAP 5	3	0.21097	0.366368	368536733655	1395	12	13210	2.36738	1	1	99.9765
UP_SEQ_FEATURE	repeat:FG-GAP 4	3	0.21097	0.366368	368536733655	1395	12	13210	2.36738	1	1	99.9765
UP_SEQ_FEATURE	repeat:FG-GAP 7	3	0.21097	0.366368	368536733655	1395	12	13210	2.36738	1	1	99.9765
UP_SEQ_FEATURE	repeat:FG-GAP 6	3	0.21097	0.366368	368536733655	1395	12	13210	2.36738	1	1	99.9765
UP_SEQ_FEATURE	repeat:FG-GAP 1	3	0.21097	0.366368	368536733655	1395	12	13210	2.36738	1	1	99.9765
UP_SEQ_FEATURE	repeat:FG-GAP 3	3	0.21097	0.366368	368536733655	1395	12	13210	2.36738	1	1	99.9765
UP_SEQ_FEATURE	repeat:FG-GAP 2	3	0.21097	0.366368	368536733655	1395	12	13210	2.36738	1	1	99.9765
INTERPRO	IPR013519:Integrin alpha beta-propellor	3	0.21097	0.36973	368536733655	1250	12	11754	2.3508	1	0.99973	99.9598
SMART	SM00191:Int_alpha	3	0.21097	0.369892	368536733655	692	12	6501	2.34863	1	0.964042	99.8058
SP_PIR_KEYWORDS	heterodimer	9	0.632911	0.379348	8.24369e+33	1397	65	13223	1.31058	1	0.866445	99.9193
INTERPRO	IPR013517:FG-GAP	3	0.21097	0.484004	368536733655	1250	15	11754	1.88064	1	0.999949	99.9986
SP_PIR_KEYWORDS	integrin	4	0.281294	0.500404	3.68537e+15	1397	25	13223	1.51445	1	0.925157	99.9968
KEGG_PATHWAY	hsa05222:Small cell lung cancer	9	0.632911	0.710148	3.91837e+34	436	76	3618	0.982677	1	0.976146	100
GOTERM_CC_FAT	GO:0043235~receptor complex	5	0.351617	0.958526	3.68537e+19	1000	68	8798	0.646912	1	0.999856	100
Annotation Cluster 155	Enrichment Score: 0.519229312282198
Category	Term	Count	%	PValue	Genes	List Total	Pop Hits	Pop Total	Fold Enrichment	Bonferroni	Benjamini	FDR
GOTERM_BP_FAT	GO:0042698~ovulation cycle	10	0.703235	0.086678	7.04218e+34	1049	50	9658	1.84137	1	0.791716	80.9764
GOTERM_BP_FAT	GO:0022602~ovulation cycle process	8	0.562588	0.227314	7.04218e+27	1049	46	9658	1.60119	1	0.945636	99.1085
GOTERM_BP_FAT	GO:0008585~female gonad development	8	0.562588	0.261271	1.83889e+28	1049	48	9658	1.53448	1	0.95929	99.6084
GOTERM_BP_FAT	GO:0001541~ovarian follicle development	6	0.421941	0.263039	8.89022e+20	1049	32	9658	1.72629	1	0.959918	99.6252
GOTERM_BP_FAT	GO:0048511~rhythmic process	13	0.914205	0.293703	5.08652e+47	1049	92	9658	1.30097	1	0.968424	99.8278
GOTERM_BP_FAT	GO:0046545~development of primary female sexual characteristics	8	0.562588	0.332743	1.83889e+28	1049	52	9658	1.41644	1	0.976771	99.9392
GOTERM_BP_FAT	GO:0046660~female sex differentiation	8	0.562588	0.332743	1.83889e+28	1049	52	9658	1.41644	1	0.976771	99.9392
GOTERM_BP_FAT	GO:0003006~reproductive developmental process	24	1.68776	0.348525	9.31933e+89	1049	193	9658	1.14489	1	0.978319	99.9608
GOTERM_BP_FAT	GO:0045137~development of primary sexual characteristics	13	0.914205	0.401612	6.38321e+46	1049	100	9658	1.19689	1	0.985914	99.9917
GOTERM_BP_FAT	GO:0048608~reproductive structure development	12	0.843882	0.443371	8.19518e+42	1049	94	9658	1.17534	1	0.989944	99.9978
GOTERM_BP_FAT	GO:0008406~gonad development	11	0.773558	0.458809	8.19518e+38	1049	86	9658	1.17762	1	0.991217	99.9987
GOTERM_BP_FAT	GO:0007548~sex differentiation	14	0.984529	0.468855	6.38219e+50	1049	114	9658	1.13067	1	0.991724	99.9991
Annotation Cluster 156	Enrichment Score: 0.5088739425997004
Category	Term	Count	%	PValue	Genes	List Total	Pop Hits	Pop Total	Fold Enrichment	Bonferroni	Benjamini	FDR
UP_SEQ_FEATURE	domain:TSP N-terminal	4	0.281294	0.177604	7.06074e+16	1395	14	13210	2.70558	1	0.999962	97.2124
INTERPRO	IPR003129:Laminin G, thrombospondin-type, N-terminal	3	0.21097	0.409131	706073734753	1250	13	11754	2.16997	1	0.999854	99.9865
SMART	SM00210:TSPN	3	0.21097	0.40932	706073734753	692	13	6501	2.16796	1	0.967011	99.919
Annotation Cluster 157	Enrichment Score: 0.504514243437119
Category	Term	Count	%	PValue	Genes	List Total	Pop Hits	Pop Total	Fold Enrichment	Bonferroni	Benjamini	FDR
GOTERM_BP_FAT	GO:0045843~negative regulation of striated muscle development	3	0.21097	0.13135	973465255692	1049	6	9658	4.60343	1	0.867845	92.4025
GOTERM_BP_FAT	GO:0048635~negative regulation of muscle development	3	0.21097	0.13135	973465255692	1049	6	9658	4.60343	1	0.867845	92.4025
GOTERM_BP_FAT	GO:0051147~regulation of muscle cell differentiation	6	0.421941	0.263039	3.75791e+24	1049	32	9658	1.72629	1	0.959918	99.6252
GOTERM_BP_FAT	GO:0051153~regulation of striated muscle cell differentiation	5	0.351617	0.284589	3.75791e+20	1049	25	9658	1.84137	1	0.965822	99.7823
GOTERM_BP_FAT	GO:0048641~regulation of skeletal muscle tissue development	4	0.281294	0.462488	6.19838e+16	1049	23	9658	1.60119	1	0.991489	99.9988
GOTERM_BP_FAT	GO:0016202~regulation of striated muscle tissue development	6	0.421941	0.484976	6.19838e+25	1049	42	9658	1.31527	1	0.992474	99.9995
GOTERM_BP_FAT	GO:0048634~regulation of muscle development	6	0.421941	0.484976	6.19838e+25	1049	42	9658	1.31527	1	0.992474	99.9995
GOTERM_BP_FAT	GO:0048742~regulation of skeletal muscle fiber development	3	0.21097	0.65501	3757909734652	1049	20	9658	1.38103	1	0.998653	100
Annotation Cluster 158	Enrichment Score: 0.5029823260499473
Category	Term	Count	%	PValue	Genes	List Total	Pop Hits	Pop Total	Fold Enrichment	Bonferroni	Benjamini	FDR
GOTERM_MF_FAT	GO:0005548~phospholipid transporter activity	5	0.351617	0.20728	2.62075e+22	994	22	9211	2.10605	1	0.944354	97.6318
GOTERM_MF_FAT	GO:0005319~lipid transporter activity	8	0.562588	0.27319	2.62075e+35	994	49	9211	1.51291	1	0.97231	99.4153
GOTERM_BP_FAT	GO:0015914~phospholipid transport	4	0.281294	0.547054	5.2051e+18	1049	26	9658	1.41644	1	0.995583	99.9999
Annotation Cluster 159	Enrichment Score: 0.4959330169087599
Category	Term	Count	%	PValue	Genes	List Total	Pop Hits	Pop Total	Fold Enrichment	Bonferroni	Benjamini	FDR
GOTERM_BP_FAT	GO:0042552~myelination	6	0.421941	0.200653	9.51489e+23	1049	29	9658	1.90487	1	0.929308	98.3414
GOTERM_BP_FAT	GO:0008366~axon ensheathment	6	0.421941	0.241719	9.51489e+23	1049	31	9658	1.78197	1	0.95334	99.3683
GOTERM_BP_FAT	GO:0007272~ensheathment of neurons	6	0.421941	0.241719	9.51489e+23	1049	31	9658	1.78197	1	0.95334	99.3683
GOTERM_BP_FAT	GO:0019228~regulation of action potential in neuron	6	0.421941	0.329082	9.51489e+23	1049	35	9658	1.57832	1	0.976042	99.9328
GOTERM_BP_FAT	GO:0001508~regulation of action potential	6	0.421941	0.441144	9.51489e+23	1049	40	9658	1.38103	1	0.989942	99.9976
GOTERM_BP_FAT	GO:0042391~regulation of membrane potential	9	0.632911	0.621516	9.51489e+34	1049	78	9658	1.06233	1	0.997971	100
Annotation Cluster 160	Enrichment Score: 0.49472596577630407
Category	Term	Count	%	PValue	Genes	List Total	Pop Hits	Pop Total	Fold Enrichment	Bonferroni	Benjamini	FDR
GOTERM_MF_FAT	GO:0030674~protein binding, bridging	13	0.914205	0.0825596	3.01662e+53	994	72	9211	1.67314	1	0.877365	75.0553
GOTERM_MF_FAT	GO:0005070~SH3/SH2 adaptor activity	5	0.351617	0.575814	2.88856e+20	994	37	9211	1.25224	1	0.9981	99.9999
GOTERM_MF_FAT	GO:0060090~molecular adaptor activity	6	0.421941	0.689878	2.88856e+25	994	53	9211	1.04905	1	0.999542	100
Annotation Cluster 161	Enrichment Score: 0.4888745039213282
Category	Term	Count	%	PValue	Genes	List Total	Pop Hits	Pop Total	Fold Enrichment	Bonferroni	Benjamini	FDR
GOTERM_BP_FAT	GO:0045687~positive regulation of glial cell differentiation	3	0.21097	0.212517	49086505468	1049	8	9658	3.45257	1	0.937326	98.7385
GOTERM_BP_FAT	GO:0014015~positive regulation of gliogenesis	3	0.21097	0.254686	49086505468	1049	9	9658	3.06895	1	0.958618	99.5393
GOTERM_BP_FAT	GO:0045685~regulation of glial cell differentiation	4	0.281294	0.278515	65249086505468	1049	17	9658	2.16632	1	0.964887	99.7458
GOTERM_BP_FAT	GO:0014013~regulation of gliogenesis	4	0.281294	0.309563	65249086505468	1049	18	9658	2.04597	1	0.971533	99.8864
GOTERM_BP_FAT	GO:0010720~positive regulation of cell development	8	0.562588	0.497956	7.04261e+29	1049	61	9658	1.20746	1	0.993143	99.9997
GOTERM_BP_FAT	GO:0050769~positive regulation of neurogenesis	7	0.492264	0.501838	6.09161e+25	1049	52	9658	1.23939	1	0.993449	99.9997
Annotation Cluster 162	Enrichment Score: 0.4807977896601642
Category	Term	Count	%	PValue	Genes	List Total	Pop Hits	Pop Total	Fold Enrichment	Bonferroni	Benjamini	FDR
SP_PIR_KEYWORDS	phospholipid biosynthesis	8	0.562588	0.0997713	1.54142e+36	1397	38	13223	1.99269	1	0.569775	79.1818
UP_SEQ_FEATURE	short sequence motif:HXXXXD motif	3	0.21097	0.443571	84803576789926	1395	14	13210	2.02919	1	1	99.9978
INTERPRO	IPR002123:Phospholipid/glycerol acyltransferase	3	0.21097	0.519169	84803576789926	1250	16	11754	1.7631	1	0.99997	99.9996
SMART	SM00563:PlsC	3	0.21097	0.519434	84803576789926	692	16	6501	1.76147	1	0.980881	99.995
Annotation Cluster 163	Enrichment Score: 0.47911061612299555
Category	Term	Count	%	PValue	Genes	List Total	Pop Hits	Pop Total	Fold Enrichment	Bonferroni	Benjamini	FDR
SP_PIR_KEYWORDS	signalosome	3	0.21097	0.244441	28731092064708	1397	9	13223	3.15509	1	0.77539	98.478
GOTERM_CC_FAT	GO:0008180~signalosome	3	0.21097	0.272359	28731092064708	1000	9	8798	2.93267	1	0.880256	98.9911
UP_SEQ_FEATURE	domain:PCI	3	0.21097	0.548722	28731092064708	1395	17	13210	1.67109	1	1	100
Annotation Cluster 164	Enrichment Score: 0.47771678900947234
Category	Term	Count	%	PValue	Genes	List Total	Pop Hits	Pop Total	Fold Enrichment	Bonferroni	Benjamini	FDR
GOTERM_BP_FAT	GO:0050927~positive regulation of positive chemotaxis	4	0.281294	0.160151	3.67322e+15	1049	13	9658	2.83288	1	0.90142	95.9013
GOTERM_BP_FAT	GO:0050926~regulation of positive chemotaxis	4	0.281294	0.160151	3.67322e+15	1049	13	9658	2.83288	1	0.90142	95.9013
GOTERM_BP_FAT	GO:0032103~positive regulation of response to external stimulus	7	0.492264	0.382216	3.67372e+24	1049	46	9658	1.40104	1	0.983186	99.9852
GOTERM_BP_FAT	GO:0050921~positive regulation of chemotaxis	4	0.281294	0.402483	3.67322e+15	1049	21	9658	1.75369	1	0.985797	99.9919
GOTERM_BP_FAT	GO:0050920~regulation of chemotaxis	4	0.281294	0.432777	3.67322e+15	1049	22	9658	1.67398	1	0.988917	99.9969
GOTERM_BP_FAT	GO:0048520~positive regulation of behavior	4	0.281294	0.462488	3.67322e+15	1049	23	9658	1.60119	1	0.991489	99.9988
GOTERM_BP_FAT	GO:0050795~regulation of behavior	4	0.281294	0.573461	3.67322e+15	1049	27	9658	1.36398	1	0.996687	100
Annotation Cluster 165	Enrichment Score: 0.47711225491683446
Category	Term	Count	%	PValue	Genes	List Total	Pop Hits	Pop Total	Fold Enrichment	Bonferroni	Benjamini	FDR
GOTERM_BP_FAT	GO:0046850~regulation of bone remodeling	3	0.21097	0.296984	1976324982	1049	10	9658	2.76206	1	0.968634	99.8419
GOTERM_BP_FAT	GO:0045124~regulation of bone resorption	3	0.21097	0.296984	1976324982	1049	10	9658	2.76206	1	0.968634	99.8419
GOTERM_BP_FAT	GO:0034103~regulation of tissue remodeling	3	0.21097	0.41995	1976324982	1049	13	9658	2.12466	1	0.987662	99.9953
Annotation Cluster 166	Enrichment Score: 0.47699052945578757
Category	Term	Count	%	PValue	Genes	List Total	Pop Hits	Pop Total	Fold Enrichment	Bonferroni	Benjamini	FDR
UP_SEQ_FEATURE	domain:SH3	18	1.26582	0.265753	8.85378e+82	1395	136	13210	1.25332	1	0.999998	99.6503
INTERPRO	IPR011511:Variant SH3	7	0.492264	0.343301	2.71342e+32	1250	45	11754	1.46272	1	0.99959	99.9194
SP_PIR_KEYWORDS	sh3 domain	20	1.40647	0.349029	8.85358e+91	1397	162	13223	1.16855	1	0.852101	99.8355
SMART	SM00326:SH3	20	1.40647	0.359749	8.85358e+91	692	162	6501	1.15982	1	0.9625	99.7591
INTERPRO	IPR001452:Src homology-3 domain	20	1.40647	0.359777	8.85358e+91	1250	162	11754	1.16089	1	0.99967	99.9476
Annotation Cluster 167	Enrichment Score: 0.4761215404774935
Category	Term	Count	%	PValue	Genes	List Total	Pop Hits	Pop Total	Fold Enrichment	Bonferroni	Benjamini	FDR
GOTERM_BP_FAT	GO:0032582~negative regulation of gene-specific transcription	9	0.632911	0.0882393	3.08756e+34	1049	43	9658	1.92702	1	0.792982	81.5629
GOTERM_BP_FAT	GO:0032583~regulation of gene-specific transcription	15	1.05485	0.257304	8.47223e+61	1049	106	9658	1.30286	1	0.95896	99.5681
GOTERM_BP_FAT	GO:0010553~negative regulation of specific transcription from RNA polymerase II promoter	5	0.351617	0.581198	3.08769e+19	1049	37	9658	1.24417	1	0.996867	100
GOTERM_BP_FAT	GO:0010551~regulation of specific transcription from RNA polymerase II promoter	6	0.421941	0.944235	3.08769e+24	1049	80	9658	0.690515	1	0.999999	100
Annotation Cluster 168	Enrichment Score: 0.47144582595588636
Category	Term	Count	%	PValue	Genes	List Total	Pop Hits	Pop Total	Fold Enrichment	Bonferroni	Benjamini	FDR
GOTERM_BP_FAT	GO:0014031~mesenchymal cell development	8	0.562588	0.210938	7.04237e+33	1049	45	9658	1.63678	1	0.937608	98.6914
GOTERM_BP_FAT	GO:0048762~mesenchymal cell differentiation	8	0.562588	0.210938	7.04237e+33	1049	45	9658	1.63678	1	0.937608	98.6914
GOTERM_BP_FAT	GO:0060485~mesenchyme development	8	0.562588	0.227314	7.04237e+33	1049	46	9658	1.60119	1	0.945636	99.1085
GOTERM_BP_FAT	GO:0014033~neural crest cell differentiation	5	0.351617	0.335804	3.67039e+21	1049	27	9658	1.70497	1	0.976598	99.9441
GOTERM_BP_FAT	GO:0014032~neural crest cell development	5	0.351617	0.335804	3.67039e+21	1049	27	9658	1.70497	1	0.976598	99.9441
GOTERM_BP_FAT	GO:0001755~neural crest cell migration	4	0.281294	0.37174	3.67039e+17	1049	20	9658	1.84137	1	0.982428	99.9798
GOTERM_BP_FAT	GO:0001837~epithelial to mesenchymal transition	3	0.21097	0.596581	704265010155	1049	18	9658	1.53448	1	0.997294	100
GOTERM_BP_FAT	GO:0001667~ameboidal cell migration	4	0.281294	0.668989	3.67039e+17	1049	31	9658	1.18798	1	0.998879	100
Annotation Cluster 169	Enrichment Score: 0.46854344760740935
Category	Term	Count	%	PValue	Genes	List Total	Pop Hits	Pop Total	Fold Enrichment	Bonferroni	Benjamini	FDR
UP_SEQ_FEATURE	region of interest:Ligand-binding	6	0.421941	0.101572	7.10171e+24	1395	24	13210	2.36738	1	0.999341	85.9289
BIOCARTA	h_fxrPathway:FXR and LXR Regulation of Cholesterol Metabolism	3	0.21097	0.171922	9971625610062	148	6	1152	3.89189	1	0.994185	90.4313
UP_SEQ_FEATURE	DNA-binding region:Nuclear receptor	6	0.421941	0.28638	7.10171e+24	1395	34	13210	1.67109	1	0.999999	99.7924
UP_SEQ_FEATURE	zinc finger region:NR C4-type	6	0.421941	0.28638	7.10171e+24	1395	34	13210	1.67109	1	0.999999	99.7924
INTERPRO	IPR001628:Zinc finger, nuclear hormone receptor-type	6	0.421941	0.29138	7.10171e+24	1250	34	11754	1.65939	1	0.999207	99.7075
SMART	SM00399:ZnF_C4	6	0.421941	0.291466	7.10171e+24	692	34	6501	1.65785	1	0.942873	99.0518
BIOCARTA	h_nuclearRsPathway:Nuclear Receptors in Lipid Metabolism and Toxicity	6	0.421941	0.307339	1.24452e+24	148	29	1152	1.61044	1	0.995462	98.9621
INTERPRO	IPR001723:Steroid hormone receptor	6	0.421941	0.313008	7.10171e+24	1250	35	11754	1.61198	1	0.999408	99.827
INTERPRO	IPR000536:Nuclear hormone receptor, ligand-binding, core	6	0.421941	0.334834	7.10171e+24	1250	36	11754	1.5672	1	0.99952	99.8999
INTERPRO	IPR008946:Nuclear hormone receptor, ligand-binding	6	0.421941	0.334834	7.10171e+24	1250	36	11754	1.5672	1	0.99952	99.8999
SMART	SM00430:HOLI	6	0.421941	0.334981	7.10171e+24	692	36	6501	1.56575	1	0.957018	99.5975
GOTERM_MF_FAT	GO:0004879~ligand-dependent nuclear receptor activity	7	0.492264	0.356119	7.10171e+27	994	45	9211	1.44147	1	0.987706	99.917
GOTERM_MF_FAT	GO:0003707~steroid hormone receptor activity	6	0.421941	0.368588	7.10171e+24	994	37	9211	1.50269	1	0.987793	99.9394
INTERPRO	IPR013088:Zinc finger, NHR/GATA-type	5	0.351617	0.585554	7.10171e+20	1250	38	11754	1.23726	1	0.999988	100
GOTERM_BP_FAT	GO:0010551~regulation of specific transcription from RNA polymerase II promoter	6	0.421941	0.944235	3.08769e+24	1049	80	9658	0.690515	1	0.999999	100
SP_PIR_KEYWORDS	zinc finger	6	0.421941	0.999147	7.06877e+23	1397	136	13223	0.417586	1	1	100
Annotation Cluster 170	Enrichment Score: 0.4669981939401886
Category	Term	Count	%	PValue	Genes	List Total	Pop Hits	Pop Total	Fold Enrichment	Bonferroni	Benjamini	FDR
GOTERM_MF_FAT	GO:0008509~anion transmembrane transporter activity	16	1.12518	0.0833424	1.18412e+70	994	95	9211	1.56069	1	0.874579	75.396
SP_PIR_KEYWORDS	chloride	9	0.632911	0.117115	5.92721e+39	1397	47	13223	1.8125	1	0.614232	84.4297
GOTERM_MF_FAT	GO:0031404~chloride ion binding	9	0.632911	0.127794	5.92721e+39	994	47	9211	1.77446	1	0.920904	88.9558
GOTERM_MF_FAT	GO:0043168~anion binding	10	0.703235	0.206735	5.75526e+44	994	61	9211	1.51911	1	0.947282	97.6054
GOTERM_BP_FAT	GO:0015698~inorganic anion transport	10	0.703235	0.255004	2.36001e+40	1049	64	9658	1.43857	1	0.958399	99.5429
GOTERM_BP_FAT	GO:0006820~anion transport	14	0.984529	0.274685	1.18412e+58	1049	99	9658	1.30198	1	0.963645	99.72
UP_SEQ_FEATURE	binding site:Chloride	3	0.21097	0.285357	5927211841182	1395	10	13210	2.84086	1	0.999999	99.7869
GOTERM_MF_FAT	GO:0005247~voltage-gated chloride channel activity	3	0.21097	0.416573	118411821193	994	13	9211	2.13845	1	0.991839	99.9831
GOTERM_BP_FAT	GO:0006821~chloride transport	6	0.421941	0.484976	1.18412e+22	1049	42	9658	1.31527	1	0.992474	99.9995
GOTERM_MF_FAT	GO:0008308~voltage-gated anion channel activity	3	0.21097	0.492006	118411821193	994	15	9211	1.85332	1	0.99606	99.9982
GOTERM_MF_FAT	GO:0005254~chloride channel activity	6	0.421941	0.562427	1.18412e+25	994	46	9211	1.20869	1	0.998037	99.9998
GOTERM_MF_FAT	GO:0005253~anion channel activity	6	0.421941	0.601501	1.18412e+25	994	48	9211	1.15832	1	0.998582	100
SP_PIR_KEYWORDS	chloride channel	4	0.281294	0.747713	5.34912e+17	1397	36	13223	1.0517	1	0.981617	100
GOTERM_CC_FAT	GO:0034707~chloride channel complex	4	0.281294	0.776138	5.34912e+17	1000	35	8798	1.00549	1	0.995893	100
GOTERM_CC_FAT	GO:0034702~ion channel complex	7	0.492264	0.982871	3.76478e+28	1000	104	8798	0.592173	1	0.999975	100
Annotation Cluster 171	Enrichment Score: 0.4661065024395651
Category	Term	Count	%	PValue	Genes	List Total	Pop Hits	Pop Total	Fold Enrichment	Bonferroni	Benjamini	FDR
GOTERM_MF_FAT	GO:0016564~transcription repressor activity	38	2.67229	0.102195	2.27977e+171	994	278	9211	1.26666	1	0.894641	82.3976
GOTERM_BP_FAT	GO:0016481~negative regulation of transcription	46	3.23488	0.320806	7.10131e+202	1049	387	9658	1.09436	1	0.974679	99.9159
GOTERM_BP_FAT	GO:0031327~negative regulation of cellular biosynthetic process	55	3.86779	0.32362	3.08768e+238	1049	467	9658	1.08432	1	0.975162	99.922
GOTERM_BP_FAT	GO:0009890~negative regulation of biosynthetic process	56	3.93812	0.324258	3.08768e+242	1049	477	9658	1.08089	1	0.975134	99.9234
GOTERM_BP_FAT	GO:0051172~negative regulation of nitrogen compound metabolic process	51	3.5865	0.326378	3.08768e+222	1049	432	9658	1.08692	1	0.975615	99.9276
GOTERM_BP_FAT	GO:0045892~negative regulation of transcription, DNA-dependent	36	2.53165	0.326591	7.10131e+158	1049	297	9658	1.11598	1	0.975443	99.9281
GOTERM_BP_FAT	GO:0010558~negative regulation of macromolecule biosynthetic process	54	3.79747	0.335257	3.08768e+235	1049	461	9658	1.07846	1	0.976653	99.9432
GOTERM_BP_FAT	GO:0010629~negative regulation of gene expression	50	3.51617	0.356139	3.08768e+218	1049	427	9658	1.07809	1	0.979885	99.9684
GOTERM_BP_FAT	GO:0051253~negative regulation of RNA metabolic process	36	2.53165	0.357097	7.10131e+158	1049	301	9658	1.10115	1	0.97975	99.9692
GOTERM_BP_FAT	GO:0000122~negative regulation of transcription from RNA polymerase II promoter	26	1.82841	0.397106	7.10131e+113	1049	216	9658	1.10823	1	0.985308	99.9905
GOTERM_BP_FAT	GO:0010605~negative regulation of macromolecule metabolic process	70	4.92264	0.404127	3087,6774,3146,8535,6827,8575,283,23468,10589,10614,7068,122953,701,9971,10155,5074,81620,5705,6256,1906,3685,2,57326,6304,7076,9314,3643,115677,29945,10765,6935,58495,7101,5104,8553,221895,1028,1027,27250,6282,1789,6909,9191,5205,9775,8890,6907,10468,5699,54602,11065,79170,83439,5629,5245,9734,2304,652,5720,857,1063,650,5468,996,991,10642,84524,124790,710,2186	1049	619	9658	1.04116	1	0.985976	99.9923
GOTERM_BP_FAT	GO:0045934~negative regulation of nucleobase, nucleoside, nucleotide and nucleic acid metabolic process	49	3.44585	0.411904	3.08768e+215	1049	428	9658	1.05406	1	0.98702	99.994
GOTERM_BP_FAT	GO:0006357~regulation of transcription from RNA polymerase II promoter	57	4.00844	0.843893	3.08768e+243	1049	579	9658	0.906375	1	0.999941	100
Annotation Cluster 172	Enrichment Score: 0.45466377523626017
Category	Term	Count	%	PValue	Genes	List Total	Pop Hits	Pop Total	Fold Enrichment	Bonferroni	Benjamini	FDR
GOTERM_MF_FAT	GO:0046983~protein dimerization activity	52	3.65682	0.199915	6774,332,6519,8575,6827,847,432,1052,10300,122953,23225,5446,128,1182,6091,6092,8029,80273,3956,1510,9586,6877,3248,55704,2569,9603,84451,6282,7042,1806,1803,27111,4783,3074,9429,3131,3673,5154,95,6277,652,7153,858,1063,650,5468,5053,114991,5530,169611,185,1535	994	421	9211	1.14457	1	0.950059	97.2513
GOTERM_MF_FAT	GO:0042803~protein homodimerization activity	30	2.1097	0.382876	8.44513e+118	994	252	9211	1.10317	1	0.989438	99.9581
GOTERM_MF_FAT	GO:0042802~identical protein binding	56	3.93812	0.565073	2.59239e+229	994	517	9211	1.00373	1	0.998048	99.9999
Annotation Cluster 173	Enrichment Score: 0.4510395470083582
Category	Term	Count	%	PValue	Genes	List Total	Pop Hits	Pop Total	Fold Enrichment	Bonferroni	Benjamini	FDR
SP_PIR_KEYWORDS	inflammatory response	8	0.562588	0.177155	1.03446e+33	1397	44	13223	1.72096	1	0.704378	94.5598
GOTERM_MF_FAT	GO:0008009~chemokine activity	5	0.351617	0.255561	1.03446e+21	994	24	9211	1.93054	1	0.967151	99.1397
GOTERM_MF_FAT	GO:0042379~chemokine receptor binding	5	0.351617	0.305785	1.03446e+21	994	26	9211	1.78204	1	0.979322	99.7209
INTERPRO	IPR018048:Small chemokine, C-X-C, conserved site	3	0.21097	0.36973	2919581913576	1250	12	11754	2.3508	1	0.99973	99.9598
INTERPRO	IPR001811:Small chemokine, interleukin-8-like	4	0.281294	0.38907	1.03446e+16	1250	21	11754	1.79109	1	0.999799	99.9763
SMART	SM00199:SCY	4	0.281294	0.389273	1.03446e+16	692	21	6501	1.78943	1	0.966602	99.8727
KEGG_PATHWAY	hsa04062:Chemokine signaling pathway	13	0.914205	0.898036	1.03441e+53	436	134	3618	0.805046	1	0.992698	100
Annotation Cluster 174	Enrichment Score: 0.45103560922398483
Category	Term	Count	%	PValue	Genes	List Total	Pop Hits	Pop Total	Fold Enrichment	Bonferroni	Benjamini	FDR
UP_SEQ_FEATURE	repeat:2-1	4	0.281294	0.324453	1.04711e+15	1395	19	13210	1.99359	1	1	99.9239
UP_SEQ_FEATURE	repeat:1-2	4	0.281294	0.354655	1.04711e+15	1395	20	13210	1.89391	1	1	99.9671
UP_SEQ_FEATURE	repeat:2-2	4	0.281294	0.354655	1.04711e+15	1395	20	13210	1.89391	1	1	99.9671
UP_SEQ_FEATURE	repeat:1-1	4	0.281294	0.384674	1.04711e+15	1395	21	13210	1.80372	1	1	99.9862
Annotation Cluster 175	Enrichment Score: 0.44502406831700486
Category	Term	Count	%	PValue	Genes	List Total	Pop Hits	Pop Total	Fold Enrichment	Bonferroni	Benjamini	FDR
GOTERM_MF_FAT	GO:0042813~Wnt receptor activity	3	0.21097	0.169323	832325357976	994	7	9211	3.9714	1	0.942358	94.9682
UP_SEQ_FEATURE	short sequence motif:Lys-Thr-X-X-X-Trp motif	3	0.21097	0.203455	832325357976	1395	8	13210	3.55108	1	0.999986	98.4467
GOTERM_BP_FAT	GO:0007164~establishment of tissue polarity	3	0.21097	0.212517	832325357976	1049	8	9658	3.45257	1	0.937326	98.7385
UP_SEQ_FEATURE	domain:FZ	4	0.281294	0.23462	8.32325e+16	1395	16	13210	2.36738	1	0.999996	99.252
INTERPRO	IPR000539:Frizzled protein	3	0.21097	0.246836	832325357976	1250	9	11754	3.1344	1	0.998476	99.1784
INTERPRO	IPR015526:Frizzled related	3	0.21097	0.36973	832325357976	1250	12	11754	2.3508	1	0.99973	99.9598
INTERPRO	IPR000024:Frizzled cysteine-rich domain	3	0.21097	0.484004	832325357976	1250	15	11754	1.88064	1	0.999949	99.9986
KEGG_PATHWAY	hsa05217:Basal cell carcinoma	6	0.421941	0.488219	8.32383e+22	436	38	3618	1.31024	1	0.936426	99.9741
INTERPRO	IPR017981:GPCR, family 2-like	5	0.351617	0.563788	8.48738e+21	1250	37	11754	1.2707	1	0.999986	99.9999
KEGG_PATHWAY	hsa04916:Melanogenesis	9	0.632911	0.66563	1.03811e+36	436	73	3618	1.02306	1	0.969153	99.9999
KEGG_PATHWAY	hsa05210:Colorectal cancer	7	0.492264	0.915559	7.04283e+27	436	77	3618	0.754379	1	0.994156	100
Annotation Cluster 176	Enrichment Score: 0.4436158743532228
Category	Term	Count	%	PValue	Genes	List Total	Pop Hits	Pop Total	Fold Enrichment	Bonferroni	Benjamini	FDR
GOTERM_CC_FAT	GO:0031201~SNARE complex	5	0.351617	0.139501	1.06528e+20	1000	18	8798	2.44389	1	0.780019	88.6046
KEGG_PATHWAY	hsa04130:SNARE interactions in vesicular transport	6	0.421941	0.364011	1.0653e+24	436	33	3618	1.50876	1	0.940673	99.6226
INTERPRO	IPR000727:Target SNARE coiled-coil region	4	0.281294	0.448244	5.50758e+16	1250	23	11754	1.63534	1	0.99992	99.9958
SMART	SM00397:t_SNARE	4	0.281294	0.448506	5.50758e+16	692	23	6501	1.63383	1	0.969978	99.968
GOTERM_MF_FAT	GO:0005484~SNAP receptor activity	3	0.21097	0.592851	1065284176809	994	18	9211	1.54443	1	0.998473	99.9999
Annotation Cluster 177	Enrichment Score: 0.4406295690585479
Category	Term	Count	%	PValue	Genes	List Total	Pop Hits	Pop Total	Fold Enrichment	Bonferroni	Benjamini	FDR
SP_PIR_KEYWORDS	Symport	14	0.984529	0.0368638	1.12547e+62	1397	72	13223	1.84047	1	0.36372	42.9256
GOTERM_MF_FAT	GO:0015293~symporter activity	15	1.05485	0.108402	1.12547e+67	994	91	9211	1.52746	1	0.904934	84.2594
INTERPRO	IPR013057:Amino acid transporter, transmembrane	3	0.21097	0.409131	5.50892e+15	1250	13	11754	2.16997	1	0.999854	99.9865
GOTERM_MF_FAT	GO:0031420~alkali metal ion binding	14	0.984529	0.498139	6.55811e+69	994	117	9211	1.10882	1	0.99629	99.9985
SP_PIR_KEYWORDS	Sodium transport	8	0.562588	0.570449	5.50897e+38	1397	67	13223	1.13018	1	0.943624	99.9997
SP_PIR_KEYWORDS	Sodium	8	0.562588	0.586641	5.50897e+38	1397	68	13223	1.11356	1	0.946591	99.9998
GOTERM_MF_FAT	GO:0031402~sodium ion binding	8	0.562588	0.625578	5.50897e+38	994	69	9211	1.07439	1	0.998788	100
GOTERM_BP_FAT	GO:0006814~sodium ion transport	8	0.562588	0.779181	5.50897e+38	1049	80	9658	0.920686	1	0.999808	100
GOTERM_BP_FAT	GO:0015672~monovalent inorganic cation transport	18	1.26582	0.814655	2.70357e+84	1049	187	9658	0.886222	1	0.999893	100
Annotation Cluster 178	Enrichment Score: 0.43551828198861
Category	Term	Count	%	PValue	Genes	List Total	Pop Hits	Pop Total	Fold Enrichment	Bonferroni	Benjamini	FDR
GOTERM_MF_FAT	GO:0035091~phosphoinositide binding	13	0.914205	0.190266	2.2175e+61	994	84	9211	1.43412	1	0.946981	96.6655
UP_SEQ_FEATURE	domain:PX	6	0.421941	0.438186	8.38916e+28	1395	41	13210	1.38579	1	1	99.9974
INTERPRO	IPR001683:Phox-like	6	0.421941	0.465894	8.38916e+28	1250	42	11754	1.34331	1	0.999933	99.9976
SMART	SM00312:PX	6	0.421941	0.466251	8.38916e+28	692	42	6501	1.34207	1	0.971808	99.9794
Annotation Cluster 179	Enrichment Score: 0.4341180233193947
Category	Term	Count	%	PValue	Genes	List Total	Pop Hits	Pop Total	Fold Enrichment	Bonferroni	Benjamini	FDR
GOTERM_BP_FAT	GO:0048730~epidermis morphogenesis	5	0.351617	0.0869701	7.0421e+20	1049	16	9658	2.87714	1	0.791244	81.0874
GOTERM_BP_FAT	GO:0031069~hair follicle morphogenesis	3	0.21097	0.379981	7042104682304	1049	12	9658	2.30172	1	0.983173	99.9841
GOTERM_BP_FAT	GO:0001942~hair follicle development	5	0.351617	0.487987	7.04252e+20	1049	33	9658	1.39498	1	0.992564	99.9995
GOTERM_BP_FAT	GO:0042303~molting cycle	5	0.351617	0.487987	7.04252e+20	1049	33	9658	1.39498	1	0.992564	99.9995
GOTERM_BP_FAT	GO:0022405~hair cycle process	5	0.351617	0.487987	7.04252e+20	1049	33	9658	1.39498	1	0.992564	99.9995
GOTERM_BP_FAT	GO:0042633~hair cycle	5	0.351617	0.487987	7.04252e+20	1049	33	9658	1.39498	1	0.992564	99.9995
GOTERM_BP_FAT	GO:0022404~molting cycle process	5	0.351617	0.487987	7.04252e+20	1049	33	9658	1.39498	1	0.992564	99.9995
Annotation Cluster 180	Enrichment Score: 0.4339075933107994
Category	Term	Count	%	PValue	Genes	List Total	Pop Hits	Pop Total	Fold Enrichment	Bonferroni	Benjamini	FDR
GOTERM_BP_FAT	GO:0009617~response to bacterium	14	0.984529	0.28695	8.49313e+55	1049	100	9658	1.28896	1	0.965956	99.7951
GOTERM_BP_FAT	GO:0002237~response to molecule of bacterial origin	9	0.632911	0.39231	3.76462e+33	1049	64	9658	1.29472	1	0.984923	99.989
GOTERM_BP_FAT	GO:0032496~response to lipopolysaccharide	8	0.562588	0.443447	3.76462e+30	1049	58	9658	1.26991	1	0.98985	99.9978
Annotation Cluster 181	Enrichment Score: 0.4333745996186744
Category	Term	Count	%	PValue	Genes	List Total	Pop Hits	Pop Total	Fold Enrichment	Bonferroni	Benjamini	FDR
UP_SEQ_FEATURE	domain:MATH	3	0.21097	0.366368	42248405339745	1395	12	13210	2.36738	1	1	99.9765
INTERPRO	IPR002083:MATH	3	0.21097	0.36973	42248405339745	1250	12	11754	2.3508	1	0.99973	99.9598
SMART	SM00061:MATH	3	0.21097	0.369892	42248405339745	692	12	6501	2.34863	1	0.964042	99.8058
Annotation Cluster 182	Enrichment Score: 0.4319483182881704
Category	Term	Count	%	PValue	Genes	List Total	Pop Hits	Pop Total	Fold Enrichment	Bonferroni	Benjamini	FDR
INTERPRO	IPR011042:Six-bladed beta-propeller, TolB-like	7	0.492264	0.104375	5.06654e+30	1250	31	11754	2.1233	1	0.979444	84.5446
UP_SEQ_FEATURE	repeat:LDL-receptor class B 1	3	0.21097	0.443571	4811227951950	1395	14	13210	2.02919	1	1	99.9978
UP_SEQ_FEATURE	repeat:LDL-receptor class B 2	3	0.21097	0.443571	4811227951950	1395	14	13210	2.02919	1	1	99.9978
UP_SEQ_FEATURE	repeat:LDL-receptor class B 3	3	0.21097	0.443571	4811227951950	1395	14	13210	2.02919	1	1	99.9978
UP_SEQ_FEATURE	repeat:LDL-receptor class B 4	3	0.21097	0.443571	4811227951950	1395	14	13210	2.02919	1	1	99.9978
INTERPRO	IPR000033:Low-density lipoprotein receptor, YWTD repeat	3	0.21097	0.484004	4811227951950	1250	15	11754	1.88064	1	0.999949	99.9986
SMART	SM00135:LY	3	0.21097	0.484245	4811227951950	692	15	6501	1.8789	1	0.975246	99.987
Annotation Cluster 183	Enrichment Score: 0.4313576767123309
Category	Term	Count	%	PValue	Genes	List Total	Pop Hits	Pop Total	Fold Enrichment	Bonferroni	Benjamini	FDR
GOTERM_BP_FAT	GO:0021987~cerebral cortex development	6	0.421941	0.181084	1.04607e+24	1049	28	9658	1.9729	1	0.914895	97.4177
GOTERM_BP_FAT	GO:0021543~pallium development	6	0.421941	0.329082	1.04607e+24	1049	35	9658	1.57832	1	0.976042	99.9328
GOTERM_BP_FAT	GO:0021537~telencephalon development	7	0.492264	0.462588	1.04607e+27	1049	50	9658	1.28896	1	0.991411	99.9988
GOTERM_BP_FAT	GO:0030900~forebrain development	12	0.843882	0.68264	1.04604e+48	1049	112	9658	0.98645	1	0.999068	100
Annotation Cluster 184	Enrichment Score: 0.4257975366142018
Category	Term	Count	%	PValue	Genes	List Total	Pop Hits	Pop Total	Fold Enrichment	Bonferroni	Benjamini	FDR
INTERPRO	IPR003960:ATPase, AAA-type, conserved site	6	0.421941	0.189066	9.31955e+24	1250	29	11754	1.94549	1	0.996283	97.1271
INTERPRO	IPR003593:ATPase, AAA+ type, core	14	0.984529	0.463466	1.03479e+59	1250	116	11754	1.13487	1	0.999934	99.9974
SMART	SM00382:AAA	14	0.984529	0.46399	1.03479e+59	692	116	6501	1.13382	1	0.972894	99.9782
INTERPRO	IPR003959:ATPase, AAA-type, core	6	0.421941	0.487158	9.31955e+24	1250	43	11754	1.31207	1	0.999945	99.9988
Annotation Cluster 185	Enrichment Score: 0.41949057487409314
Category	Term	Count	%	PValue	Genes	List Total	Pop Hits	Pop Total	Fold Enrichment	Bonferroni	Benjamini	FDR
INTERPRO	IPR000751:M-phase inducer phosphatase	3	0.21097	0.0314558	994995993	1250	3	11754	9.4032	1	0.885363	41.8058
SP_PIR_KEYWORDS	protein phosphatase	18	1.26582	0.0901588	8.55515e+76	1397	114	13223	1.49452	1	0.549592	75.6041
UP_SEQ_FEATURE	domain:Rhodanese	5	0.351617	0.133132	9.94996e+16	1395	19	13210	2.49198	1	0.999753	92.6888
INTERPRO	IPR001763:Rhodanese-like	5	0.351617	0.200096	9.94996e+16	1250	22	11754	2.13709	1	0.996927	97.7219
SMART	SM00450:RHOD	5	0.351617	0.200111	9.94996e+16	692	22	6501	2.13512	1	0.895725	95.1136
SP_PIR_KEYWORDS	phosphoric monoester hydrolase	9	0.632911	0.235063	1.03399e+32	1397	56	13223	1.52121	1	0.768612	98.1702
GOTERM_MF_FAT	GO:0017017~MAP kinase tyrosine/serine/threonine phosphatase activity	3	0.21097	0.335891	1107218471846	994	11	9211	2.52725	1	0.985511	99.8634
GOTERM_MF_FAT	GO:0033549~MAP kinase phosphatase activity	3	0.21097	0.335891	1107218471846	994	11	9211	2.52725	1	0.985511	99.8634
GOTERM_BP_FAT	GO:0016311~dephosphorylation	17	1.1955	0.358243	8.55558e+69	1049	132	9658	1.18573	1	0.979669	99.9702
GOTERM_MF_FAT	GO:0004721~phosphoprotein phosphatase activity	18	1.26582	0.361052	8.55515e+76	994	142	9211	1.17464	1	0.987268	99.9267
GOTERM_BP_FAT	GO:0006470~protein amino acid dephosphorylation	14	0.984529	0.442496	8.55558e+55	1049	112	9658	1.15086	1	0.989924	99.9977
GOTERM_MF_FAT	GO:0004725~protein tyrosine phosphatase activity	11	0.773558	0.450347	8.5551e+43	994	86	9211	1.18526	1	0.994598	99.9935
GOTERM_MF_FAT	GO:0004722~protein serine/threonine phosphatase activity	6	0.421941	0.479031	8.5551e+24	994	42	9211	1.3238	1	0.996009	99.9973
GOTERM_MF_FAT	GO:0016791~phosphatase activity	24	1.68776	0.510897	8.55554e+104	994	211	9211	1.05402	1	0.996741	99.999
GOTERM_MF_FAT	GO:0008138~protein tyrosine/serine/threonine phosphatase activity	5	0.351617	0.575814	8.5551e+20	994	37	9211	1.25224	1	0.9981	99.9999
SP_PIR_KEYWORDS	tyrosine-specific phosphatase	4	0.281294	0.579274	9949959935797	1397	28	13223	1.35218	1	0.94584	99.9998
INTERPRO	IPR000340:Protein-tyrosine phosphatase, dual specificity	4	0.281294	0.63188	8.55511e+16	1250	30	11754	1.25376	1	0.999993	100
INTERPRO	IPR000340:Dual specificity phosphatase, catalytic domain	4	0.281294	0.675859	8.55511e+16	1250	32	11754	1.1754	1	0.999997	100
INTERPRO	IPR000387:Protein-tyrosine phosphatase	7	0.492264	0.702031	8.5551e+28	1250	65	11754	1.01265	1	0.999998	100
INTERPRO	IPR000387:Dual-specific/protein-tyrosine phosphatase, conserved region	7	0.492264	0.716115	8.5551e+28	1250	66	11754	0.997309	1	0.999999	100
SMART	SM00195:DSPc	3	0.21097	0.718782	1107218471846	692	23	6501	1.22537	1	0.995195	100
INTERPRO	IPR016130:Protein-tyrosine phosphatase, active site	7	0.492264	0.801712	8.5551e+28	1250	73	11754	0.901677	1	1	100
UP_SEQ_FEATURE	active site:Phosphocysteine intermediate	6	0.421941	0.848876	8.55511e+24	1395	67	13210	0.848018	1	1	100
UP_SEQ_FEATURE	domain:Tyrosine-protein phosphatase	3	0.21097	0.96558	1107218471846	1395	47	13210	0.604438	1	1	100
Annotation Cluster 186	Enrichment Score: 0.4189842607022921
Category	Term	Count	%	PValue	Genes	List Total	Pop Hits	Pop Total	Fold Enrichment	Bonferroni	Benjamini	FDR
GOTERM_MF_FAT	GO:0031406~carboxylic acid binding	16	1.12518	0.174455	2.34851e+65	994	107	9211	1.38566	1	0.945553	95.4464
GOTERM_MF_FAT	GO:0005542~folic acid binding	3	0.21097	0.25222	23481132354548	994	9	9211	3.08887	1	0.966548	99.0753
GOTERM_MF_FAT	GO:0016597~amino acid binding	6	0.421941	0.368588	2.34811e+25	994	37	9211	1.50269	1	0.987793	99.9394
GOTERM_MF_FAT	GO:0043176~amine binding	7	0.492264	0.701421	2.34811e+30	994	64	9211	1.01353	1	0.99961	100
GOTERM_BP_FAT	GO:0042558~pteridine and derivative metabolic process	3	0.21097	0.706474	234845485053	1049	22	9658	1.25548	1	0.999341	100
Annotation Cluster 187	Enrichment Score: 0.41868411995575217
Category	Term	Count	%	PValue	Genes	List Total	Pop Hits	Pop Total	Fold Enrichment	Bonferroni	Benjamini	FDR
UP_SEQ_FEATURE	region of interest:Interactions with TJP1, TJP2 and TJP3	3	0.21097	0.08963	136613641365	1395	5	13210	5.68172	1	0.998912	82.0806
GOTERM_CC_FAT	GO:0005911~cell-cell junction	21	1.47679	0.128614	2.68729e+89	1000	135	8798	1.36858	1	0.757136	86.3333
GOTERM_CC_FAT	GO:0030057~desmosome	4	0.281294	0.206904	5.49318e+15	1000	14	8798	2.51371	1	0.840081	96.4955
GOTERM_CC_FAT	GO:0016327~apicolateral plasma membrane	12	0.843882	0.268079	5.49318e+52	1000	78	8798	1.35354	1	0.878843	98.9019
GOTERM_CC_FAT	GO:0043296~apical junction complex	11	0.773558	0.344698	5.49318e+48	1000	75	8798	1.29037	1	0.922373	99.778
INTERPRO	IPR006187:Claudin	3	0.21097	0.447282	136613641365	1250	14	11754	2.01497	1	0.999925	99.9957
INTERPRO	IPR017974:Claudin, conserved site	3	0.21097	0.484004	136613641365	1250	15	11754	1.88064	1	0.999949	99.9986
GOTERM_BP_FAT	GO:0016338~calcium-independent cell-cell adhesion	3	0.21097	0.531022	136613641365	1049	16	9658	1.72629	1	0.994841	99.9999
SP_PIR_KEYWORDS	Tight junction	6	0.421941	0.581965	2.71349e+27	1397	48	13223	1.18316	1	0.946189	99.9998
GOTERM_CC_FAT	GO:0070160~occluding junction	7	0.492264	0.640671	2.71349e+32	1000	57	8798	1.08046	1	0.987977	100
GOTERM_CC_FAT	GO:0005923~tight junction	7	0.492264	0.640671	2.71349e+32	1000	57	8798	1.08046	1	0.987977	100
INTERPRO	IPR004031:PMP-22/EMP/MP20/Claudin	3	0.21097	0.643077	136613641365	1250	20	11754	1.41048	1	0.999994	100
KEGG_PATHWAY	hsa04530:Tight junction	10	0.703235	0.92666	6.23727e+44	436	110	3618	0.754379	1	0.995075	100
Annotation Cluster 188	Enrichment Score: 0.41797354017585814
Category	Term	Count	%	PValue	Genes	List Total	Pop Hits	Pop Total	Fold Enrichment	Bonferroni	Benjamini	FDR
GOTERM_BP_FAT	GO:0051480~cytosolic calcium ion homeostasis	12	0.843882	0.153009	2.14751e+46	1049	72	9658	1.53448	1	0.892473	95.2142
GOTERM_BP_FAT	GO:0007204~elevation of cytosolic calcium ion concentration	11	0.773558	0.162391	2.14751e+43	1049	65	9658	1.55808	1	0.903144	96.0969
GOTERM_BP_FAT	GO:0030003~cellular cation homeostasis	24	1.68776	0.19223	3.24021e+101	1049	175	9658	1.26266	1	0.924078	97.9906
GOTERM_BP_FAT	GO:0055080~cation homeostasis	24	1.68776	0.339018	3.24021e+101	1049	192	9658	1.15086	1	0.976939	99.9488
GOTERM_BP_FAT	GO:0006873~cellular ion homeostasis	30	2.1097	0.345676	9.51432e+125	1049	246	9658	1.12279	1	0.977894	99.9575
GOTERM_BP_FAT	GO:0006874~cellular calcium ion homeostasis	15	1.05485	0.365945	5.76202e+58	1049	115	9658	1.2009	1	0.981343	99.9761
GOTERM_BP_FAT	GO:0055082~cellular chemical homeostasis	30	2.1097	0.379782	9.51432e+125	1049	250	9658	1.10482	1	0.983296	99.984
GOTERM_BP_FAT	GO:0006875~cellular metal ion homeostasis	16	1.12518	0.380216	5.76202e+61	1049	125	9658	1.17848	1	0.983059	99.9842
GOTERM_BP_FAT	GO:0055074~calcium ion homeostasis	15	1.05485	0.416541	5.76202e+58	1049	119	9658	1.16053	1	0.987324	99.9948
GOTERM_BP_FAT	GO:0050801~ion homeostasis	31	2.18003	0.42264	9.51432e+129	1049	264	9658	1.08111	1	0.987993	99.9957
GOTERM_BP_FAT	GO:0055065~metal ion homeostasis	16	1.12518	0.441391	5.76202e+61	1049	130	9658	1.13315	1	0.989872	99.9976
GOTERM_BP_FAT	GO:0030005~cellular di-, tri-valent inorganic cation homeostasis	18	1.26582	0.474564	5.76203e+75	1049	151	9658	1.09751	1	0.992293	99.9992
GOTERM_BP_FAT	GO:0055066~di-, tri-valent inorganic cation homeostasis	18	1.26582	0.575163	5.76203e+75	1049	160	9658	1.03577	1	0.996739	100
GOTERM_BP_FAT	GO:0048878~chemical homeostasis	37	2.60197	0.597189	9.51432e+155	1049	341	9658	0.998985	1	0.997291	100
GOTERM_BP_FAT	GO:0042592~homeostatic process	56	3.93812	0.731677	2.14732e+232	1049	543	9658	0.949511	1	0.999543	100
GOTERM_BP_FAT	GO:0019725~cellular homeostasis	33	2.32068	0.749	9.51432e+138	1049	325	9658	0.934851	1	0.999664	100
Annotation Cluster 189	Enrichment Score: 0.4132192910497859
Category	Term	Count	%	PValue	Genes	List Total	Pop Hits	Pop Total	Fold Enrichment	Bonferroni	Benjamini	FDR
UP_SEQ_FEATURE	lipid moiety-binding region:S-geranylgeranyl cysteine	13	0.914205	0.124839	5.87364e+58	1395	79	13210	1.55828	1	0.999714	91.2965
SP_PIR_KEYWORDS	prenylation	17	1.1955	0.214383	5.87364e+75	1397	122	13223	1.31893	1	0.750408	97.2748
UP_SEQ_FEATURE	nucleotide phosphate-binding region:GTP	29	2.03938	0.267667	5.87393e+129	1395	234	13210	1.17357	1	0.999998	99.6666
SP_PIR_KEYWORDS	gtp-binding	31	2.18003	0.314555	5.87393e+138	1397	258	13223	1.1373	1	0.829012	99.6444
GOTERM_BP_FAT	GO:0007264~small GTPase mediated signal transduction	30	2.1097	0.337271	5.87396e+133	1049	245	9658	1.12737	1	0.976839	99.9463
GOTERM_MF_FAT	GO:0005525~GTP binding	34	2.391	0.405515	5.87393e+151	994	291	9211	1.0827	1	0.991345	99.9771
INTERPRO	IPR003579:Ras small GTPase, Rab type	7	0.492264	0.422229	5.87364e+34	1250	49	11754	1.34331	1	0.999881	99.9908
SMART	SM00175:RAB	7	0.492264	0.42253	5.87364e+34	692	49	6501	1.34207	1	0.96733	99.9403
UP_SEQ_FEATURE	short sequence motif:Effector region	10	0.703235	0.425836	5.87362e+45	1395	77	13210	1.22981	1	1	99.9961
PIR_SUPERFAMILY	PIRSF001710:Ras-related protein Rab	4	0.281294	0.451188	5.87364e+17	589	21	5036	1.62859	1	1	99.9866
GOTERM_MF_FAT	GO:0032561~guanyl ribonucleotide binding	34	2.391	0.462506	5.87393e+151	994	298	9211	1.05726	1	0.994996	99.9955
GOTERM_MF_FAT	GO:0019001~guanyl nucleotide binding	34	2.391	0.462506	5.87393e+151	994	298	9211	1.05726	1	0.994996	99.9955
INTERPRO	IPR005225:Small GTP-binding protein	16	1.12518	0.468264	5.87364e+73	1250	135	11754	1.11445	1	0.999932	99.9977
INTERPRO	IPR013753:Ras	12	0.843882	0.485532	5.87362e+55	1250	99	11754	1.13978	1	0.999947	99.9987
INTERPRO	IPR001806:Ras GTPase	13	0.914205	0.49404	5.87364e+61	1250	109	11754	1.12148	1	0.999951	99.999
GOTERM_MF_FAT	GO:0003924~GTPase activity	20	1.40647	0.53405	5.87354e+83	994	176	9211	1.05302	1	0.997398	99.9995
SP_PIR_KEYWORDS	methylation	18	1.26582	0.696887	5.87354e+81	1397	177	13223	0.962571	1	0.973816	100
Annotation Cluster 190	Enrichment Score: 0.40637684788203376
Category	Term	Count	%	PValue	Genes	List Total	Pop Hits	Pop Total	Fold Enrichment	Bonferroni	Benjamini	FDR
GOTERM_BP_FAT	GO:0030199~collagen fibril organization	5	0.351617	0.187282	7.04213e+18	1049	21	9658	2.19211	1	0.921099	97.7529
GOTERM_MF_FAT	GO:0005201~extracellular matrix structural constituent	8	0.562588	0.238974	1.28041e+32	994	47	9211	1.57729	1	0.961517	98.7729
SP_PIR_KEYWORDS	trimer	4	0.281294	0.294488	7.06013e+15	1397	18	13223	2.1034	1	0.818194	99.453
SP_PIR_KEYWORDS	collagen	8	0.562588	0.342741	2.65772e+36	1397	54	13223	1.40226	1	0.84761	99.8101
SP_PIR_KEYWORDS	hydroxylation	7	0.492264	0.376751	1.28072e+28	1397	47	13223	1.40972	1	0.869355	99.9141
SP_PIR_KEYWORDS	hydroxyproline	4	0.281294	0.44386	1.28038e+15	1397	23	13223	1.64614	1	0.903648	99.9843
GOTERM_CC_FAT	GO:0005581~collagen	4	0.281294	0.493875	1.28074e+16	1000	23	8798	1.53009	1	0.97189	99.9947
INTERPRO	IPR008160:Collagen triple helix repeat	6	0.421941	0.568706	2.36001e+27	1250	47	11754	1.20041	1	0.999985	99.9999
SP_PIR_KEYWORDS	hydroxylysine	3	0.21097	0.610916	128073731278	1397	19	13223	1.49452	1	0.954192	99.9999
SP_PIR_KEYWORDS	triple helix	3	0.21097	0.666138	128073731278	1397	21	13223	1.35218	1	0.968088	100
Annotation Cluster 191	Enrichment Score: 0.40541873202817436
Category	Term	Count	%	PValue	Genes	List Total	Pop Hits	Pop Total	Fold Enrichment	Bonferroni	Benjamini	FDR
GOTERM_BP_FAT	GO:0007267~cell-cell signaling	44	3.09423	0.169658	6.7521e+180	1049	343	9658	1.18106	1	0.907198	96.6723
GOTERM_BP_FAT	GO:0019226~transmission of nerve impulse	23	1.61744	0.536628	9.51426e+95	1049	203	9658	1.04314	1	0.994997	99.9999
GOTERM_BP_FAT	GO:0007268~synaptic transmission	18	1.26582	0.667569	2.57194e+75	1049	169	9658	0.980613	1	0.998877	100
Annotation Cluster 192	Enrichment Score: 0.40442287355377093
Category	Term	Count	%	PValue	Genes	List Total	Pop Hits	Pop Total	Fold Enrichment	Bonferroni	Benjamini	FDR
UP_SEQ_FEATURE	repeat:ANK 4	15	1.05485	0.236043	5.50755e+72	1395	107	13210	1.3275	1	0.999996	99.277
UP_SEQ_FEATURE	repeat:ANK 2	21	1.47679	0.252339	8.85355e+104	1395	161	13210	1.23516	1	0.999997	99.5128
SP_PIR_KEYWORDS	ank repeat	21	1.47679	0.289893	8.85355e+104	1397	165	13223	1.20467	1	0.819441	99.3973
UP_SEQ_FEATURE	repeat:ANK 8	6	0.421941	0.307788	2.88229e+27	1395	35	13210	1.62335	1	0.999999	99.8812
UP_SEQ_FEATURE	repeat:ANK 1	20	1.40647	0.327971	8.85355e+100	1395	160	13210	1.18369	1	1	99.9309
UP_SEQ_FEATURE	repeat:ANK 5	12	0.843882	0.336627	2.88551e+58	1395	89	13210	1.27679	1	1	99.9455
INTERPRO	IPR002110:Ankyrin	20	1.40647	0.380641	8.85355e+99	1250	164	11754	1.14673	1	0.999784	99.9701
SMART	SM00248:ANK	20	1.40647	0.380734	8.85355e+99	692	164	6501	1.14567	1	0.965795	99.8465
UP_SEQ_FEATURE	repeat:ANK 6	9	0.632911	0.445437	2.88551e+42	1395	69	13210	1.23516	1	1	99.9979
UP_SEQ_FEATURE	repeat:ANK 3	16	1.12518	0.480745	5.50755e+78	1395	137	13210	1.10593	1	1	99.9994
UP_SEQ_FEATURE	repeat:ANK 7	6	0.421941	0.54244	2.88229e+27	1395	46	13210	1.23516	1	1	99.9999
UP_SEQ_FEATURE	repeat:ANK 10	3	0.21097	0.665885	288511301612	1395	21	13210	1.35279	1	1	100
UP_SEQ_FEATURE	repeat:ANK 9	3	0.21097	0.840354	288511301612	1395	30	13210	0.946953	1	1	100
Annotation Cluster 193	Enrichment Score: 0.40410878437826825
Category	Term	Count	%	PValue	Genes	List Total	Pop Hits	Pop Total	Fold Enrichment	Bonferroni	Benjamini	FDR
GOTERM_BP_FAT	GO:0034284~response to monosaccharide stimulus	6	0.421941	0.351505	1.06286e+23	1049	36	9658	1.53448	1	0.978773	99.9639
GOTERM_BP_FAT	GO:0009746~response to hexose stimulus	6	0.421941	0.351505	1.06286e+23	1049	36	9658	1.53448	1	0.978773	99.9639
GOTERM_BP_FAT	GO:0009743~response to carbohydrate stimulus	7	0.492264	0.382216	4.19911e+27	1049	46	9658	1.40104	1	0.983186	99.9852
GOTERM_BP_FAT	GO:0009749~response to glucose stimulus	5	0.351617	0.512145	1.06286e+19	1049	34	9658	1.35395	1	0.993996	99.9998
Annotation Cluster 194	Enrichment Score: 0.39867546275416793
Category	Term	Count	%	PValue	Genes	List Total	Pop Hits	Pop Total	Fold Enrichment	Bonferroni	Benjamini	FDR
SP_PIR_KEYWORDS	sh3-binding	8	0.562588	0.307396	5.35998e+34	1397	52	13223	1.4562	1	0.827172	99.5848
GOTERM_MF_FAT	GO:0017124~SH3 domain binding	11	0.773558	0.345006	6.47805e+47	994	79	9211	1.29029	1	0.985936	99.8906
UP_SEQ_FEATURE	short sequence motif:SH3-binding	6	0.421941	0.600413	9.84484e+27	1395	49	13210	1.15953	1	1	100
Annotation Cluster 195	Enrichment Score: 0.39607333787110793
Category	Term	Count	%	PValue	Genes	List Total	Pop Hits	Pop Total	Fold Enrichment	Bonferroni	Benjamini	FDR
GOTERM_BP_FAT	GO:0006022~aminoglycan metabolic process	8	0.562588	0.261271	2.5173e+35	1049	48	9658	1.53448	1	0.95929	99.6084
GOTERM_BP_FAT	GO:0030203~glycosaminoglycan metabolic process	7	0.492264	0.321844	2.5173e+30	1049	43	9658	1.49879	1	0.974792	99.9182
GOTERM_BP_FAT	GO:0005976~polysaccharide metabolic process	11	0.773558	0.428486	2.5173e+47	1049	84	9658	1.20566	1	0.988589	99.9964
GOTERM_BP_FAT	GO:0006029~proteoglycan metabolic process	5	0.351617	0.463354	2.99401e+23	1049	32	9658	1.43857	1	0.991325	99.9989
GOTERM_BP_FAT	GO:0030166~proteoglycan biosynthetic process	3	0.21097	0.626683	299408353955790	1049	19	9658	1.45372	1	0.998054	100
Annotation Cluster 196	Enrichment Score: 0.3933085143594865
Category	Term	Count	%	PValue	Genes	List Total	Pop Hits	Pop Total	Fold Enrichment	Bonferroni	Benjamini	FDR
GOTERM_BP_FAT	GO:0048738~cardiac muscle tissue development	7	0.492264	0.225602	7.04269e+28	1049	38	9658	1.696	1	0.944783	99.0717
GOTERM_BP_FAT	GO:0055010~ventricular cardiac muscle morphogenesis	3	0.21097	0.41995	716856296256	1049	13	9658	2.12466	1	0.987662	99.9953
GOTERM_BP_FAT	GO:0055008~cardiac muscle tissue morphogenesis	3	0.21097	0.531022	716856296256	1049	16	9658	1.72629	1	0.994841	99.9999
GOTERM_BP_FAT	GO:0060415~muscle tissue morphogenesis	3	0.21097	0.531022	716856296256	1049	16	9658	1.72629	1	0.994841	99.9999
Annotation Cluster 197	Enrichment Score: 0.3893343049555904
Category	Term	Count	%	PValue	Genes	List Total	Pop Hits	Pop Total	Fold Enrichment	Bonferroni	Benjamini	FDR
UP_SEQ_FEATURE	domain:START	3	0.21097	0.405576	108095848880765	1395	13	13210	2.18528	1	1	99.9927
INTERPRO	IPR002913:Lipid-binding START	3	0.21097	0.409131	108095848880765	1250	13	11754	2.16997	1	0.999854	99.9865
SMART	SM00234:START	3	0.21097	0.40932	108095848880765	692	13	6501	2.16796	1	0.967011	99.919
Annotation Cluster 198	Enrichment Score: 0.3877967107794548
Category	Term	Count	%	PValue	Genes	List Total	Pop Hits	Pop Total	Fold Enrichment	Bonferroni	Benjamini	FDR
GOTERM_BP_FAT	GO:0042063~gliogenesis	9	0.632911	0.156319	7.04271e+34	1049	49	9658	1.69106	1	0.897082	95.5452
GOTERM_BP_FAT	GO:0010001~glial cell differentiation	5	0.351617	0.644277	1.83293e+18	1049	40	9658	1.15086	1	0.998462	100
GOTERM_BP_FAT	GO:0021782~glial cell development	3	0.21097	0.681592	18329348890	1049	21	9658	1.31527	1	0.999061	100
Annotation Cluster 199	Enrichment Score: 0.3810309765367173
Category	Term	Count	%	PValue	Genes	List Total	Pop Hits	Pop Total	Fold Enrichment	Bonferroni	Benjamini	FDR
GOTERM_BP_FAT	GO:0030595~leukocyte chemotaxis	4	0.281294	0.402483	7.04258e+17	1049	21	9658	1.75369	1	0.985797	99.9919
GOTERM_BP_FAT	GO:0050900~leukocyte migration	5	0.351617	0.412948	7.04258e+21	1049	30	9658	1.53448	1	0.987076	99.9942
GOTERM_BP_FAT	GO:0060326~cell chemotaxis	4	0.281294	0.432777	7.04258e+17	1049	22	9658	1.67398	1	0.988917	99.9969
Annotation Cluster 200	Enrichment Score: 0.3782389049743318
Category	Term	Count	%	PValue	Genes	List Total	Pop Hits	Pop Total	Fold Enrichment	Bonferroni	Benjamini	FDR
GOTERM_BP_FAT	GO:0019748~secondary metabolic process	11	0.773558	0.174034	4.19927e+49	1049	66	9658	1.53448	1	0.910132	96.979
GOTERM_BP_FAT	GO:0006739~NADP metabolic process	4	0.281294	0.188326	4.19927e+18	1049	14	9658	2.63053	1	0.920931	97.8052
GOTERM_BP_FAT	GO:0043603~cellular amide metabolic process	8	0.562588	0.296536	4.19927e+34	1049	50	9658	1.4731	1	0.969051	99.84
GOTERM_BP_FAT	GO:0006733~oxidoreduction coenzyme metabolic process	7	0.492264	0.402427	4.19927e+32	1049	47	9658	1.37124	1	0.98593	99.9919
GOTERM_BP_FAT	GO:0046496~nicotinamide nucleotide metabolic process	5	0.351617	0.558798	4.19927e+22	1049	36	9658	1.27873	1	0.996061	100
GOTERM_BP_FAT	GO:0006769~nicotinamide metabolic process	5	0.351617	0.558798	4.19927e+22	1049	36	9658	1.27873	1	0.996061	100
GOTERM_BP_FAT	GO:0009820~alkaloid metabolic process	5	0.351617	0.581198	4.19927e+22	1049	37	9658	1.24417	1	0.996867	100
GOTERM_BP_FAT	GO:0019362~pyridine nucleotide metabolic process	5	0.351617	0.581198	4.19927e+22	1049	37	9658	1.24417	1	0.996867	100
GOTERM_BP_FAT	GO:0051186~cofactor metabolic process	19	1.33615	0.591788	4.19927e+82	1049	171	9658	1.02298	1	0.997173	100
GOTERM_BP_FAT	GO:0006732~coenzyme metabolic process	14	0.984529	0.676048	2.70352e+62	1049	131	9658	0.98394	1	0.999006	100
Annotation Cluster 201	Enrichment Score: 0.37383521779051043
Category	Term	Count	%	PValue	Genes	List Total	Pop Hits	Pop Total	Fold Enrichment	Bonferroni	Benjamini	FDR
GOTERM_CC_FAT	GO:0015630~microtubule cytoskeleton	59	4.14909	0.238371	1.12588e+263	1000	465	8798	1.11631	1	0.856854	98.0482
GOTERM_CC_FAT	GO:0005813~centrosome	24	1.68776	0.548185	1.12586e+102	1000	204	8798	1.03506	1	0.980289	99.999
GOTERM_CC_FAT	GO:0005815~microtubule organizing center	26	1.82841	0.578513	1.12583e+109	1000	225	8798	1.01666	1	0.982993	99.9996
Annotation Cluster 202	Enrichment Score: 0.3719589857784429
Category	Term	Count	%	PValue	Genes	List Total	Pop Hits	Pop Total	Fold Enrichment	Bonferroni	Benjamini	FDR
GOTERM_BP_FAT	GO:0009967~positive regulation of signal transduction	27	1.89873	0.333952	3.08721e+105	1049	218	9658	1.1403	1	0.976696	99.9412
GOTERM_BP_FAT	GO:0010647~positive regulation of cell communication	29	2.03938	0.370789	3.08721e+113	1049	240	9658	1.1125	1	0.982374	99.9792
GOTERM_BP_FAT	GO:0010740~positive regulation of protein kinase cascade	17	1.1955	0.381645	5.46022e+70	1049	134	9658	1.16803	1	0.983221	99.9849
GOTERM_BP_FAT	GO:0043123~positive regulation of I-kappaB kinase/NF-kappaB cascade	11	0.773558	0.41328	3.95611e+47	1049	83	9658	1.22019	1	0.987004	99.9942
GOTERM_BP_FAT	GO:0043122~regulation of I-kappaB kinase/NF-kappaB cascade	11	0.773558	0.518532	3.95611e+47	1049	90	9658	1.12528	1	0.994298	99.9998
GOTERM_BP_FAT	GO:0010627~regulation of protein kinase cascade	22	1.54712	0.579103	5.76308e+92	1049	198	9658	1.02298	1	0.996832	100
Annotation Cluster 203	Enrichment Score: 0.3678023470456118
Category	Term	Count	%	PValue	Genes	List Total	Pop Hits	Pop Total	Fold Enrichment	Bonferroni	Benjamini	FDR
INTERPRO	IPR013098:Immunoglobulin I-set	13	0.914205	0.120783	1.61357e+62	1250	78	11754	1.5672	1	0.985008	88.7007
SMART	SM00408:IGc2	16	1.12518	0.206873	161357,219699,23022,57633,6091,6092,3339,634,57549,2264,7301,9543,1,115701,253012,23363	692	112	6501	1.34207	1	0.890151	95.6435
INTERPRO	IPR003598:Immunoglobulin subtype 2	16	1.12518	0.207357	161357,219699,23022,57633,6091,6092,3339,634,57549,2264,7301,9543,1,115701,253012,23363	1250	112	11754	1.34331	1	0.997118	98.0479
SP_PIR_KEYWORDS	Immunoglobulin domain	30	2.1097	0.246605	219699,10205,57633,64115,965,9244,3339,3386,7301,4277,253012,5797,1462,10461,161357,23022,91624,11118,6091,6092,634,2264,57549,9543,10512,1,115701,567,120425,5817	1397	240	13223	1.18316	1	0.773347	98.5417
INTERPRO	IPR007110:Immunoglobulin-like	28	1.96906	0.328724	219699,10205,57633,64115,3339,7301,4277,253012,5797,1462,10461,161357,23022,91624,11118,6091,6092,634,57549,2264,9543,10512,1,115701,23363,567,5817,120425	1250	231	11754	1.13978	1	0.999516	99.8831
INTERPRO	IPR013783:Immunoglobulin-like fold	31	2.18003	0.351711	10205,219699,57633,64115,965,3339,3386,7301,4277,253012,5797,1462,10461,23321,161357,23022,91624,6091,11118,6092,634,2264,57549,9543,10512,1,115701,23363,567,120425,5817	1250	261	11754	1.11686	1	0.999649	99.9352
INTERPRO	IPR013106:Immunoglobulin V-set	12	0.843882	0.457551	1.02053e+55	1250	97	11754	1.16328	1	0.999934	99.9968
UP_SEQ_FEATURE	domain:Ig-like C2-type 1	12	0.843882	0.570456	2.30223e+50	1395	106	13210	1.07202	1	1	100
UP_SEQ_FEATURE	domain:Ig-like C2-type 2	12	0.843882	0.570456	2.30223e+50	1395	106	13210	1.07202	1	1	100
INTERPRO	IPR013151:Immunoglobulin	13	0.914205	0.571739	161357,3339,634,57549,2264,7301,9543,1,253012,23363,5797,5817,10461	1250	115	11754	1.06297	1	0.999986	99.9999
UP_SEQ_FEATURE	domain:Ig-like C2-type 5	4	0.281294	0.6916	2.30226e+16	1395	33	13210	1.14782	1	1	100
UP_SEQ_FEATURE	domain:Ig-like C2-type 4	5	0.351617	0.713428	2.30226e+20	1395	45	13210	1.05217	1	1	100
INTERPRO	IPR003599:Immunoglobulin subtype	16	1.12518	0.783653	1.61358e+76	1250	166	11754	0.906333	1	1	100
SMART	SM00409:IG	16	1.12518	0.785501	1.61358e+76	692	166	6501	0.905495	1	0.997544	100
UP_SEQ_FEATURE	domain:Ig-like C2-type 3	7	0.492264	0.796083	2.30226e+27	1395	73	13210	0.908038	1	1	100
Annotation Cluster 204	Enrichment Score: 0.3611836494950279
Category	Term	Count	%	PValue	Genes	List Total	Pop Hits	Pop Total	Fold Enrichment	Bonferroni	Benjamini	FDR
GOTERM_BP_FAT	GO:0006939~smooth muscle contraction	5	0.351617	0.187282	6.75218e+19	1049	21	9658	2.19211	1	0.921099	97.7529
GOTERM_BP_FAT	GO:0006936~muscle contraction	11	0.773558	0.533159	4.44675e+43	1049	91	9658	1.11292	1	0.99495	99.9999
GOTERM_BP_FAT	GO:0003012~muscle system process	12	0.843882	0.556202	4.44675e+47	1049	102	9658	1.08316	1	0.996031	100
GOTERM_BP_FAT	GO:0006941~striated muscle contraction	4	0.281294	0.646666	6.19872e+15	1049	30	9658	1.22758	1	0.998473	100
Annotation Cluster 205	Enrichment Score: 0.35802376447631445
Category	Term	Count	%	PValue	Genes	List Total	Pop Hits	Pop Total	Fold Enrichment	Bonferroni	Benjamini	FDR
GOTERM_CC_FAT	GO:0031300~intrinsic to organelle membrane	19	1.33615	0.238136	2.32925e+83	1000	132	8798	1.26638	1	0.860409	98.0394
GOTERM_CC_FAT	GO:0030173~integral to Golgi membrane	7	0.492264	0.238424	5.71341e+31	1000	37	8798	1.66449	1	0.853062	98.0501
GOTERM_CC_FAT	GO:0031228~intrinsic to Golgi membrane	7	0.492264	0.298905	5.71341e+31	1000	40	8798	1.53965	1	0.900786	99.4105
SP_PIR_KEYWORDS	glycosyltransferase	19	1.33615	0.478722	5.46251e+85	1397	165	13223	1.08994	1	0.921992	99.994
GOTERM_BP_FAT	GO:0009101~glycoprotein biosynthetic process	15	1.05485	0.479966	2.99408e+68	1049	124	9658	1.11373	1	0.992404	99.9994
GOTERM_BP_FAT	GO:0009100~glycoprotein metabolic process	19	1.33615	0.484025	2.62323e+86	1049	161	9658	1.08652	1	0.99245	99.9995
GOTERM_BP_FAT	GO:0043413~biopolymer glycosylation	12	0.843882	0.542504	5.71345e+53	1049	101	9658	1.09388	1	0.99532	99.9999
GOTERM_BP_FAT	GO:0006486~protein amino acid glycosylation	12	0.843882	0.542504	5.71345e+53	1049	101	9658	1.09388	1	0.99532	99.9999
GOTERM_BP_FAT	GO:0070085~glycosylation	12	0.843882	0.542504	5.71345e+53	1049	101	9658	1.09388	1	0.99532	99.9999
GOTERM_CC_FAT	GO:0031301~integral to organelle membrane	13	0.914205	0.617029	2.53982e+57	1000	111	8798	1.0304	1	0.9868	99.9999
GOTERM_CC_FAT	GO:0000139~Golgi membrane	19	1.33615	0.619948	1.0679e+79	1000	166	8798	1.007	1	0.986251	99.9999
Annotation Cluster 206	Enrichment Score: 0.35678760095359136
Category	Term	Count	%	PValue	Genes	List Total	Pop Hits	Pop Total	Fold Enrichment	Bonferroni	Benjamini	FDR
GOTERM_BP_FAT	GO:0019884~antigen processing and presentation of exogenous antigen	4	0.281294	0.160151	1.04372e+15	1049	13	9658	2.83288	1	0.90142	95.9013
GOTERM_BP_FAT	GO:0002478~antigen processing and presentation of exogenous peptide antigen	3	0.21097	0.296984	104371510567	1049	10	9658	2.76206	1	0.968634	99.8419
GOTERM_BP_FAT	GO:0019882~antigen processing and presentation	5	0.351617	0.644277	1.04374e+19	1049	40	9658	1.15086	1	0.998462	100
GOTERM_BP_FAT	GO:0048002~antigen processing and presentation of peptide antigen	3	0.21097	0.72971	104371510567	1049	23	9658	1.2009	1	0.999529	100
KEGG_PATHWAY	hsa04612:Antigen processing and presentation	6	0.421941	0.73549	1.04373e+23	436	50	3618	0.99578	1	0.978089	100
Annotation Cluster 207	Enrichment Score: 0.35389818890025126
Category	Term	Count	%	PValue	Genes	List Total	Pop Hits	Pop Total	Fold Enrichment	Bonferroni	Benjamini	FDR
PIR_SUPERFAMILY	PIRSF001392:carbonate dehydratase	3	0.21097	0.283659	763377677762	589	9	5036	2.85003	1	1	99.2979
INTERPRO	IPR018338:Carbonic anhydrase, alpha-class, conserved site	3	0.21097	0.28822	763377677762	1250	10	11754	2.82096	1	0.999201	99.6846
KEGG_PATHWAY	hsa00910:Nitrogen metabolism	4	0.281294	0.370276	7.63303e+15	436	18	3618	1.84404	1	0.938595	99.666
GOTERM_MF_FAT	GO:0004089~carbonate dehydratase activity	3	0.21097	0.376776	763377677762	994	12	9211	2.31665	1	0.988824	99.9509
INTERPRO	IPR001148:Carbonic anhydrase, alpha-class, catalytic domain	3	0.21097	0.409131	763377677762	1250	13	11754	2.16997	1	0.999854	99.9865
GOTERM_MF_FAT	GO:0016836~hydro-lyase activity	4	0.281294	0.777376	7.63378e+15	994	37	9211	1.00179	1	0.999893	100
GOTERM_BP_FAT	GO:0006730~one-carbon metabolic process	8	0.562588	0.918519	7.63117e+32	1049	98	9658	0.751581	1	0.999995	100
Annotation Cluster 208	Enrichment Score: 0.34736552760217854
Category	Term	Count	%	PValue	Genes	List Total	Pop Hits	Pop Total	Fold Enrichment	Bonferroni	Benjamini	FDR
GOTERM_BP_FAT	GO:0010324~membrane invagination	23	1.61744	0.271736	1.60123e+101	1049	176	9658	1.20317	1	0.963188	99.6984
GOTERM_BP_FAT	GO:0006897~endocytosis	23	1.61744	0.271736	1.60123e+101	1049	176	9658	1.20317	1	0.963188	99.6984
GOTERM_BP_FAT	GO:0016044~membrane organization	35	2.46132	0.525188	1.6011e+151	1049	313	9658	1.02952	1	0.994608	99.9999
SP_PIR_KEYWORDS	Endocytosis	9	0.632911	0.632826	4.32549e+41	1397	81	13223	1.0517	1	0.960838	100
GOTERM_BP_FAT	GO:0016192~vesicle-mediated transport	49	3.44585	0.746929	9.3821e+220	1049	479	9658	0.941829	1	0.999657	100
Annotation Cluster 209	Enrichment Score: 0.34731987565568295
Category	Term	Count	%	PValue	Genes	List Total	Pop Hits	Pop Total	Fold Enrichment	Bonferroni	Benjamini	FDR
GOTERM_BP_FAT	GO:0048706~embryonic skeletal system development	10	0.703235	0.255004	3.21913e+41	1049	64	9658	1.43857	1	0.958399	99.5429
GOTERM_BP_FAT	GO:0051216~cartilage development	8	0.562588	0.351085	1.28027e+29	1049	53	9658	1.38972	1	0.97886	99.9635
GOTERM_BP_FAT	GO:0002062~chondrocyte differentiation	3	0.21097	0.458554	128026733339	1049	14	9658	1.9729	1	0.991277	99.9987
GOTERM_BP_FAT	GO:0048704~embryonic skeletal system morphogenesis	6	0.421941	0.52754	1.28032e+25	1049	44	9658	1.25548	1	0.994737	99.9999
GOTERM_BP_FAT	GO:0048705~skeletal system morphogenesis	8	0.562588	0.846831	1.28032e+33	1049	87	9658	0.846608	1	0.999944	100
Annotation Cluster 210	Enrichment Score: 0.346587477003222
Category	Term	Count	%	PValue	Genes	List Total	Pop Hits	Pop Total	Fold Enrichment	Bonferroni	Benjamini	FDR
GOTERM_BP_FAT	GO:0051222~positive regulation of protein transport	8	0.562588	0.164734	7.04255e+29	1049	42	9658	1.75369	1	0.904132	96.2919
GOTERM_BP_FAT	GO:0032880~regulation of protein localization	16	1.12518	0.171638	1.04603e+63	1049	106	9658	1.38972	1	0.908392	96.8145
GOTERM_BP_FAT	GO:0051223~regulation of protein transport	13	0.914205	0.196292	1.04606e+51	1049	84	9658	1.42487	1	0.926591	98.1677
GOTERM_BP_FAT	GO:0070201~regulation of establishment of protein localization	13	0.914205	0.280775	1.04606e+51	1049	91	9658	1.31527	1	0.964631	99.76
GOTERM_BP_FAT	GO:0032388~positive regulation of intracellular transport	4	0.281294	0.491498	550755566652999	1049	24	9658	1.53448	1	0.992781	99.9996
GOTERM_BP_FAT	GO:0033157~regulation of intracellular protein transport	6	0.421941	0.548231	1.04604e+23	1049	45	9658	1.22758	1	0.995614	100
GOTERM_BP_FAT	GO:0046824~positive regulation of nucleocytoplasmic transport	3	0.21097	0.56469	550755566999	1049	17	9658	1.62474	1	0.996284	100
GOTERM_BP_FAT	GO:0042990~regulation of transcription factor import into nucleus	3	0.21097	0.72971	1046055075999	1049	23	9658	1.2009	1	0.999529	100
GOTERM_BP_FAT	GO:0042306~regulation of protein import into nucleus	4	0.281294	0.765051	1.04606e+15	1049	36	9658	1.02298	1	0.999751	100
GOTERM_BP_FAT	GO:0032386~regulation of intracellular transport	6	0.421941	0.781926	1.04604e+23	1049	59	9658	0.936291	1	0.999813	100
GOTERM_BP_FAT	GO:0046822~regulation of nucleocytoplasmic transport	5	0.351617	0.806572	1.04606e+19	1049	50	9658	0.920686	1	0.999882	100
GOTERM_BP_FAT	GO:0060341~regulation of cellular localization	16	1.12518	0.830518	1.04606e+64	1049	169	9658	0.871656	1	0.999922	100
Annotation Cluster 211	Enrichment Score: 0.34157946133055567
Category	Term	Count	%	PValue	Genes	List Total	Pop Hits	Pop Total	Fold Enrichment	Bonferroni	Benjamini	FDR
GOTERM_MF_FAT	GO:0004713~protein tyrosine kinase activity	18	1.26582	0.205389	1.57285e+75	994	127	9211	1.31338	1	0.94952	97.5391
SP_PIR_KEYWORDS	tyrosine-protein kinase	12	0.843882	0.244851	1.57285e+50	1397	82	13223	1.38516	1	0.773297	98.4902
GOTERM_MF_FAT	GO:0004714~transmembrane receptor protein tyrosine kinase activity	7	0.492264	0.436271	8.82936e+28	994	49	9211	1.3238	1	0.993513	99.9903
INTERPRO	IPR008266:Tyrosine protein kinase, active site	8	0.562588	0.593841	1.57285e+34	1250	68	11754	1.10626	1	0.999989	100
SP_PIR_KEYWORDS	tyrosine-specific protein kinase	4	0.281294	0.671349	364322647802242	1397	32	13223	1.18316	1	0.969112	100
INTERPRO	IPR001245:Tyrosine protein kinase	9	0.632911	0.681139	8.44511e+37	1250	84	11754	1.00749	1	0.999998	100
SMART	SM00219:TyrKc	9	0.632911	0.682111	8.44511e+37	692	84	6501	1.00655	1	0.993381	100
Annotation Cluster 212	Enrichment Score: 0.34104617772072415
Category	Term	Count	%	PValue	Genes	List Total	Pop Hits	Pop Total	Fold Enrichment	Bonferroni	Benjamini	FDR
GOTERM_BP_FAT	GO:0060284~regulation of cell development	24	1.68776	0.102336	8.02794e+99	1049	161	9658	1.37245	1	0.821362	86.1377
GOTERM_BP_FAT	GO:0051960~regulation of nervous system development	21	1.47679	0.178055	8.02794e+88	1049	148	9658	1.30638	1	0.911693	97.2371
GOTERM_BP_FAT	GO:0050767~regulation of neurogenesis	18	1.26582	0.242248	8.02794e+74	1049	130	9658	1.2748	1	0.953245	99.3763
GOTERM_BP_FAT	GO:0050770~regulation of axonogenesis	7	0.492264	0.402427	1.50466e+28	1049	47	9658	1.37124	1	0.98593	99.9919
GOTERM_BP_FAT	GO:0045664~regulation of neuron differentiation	13	0.914205	0.429188	8.02794e+56	1049	102	9658	1.17342	1	0.988466	99.9965
GOTERM_BP_FAT	GO:0010720~positive regulation of cell development	8	0.562588	0.497956	7.04261e+29	1049	61	9658	1.20746	1	0.993143	99.9997
GOTERM_BP_FAT	GO:0010769~regulation of cell morphogenesis involved in differentiation	8	0.562588	0.533342	1.50466e+32	1049	63	9658	1.16913	1	0.99491	99.9999
GOTERM_BP_FAT	GO:0010975~regulation of neuron projection development	7	0.492264	0.576892	1.50466e+28	1049	56	9658	1.15086	1	0.996756	100
GOTERM_BP_FAT	GO:0031344~regulation of cell projection organization	8	0.562588	0.705381	1.50465e+32	1049	74	9658	0.995337	1	0.999335	100
GOTERM_BP_FAT	GO:0050772~positive regulation of axonogenesis	3	0.21097	0.706474	60916092396	1049	22	9658	1.25548	1	0.999341	100
GOTERM_BP_FAT	GO:0022604~regulation of cell morphogenesis	10	0.703235	0.834468	5.57852e+42	1049	107	9658	0.860455	1	0.999929	100
GOTERM_BP_FAT	GO:0031346~positive regulation of cell projection organization	4	0.281294	0.860136	367360916092396	1049	43	9658	0.856452	1	0.999959	100
GOTERM_CC_FAT	GO:0033267~axon part	3	0.21097	0.881933	367360916092	1000	31	8798	0.851419	1	0.998764	100
Annotation Cluster 213	Enrichment Score: 0.3290832470518443
Category	Term	Count	%	PValue	Genes	List Total	Pop Hits	Pop Total	Fold Enrichment	Bonferroni	Benjamini	FDR
INTERPRO	IPR011511:Variant SH3	7	0.492264	0.343301	2.71342e+32	1250	45	11754	1.46272	1	0.99959	99.9194
INTERPRO	IPR008145:Guanylate kinase/L-type calcium channel region	4	0.281294	0.418908	2.71348e+16	1250	22	11754	1.70967	1	0.999879	99.9898
SMART	SM00072:GuKc	4	0.281294	0.41914	2.71348e+16	692	22	6501	1.70809	1	0.968293	99.9354
UP_SEQ_FEATURE	domain:Guanylate kinase-like	3	0.21097	0.610659	27134857351678	1395	19	13210	1.49519	1	1	100
INTERPRO	IPR008144:Guanylate kinase	3	0.21097	0.614656	27134857351678	1250	19	11754	1.48472	1	0.999991	100
Annotation Cluster 214	Enrichment Score: 0.3251434488291777
Category	Term	Count	%	PValue	Genes	List Total	Pop Hits	Pop Total	Fold Enrichment	Bonferroni	Benjamini	FDR
GOTERM_MF_FAT	GO:0016706~oxidoreductase activity, acting on paired donors, with incorporation or reduction of molecular oxygen, 2-oxoglutarate as one donor, and incorporation of one atom each of oxygen into both donors	5	0.351617	0.280498	4.44254e+23	994	25	9211	1.85332	1	0.972582	99.5032
SP_PIR_KEYWORDS	dioxygenase	7	0.492264	0.548735	4.44254e+33	1397	56	13223	1.18316	1	0.940766	99.9993
GOTERM_MF_FAT	GO:0016702~oxidoreductase activity, acting on single donors with incorporation of molecular oxygen, incorporation of two atoms of oxygen	7	0.492264	0.570252	4.44254e+33	994	56	9211	1.15832	1	0.998067	99.9999
GOTERM_MF_FAT	GO:0016701~oxidoreductase activity, acting on single donors with incorporation of molecular oxygen	7	0.492264	0.570252	4.44254e+33	994	56	9211	1.15832	1	0.998067	99.9999
Annotation Cluster 215	Enrichment Score: 0.3247230257775299
Category	Term	Count	%	PValue	Genes	List Total	Pop Hits	Pop Total	Fold Enrichment	Bonferroni	Benjamini	FDR
GOTERM_BP_FAT	GO:0031145~anaphase-promoting complex-dependent proteasomal ubiquitin-dependent protein catabolic process	9	0.632911	0.258435	9.96111e+33	1049	56	9658	1.47967	1	0.959225	99.5799
GOTERM_BP_FAT	GO:0043161~proteasomal ubiquitin-dependent protein catabolic process	13	0.914205	0.280775	2.62321e+51	1049	91	9658	1.31527	1	0.964631	99.76
GOTERM_BP_FAT	GO:0010498~proteasomal protein catabolic process	13	0.914205	0.280775	2.62321e+51	1049	91	9658	1.31527	1	0.964631	99.76
GOTERM_BP_FAT	GO:0032269~negative regulation of cellular protein metabolic process	20	1.40647	0.331728	11065,5104,5705,5720,857,283,1789,996,2,3685,9775,8890,10642,991,7076,701,3643,710,29945,5699	1049	156	9658	1.18037	1	0.976676	99.9375
GOTERM_BP_FAT	GO:0051439~regulation of ubiquitin-protein ligase activity during mitotic cell cycle	9	0.632911	0.358036	9.96111e+33	1049	62	9658	1.33648	1	0.979811	99.97
GOTERM_BP_FAT	GO:0051248~negative regulation of protein metabolic process	20	1.40647	0.374039	11065,5104,5705,5720,857,283,1789,996,2,3685,9775,8890,10642,991,7076,701,3643,710,29945,5699	1049	160	9658	1.15086	1	0.982455	99.9811
GOTERM_BP_FAT	GO:0051436~negative regulation of ubiquitin-protein ligase activity during mitotic cell cycle	8	0.562588	0.406539	9.96111e+30	1049	56	9658	1.31527	1	0.986298	99.9929
GOTERM_BP_FAT	GO:0051352~negative regulation of ligase activity	8	0.562588	0.443447	9.96111e+30	1049	58	9658	1.26991	1	0.98985	99.9978
GOTERM_BP_FAT	GO:0051444~negative regulation of ubiquitin-protein ligase activity	8	0.562588	0.443447	9.96111e+30	1049	58	9658	1.26991	1	0.98985	99.9978
GOTERM_BP_FAT	GO:0031396~regulation of protein ubiquitination	11	0.773558	0.458809	9.96262e+43	1049	86	9658	1.17762	1	0.991217	99.9987
GOTERM_BP_FAT	GO:0051437~positive regulation of ubiquitin-protein ligase activity during mitotic cell cycle	8	0.562588	0.461765	9.96111e+30	1049	59	9658	1.24839	1	0.99149	99.9988
GOTERM_BP_FAT	GO:0043085~positive regulation of catalytic activity	43	3.02391	0.476749	8.44511e+169	1049	382	9658	1.03637	1	0.992372	99.9993
GOTERM_BP_FAT	GO:0051438~regulation of ubiquitin-protein ligase activity	9	0.632911	0.477772	9.96111e+33	1049	69	9658	1.2009	1	0.992404	99.9993
GOTERM_BP_FAT	GO:0032270~positive regulation of cellular protein metabolic process	22	1.54712	0.478666	3.67321e+82	1049	188	9658	1.0774	1	0.992421	99.9993
GOTERM_BP_FAT	GO:0031399~regulation of protein modification process	27	1.89873	0.480227	8.44512e+107	1049	234	9658	1.06233	1	0.992353	99.9994
GOTERM_BP_FAT	GO:0051443~positive regulation of ubiquitin-protein ligase activity	8	0.562588	0.497956	9.96111e+30	1049	61	9658	1.20746	1	0.993143	99.9997
GOTERM_BP_FAT	GO:0031398~positive regulation of protein ubiquitination	9	0.632911	0.511235	9.96546e+35	1049	71	9658	1.16707	1	0.993979	99.9998
GOTERM_BP_FAT	GO:0051340~regulation of ligase activity	9	0.632911	0.527704	9.96111e+33	1049	72	9658	1.15086	1	0.994694	99.9999
GOTERM_BP_FAT	GO:0031401~positive regulation of protein modification process	17	1.1955	0.534561	2.14711e+62	1049	147	9658	1.06474	1	0.994948	99.9999
GOTERM_BP_FAT	GO:0051351~positive regulation of ligase activity	8	0.562588	0.550662	9.96111e+30	1049	64	9658	1.15086	1	0.995727	100
GOTERM_BP_FAT	GO:0031397~negative regulation of protein ubiquitination	8	0.562588	0.550662	9.96111e+30	1049	64	9658	1.15086	1	0.995727	100
GOTERM_BP_FAT	GO:0051247~positive regulation of protein metabolic process	22	1.54712	0.579103	3.67321e+82	1049	198	9658	1.02298	1	0.996832	100
GOTERM_BP_FAT	GO:0032268~regulation of cellular protein metabolic process	42	2.95359	0.618637	84451,2147,440193,5104,5577,1950,283,27250,1789,9775,8890,701,10062,5699,26232,9939,3673,5154,54602,11065,5705,652,5720,650,857,8754,975,1906,996,3685,2,183,185,991,10642,2161,55704,7076,891,3643,710,29945	1049	391	9658	0.988973	1	0.997918	100
GOTERM_BP_FAT	GO:0031400~negative regulation of protein modification process	11	0.773558	0.668619	9.96111e+41	1049	101	9658	1.00273	1	0.998885	100
GOTERM_BP_FAT	GO:0006511~ubiquitin-dependent protein catabolic process	18	1.26582	0.904008	2.62321e+77	1049	204	9658	0.81237	1	0.99999	100
KEGG_PATHWAY	hsa03050:Proteasome	3	0.21097	0.953168	570557205699	436	38	3618	0.655118	1	0.996885	100
Annotation Cluster 216	Enrichment Score: 0.321610496536393
Category	Term	Count	%	PValue	Genes	List Total	Pop Hits	Pop Total	Fold Enrichment	Bonferroni	Benjamini	FDR
GOTERM_BP_FAT	GO:0030500~regulation of bone mineralization	5	0.351617	0.23471	5.61727e+16	1049	23	9658	2.00149	1	0.950753	99.2524
GOTERM_BP_FAT	GO:0070167~regulation of biomineral formation	5	0.351617	0.259415	5.61727e+16	1049	24	9658	1.9181	1	0.959399	99.59
GOTERM_BP_FAT	GO:0001649~osteoblast differentiation	6	0.421941	0.351505	4.09065e+22	1049	36	9658	1.53448	1	0.978773	99.9639
GOTERM_BP_FAT	GO:0030278~regulation of ossification	8	0.562588	0.479946	7.04256e+28	1049	60	9658	1.22758	1	0.992481	99.9994
GOTERM_BP_FAT	GO:0030509~BMP signaling pathway	5	0.351617	0.535766	1.11674e+19	1049	35	9658	1.31527	1	0.994986	99.9999
GOTERM_BP_FAT	GO:0045669~positive regulation of osteoblast differentiation	3	0.21097	0.706474	4090652650	1049	22	9658	1.25548	1	0.999341	100
BIOCARTA	h_alkPathway:ALK in cardiac myocytes	4	0.281294	0.759052	48794090652650	148	30	1152	1.03784	1	0.999958	100
GOTERM_BP_FAT	GO:0045667~regulation of osteoblast differentiation	3	0.21097	0.905988	4090652650	1049	35	9658	0.78916	1	0.999991	100
Annotation Cluster 217	Enrichment Score: 0.3154194054094592
Category	Term	Count	%	PValue	Genes	List Total	Pop Hits	Pop Total	Fold Enrichment	Bonferroni	Benjamini	FDR
UP_SEQ_FEATURE	domain:RGS	4	0.281294	0.443558	8.38916e+18	1395	23	13210	1.64688	1	1	99.9978
INTERPRO	IPR000342:Regulator of G protein signalling	4	0.281294	0.504961	8.38916e+18	1250	25	11754	1.50451	1	0.999961	99.9993
SMART	SM00315:RGS	4	0.281294	0.505281	8.38916e+18	692	25	6501	1.50312	1	0.979032	99.9926
Annotation Cluster 218	Enrichment Score: 0.3119526647489841
Category	Term	Count	%	PValue	Genes	List Total	Pop Hits	Pop Total	Fold Enrichment	Bonferroni	Benjamini	FDR
GOTERM_BP_FAT	GO:0032103~positive regulation of response to external stimulus	7	0.492264	0.382216	3.67372e+24	1049	46	9658	1.40104	1	0.983186	99.9852
GOTERM_BP_FAT	GO:0050729~positive regulation of inflammatory response	4	0.281294	0.432777	3673718183185	1049	22	9658	1.67398	1	0.988917	99.9969
GOTERM_BP_FAT	GO:0031349~positive regulation of defense response	5	0.351617	0.700759	3.67372e+16	1049	43	9658	1.07057	1	0.999288	100
Annotation Cluster 219	Enrichment Score: 0.3087717735564434
Category	Term	Count	%	PValue	Genes	List Total	Pop Hits	Pop Total	Fold Enrichment	Bonferroni	Benjamini	FDR
KEGG_PATHWAY	hsa00830:Retinol metabolism	10	0.703235	0.0194244	5.95916e+39	436	35	3618	2.3709	0.971287	0.693785	21.4816
SP_PIR_KEYWORDS	Monooxygenase	9	0.632911	0.191767	2.32951e+37	1397	53	13223	1.60731	1	0.722344	95.8368
GOTERM_BP_FAT	GO:0042743~hydrogen peroxide metabolic process	4	0.281294	0.309563	2.70352e+15	1049	18	9658	2.04597	1	0.971533	99.8864
COG_ONTOLOGY	Secondary metabolites biosynthesis, transport, and catabolism	6	0.421941	0.3809	1.55916e+25	144	44	1554	1.47159	1	0.939008	98.5695
SP_PIR_KEYWORDS	chromoprotein	5	0.351617	0.465798	3.16156e+17	1397	33	13223	1.43413	1	0.915409	99.9914
PIR_SUPERFAMILY	PIRSF000045:cytochrome P450 CYP2D6	3	0.21097	0.573063	1559154356603	589	16	5036	1.60314	1	1	99.9997
UP_SEQ_FEATURE	metal ion-binding site:Iron (heme axial ligand)	8	0.562588	0.586146	2.70353e+33	1395	68	13210	1.11406	1	1	100
GOTERM_MF_FAT	GO:0016712~oxidoreductase activity, acting on paired donors, with incorporation or reduction of molecular oxygen, reduced flavin or flavoprotein as one donor, and incorporation of one atom of oxygen	3	0.21097	0.677966	155915771543	994	21	9211	1.3238	1	0.999461	100
SP_PIR_KEYWORDS	electron transfer	4	0.281294	0.691905	1.55916e+15	1397	33	13223	1.14731	1	0.972942	100
GOTERM_MF_FAT	GO:0046906~tetrapyrrole binding	9	0.632911	0.710007	5.08655e+36	994	85	9211	0.981169	1	0.999648	100
INTERPRO	IPR017973:Cytochrome P450, C-terminal region	4	0.281294	0.734334	1.55916e+16	1250	35	11754	1.07465	1	0.999999	100
INTERPRO	IPR017972:Cytochrome P450, conserved site	4	0.281294	0.798936	1.55916e+16	1250	39	11754	0.964431	1	1	100
INTERPRO	IPR001128:Cytochrome P450	4	0.281294	0.798936	1.55916e+16	1250	39	11754	0.964431	1	1	100
GOTERM_MF_FAT	GO:0019825~oxygen binding	3	0.21097	0.820688	155915771543	994	28	9211	0.99285	1	0.999959	100
INTERPRO	IPR002401:Cytochrome P450, E-class, group I	3	0.21097	0.856374	155915771543	1250	31	11754	0.909987	1	1	100
SP_PIR_KEYWORDS	heme	7	0.492264	0.861567	2.70352e+28	1397	80	13223	0.828212	1	0.994387	100
GOTERM_MF_FAT	GO:0020037~heme binding	7	0.492264	0.867417	5.08652e+28	994	79	9211	0.821091	1	0.999988	100
Annotation Cluster 220	Enrichment Score: 0.2987078979931157
Category	Term	Count	%	PValue	Genes	List Total	Pop Hits	Pop Total	Fold Enrichment	Bonferroni	Benjamini	FDR
GOTERM_BP_FAT	GO:0051222~positive regulation of protein transport	8	0.562588	0.164734	7.04255e+29	1049	42	9658	1.75369	1	0.904132	96.2919
GOTERM_BP_FAT	GO:0050714~positive regulation of protein secretion	3	0.21097	0.65501	70428754283	1049	20	9658	1.38103	1	0.998653	100
GOTERM_BP_FAT	GO:0050708~regulation of protein secretion	4	0.281294	0.690262	704287541950283	1049	32	9658	1.15086	1	0.999186	100
GOTERM_BP_FAT	GO:0051047~positive regulation of secretion	6	0.421941	0.857281	7.04285e+23	1049	66	9658	0.836988	1	0.999955	100
Annotation Cluster 221	Enrichment Score: 0.2985413392873001
[truncated: 1,372 more rows]

## Sheet: Huh-7.5.1 to R2.1
Annotation Cluster 1	Enrichment Score: 6.341050579382363
Category	Term	Count	%	PValue	Genes	List Total	Pop Hits	Pop Total	Fold Enrichment	Bonferroni	Benjamini	FDR
SMART	SM00389:HOX	64	2.13689	1.88834e-10	3.11031e+268	1408	138	6501	2.1413	7.68555e-08	7.68555e-08	2.64052e-07
SP_PIR_KEYWORDS	Homeobox	65	2.17028	9.7628e-10	3.11031e+272	2957	141	13223	2.06145	7.94692e-07	1.98673e-07	1.50201e-06
INTERPRO	IPR001356:Homeobox	64	2.13689	1.56623e-09	3.11031e+268	2659	138	11754	2.05007	4.48724e-06	4.48724e-06	2.80581e-06
INTERPRO	IPR017970:Homeobox, conserved site	64	2.13689	1.56623e-09	3.11031e+268	2659	138	11754	2.05007	4.48724e-06	4.48724e-06	2.80581e-06
UP_SEQ_FEATURE	DNA-binding region:Homeobox	54	1.80301	2.01567e-09	3.11031e+223	2956	110	13210	2.19381	1.27692e-05	1.27692e-05	3.93149e-06
INTERPRO	IPR012287:Homeodomain-related	60	2.00334	1.65063e-06	3.11031e+248	2659	148	11754	1.79208	0.00471789	0.00236173	0.00295696
GOTERM_BP_FAT	GO:0007389~pattern specification process	74	2.47078	1.32337e-05	3110,4041,221833,3087,7704,4853,9241,1045,10194,2648,6928,3198,2294,7852,3237,2290,3236,3239,7545,6493,2018,3202,3203,2019,7547,3204,56998,3205,9355,3206,3207,5649,1906,10370,3549,8829,29880,23314,5125,3218,3219,3216,54880,3217,55212,51715,3212,1745,3213,5664,1746,8092,5080,79068,57619,5308,10468,3221,7048,23322,3170,7044,93,2926,3226,90,655,2737,9839,7050,10023,2138,11127,4281	2208	203	9658	1.5945	0.0602664	0.00619661	0.0250157
GOTERM_MF_FAT	GO:0043565~sequence-specific DNA binding	127	4.2404	0.000565036	7494,3087,6772,6873,7490,3727,2295,2296,1628,2297,4821,4929,2294,7068,79603,2290,604,1482,4488,2018,3202,3203,2019,3204,3205,3206,9355,3207,22882,3209,3298,79618,1810,2020,3142,91464,23314,4609,5454,3218,3219,3216,3217,2625,7227,3212,3213,2627,91012,2077,1997,57616,6474,3221,4783,1999,4780,63876,10736,3131,9421,5629,3226,4436,4437,9183,5813,7050,60468,3231,79776,283078,2000,4149,3110,1045,10194,1…	2124	422	9211	1.3051	0.618937	0.214314	0.94924
GOTERM_BP_FAT	GO:0003002~regionalization	50	1.66945	0.00475277	3110,4041,3087,221833,7704,9241,10194,2648,6928,3198,3237,3236,2290,3239,3202,2018,3203,2019,3204,7547,3205,56998,3206,9355,3207,5649,1906,5125,3218,3219,3216,3217,51715,1745,3212,3213,5664,1746,8092,5080,3221,23322,3170,93,3226,2926,2737,9839,7050,11127	2208	152	9658	1.43885	1	0.211839	8.613
GOTERM_BP_FAT	GO:0009952~anterior/posterior pattern formation	38	1.26878	0.007267	3218,3219,3216,4041,3217,3087,7704,3212,3213,5664,8092,10194,5080,2648,6928,3198,3221,3237,3236,3239,3170,3202,2018,3203,2019,3204,7547,56998,3205,93,3206,3207,3226,2926,2737,9839,11127,5125	2208	111	9658	1.49744	1	0.276161	12.8803
Annotation Cluster 2	Enrichment Score: 4.966272617094414
Category	Term	Count	%	PValue	Genes	List Total	Pop Hits	Pop Total	Fold Enrichment	Bonferroni	Benjamini	FDR
GOTERM_BP_FAT	GO:0048598~embryonic morphogenesis	93	3.10518	8.67267e-08	154796,5950,7291,4041,221833,7704,4853,9241,2254,10194,10395,7020,2296,6927,7358,3198,8323,2673,23405,2294,3237,2290,3236,3239,2201,7545,4488,1280,3202,3203,7546,2019,3714,3204,3205,3206,2122,3207,9353,3209,7976,22943,7408,1906,64327,4646,4221,3142,23314,4609,25831,6934,5754,3218,2132,3216,3217,51715,3212,3213,5664,1746,1749,8092,8613,7474,9027,7041,79068,57619,7424,3221,7048,23322,3170,10736,942…	2208	244	9658	1.66718	0.000407272	0.000407272	0.00016396
GOTERM_BP_FAT	GO:0035107~appendage morphogenesis	35	1.16861	1.33965e-05	7.2914e+147	2208	75	9658	2.04124	0.0609848	0.00522991	0.0253234
GOTERM_BP_FAT	GO:0035108~limb morphogenesis	35	1.16861	1.33965e-05	7.2914e+147	2208	75	9658	2.04124	0.0609848	0.00522991	0.0253234
GOTERM_BP_FAT	GO:0060173~limb development	35	1.16861	2.65941e-05	7.2914e+147	2208	77	9658	1.98822	0.117428	0.00732097	0.0502652
GOTERM_BP_FAT	GO:0048736~appendage development	35	1.16861	2.65941e-05	7.2914e+147	2208	77	9658	1.98822	0.117428	0.00732097	0.0502652
GOTERM_BP_FAT	GO:0035113~embryonic appendage morphogenesis	32	1.06845	3.95543e-05	7.2914e+135	2208	69	9658	2.02857	0.169552	0.00973077	0.0747522
GOTERM_BP_FAT	GO:0030326~embryonic limb morphogenesis	32	1.06845	3.95543e-05	7.2914e+135	2208	69	9658	2.02857	0.169552	0.00973077	0.0747522
Annotation Cluster 3	Enrichment Score: 4.929215224600036
Category	Term	Count	%	PValue	Genes	List Total	Pop Hits	Pop Total	Fold Enrichment	Bonferroni	Benjamini	FDR
GOTERM_BP_FAT	GO:0002526~acute inflammatory response	36	1.202	3.73801e-07	2053,2147,59307,1191,2335,197,5005,336,113174,1604,12,1051,727,725,722,7018,4153,2152,3075,629,5265,3570,90,5345,839,6291,716,2,718,1675,5004,2161,3426,710,4067,732	2208	69	9658	2.28214	0.0017542	0.000585076	0.000706681
SP_PIR_KEYWORDS	acute phase	17	0.567613	4.25489e-06	3250,3263,3570,2147,3240,2335,5005,5345,6291,12,462,716,718,5004,722,4153,629,5265	2957	24	13223	3.1675	0.0034575	0.000577081	0.00654596
GOTERM_BP_FAT	GO:0006953~acute-phase response	16	0.534224	0.00102524	3570,2147,59307,2335,197,5345,5005,6291,113174,12,2,1051,5004,7018,4153,5265	2208	30	9658	2.33285	0.991917	0.0936476	1.92056
Annotation Cluster 4	Enrichment Score: 4.7392359302234714
Category	Term	Count	%	PValue	Genes	List Total	Pop Hits	Pop Total	Fold Enrichment	Bonferroni	Benjamini	FDR
GOTERM_BP_FAT	GO:0002526~acute inflammatory response	36	1.202	3.73801e-07	2053,2147,59307,1191,2335,197,5005,336,113174,1604,12,1051,727,725,722,7018,4153,2152,3075,629,5265,3570,90,5345,839,6291,716,2,718,1675,5004,2161,3426,710,4067,732	2208	69	9658	2.28214	0.0017542	0.000585076	0.000706681
GOTERM_BP_FAT	GO:0009611~response to wounding	125	4.17362	6.18102e-07	2147,1191,9241,1316,2335,10544,3683,336,51083,4615,2342,2152,2153,2159,51090,6291,3487,59082,7941,54899,2,5359,6364,2161,1490,7078,732,9435,7104,2628,2266,12,727,725,6372,722,64332,7048,1999,1508,629,4015,11343,10516,5154,5156,90,5627,5345,5624,5340,136319,716,718,4814,3426,4815,6382,710,7057,2053,3627,59307,2919,4853,3827,8767,197,1051,84962,2244,5327,7018,4153,3053,7852,8460,5265,50848,3576,703…	2208	366	9658	1.49388	0.00289901	0.000725543	0.00116854
GOTERM_BP_FAT	GO:0006954~inflammatory response	76	2.53756	1.33822e-05	2053,3627,2147,59307,1191,2919,8767,3827,2335,197,336,3683,51083,1051,4615,7018,7852,4153,8460,2152,5265,50848,3576,301,2122,3487,839,6256,6291,59082,54899,7941,2,6364,9111,2161,3588,732,9435,4048,5005,113174,1604,12,727,10630,725,6372,722,3556,64332,1999,3075,11343,629,3570,9936,90,2920,2921,5345,650,654,6335,4282,716,3162,718,1675,5004,3426,710,1535,4067,7057,4069	2208	210	9658	1.58301	0.0609219	0.00569794	0.0252965
GOTERM_BP_FAT	GO:0006952~defense response	101	3.37229	0.0357132	2147,1192,1191,2335,336,3683,51083,4615,55540,2152,602,6291,3487,59082,54899,7941,2,6364,4600,2161,732,9435,2625,81035,12,727,6376,725,6372,722,64332,819,1999,11343,629,22861,10312,90,55937,5345,9235,716,718,3426,85236,710,1471,7057,2053,3627,3240,59307,2919,3827,8767,197,1051,1054,23406,3107,3106,7852,4153,7018,8460,5265,3576,50848,3250,7033,301,2122,839,6256,1235,9111,3588,4048,8339,136,5005,66…	2208	372	9658	1.18759	1	0.631719	49.7179
Annotation Cluster 5	Enrichment Score: 4.58556131228762
Category	Term	Count	%	PValue	Genes	List Total	Pop Hits	Pop Total	Fold Enrichment	Bonferroni	Benjamini	FDR
GOTERM_CC_FAT	GO:0005615~extracellular space	157	5.24207	3.25125e-12	5950,686,338,2147,1191,10549,255738,9241,10404,2335,336,284,283,335,6414,3486,2152,5444,2153,5446,1280,9636,5176,9353,341,3489,344,3487,6291,55959,345,54918,5649,7941,1906,348,27122,27329,2,3549,6364,23452,2161,1278,93099,732,4224,213,2267,51599,56034,2266,5045,3026,3949,6376,727,174,6374,7424,6372,55068,7045,7044,100,4015,811,152189,8565,5154,55937,2638,5345,9235,57045,51118,5340,718,10495,183,7…	2030	412	8798	1.65154	2.12634e-09	2.12634e-09	4.85851e-09
GOTERM_CC_FAT	GO:0044421~extracellular region part	202	6.74457	3.48548e-11	338,1191,2335,336,335,7060,3486,2202,2201,341,3489,3487,344,55959,345,5649,348,2,6364,2331,1490,7077,7076,3912,7078,732,4224,22795,213,51599,3949,6376,727,174,6374,6372,7045,7044,79625,811,152189,4237,55937,10491,5345,5340,718,10495,183,1471,710,7057,3627,3240,4147,84171,3827,2254,3383,8842,54097,7448,3964,2244,5327,4153,89797,3250,302,3815,4982,7980,3958,5125,3263,10267,4879,5005,866,7474,3990,7…	2030	580	8798	1.50942	2.2795e-08	1.13975e-08	5.20848e-08
SP_PIR_KEYWORDS	signal	492	16.4274	2.48548e-05	338,25797,23516,336,51170,335,10618,8323,8325,3486,1825,1829,2202,2201,51368,8406,341,3489,3487,344,55959,345,5364,57211,348,2,1718,6364,26002,84898,2217,732,84293,213,10874,166647,130576,415,6376,727,174,175,725,6374,6372,722,6746,51299,629,79625,811,55937,285704,5345,23621,5340,427,716,118429,182,718,183,6383,85352,6385,6382,79630,710,29952,129303,3240,84171,57484,10954,8635,3385,27163,60343,88…	2957	1886	13223	1.16655	0.0200288	0.00252582	0.0382324
UP_SEQ_FEATURE	signal peptide	492	16.4274	2.68349e-05	338,25797,23516,336,51170,335,10618,8323,8325,3486,1825,1829,2202,2201,51368,8406,341,3489,3487,344,55959,345,5364,57211,348,2,1718,6364,26002,84898,2217,732,84293,213,10874,166647,130576,415,6376,727,174,175,725,6374,6372,722,6746,51299,629,79625,811,55937,285704,5345,23621,5340,427,716,118429,182,718,183,6383,85352,6385,6382,79630,710,29952,129303,3240,84171,57484,10954,8635,3385,27163,60343,88…	2956	1886	13210	1.16579	0.156336	0.0814884	0.0523275
SP_PIR_KEYWORDS	Secreted	256	8.54758	0.000140026	338,1191,2335,55741,336,51170,51083,335,55540,3486,11320,2202,2201,51368,341,3489,3487,344,345,5649,5364,348,2,6364,2331,1490,7077,7076,7078,3912,732,84293,5618,22795,10874,213,196792,12,727,6376,174,6374,725,6372,722,7045,7044,629,79625,811,4237,10590,55937,10491,5627,5345,139322,5340,118429,718,183,10495,6480,83729,79630,710,1471,3627,3240,4147,84171,2254,3827,8635,4753,60343,54097,7448,2244,31…	2957	935	13223	1.22435	0.107732	0.0103091	0.215213
GOTERM_CC_FAT	GO:0005576~extracellular region	304	10.1503	0.00044972	338,1191,2335,55741,336,51170,51083,335,5638,7060,55540,3486,11320,2202,2201,51368,341,3489,3487,344,345,55959,5649,5364,348,2,6364,2331,7077,1490,7076,7078,3912,732,84293,4224,5618,213,22795,10874,196792,51599,12,3949,727,6376,174,6374,725,6372,722,7045,629,7044,79625,152189,811,4237,10590,55937,10491,5627,5345,139322,5624,5340,716,118429,718,182,183,10495,6480,83729,79630,710,1471,7057,3627,414…	2030	1119	8798	1.17742	0.25486	0.0321586	0.669931
SP_PIR_KEYWORDS	glycoprotein	598	19.9666	0.000656905	338,25797,23516,10991,335,79701,10618,8323,10613,8325,3486,1825,538,1829,2202,2201,2852,8601,374378,51368,2013,6785,3489,3487,345,55959,27075,5364,57211,348,2,26002,10090,7345,84898,90139,2217,732,6752,213,166647,130576,145173,57228,55219,55117,415,6376,727,174,84889,175,725,722,6746,51299,6476,629,254531,79625,811,5244,5243,55937,285704,5345,23621,29015,5340,427,716,2824,118429,28234,182,718,183…	2957	2402	13223	1.11329	0.41427	0.0309746	1.00589
UP_SEQ_FEATURE	glycosylation site:N-linked (GlcNAc...)	557	18.5977	0.00556337	338,25797,23516,10991,79701,10618,8323,10613,8325,3486,1825,538,1829,2202,2201,2852,374378,51368,2013,6785,3487,55959,27075,5364,57211,2,26002,10090,84898,90139,2217,732,6752,166647,145173,55219,55117,415,6376,727,174,84889,175,725,722,6746,629,6476,254531,79625,811,5244,5243,55937,285704,5345,23621,29015,5340,427,716,2824,118429,28234,182,718,183,28231,85352,185,6480,6382,710,2823,80704,29952,12…	2956	2276	13210	1.09366	1	0.987939	10.3103
UP_SEQ_FEATURE	disulfide bond	336	11.2187	0.0712547	153579,83700,338,10205,5738,1192,1191,1193,2335,336,5638,7060,8323,8325,54495,3486,2202,4515,2201,2852,374378,204,3714,8406,3489,3487,4884,5649,57211,2,6364,26002,2331,7077,1490,7076,7078,3912,2217,732,5754,6752,4224,5618,213,22795,19,1075,51599,13,3949,727,6376,174,175,6374,725,6372,722,7048,7045,7184,629,7044,6476,811,4237,55937,5627,5345,5624,23621,5340,5621,716,118429,718,182,185,6480,83729,7…	2956	1398	13210	1.07406	1	1	76.3497
SP_PIR_KEYWORDS	disulfide bond	348	11.6194	0.112502	153579,83700,338,10205,5738,1192,1191,1193,2335,336,5638,7060,8323,8325,54495,3486,2202,4515,2201,2852,374378,204,3714,8406,3489,3487,4884,5649,57211,2,6364,26002,4124,2331,7077,1490,7076,7078,3912,2217,732,5754,6752,4224,5618,213,22795,19,1075,51599,13,3949,727,6376,174,175,6374,725,6372,722,7048,7045,7184,629,7044,6476,811,4237,55937,5627,5345,5624,23621,5340,5621,716,118429,718,182,183,185,258…	2957	1468	13223	1.06006	1	0.681119	84.0575
Annotation Cluster 6	Enrichment Score: 4.477276640635186
Category	Term	Count	%	PValue	Genes	List Total	Pop Hits	Pop Total	Fold Enrichment	Bonferroni	Benjamini	FDR
GOTERM_BP_FAT	GO:0035295~tube development	72	2.40401	2.13881e-07	5950,7291,3087,23513,9241,2254,10395,7020,1050,2296,8323,23405,2294,7852,538,3237,3239,1482,6493,3202,7546,7547,3207,9353,7976,7408,2264,2719,1906,1717,3549,8829,4124,5499,1490,23414,5125,25831,5754,55212,2034,5664,64759,51696,3169,2627,8092,7474,57619,10630,7048,4781,3170,100,4015,9618,5154,9421,10252,5156,93,5629,90,650,655,2737,9839,427,7050,183,2138,7009	2208	178	9658	1.7693	0.0010041	0.000502174	0.000404349
GOTERM_BP_FAT	GO:0030323~respiratory tube development	36	1.202	3.56952e-05	5950,2034,64759,5664,2254,2627,3169,51696,7474,1050,10630,23405,2294,538,7048,4781,3170,100,4015,6493,3202,5154,9618,93,5156,5629,2264,2737,1717,427,4124,5499,1490,23414,7009,5125	2208	81	9658	1.94404	0.154362	0.00927138	0.0674614
GOTERM_BP_FAT	GO:0030324~lung development	33	1.10184	0.000246567	5950,2034,64759,5664,2254,3169,2627,7474,1050,10630,23405,2294,538,7048,4781,3170,100,4015,6493,3202,5154,93,5156,5629,2264,2737,1717,427,4124,5499,1490,23414,7009	2208	78	9658	1.85058	0.68597	0.0308196	0.465115
GOTERM_BP_FAT	GO:0060541~respiratory system development	34	1.13523	0.000654901	5950,2034,64759,5664,2254,2627,3169,7474,1050,10630,23405,2294,538,7048,4781,23322,3170,100,4015,6493,3202,5154,93,5156,5629,2264,2737,1717,427,4124,5499,1490,23414,7009	2208	85	9658	1.74964	0.953906	0.066094	1.23088
Annotation Cluster 7	Enrichment Score: 4.42687801427257
Category	Term	Count	%	PValue	Genes	List Total	Pop Hits	Pop Total	Fold Enrichment	Bonferroni	Benjamini	FDR
GOTERM_BP_FAT	GO:0006638~neutral lipid metabolic process	23	0.767947	5.91023e-06	8.69434e+91	2208	39	9658	2.57959	0.0273787	0.0055367	0.0111729
GOTERM_BP_FAT	GO:0018904~organic ether metabolic process	24	0.801336	7.15903e-06	8.69434e+95	2208	42	9658	2.49948	0.033067	0.00558867	0.0135335
GOTERM_BP_FAT	GO:0006662~glycerol ether metabolic process	23	0.767947	1.03109e-05	8.69434e+91	2208	40	9658	2.5151	0.0472765	0.00603553	0.0194913
GOTERM_BP_FAT	GO:0006639~acylglycerol metabolic process	22	0.734558	1.48475e-05	8.69434e+87	2208	38	9658	2.53237	0.0673631	0.0053502	0.028066
GOTERM_BP_FAT	GO:0006641~triglyceride metabolic process	19	0.634391	0.000128256	8.69434e+74	2208	34	9658	2.44435	0.452535	0.0220661	0.242194
GOTERM_BP_FAT	GO:0046486~glycerolipid metabolic process	46	1.53589	0.00330556	5.12279e+193	2208	135	9658	1.49043	1	0.161991	6.06773
Annotation Cluster 8	Enrichment Score: 4.0091576842375085
Category	Term	Count	%	PValue	Genes	List Total	Pop Hits	Pop Total	Fold Enrichment	Bonferroni	Benjamini	FDR
GOTERM_BP_FAT	GO:0048598~embryonic morphogenesis	93	3.10518	8.67267e-08	154796,5950,7291,4041,221833,7704,4853,9241,2254,10194,10395,7020,2296,6927,7358,3198,8323,2673,23405,2294,3237,2290,3236,3239,2201,7545,4488,1280,3202,3203,7546,2019,3714,3204,3205,3206,2122,3207,9353,3209,7976,22943,7408,1906,64327,4646,4221,3142,23314,4609,25831,6934,5754,3218,2132,3216,3217,51715,3212,3213,5664,1746,1749,8092,8613,7474,9027,7041,79068,57619,7424,3221,7048,23322,3170,10736,942…	2208	244	9658	1.66718	0.000407272	0.000407272	0.00016396
GOTERM_BP_FAT	GO:0048568~embryonic organ development	51	1.70284	6.53214e-05	5.95092e+207	2208	132	9658	1.68999	0.26422	0.0145045	0.12342
GOTERM_BP_FAT	GO:0009792~embryonic development ending in birth or egg hatching	93	3.10518	0.000101314	154796,5950,7291,3110,8531,689,338,8533,9241,2254,1045,9412,10395,118,7020,2648,6928,1050,2296,1051,6927,8323,2673,2294,57178,3236,1482,1280,3202,3203,7546,2019,3204,3205,2122,7976,7408,1906,9915,10370,8788,4124,4221,1277,23414,23314,5932,5125,25831,6934,5754,1601,824,3218,3219,3216,3217,3212,4683,1745,2034,3213,5664,1746,2627,8092,5080,57619,727,7048,1543,23322,3170,10736,100,598,9421,5156,5629,…	2208	283	9658	1.43742	0.378671	0.0181372	0.191364
GOTERM_BP_FAT	GO:0043009~chordate embryonic development	92	3.07179	0.000128644	154796,5950,7291,3110,8531,689,338,8533,9241,2254,1045,9412,10395,118,7020,2648,6928,1050,2296,1051,6927,8323,2673,2294,57178,3236,1482,1280,3202,3203,7546,2019,3204,3205,2122,7976,7408,1906,9915,10370,8788,4124,4221,1277,23414,23314,5932,5125,25831,6934,5754,1601,824,3218,3219,3216,3217,3212,4683,1745,2034,3213,5664,1746,2627,8092,5080,57619,727,7048,23322,3170,10736,100,598,9421,5156,5629,4436,…	2208	281	9658	1.43209	0.453531	0.0213502	0.242925
GOTERM_BP_FAT	GO:0001701~in utero embryonic development	42	1.40234	0.121884	154796,1601,824,8531,689,338,8533,4683,2034,2627,1045,9412,118,1050,6928,2296,6927,1051,727,2294,57178,23322,100,5156,598,9421,2122,4436,90,4435,2737,9915,1906,4487,10370,55632,23764,4124,4061,23414,2530,5932	2208	151	9658	1.21664	1	0.875521	91.433
Annotation Cluster 9	Enrichment Score: 3.7789575994985247
Category	Term	Count	%	PValue	Genes	List Total	Pop Hits	Pop Total	Fold Enrichment	Bonferroni	Benjamini	FDR
GOTERM_BP_FAT	GO:0048706~embryonic skeletal system development	31	1.03506	1.91281e-05	3.2186e+127	2208	64	9658	2.1187	0.0859277	0.0059718	0.0361561
GOTERM_BP_FAT	GO:0048568~embryonic organ development	51	1.70284	6.53214e-05	5.95092e+207	2208	132	9658	1.68999	0.26422	0.0145045	0.12342
GOTERM_BP_FAT	GO:0048562~embryonic organ morphogenesis	40	1.33556	9.19598e-05	3.2186e+162	2208	97	9658	1.80375	0.350761	0.0186054	0.17371
GOTERM_BP_FAT	GO:0048704~embryonic skeletal system morphogenesis	22	0.734558	0.000244969	3.21832e+91	2208	44	9658	2.18705	0.683604	0.0314601	0.462108
GOTERM_BP_FAT	GO:0048705~skeletal system morphogenesis	32	1.06845	0.00452663	3218,3216,3217,3212,3213,9241,1746,8092,7020,2673,3237,7048,3236,10736,6662,3202,1280,3203,3204,93,5156,5191,3207,2690,2737,1277,116039,4221,2138,1490,23314,4609	2208	87	9658	1.60886	1	0.204781	8.21963
Annotation Cluster 10	Enrichment Score: 3.543903125498117
Category	Term	Count	%	PValue	Genes	List Total	Pop Hits	Pop Total	Fold Enrichment	Bonferroni	Benjamini	FDR
GOTERM_BP_FAT	GO:0008203~cholesterol metabolic process	37	1.23539	9.24956e-06	6721,338,4047,19,255738,4598,847,2232,336,335,3990,10449,2224,3949,6927,51302,114876,5562,3156,341,3158,10682,3157,6256,345,6718,348,1717,1593,27329,1718,4597,6720,7108,8431,3422,8435	2208	80	9658	2.02302	0.0425152	0.00618727	0.0174852
GOTERM_BP_FAT	GO:0016125~sterol metabolic process	39	1.30217	1.70627e-05	6721,338,4047,19,255738,4598,847,2232,336,335,3990,10449,2224,3949,6927,51302,114876,5562,3156,51700,341,3158,10682,3157,6256,345,6718,348,1717,1593,6307,27329,1718,4597,6720,7108,8431,8435,3422	2208	88	9658	1.93852	0.0770169	0.00570825	0.0322528
GOTERM_BP_FAT	GO:0006695~cholesterol biosynthetic process	15	0.500835	0.000187851	4.04711e+60	2208	24	9658	2.73381	0.586219	0.0280638	0.354542
SP_PIR_KEYWORDS	lipid synthesis	35	1.16861	0.000242195	3995,4047,4598,91012,3992,51170,9415,2224,6319,5565,55711,5562,3156,79603,29956,51700,84649,6785,3158,8560,10682,3157,3294,54898,5091,1717,1718,6307,4597,31,51144,7108,27349,3422,84188	2957	86	13223	1.8199	0.17895	0.0150525	0.371969
KEGG_PATHWAY	hsa00900:Terpenoid backbone biosynthesis	11	0.367279	0.000255026	2224,57107,79947,23590,4597,3156,3158,4598,3157,3422,39	879	14	3618	3.23403	0.0480342	0.0243127	0.317319
GOTERM_BP_FAT	GO:0008202~steroid metabolic process	59	1.96995	0.000288784	6721,338,4047,255738,4598,847,336,51170,6822,335,10202,10449,6927,3156,9971,706,3291,341,3294,6256,345,8309,348,1593,23600,1717,8630,1718,6307,27329,4597,5618,19,5007,866,2232,3990,2224,3949,5205,51302,174,114876,5562,1543,51700,10682,2638,3158,3157,6718,2494,8431,7108,51144,6720,7363,8435,3422	2208	167	9658	1.54534	0.742469	0.034187	0.544547
SP_PIR_KEYWORDS	Steroid biosynthesis	19	0.634391	0.000380951	51700,4047,3158,10682,3157,3294,4598,39,51170,2224,1717,6307,1718,4597,5562,3156,51144,7108,3422	2957	37	13223	2.29631	0.266665	0.0204646	0.584491
SP_PIR_KEYWORDS	Cholesterol biosynthesis	12	0.400668	0.000445666	1.71722e+48	2957	18	13223	2.98117	0.304311	0.0224231	0.683464
SP_PIR_KEYWORDS	sterol biosynthesis	14	0.467446	0.000678721	5.17001e+57	2957	24	13223	2.60853	0.424586	0.0302371	1.03913
GOTERM_BP_FAT	GO:0016126~sterol biosynthetic process	17	0.567613	0.00107328	5.17004e+69	2208	33	9658	2.25332	0.993551	0.0941666	2.00969
GOTERM_BP_FAT	GO:0006694~steroid biosynthetic process	28	0.934891	0.00170989	4.04756e+117	2208	69	9658	1.77499	0.999677	0.11149	3.18358
GOTERM_BP_FAT	GO:0008299~isoprenoid biosynthetic process	11	0.367279	0.00265832	2.22457e+46	2208	18	9658	2.67306	0.999996	0.143032	4.90781
Annotation Cluster 11	Enrichment Score: 3.1737473445304323
Category	Term	Count	%	PValue	Genes	List Total	Pop Hits	Pop Total	Fold Enrichment	Bonferroni	Benjamini	FDR
GOTERM_MF_FAT	GO:0004857~enzyme inhibitor activity	72	2.40401	7.75641e-06	7291,2810,2644,3827,5635,197,331,336,5636,94274,8525,3053,5267,5265,7035,302,301,5176,341,306,344,307,59082,345,3309,6691,2,27329,10628,7980,5502,5270,5272,7077,7076,116154,7078,402,56925,6690,5104,55450,1029,5045,1028,51499,866,1027,81706,1026,12,1031,727,6906,1992,3698,51156,6622,598,7013,5566,5627,5345,462,718,183,10788,9467,1471,259,710,151242	2124	192	9211	1.62624	0.013153	0.013153	0.0130882
GOTERM_MF_FAT	GO:0004866~endopeptidase inhibitor activity	40	1.33556	3.67722e-05	5104,3827,5045,197,866,331,51499,12,727,6906,3698,1992,51156,3053,5267,5265,7035,6622,598,5176,5627,5345,3309,59082,462,6691,2,7980,718,183,5270,5272,7077,7076,7078,710,1471,259,56925,6690	2124	93	9211	1.86522	0.0608418	0.0308983	0.0620354
SP_PIR_KEYWORDS	serine proteinase inhibitor	14	0.467446	5.25954e-05	7035,5104,5345,12,6691,462,7980,1992,5270,3053,259,5267,5265,6690	2957	20	13223	3.13023	0.0419102	0.00474579	0.0808876
GOTERM_MF_FAT	GO:0030414~peptidase inhibitor activity	40	1.33556	6.49485e-05	5104,3827,5045,197,866,331,51499,12,727,6906,3698,1992,51156,3053,5267,5265,7035,6622,598,5176,5627,5345,3309,59082,462,6691,2,7980,718,183,5270,5272,7077,7076,7078,710,1471,259,56925,6690	2124	95	9211	1.82595	0.104945	0.0362823	0.109545
SMART	SM00093:SERPIN	16	0.534224	0.000552783	5104,5176,5345,866,12,462,6906,183,1992,5270,5272,3053,51156,710,5267,5265	1408	30	6501	2.4625	0.20152	0.106423	0.770204
INTERPRO	IPR000215:Protease inhibitor I4, serpin	16	0.534224	0.000916131	5104,5176,5345,866,12,462,6906,183,1992,5270,5272,3053,51156,710,5267,5265	2659	30	11754	2.35758	0.927627	0.583265	1.62854
PIR_SUPERFAMILY	PIRSF001630:serpin	14	0.467446	0.00386524	5104,5176,5345,866,12,462,6906,183,1992,5270,5272,3053,5267,5265	1223	26	5036	2.21725	0.990953	0.990953	6.07803
GOTERM_MF_FAT	GO:0004867~serine-type endopeptidase inhibitor activity	24	0.801336	0.00431952	7035,5104,5176,5045,5345,866,12,6691,462,2,7980,6906,183,1992,3698,5270,5272,3053,51156,259,710,5267,5265,6690	2124	59	9211	1.76405	0.999382	0.602942	7.04459
UP_SEQ_FEATURE	site:Reactive bond	14	0.467446	0.00842421	7035,5104,12,6691,462,7980,5270,5272,51156,3053,710,5267,5265,6690	2956	30	13210	2.08548	1	0.997407	15.2112
SP_PIR_KEYWORDS	protease inhibitor	24	0.801336	0.0112842	7035,5104,3827,5345,331,59082,2719,12,6691,462,2,7980,1992,3698,5270,5272,3053,51156,259,1471,710,5267,5265,6690	2957	65	13223	1.65111	0.999903	0.220938	16.0203
SP_PIR_KEYWORDS	Serine protease inhibitor	19	0.634391	0.015666	7035,5104,5345,12,6691,462,2,7980,1992,3698,5270,5272,3053,51156,259,710,5267,5265,6690	2957	49	13223	1.73395	0.999997	0.274813	21.5673
Annotation Cluster 12	Enrichment Score: 3.1210948893656436
Category	Term	Count	%	PValue	Genes	List Total	Pop Hits	Pop Total	Fold Enrichment	Bonferroni	Benjamini	FDR
GOTERM_BP_FAT	GO:0046395~carboxylic acid catabolic process	39	1.30217	4.23626e-05	2747,1374,383,3081,10327,10295,2746,37,6822,435,51302,1891,1666,2954,4329,112487,5444,5446,5191,5194,2731,3295,1962,1384,5053,23564,6718,8309,2805,275,55556,8659,26002,30,144193,4522,200205,51,56922	2208	91	9658	1.87461	0.180435	0.00989973	0.0800575
GOTERM_BP_FAT	GO:0016054~organic acid catabolic process	39	1.30217	4.23626e-05	2747,1374,383,3081,10327,10295,2746,37,6822,435,51302,1891,1666,2954,4329,112487,5444,5446,5191,5194,2731,3295,1962,1384,5053,23564,6718,8309,2805,275,55556,8659,26002,30,144193,4522,200205,51,56922	2208	91	9658	1.87461	0.180435	0.00989973	0.0800575
GOTERM_BP_FAT	GO:0009063~cellular amino acid catabolic process	21	0.701169	0.0102639	2.74727e+91	2208	53	9658	1.73313	1	0.343859	17.7203
GOTERM_BP_FAT	GO:0009310~amine catabolic process	22	0.734558	0.0177968	2.74741e+95	2208	59	9658	1.63102	1	0.467108	28.7863
Annotation Cluster 13	Enrichment Score: 3.012042454537253
Category	Term	Count	%	PValue	Genes	List Total	Pop Hits	Pop Total	Fold Enrichment	Bonferroni	Benjamini	FDR
GOTERM_BP_FAT	GO:0031016~pancreas development	17	0.567613	9.13743e-05	3110,3670,3570,93,1191,6659,5629,9451,6928,6927,3549,9480,174,4821,3642,3170,6934	2208	28	9658	2.6557	0.348973	0.0193202	0.172605
GOTERM_BP_FAT	GO:0031018~endocrine pancreas development	10	0.33389	0.00107384	6.92831e+39	2208	14	9658	3.12435	0.993569	0.0924887	2.01074
GOTERM_BP_FAT	GO:0035270~endocrine system development	22	0.734558	0.00937793	3.20231e+87	2208	56	9658	1.71839	1	0.331238	16.3166
Annotation Cluster 14	Enrichment Score: 2.945281291118279
Category	Term	Count	%	PValue	Genes	List Total	Pop Hits	Pop Total	Fold Enrichment	Bonferroni	Benjamini	FDR
KEGG_PATHWAY	hsa04610:Complement and coagulation cascades	34	1.13523	4.72724e-08	2147,5104,3827,2266,1604,727,725,2244,722,5327,4153,3053,2152,3075,2153,629,5265,2159,7035,1361,5627,5345,5624,2243,5340,462,716,2,718,1675,3426,2161,710,732	879	57	3618	2.45518	9.12352e-06	9.12352e-06	5.89052e-05
SP_PIR_KEYWORDS	blood coagulation	19	0.634391	0.000155801	2.1597e+74	2957	35	13223	2.42753	0.119118	0.0105137	0.239432
GOTERM_BP_FAT	GO:0042060~wound healing	50	1.66945	0.0011545	2.14749e+202	2208	143	9658	1.5294	0.995599	0.0939417	2.16021
BIOCARTA	h_intrinsicPathway:Intrinsic Prothrombin Activation Pathway	11	0.367279	0.00297206	2.15946e+41	290	17	1152	2.57039	0.550974	0.234244	3.83577
GOTERM_BP_FAT	GO:0050817~coagulation	28	0.934891	0.0118135	2.14738e+110	2208	78	9658	1.57019	1	0.369543	20.1219
GOTERM_BP_FAT	GO:0007596~blood coagulation	28	0.934891	0.0118135	2.14738e+110	2208	78	9658	1.57019	1	0.369543	20.1219
GOTERM_BP_FAT	GO:0007599~hemostasis	28	0.934891	0.0233404	2.14738e+110	2208	82	9658	1.49359	1	0.529812	36.013
GOTERM_BP_FAT	GO:0050878~regulation of body fluid levels	33	1.10184	0.0332851	2.14749e+130	2208	103	9658	1.40141	1	0.614072	47.2695
Annotation Cluster 15	Enrichment Score: 2.773535502524092
Category	Term	Count	%	PValue	Genes	List Total	Pop Hits	Pop Total	Fold Enrichment	Bonferroni	Benjamini	FDR
GOTERM_BP_FAT	GO:0048729~tissue morphogenesis	54	1.80301	0.000218885	7291,284217,4853,23513,10395,7020,6927,2296,80144,8323,2294,538,3237,94234,1482,3202,3714,7546,341640,3207,9353,7137,7976,6256,7408,2719,1277,1278,25831,5754,2132,760,3212,8092,7041,57619,7424,10468,9421,5629,2926,90,5566,650,57045,655,2737,9839,7050,182,183,4061,2138,2139	2208	148	9658	1.59595	0.642355	0.031621	0.412999
GOTERM_BP_FAT	GO:0035239~tube morphogenesis	40	1.33556	0.000779812	5754,7291,55212,23513,3169,8092,10395,7020,57619,10630,8323,23405,2294,7852,3237,7048,3239,1482,3170,3202,7546,7547,9421,3207,90,7976,7408,650,655,2737,2719,1906,9839,7050,3549,183,8829,5499,2138,25831	2208	106	9658	1.6506	0.974376	0.0734967	1.46401
GOTERM_BP_FAT	GO:0002009~morphogenesis of an epithelium	35	1.16861	0.00186288	5.75473e+144	2208	93	9658	1.64616	0.999843	0.114533	3.46371
GOTERM_BP_FAT	GO:0060429~epithelium development	55	1.83639	0.00218227	2.05473e+226	2208	165	9658	1.45803	0.999965	0.126299	4.04603
GOTERM_BP_FAT	GO:0060562~epithelial tube morphogenesis	23	0.767947	0.0195445	5.75432e+93	2208	63	9658	1.59689	1	0.491713	31.144
Annotation Cluster 16	Enrichment Score: 2.718021504475676
Category	Term	Count	%	PValue	Genes	List Total	Pop Hits	Pop Total	Fold Enrichment	Bonferroni	Benjamini	FDR
GOTERM_CC_FAT	GO:0031983~vesicle lumen	22	0.734558	2.91831e-05	338,5154,1191,213,2266,2335,5627,5345,290,6678,2243,7060,2,1675,7424,2244,7076,710,2153,7044,5265,7057	2030	39	8798	2.44481	0.018905	0.00634181	0.0436005
GOTERM_CC_FAT	GO:0060205~cytoplasmic membrane-bounded vesicle lumen	20	0.66778	0.000161994	5154,1191,213,2266,2335,5627,5345,6678,2243,7060,2,1675,7424,2244,7076,710,2153,7044,5265,7057	2030	37	8798	2.3427	0.100533	0.0175038	0.241801
GOTERM_CC_FAT	GO:0031093~platelet alpha granule lumen	19	0.634391	0.000234633	1191,213,2266,2335,5627,5345,6678,2243,7060,2,1675,7424,2244,7076,710,2153,7044,5265,7057	2030	35	8798	2.35274	0.142272	0.0190006	0.350047
GOTERM_CC_FAT	GO:0031091~platelet alpha granule	19	0.634391	0.00341652	1191,213,2266,2335,5627,5345,6678,2243,7060,2,1675,7424,2244,7076,710,2153,7044,5265,7057	2030	42	8798	1.96061	0.893353	0.147749	4.9856
GOTERM_CC_FAT	GO:0044433~cytoplasmic vesicle part	41	1.36895	0.0818981	1601,338,1191,213,2335,2266,203547,6678,3382,10675,7060,3949,10483,83988,8905,7424,2244,54910,130340,23095,5868,2555,2153,7044,5265,22822,5154,817,9522,26958,5627,5345,2243,22820,2,1675,4646,7076,710,7057,11316	2030	141	8798	1.26024	1	0.719183	72.109
GOTERM_CC_FAT	GO:0030141~secretory granule	36	1.202	0.158487	1191,213,64924,2266,2335,6809,51083,6678,3382,335,7060,7424,2244,5327,7018,5868,2153,7044,5265,4922,7033,5154,5321,9522,5627,3815,5345,4884,2243,2,1675,7076,710,1535,5125,7057	2030	129	8798	1.20949	1	0.871499	92.4115
Annotation Cluster 17	Enrichment Score: 2.537542966596655
Category	Term	Count	%	PValue	Genes	List Total	Pop Hits	Pop Total	Fold Enrichment	Bonferroni	Benjamini	FDR
SMART	SM00214:VWC	12	0.400668	0.00111809	7.83713e+50	1408	20	6501	2.77031	0.365753	0.140816	1.55216
INTERPRO	IPR001007:von Willebrand factor, type C	12	0.400668	0.00165694	7.83713e+50	2659	20	11754	2.65228	0.991357	0.695098	2.92707
UP_SEQ_FEATURE	domain:VWFC	8	0.267112	0.0131701	7.83713e+32	2956	13	13210	2.75008	1	0.998436	22.7856
Annotation Cluster 18	Enrichment Score: 2.4175652083034525
Category	Term	Count	%	PValue	Genes	List Total	Pop Hits	Pop Total	Fold Enrichment	Bonferroni	Benjamini	FDR
GOTERM_BP_FAT	GO:0050818~regulation of coagulation	18	0.601002	0.000734395	2.14752e+68	2208	35	9658	2.24953	0.968277	0.072271	1.37931
GOTERM_BP_FAT	GO:0030193~regulation of blood coagulation	16	0.534224	0.00102524	2.14752e+61	2208	30	9658	2.33285	0.991917	0.0936476	1.92056
GOTERM_BP_FAT	GO:0030195~negative regulation of blood coagulation	12	0.400668	0.00302447	5.15421e+44	2208	21	9658	2.49948	0.999999	0.152475	5.56564
GOTERM_BP_FAT	GO:0050819~negative regulation of coagulation	13	0.434057	0.00325761	5.15421e+47	2208	24	9658	2.3693	1	0.161517	5.98226
GOTERM_BP_FAT	GO:0051241~negative regulation of multicellular organismal process	38	1.26878	0.0154289	5.95021e+140	2208	116	9658	1.43289	1	0.434803	25.4695
GOTERM_BP_FAT	GO:0032101~regulation of response to external stimulus	35	1.16861	0.027288	2147,7103,136,3827,197,6376,10630,2877,7048,4907,2152,604,100,3576,3570,5154,1361,302,5321,9353,5176,5345,5624,350,1906,5340,348,462,2,718,183,185,2161,710,7057	2208	109	9658	1.40453	1	0.572313	40.7294
Annotation Cluster 19	Enrichment Score: 2.3547147017349688
Category	Term	Count	%	PValue	Genes	List Total	Pop Hits	Pop Total	Fold Enrichment	Bonferroni	Benjamini	FDR
GOTERM_BP_FAT	GO:0009991~response to extracellular stimulus	63	2.10351	0.00023544	5950,1192,6772,255738,284,9388,435,8739,432,4929,3291,5321,79792,3294,6256,3309,166,4982,2,1277,3643,7078,440275,23411,10763,6752,1373,2934,136,213,2628,8614,1026,3992,360,3171,54332,10013,6581,7048,1543,1509,3655,4232,6476,629,595,5154,81788,3158,55937,2690,650,655,23564,462,2180,3162,6720,590,8435,4067,898	2208	180	9658	1.53093	0.669117	0.0320057	0.444169
GOTERM_BP_FAT	GO:0031667~response to nutrient levels	55	1.83639	0.00253009	5950,1192,6772,255738,284,9388,435,8739,3291,5321,3294,6256,3309,4982,2,1277,3643,7078,23411,440275,10763,6752,1373,213,2934,2628,8614,3992,360,3171,54332,10013,6581,7048,1543,1509,4232,6476,629,595,5154,81788,3158,55937,2690,650,655,23564,462,2180,3162,6720,590,8435,898	2208	166	9658	1.44925	0.999993	0.138204	4.67641
GOTERM_BP_FAT	GO:0007584~response to nutrient	39	1.30217	0.0139739	6752,5950,1192,6772,2934,2628,8614,3992,284,9388,360,435,54332,7048,1543,4232,629,6476,595,5154,5321,55937,3158,3294,650,6256,655,23564,4982,462,2180,2,3162,1277,3643,7078,590,8435,898	2208	119	9658	1.43353	1	0.410681	23.3595
GOTERM_BP_FAT	GO:0033273~response to vitamin	20	0.66778	0.0457939	5.95595e+73	2208	57	9658	1.53477	1	0.674808	58.778
Annotation Cluster 20	Enrichment Score: 2.325768094218525
Category	Term	Count	%	PValue	Genes	List Total	Pop Hits	Pop Total	Fold Enrichment	Bonferroni	Benjamini	FDR
GOTERM_BP_FAT	GO:0035239~tube morphogenesis	40	1.33556	0.000779812	5754,7291,55212,23513,3169,8092,10395,7020,57619,10630,8323,23405,2294,7852,3237,7048,3239,1482,3170,3202,7546,7547,9421,3207,90,7976,7408,650,655,2737,2719,1906,9839,7050,3549,183,8829,5499,2138,25831	2208	106	9658	1.6506	0.974376	0.0734967	1.46401
GOTERM_BP_FAT	GO:0048754~branching morphogenesis of a tube	21	0.701169	0.0102639	3202,3207,90,3169,650,655,2719,2737,1906,3549,183,8829,5499,23405,2294,2138,7852,7048,3237,3239,3170	2208	53	9658	1.73313	1	0.343859	17.7203
GOTERM_BP_FAT	GO:0001763~morphogenesis of a branching structure	23	0.767947	0.0131641	3202,3207,90,1746,3169,650,655,2719,2737,1906,3549,1501,183,8829,5499,23405,2294,2138,7852,7048,3237,3239,3170	2208	61	9658	1.64925	1	0.39712	22.1608
Annotation Cluster 21	Enrichment Score: 2.2875254858437666
Category	Term	Count	%	PValue	Genes	List Total	Pop Hits	Pop Total	Fold Enrichment	Bonferroni	Benjamini	FDR
GOTERM_CC_FAT	GO:0005887~integral to plasma membrane	193	6.44407	0.00451539	10206,10991,5638,8323,55540,7162,6616,2852,3714,1184,5364,27075,10478,732,6752,5754,4224,19,23531,9986,55117,3949,9194,727,7048,5244,10312,7216,30061,55937,130399,23621,182,28234,6383,185,6385,6382,4853,4354,10246,3385,10580,56301,9076,8842,3383,4071,10381,432,83941,3107,3106,7852,8501,2995,3105,4363,7976,2264,9213,55890,9482,2569,3249,2560,10267,136,961,3804,1604,5205,10630,7871,4059,7855,2346,9…	2030	707	8798	1.18311	0.948168	0.17907	6.53918
GOTERM_CC_FAT	GO:0044459~plasma membrane part	368	12.2871	0.00543965	10206,80742,23513,2335,10991,3728,83604,5638,8323,3927,55540,23136,1825,538,7162,1829,65059,6616,2852,1488,8871,127262,3714,1184,153562,81848,27075,5364,23268,348,10478,51762,115677,3912,2217,732,5754,6752,4224,55212,5255,23531,19,166647,9986,10226,10327,4640,55117,92140,3949,7041,9194,57619,727,27289,7048,58480,811,117178,5244,10312,10590,5243,54874,817,7216,55937,30061,285704,130399,137075,2362…	2030	1427	8798	1.11767	0.971766	0.199847	7.82751
GOTERM_CC_FAT	GO:0031226~intrinsic to plasma membrane	196	6.54424	0.00558673	10206,10991,5638,8323,55540,7162,6616,2852,3714,1184,5364,27075,10478,732,6752,5754,4224,19,23531,9986,55117,3949,9194,727,7048,5244,10312,7216,30061,55937,285704,130399,23621,182,28234,6383,185,6385,6382,4853,4354,10246,3385,10580,56301,9076,8842,3383,4071,10381,432,83941,3107,3106,7852,8501,2995,3105,4363,7976,2264,9213,55890,9482,2569,3249,2560,10267,136,961,1604,3804,5205,10630,7871,4059,7855…	2030	722	8798	1.17654	0.974369	0.193884	8.031
Annotation Cluster 22	Enrichment Score: 2.159169809904735
Category	Term	Count	%	PValue	Genes	List Total	Pop Hits	Pop Total	Fold Enrichment	Bonferroni	Benjamini	FDR
INTERPRO	IPR002198:Short-chain dehydrogenase/reductase SDR	20	0.66778	0.00464008	5.86026e+89	2659	47	11754	1.88105	0.999998	0.930398	7.99412
INTERPRO	IPR002347:Glucose/ribitol dehydrogenase	18	0.601002	0.0071206	2.59793e+80	2659	42	11754	1.89448	1	0.946324	12.0162
INTERPRO	IPR016040:NAD(P)-binding domain	42	1.40234	0.0100797	2.74711e+184	2659	129	11754	1.43922	1	0.945114	16.5972
Annotation Cluster 23	Enrichment Score: 2.1407762435266653
Category	Term	Count	%	PValue	Genes	List Total	Pop Hits	Pop Total	Fold Enrichment	Bonferroni	Benjamini	FDR
GOTERM_BP_FAT	GO:0046942~carboxylic acid transport	40	1.33556	0.00143758	1.20104e+174	2208	109	9658	1.60517	0.998837	0.100198	2.6831
GOTERM_BP_FAT	GO:0015849~organic acid transport	40	1.33556	0.00174512	1.20104e+174	2208	110	9658	1.59058	0.999726	0.110593	3.24817
GOTERM_BP_FAT	GO:0015837~amine transport	31	1.03506	0.00331186	1.20104e+137	2208	82	9658	1.65362	1	0.160605	6.07895
GOTERM_BP_FAT	GO:0006865~amino acid transport	25	0.834725	0.0108354	1.20104e+112	2208	67	9658	1.63212	1	0.351866	18.6138
GOTERM_MF_FAT	GO:0005275~amine transmembrane transporter activity	19	0.634391	0.0133857	1.12547e+85	2124	47	9211	1.75311	1	0.829585	20.3407
SP_PIR_KEYWORDS	amino-acid transport	12	0.400668	0.0246043	1.20104e+56	2957	27	13223	1.98745	1	0.350437	31.8373
GOTERM_MF_FAT	GO:0015171~amino acid transmembrane transporter activity	16	0.534224	0.034877	1.12547e+72	2124	41	9211	1.69234	1	0.911426	45.0673
Annotation Cluster 24	Enrichment Score: 2.121032066839378
Category	Term	Count	%	PValue	Genes	List Total	Pop Hits	Pop Total	Fold Enrichment	Bonferroni	Benjamini	FDR
GOTERM_BP_FAT	GO:0030334~regulation of cell migration	49	1.63606	0.00210042	5.16815e+206	2208	143	9658	1.49882	0.999949	0.123379	3.89711
GOTERM_BP_FAT	GO:0051270~regulation of cell motion	55	1.83639	0.00218227	1.54797e+230	2208	165	9658	1.45803	0.999965	0.126299	4.04603
GOTERM_BP_FAT	GO:0040012~regulation of locomotion	52	1.73623	0.00292083	5.16815e+218	2208	156	9658	1.45803	0.999999	0.152558	5.37988
GOTERM_BP_FAT	GO:0040017~positive regulation of locomotion	28	0.934891	0.0198629	1.54796e+115	2208	81	9658	1.51203	1	0.492344	31.5656
GOTERM_BP_FAT	GO:0051272~positive regulation of cell motion	29	0.96828	0.0210692	1.54796e+118	2208	85	9658	1.49234	1	0.500715	33.1404
GOTERM_BP_FAT	GO:0030335~positive regulation of cell migration	26	0.868114	0.0335272	1.54796e+107	2208	77	9658	1.47697	1	0.614587	47.5187
Annotation Cluster 25	Enrichment Score: 2.0909525167204186
Category	Term	Count	%	PValue	Genes	List Total	Pop Hits	Pop Total	Fold Enrichment	Bonferroni	Benjamini	FDR
GOTERM_BP_FAT	GO:0002526~acute inflammatory response	36	1.202	3.73801e-07	2053,2147,59307,1191,2335,197,5005,336,113174,1604,12,1051,727,725,722,7018,4153,2152,3075,629,5265,3570,90,5345,839,6291,716,2,718,1675,5004,2161,3426,710,4067,732	2208	69	9658	2.28214	0.0017542	0.000585076	0.000706681
GOTERM_BP_FAT	GO:0019724~B cell mediated immunity	20	0.66778	0.000224723	1.19143e+70	2208	38	9658	2.30215	0.652031	0.0314829	0.423993
GOTERM_BP_FAT	GO:0016064~immunoglobulin mediated immune response	19	0.634391	0.000503144	1.19143e+67	2208	37	9658	2.24616	0.905944	0.0534898	0.946939
GOTERM_BP_FAT	GO:0002541~activation of plasma proteins involved in acute inflammatory response	15	0.500835	0.000578257	1.19116e+51	2208	26	9658	2.52352	0.933918	0.059879	1.08757
GOTERM_BP_FAT	GO:0002449~lymphocyte mediated immunity	22	0.734558	0.00104191	1.19143e+78	2208	48	9658	2.00479	0.992527	0.0932863	1.95151
GOTERM_BP_FAT	GO:0002455~humoral immune response mediated by circulating immunoglobulin	13	0.434057	0.00123617	1.19116e+43	2208	22	9658	2.58469	0.997002	0.0985474	2.31133
GOTERM_BP_FAT	GO:0006956~complement activation	14	0.467446	0.00139462	1.19116e+47	2208	25	9658	2.44949	0.998577	0.10033	2.60391
GOTERM_BP_FAT	GO:0002460~adaptive immune response based on somatic recombination of immune receptors built from immunoglobulin superfamily domains	22	0.734558	0.00195017	5.97112e+78	2208	50	9658	1.9246	0.999896	0.118033	3.62319
GOTERM_BP_FAT	GO:0002250~adaptive immune response	22	0.734558	0.00195017	5.97112e+78	2208	50	9658	1.9246	0.999896	0.118033	3.62319
GOTERM_BP_FAT	GO:0051604~protein maturation	34	1.13523	0.00251157	1.19126e+129	2208	91	9658	1.63428	0.999993	0.140524	4.64294
GOTERM_BP_FAT	GO:0051605~protein maturation by peptide bond cleavage	25	0.834725	0.00277264	1.19126e+94	2208	61	9658	1.79266	0.999998	0.147036	5.11366
GOTERM_BP_FAT	GO:0006959~humoral immune response	20	0.66778	0.00293001	3.11012e+70	2208	45	9658	1.94404	0.999999	0.151323	5.39635
GOTERM_BP_FAT	GO:0002443~leukocyte mediated immunity	24	0.801336	0.00492985	3.57012e+86	2208	60	9658	1.74964	1	0.216783	8.91991
GOTERM_BP_FAT	GO:0016485~protein processing	30	1.00167	0.00666509	1.19126e+114	2208	82	9658	1.60028	1	0.262846	11.8762
GOTERM_BP_FAT	GO:0006958~complement activation, classical pathway	11	0.367279	0.00713337	7.16719e+36	2208	20	9658	2.40575	1	0.276259	12.6583
SP_PIR_KEYWORDS	complement pathway	11	0.367279	0.00928491	7.16719e+36	2957	21	13223	2.34235	0.999496	0.200149	13.3693
GOTERM_BP_FAT	GO:0002253~activation of immune response	21	0.701169	0.0196676	1.19188e+75	2208	56	9658	1.64029	1	0.491394	31.3073
SP_PIR_KEYWORDS	complement alternate pathway	6	0.200334	0.0310783	7.18727e+19	2957	9	13223	2.98117	1	0.401892	38.4751
GOTERM_BP_FAT	GO:0006957~complement activation, alternative pathway	6	0.200334	0.0339879	7.18727e+19	2208	9	9658	2.91606	1	0.617508	47.9896
GOTERM_BP_FAT	GO:0002252~immune effector process	29	0.96828	0.0435848	1.19147e+104	2208	90	9658	1.40943	1	0.667677	56.9359
SP_PIR_KEYWORDS	innate immunity	18	0.601002	0.0563287	1.19116e+67	2957	52	13223	1.54792	1	0.538681	59.0158
SP_PIR_KEYWORDS	immune response	35	1.16861	0.17319	1.19116e+143	2957	130	13223	1.20394	1	0.767866	94.6385
GOTERM_BP_FAT	GO:0048584~positive regulation of response to stimulus	41	1.36895	0.200779	3.26379e+153	2208	154	9658	1.16453	1	0.945851	98.555
BIOCARTA	h_compPathway:Complement Pathway	6	0.200334	0.207133	7.16719e+19	290	13	1152	1.83342	1	0.998057	95.2637
GOTERM_BP_FAT	GO:0050778~positive regulation of immune response	24	0.801336	0.266401	3.26312e+86	2208	88	9658	1.19293	1	0.970748	99.7139
BIOCARTA	h_alternativePathway:Alternative Complement Pathway	4	0.133556	0.323355	7187271675629	290	8	1152	1.98621	1	0.998594	99.41
GOTERM_BP_FAT	GO:0045087~innate immune response	23	0.767947	0.332186	6.62259e+85	2208	87	9658	1.15637	1	0.984797	99.9516
GOTERM_BP_FAT	GO:0002684~positive regulation of immune system process	37	1.23539	0.364432	3.26312e+133	2208	148	9658	1.09352	1	0.988364	99.981

## Sheet: R1 to R1.09
Annotation Cluster 1	Enrichment Score: 11.321456306054165
Category	Term	Count	%	PValue	Genes	List Total	Pop Hits	Pop Total	Fold Enrichment	Bonferroni	Benjamini	FDR
SP_PIR_KEYWORDS	dna replication	42	2.50597	7.25798e-17	5.66528e+179	1656	81	13223	4.14032	7.34968e-14	7.34968e-14	1.66533e-13
GOTERM_BP_FAT	GO:0006260~DNA replication	61	3.63962	2.48109e-13	8.88331e+261	1272	173	9658	2.67722	9.03955e-10	9.03955e-10	4.56468e-10
GOTERM_BP_FAT	GO:0006259~DNA metabolic process	108	6.44391	1.04023e-10	8883,3148,63922,54107,7298,8318,5378,10926,2956,10714,65057,7486,675,23649,672,91875,25788,10721,10912,56647,4221,8208,9156,55559,8438,55215,51022,84296,1453,84126,5557,2071,1786,57697,5422,286826,7520,2175,2177,51514,4173,5427,23594,4172,4175,5424,5426,4436,1111,1063,4171,55388,990,2968,27000,55135,1763,10856,641,5984,55339,5985,29893,7398,580,64785,5981,5980,5983,5982,1854,54962,55704,23411,566…	1272	444	9658	1.84689	3.78955e-07	1.89478e-07	1.91361e-07
GOTERM_BP_FAT	GO:0006261~DNA-dependent DNA replication	24	1.43198	2.76432e-07	7.48654e+96	1272	57	9658	3.19695	0.00100653	0.000100699	0.000508524
Annotation Cluster 2	Enrichment Score: 7.076771831358004
Category	Term	Count	%	PValue	Genes	List Total	Pop Hits	Pop Total	Fold Enrichment	Bonferroni	Benjamini	FDR
GOTERM_BP_FAT	GO:0000279~M phase	77	4.59427	1.91471e-09	10403,51530,5536,54908,9700,1663,5017,10615,29893,2956,259266,79003,56992,675,3306,7280,23212,54892,11243,10534,25936,25788,9735,11339,121441,54962,9585,55329,10910,9787,29882,55320,4085,9156,10726,55559,10051,8438,11130,79723,8697,51203,8091,23481,23354,3070,348995,84057,2175,7272,2177,93323,10592,81930,3833,1111,7465,1063,26271,79075,1062,151648,3980,5902,899,1639,10459,83540,4627,8914,990,4288…	1272	293	9658	1.99537	6.97527e-06	2.32509e-06	3.52232e-06
SP_PIR_KEYWORDS	cell cycle	95	5.66826	3.22841e-09	8883,7844,63922,10403,51530,8318,55183,54908,57132,90480,1663,10926,1389,10615,220042,259266,79003,11243,54892,672,5603,10534,25936,9735,10628,54962,11339,121441,9585,91768,56647,29882,9787,8208,55320,4085,10051,55559,10726,55215,11130,79723,51652,8697,6300,51203,1029,8091,163786,23354,3070,25909,388610,144455,1031,348995,4678,286826,2177,93323,9994,4172,4175,5300,10036,79733,11064,10592,3833,111…	1656	413	13223	1.83672	2.1372e-06	1.0686e-06	4.83226e-06
GOTERM_BP_FAT	GO:0000280~nuclear division	57	3.40095	8.4646e-09	1.04035e+267	1272	197	9658	2.19689	3.08361e-05	7.7091e-06	1.55715e-05
GOTERM_BP_FAT	GO:0007067~mitosis	57	3.40095	8.4646e-09	1.04035e+267	1272	197	9658	2.19689	3.08361e-05	7.7091e-06	1.55715e-05
GOTERM_BP_FAT	GO:0007049~cell cycle	143	8.53222	8.59815e-09	3087,8883,63922,10403,55183,8318,5536,54908,10926,5017,1389,10615,7164,2956,220042,79003,56992,7280,675,672,54892,10534,55857,1326,25788,5036,9735,10628,11339,91768,56647,83667,10910,4221,3400,8208,55559,9156,10726,8438,55215,11130,6300,51203,23481,163786,10083,388610,144455,5422,286826,2175,2177,9994,4172,4175,5424,10592,116985,6277,5426,1111,3833,4436,1063,1062,26271,151648,4171,899,1639,83540,…	1272	687	9658	1.58045	3.13226e-05	6.26459e-06	1.58172e-05
GOTERM_BP_FAT	GO:0022403~cell cycle phase	89	5.31026	1.02511e-08	10403,51530,5536,54908,9700,641,1663,5017,10926,10615,7164,29893,2956,259266,79003,56992,675,7280,3306,23212,54892,11243,10534,25936,25788,9735,11339,121441,54962,9585,55329,10910,3400,29882,9787,55320,4085,9156,55559,10726,10051,8438,11130,79723,8697,51203,1029,8091,23481,23354,3070,10083,1031,348995,84057,5422,2175,2177,7272,93323,5424,10592,5426,81930,3833,1111,7465,1063,26271,79075,1062,15164…	1272	370	9658	1.82637	3.7344e-05	6.22409e-06	1.88579e-05
GOTERM_BP_FAT	GO:0000087~M phase of mitotic cell cycle	57	3.40095	1.52857e-08	1.04035e+267	1272	200	9658	2.16394	5.56841e-05	7.95506e-06	2.81196e-05
GOTERM_BP_FAT	GO:0048285~organelle fission	57	3.40095	3.27201e-08	1.04035e+267	1272	204	9658	2.12151	0.000119192	1.48998e-05	6.01921e-05
GOTERM_BP_FAT	GO:0022402~cell cycle process	108	6.44391	2.07208e-07	10403,54908,5536,10926,5017,10615,7164,2956,220042,79003,56992,675,7280,672,54892,10534,55857,25788,5036,9735,11339,10910,83667,3400,4221,55559,9156,10726,8438,11130,6300,51203,163786,23481,10083,5422,2175,2177,5424,10592,116985,5426,4436,1111,3833,1063,26271,1062,151648,899,1639,83540,990,4627,23332,54801,27000,51530,9700,641,1663,29893,259266,3306,580,11243,23212,5707,25936,5702,54962,121441,57…	1272	506	9658	1.62059	0.000754573	8.38695e-05	0.00038118
SP_PIR_KEYWORDS	mitosis	46	2.74463	3.99779e-07	1.11309e+218	1656	168	13223	2.18634	0.000264619	6.61613e-05	0.000598385
GOTERM_BP_FAT	GO:0007059~chromosome segregation	27	1.61098	2.05992e-06	1.11309e+125	1272	76	9658	2.69743	0.00747619	0.000577086	0.00378937
SP_PIR_KEYWORDS	cell division	56	3.34129	4.82395e-06	7.8441e+267	1656	240	13223	1.86314	0.00318837	0.000532102	0.00722021
GOTERM_BP_FAT	GO:0051301~cell division	62	3.69928	6.04426e-06	7.70478e+290	1272	265	9658	1.77642	0.0217786	0.00146688	0.0111185
GOTERM_BP_FAT	GO:0000278~mitotic cell cycle	73	4.35561	8.66554e-06	10403,51530,5536,54908,641,9700,1663,10926,10615,7164,259266,79003,56992,7280,23212,54892,11243,5707,10534,25936,5702,9735,121441,11339,54962,9585,10910,3400,9787,29882,55320,4085,10726,55559,10051,11130,8697,51203,1029,8091,23481,23354,3070,10083,1031,348995,5422,7272,93323,5424,5426,81930,10592,3833,1111,7465,1063,26271,79075,1062,151648,5292,899,1639,10459,83540,8914,990,23047,10783,23332,5480…	1272	332	9658	1.66949	0.0310756	0.00175228	0.01594
Annotation Cluster 3	Enrichment Score: 6.407506042154273
Category	Term	Count	%	PValue	Genes	List Total	Pop Hits	Pop Total	Fold Enrichment	Bonferroni	Benjamini	FDR
GOTERM_CC_FAT	GO:0044427~chromosomal part	83	4.95227	1.54033e-09	6597,10403,1105,55183,54908,641,387103,79682,378708,10615,5984,55506,5985,2956,65057,10714,8365,8971,8367,79003,8349,23649,5926,11243,5981,3398,25936,5983,5982,1385,57122,9735,54962,11339,7175,10910,4221,9314,79019,8352,55320,4085,10051,55723,11130,79723,5557,5663,8091,4734,257218,3070,23421,25909,348995,5422,7520,4094,29974,7112,23594,4172,10592,64105,1111,1063,79075,1062,151648,7157,1060,4171,8…	1172	321	8798	1.94102	8.68745e-07	8.68745e-07	2.25568e-06
GOTERM_CC_FAT	GO:0005694~chromosome	95	5.66826	1.6446e-09	3148,6597,10403,1105,55183,54908,641,387103,79682,378708,10615,5984,55506,5985,2956,65057,10714,8365,8971,8367,79003,8349,23649,5926,23212,11243,672,5981,3398,25936,5983,5982,1385,57122,9735,54962,11339,7175,10910,4221,9314,79019,8352,55320,4085,10051,55215,55723,11130,79723,5557,5663,8091,4734,23481,257218,3070,8815,23421,25909,348995,84365,5422,7520,2177,4094,29974,9810,7112,23594,4172,8899,796…	1172	387	8798	1.84276	9.27553e-07	4.63777e-07	2.40837e-06
GOTERM_CC_FAT	GO:0000775~chromosome, centromeric region	35	2.08831	4.30496e-06	1.11308e+168	1172	116	8798	2.26499	0.00242506	0.000809007	0.00630406
GOTERM_CC_FAT	GO:0000785~chromatin	34	2.02864	0.00214948	5.57238e+152	1172	150	8798	1.70155	0.702877	0.0652001	3.10199
Annotation Cluster 4	Enrichment Score: 5.463193342845748
Category	Term	Count	%	PValue	Genes	List Total	Pop Hits	Pop Total	Fold Enrichment	Bonferroni	Benjamini	FDR
GOTERM_BP_FAT	GO:0006259~DNA metabolic process	108	6.44391	1.04023e-10	8883,3148,63922,54107,7298,8318,5378,10926,2956,10714,65057,7486,675,23649,672,91875,25788,10721,10912,56647,4221,8208,9156,55559,8438,55215,51022,84296,1453,84126,5557,2071,1786,57697,5422,286826,7520,2175,2177,51514,4173,5427,23594,4172,4175,5424,5426,4436,1111,1063,4171,55388,990,2968,27000,55135,1763,10856,641,5984,55339,5985,29893,7398,580,64785,5981,5980,5983,5982,1854,54962,55704,23411,566…	1272	444	9658	1.84689	3.78955e-07	1.89478e-07	1.91361e-07
GOTERM_BP_FAT	GO:0006281~DNA repair	62	3.69928	1.59254e-06	3.14818e+265	1272	255	9658	1.84608	0.00578482	0.000483351	0.0029296
GOTERM_BP_FAT	GO:0006974~response to DNA damage stimulus	74	4.41527	7.01511e-06	8883,3148,1763,10856,7298,55183,5378,641,5984,5985,55339,2956,65057,10714,7398,7486,675,580,672,5981,5980,5983,5982,91875,25788,79915,54962,10721,57060,10912,56647,4221,8208,23411,9156,55559,55215,8438,1453,6300,84126,5663,2071,57697,257218,25842,28996,7374,5422,7520,2175,10635,2177,51514,5427,10038,10036,5424,79677,5426,4436,55247,1111,3980,7157,4913,1022,8914,3978,64858,9131,2968,142,64859	1272	336	9658	1.67222	0.0252324	0.00159598	0.0129043
GOTERM_BP_FAT	GO:0033554~cellular response to stress	100	5.96659	1.49598e-05	8883,3148,255738,7298,55183,5378,337,538,2956,10714,65057,7486,4217,675,4214,672,25788,91875,79915,116496,10721,10912,56647,4221,8208,9156,55559,22797,8438,55215,51022,1453,6300,84126,2071,57697,28996,22926,5422,7520,2175,2177,51514,5427,29969,5424,5426,4436,1111,146760,2968,11221,1763,10856,641,5984,55339,5985,7398,580,5981,5980,5983,5982,1660,54962,57060,440,23411,133,10045,5663,4734,3992,25721…	1272	502	9658	1.5125	0.0530407	0.00286427	0.0275167
SP_PIR_KEYWORDS	DNA damage	43	2.56563	8.80057e-05	5.52158e+186	1656	186	13223	1.84597	0.0565976	0.00645269	0.131645
SP_PIR_KEYWORDS	dna repair	37	2.20764	0.0010868	5.52158e+157	1656	171	13223	1.72773	0.513175	0.0582238	1.61442
Annotation Cluster 5	Enrichment Score: 4.846040945319606
Category	Term	Count	%	PValue	Genes	List Total	Pop Hits	Pop Total	Fold Enrichment	Bonferroni	Benjamini	FDR
GOTERM_CC_FAT	GO:0000775~chromosome, centromeric region	35	2.08831	4.30496e-06	1.11308e+168	1172	116	8798	2.26499	0.00242506	0.000809007	0.00630406
SP_PIR_KEYWORDS	kinetochore	22	1.31265	4.45433e-06	1.11301e+106	1656	59	13223	2.97742	0.00294443	0.000589581	0.006667
GOTERM_CC_FAT	GO:0000777~condensed chromosome kinetochore	21	1.25298	1.2809e-05	1.11301e+100	1172	55	8798	2.86624	0.00719827	0.00180444	0.018756
GOTERM_CC_FAT	GO:0000776~kinetochore	25	1.49165	1.71944e-05	1.11306e+117	1172	74	8798	2.53609	0.00965086	0.00161498	0.0251768
GOTERM_CC_FAT	GO:0000779~condensed chromosome, centromeric region	22	1.31265	3.60378e-05	1.11301e+106	1172	63	8798	2.62143	0.0201205	0.00289946	0.0527613
GOTERM_CC_FAT	GO:0000793~condensed chromosome	33	1.96897	5.51242e-05	1.11303e+153	1172	119	8798	2.08172	0.0306126	0.00387882	0.0806944
Annotation Cluster 6	Enrichment Score: 3.6427074770584293
Category	Term	Count	%	PValue	Genes	List Total	Pop Hits	Pop Total	Fold Enrichment	Bonferroni	Benjamini	FDR
GOTERM_CC_FAT	GO:0005654~nucleoplasm	147	8.77088	1.4069e-05	2146,26168,51575,3148,10891,8318,10482,27063,2648,11329,10926,10714,65057,51422,7486,675,55759,23649,672,4116,1385,11339,10721,7175,7343,4221,10622,5451,79612,26354,8295,8208,79595,6604,55215,9984,51497,84126,5557,2071,8106,9360,23481,23421,25909,28996,144455,4802,9879,22926,4801,5422,286826,7520,2177,55660,1846,4173,23594,5427,4172,4175,3837,5424,5426,1111,9759,26271,4171,55388,990,26747,10594,7…	1172	794	8798	1.3898	0.00790356	0.00158573	0.0206008
GOTERM_CC_FAT	GO:0031981~nuclear lumen	217	12.9475	9.94364e-05	56342,51575,10891,8318,10482,27063,11329,4212,10714,65057,7486,23649,55759,55758,85865,56919,4116,11339,10721,7175,7343,10622,4221,79612,8208,6604,55215,11340,51491,9984,51497,64073,8106,54475,92140,25909,144455,9879,22926,55660,1846,3837,1063,55388,10594,2968,55135,10856,7456,25896,8464,55131,8365,81887,439,8367,705,84864,7398,55127,5926,5411,64434,23160,55269,7443,9584,9585,25885,3248,9314,2302…	1172	1296	8798	1.25693	0.0545412	0.00621228	0.145517
GOTERM_CC_FAT	GO:0070013~intracellular organelle lumen	260	15.5131	0.000111331	56342,51575,10891,35,36,8318,337,10482,27063,11329,4212,65057,10714,3712,7486,55759,23649,55758,85865,56919,4116,63931,11339,10721,7175,7343,4221,10622,79612,8208,56922,6604,55215,11340,51491,64073,9984,51497,8106,54475,92140,25909,144455,121506,9879,22926,55660,7184,1846,3837,22907,189,1063,55388,10594,2968,9601,55135,10856,4758,7456,25896,8464,55131,8365,81887,439,8367,708,7398,705,84864,92259,…	1172	1595	8798	1.22368	0.0608633	0.00625975	0.162911
GOTERM_CC_FAT	GO:0031974~membrane-enclosed lumen	268	15.9905	0.000172566	56342,51575,10891,35,36,8318,3283,337,10482,27063,7060,11329,3482,4212,65057,10714,3712,7486,55759,23649,55758,85865,56919,4116,63931,10628,11339,10721,7175,7343,4221,10622,79612,8208,56922,6604,55215,11340,51491,64073,9984,51497,8106,54475,92140,25909,144455,121506,9879,22926,55660,7184,1846,3837,22907,189,1063,55388,10594,2968,9601,55135,10856,4758,7456,25896,8464,55131,8365,81887,439,8367,708,…	1172	1661	8798	1.21122	0.0927483	0.00880964	0.25241
GOTERM_CC_FAT	GO:0043233~organelle lumen	263	15.6921	0.000183929	56342,51575,10891,35,36,8318,337,10482,27063,7060,11329,4212,65057,10714,3712,7486,55759,23649,55758,85865,56919,4116,63931,11339,10721,7175,7343,4221,10622,79612,8208,56922,6604,55215,11340,51491,64073,9984,51497,8106,54475,92140,25909,144455,121506,9879,22926,55660,7184,1846,3837,22907,189,1063,55388,10594,2968,9601,55135,10856,4758,7456,25896,8464,55131,8365,81887,439,8367,708,7398,705,84864,9…	1172	1629	8798	1.21197	0.0985451	0.00860817	0.26901
GOTERM_CC_FAT	GO:0005730~nucleolus	101	6.02625	0.0281662	686,26168,56342,51575,3148,10799,4212,7486,64745,26155,55759,85865,55758,56919,5036,7343,875,4931,26354,5930,4839,83759,11340,51491,10528,64073,2624,51203,116461,8106,84128,23481,54475,92140,5422,55003,55074,4173,4172,6275,10514,29969,51602,64425,6675,283989,26747,84916,340252,7704,7456,641,1663,10199,55131,56259,439,81887,84864,705,6662,55127,64434,5411,23212,9816,23160,1660,55269,7443,3187,9585…	1172	628	8798	1.20731	1	0.461926	34.1894
Annotation Cluster 7	Enrichment Score: 3.4861776311523505
Category	Term	Count	%	PValue	Genes	List Total	Pop Hits	Pop Total	Fold Enrichment	Bonferroni	Benjamini	FDR
KEGG_PATHWAY	hsa03030:DNA replication	20	1.19332	5.80296e-09	4.17354e+83	472	35	3618	4.38015	1.08515e-06	1.08515e-06	7.19331e-06
GOTERM_BP_FAT	GO:0006297~nucleotide-excision repair, DNA gap filling	10	0.596659	5.51947e-05	5.42754e+40	1272	16	9658	4.74548	0.182153	0.00952954	0.101488
KEGG_PATHWAY	hsa03430:Mismatch repair	11	0.656325	0.000117373	5.4246e+44	472	21	3618	4.01513	0.021711	0.010915	0.145398
GOTERM_BP_FAT	GO:0006289~nucleotide-excision repair	17	1.01432	0.000200938	5.42768e+68	1272	47	9658	2.74632	0.519097	0.028859	0.369001
GOTERM_CC_FAT	GO:0005657~replication fork	13	0.775656	0.00035915	4.17224e+52	1172	31	8798	3.14802	0.183393	0.0154636	0.524658
KEGG_PATHWAY	hsa03420:Nucleotide excision repair	14	0.835322	0.000847765	5.42754e+57	472	39	3618	2.75163	0.146662	0.0312221	1.04582
GOTERM_MF_FAT	GO:0033170~protein-DNA loading ATPase activity	5	0.298329	0.00126025	5.9846e+19	1195	5	9211	7.70795	0.804175	0.334777	2.0366
GOTERM_MF_FAT	GO:0003689~DNA clamp loader activity	5	0.298329	0.00126025	5.9846e+19	1195	5	9211	7.70795	0.804175	0.334777	2.0366
GOTERM_CC_FAT	GO:0005663~DNA replication factor C complex	5	0.298329	0.00374644	5.9846e+19	1172	6	8798	6.25569	0.879603	0.100439	5.34831
PIR_SUPERFAMILY	PIRSF004274:phage T4 DNA polymerase accessory protein 44	4	0.238663	0.00743386	5.9846e+15	642	4	5036	7.84424	0.995108	0.995108	10.6673
INTERPRO	IPR013748:Replication factor C	3	0.178998	0.0441132	598459855982	1491	3	11754	7.8833	1	0.964225	54.0983
Annotation Cluster 8	Enrichment Score: 2.918775545760992
Category	Term	Count	%	PValue	Genes	List Total	Pop Hits	Pop Total	Fold Enrichment	Bonferroni	Benjamini	FDR
GOTERM_BP_FAT	GO:0033043~regulation of organelle organization	45	2.68496	2.53328e-05	1.54797e+202	1272	180	9658	1.89819	0.0881581	0.0046038	0.0465922
GOTERM_BP_FAT	GO:0010638~positive regulation of organelle organization	18	1.07399	0.00591475	1.54796e+81	1272	68	9658	2.00985	1	0.395039	10.3387
GOTERM_BP_FAT	GO:0051130~positive regulation of cellular component organization	31	1.84964	0.0116964	1.54797e+139	1272	150	9658	1.56917	1	0.534842	19.4616
Annotation Cluster 9	Enrichment Score: 2.7444496798497586
Category	Term	Count	%	PValue	Genes	List Total	Pop Hits	Pop Total	Fold Enrichment	Bonferroni	Benjamini	FDR
GOTERM_BP_FAT	GO:0010564~regulation of cell cycle process	30	1.78998	7.31621e-06	8.69766e+125	1272	95	9658	2.39772	0.026301	0.0015666	0.0134581
GOTERM_BP_FAT	GO:0051783~regulation of nuclear division	17	1.01432	0.000111788	5.30087e+72	1272	45	9658	2.86838	0.334533	0.0183418	0.205446
GOTERM_BP_FAT	GO:0007088~regulation of mitosis	17	1.01432	0.000111788	5.30087e+72	1272	45	9658	2.86838	0.334533	0.0183418	0.205446
GOTERM_BP_FAT	GO:0030071~regulation of mitotic metaphase/anaphase transition	11	0.656325	0.000133618	8.6971e+46	1272	21	9658	3.97716	0.385412	0.020943	0.24552
GOTERM_BP_FAT	GO:0007346~regulation of mitotic cell cycle	34	2.02864	0.000186461	1.11309e+140	1272	133	9658	1.94101	0.493049	0.027909	0.342459
GOTERM_BP_FAT	GO:0051726~regulation of cell cycle	60	3.57995	0.000381633	8.88366e+250	1272	291	9658	1.56552	0.751063	0.0468187	0.69973
GOTERM_BP_FAT	GO:0010948~negative regulation of cell cycle process	9	0.536993	0.00509828	1.04597e+35	1272	22	9658	3.10613	1	0.372187	8.97429
GOTERM_BP_FAT	GO:0045841~negative regulation of mitotic metaphase/anaphase transition	6	0.357995	0.00910323	1.04597e+24	1272	11	9658	4.14151	1	0.493331	15.4841
GOTERM_BP_FAT	GO:0007094~mitotic cell cycle spindle assembly checkpoint	6	0.357995	0.00910323	1.04597e+24	1272	11	9658	4.14151	1	0.493331	15.4841
GOTERM_BP_FAT	GO:0031577~spindle checkpoint	6	0.357995	0.0139372	1.04597e+24	1272	12	9658	3.79638	1	0.573512	22.7554
GOTERM_BP_FAT	GO:0045839~negative regulation of mitosis	6	0.357995	0.0139372	1.04597e+24	1272	12	9658	3.79638	1	0.573512	22.7554
GOTERM_BP_FAT	GO:0051784~negative regulation of nuclear division	6	0.357995	0.0139372	1.04597e+24	1272	12	9658	3.79638	1	0.573512	22.7554
GOTERM_BP_FAT	GO:0007093~mitotic cell cycle checkpoint	12	0.71599	0.0144656	1.11309e+50	1272	41	9658	2.22227	1	0.563699	23.5134
GOTERM_BP_FAT	GO:0045786~negative regulation of cell cycle	13	0.775656	0.262937	6.5971e+51	1272	74	9658	1.33386	1	0.984914	99.6347
Annotation Cluster 10	Enrichment Score: 2.639759566112553
Category	Term	Count	%	PValue	Genes	List Total	Pop Hits	Pop Total	Fold Enrichment	Bonferroni	Benjamini	FDR
GOTERM_BP_FAT	GO:0033043~regulation of organelle organization	45	2.68496	2.53328e-05	1.54797e+202	1272	180	9658	1.89819	0.0881581	0.0046038	0.0465922
GOTERM_BP_FAT	GO:0010639~negative regulation of organelle organization	21	1.25298	0.000261563	6.62251e+89	1272	67	9658	2.37982	0.614417	0.0359902	0.48008
GOTERM_BP_FAT	GO:0051493~regulation of cytoskeleton organization	25	1.49165	0.0110653	1.54797e+116	1272	113	9658	1.67982	1	0.521459	18.5103
GOTERM_BP_FAT	GO:0051129~negative regulation of cellular component organization	25	1.49165	0.0204103	5.08536e+106	1272	119	9658	1.59512	1	0.658088	31.5697
GOTERM_BP_FAT	GO:0051494~negative regulation of cytoskeleton organization	11	0.656325	0.0422792	3.57509e+47	1272	42	9658	1.98858	1	0.81254	54.828
Annotation Cluster 11	Enrichment Score: 2.4792659708849794
Category	Term	Count	%	PValue	Genes	List Total	Pop Hits	Pop Total	Fold Enrichment	Bonferroni	Benjamini	FDR
GOTERM_MF_FAT	GO:0004386~helicase activity	33	1.96897	0.000127964	7.96658e+147	1195	127	9211	2.00285	0.152503	0.0794038	0.208591
SP_PIR_KEYWORDS	helicase	31	1.84964	0.00018054	7.96658e+139	1656	122	13223	2.02895	0.112661	0.0118817	0.26989
GOTERM_MF_FAT	GO:0042623~ATPase activity, coupled	48	2.86396	0.000790652	7.96652e+205	1195	229	9211	1.61564	0.640383	0.288874	1.28231
SMART	SM00487:DEXDc	25	1.49165	0.00107355	8.4388e+112	807	101	6501	1.994	0.319235	0.319235	1.46319
INTERPRO	IPR014001:DEAD-like helicase, N-terminal	25	1.49165	0.00152517	8.4388e+112	1491	101	11754	1.95131	0.957359	0.793503	2.59996
SMART	SM00490:HELICc	24	1.43198	0.00161577	8.43875e+108	807	98	6501	1.97284	0.439494	0.25133	2.19464
UP_SEQ_FEATURE	domain:Helicase C-terminal	24	1.43198	0.0016633	8.43875e+107	1655	97	13210	1.9749	0.998717	0.810749	3.04619
GOTERM_MF_FAT	GO:0003678~DNA helicase activity	13	0.775656	0.0017486	4.17375e+53	1195	37	9211	2.7082	0.895954	0.31419	2.81528
GOTERM_MF_FAT	GO:0016887~ATPase activity	53	3.16229	0.00209237	6.59789e+226	1195	271	9211	1.50746	0.933348	0.320838	3.35992
UP_SEQ_FEATURE	domain:Helicase ATP-binding	24	1.43198	0.00254043	8.43875e+105	1655	100	13210	1.91565	0.999962	0.869311	4.61702
INTERPRO	IPR014021:Helicase, superfamily 1 and 2, ATP-binding	24	1.43198	0.00258648	8.43875e+106	1491	99	11754	1.9111	0.995267	0.590245	4.37145
INTERPRO	IPR001650:DNA/RNA helicase, C-terminal	24	1.43198	0.00258648	8.43875e+108	1491	99	11754	1.9111	0.995267	0.590245	4.37145
GOTERM_MF_FAT	GO:0004003~ATP-dependent DNA helicase activity	9	0.536993	0.0046378	7.48617e+35	1195	22	9211	3.15325	0.997547	0.394006	7.30449
GOTERM_MF_FAT	GO:0008026~ATP-dependent helicase activity	21	1.25298	0.00600645	7.4868e+92	1195	86	9211	1.88217	0.999586	0.405073	9.36246
GOTERM_MF_FAT	GO:0070035~purine NTP-dependent helicase activity	21	1.25298	0.00600645	7.4868e+92	1195	86	9211	1.88217	0.999586	0.405073	9.36246
INTERPRO	IPR002464:DNA/RNA helicase, ATP-dependent, DEAH-box type, conserved site	11	0.656325	0.00769068	7.4868e+48	1491	34	11754	2.55048	1	0.765602	12.4753
UP_SEQ_FEATURE	short sequence motif:DEAH box	11	0.656325	0.0191708	7.4868e+49	1655	39	13210	2.2513	1	0.998423	30.2128
INTERPRO	IPR011709:Region of unknown function DUF1605	6	0.357995	0.0427526	7.96656e+28	1491	16	11754	2.95624	1	0.964739	52.9575
INTERPRO	IPR007502:Helicase-associated region	6	0.357995	0.0544465	7.96656e+28	1491	17	11754	2.78234	1	0.978876	61.9497
INTERPRO	IPR011545:DNA/RNA helicase, DEAD/DEAH box type, N-terminal	12	0.71599	0.0905322	7.48611e+52	1491	56	11754	1.68928	1	0.992581	80.56
Annotation Cluster 12	Enrichment Score: 2.47325001072163
Category	Term	Count	%	PValue	Genes	List Total	Pop Hits	Pop Total	Fold Enrichment	Bonferroni	Benjamini	FDR
GOTERM_BP_FAT	GO:0000070~mitotic sister chromatid segregation	17	1.01432	1.57741e-06	1.11309e+77	1272	34	9658	3.79638	0.00573003	0.000522273	0.00290177
GOTERM_BP_FAT	GO:0000819~sister chromatid segregation	17	1.01432	2.55269e-06	1.11309e+77	1272	35	9658	3.68792	0.00925635	0.000664026	0.00469584
GOTERM_BP_FAT	GO:0050000~chromosome localization	7	0.417661	0.0089136	8.69723e+30	1272	15	9658	3.54329	1	0.493149	15.1861
GOTERM_BP_FAT	GO:0051303~establishment of chromosome localization	7	0.417661	0.0089136	8.69723e+30	1272	15	9658	3.54329	1	0.493149	15.1861
GOTERM_BP_FAT	GO:0051310~metaphase plate congression	6	0.357995	0.00910323	8.69723e+26	1272	11	9658	4.14151	1	0.493331	15.4841
GOTERM_BP_FAT	GO:0007080~mitotic metaphase plate congression	5	0.298329	0.0217401	8.69723e+22	1272	9	9658	4.2182	1	0.666091	33.2585
GOTERM_BP_FAT	GO:0051656~establishment of organelle localization	15	0.894988	0.0320086	8.69723e+65	1272	63	9658	1.8078	1	0.75199	45.0343
GOTERM_BP_FAT	GO:0051640~organelle localization	17	1.01432	0.079565	8.69723e+76	1272	84	9658	1.53663	1	0.900304	78.2422
GOTERM_CC_FAT	GO:0000940~outer kinetochore of condensed chromosome	3	0.178998	0.341395	1063106254908	1172	9	8798	2.50228	1	0.93329	99.7792
Annotation Cluster 13	Enrichment Score: 2.375495271579204
Category	Term	Count	%	PValue	Genes	List Total	Pop Hits	Pop Total	Fold Enrichment	Bonferroni	Benjamini	FDR
GOTERM_CC_FAT	GO:0043228~non-membrane-bounded organelle	316	18.8544	0.000371613	56342,51575,8318,3866,23271,10615,80206,4212,2956,65057,10714,7486,84080,27072,55759,23649,4214,55758,85865,56919,55857,63931,89846,11339,7175,7343,4221,85477,643224,5216,10726,55559,55215,125113,55723,11340,51491,64073,2317,8106,163786,54475,92140,10083,25909,57619,4636,25900,4094,22920,10592,3833,22907,1063,1062,80854,1060,80205,3936,4627,50853,6597,7456,9700,8842,378708,55506,30968,55131,8365,…	1172	2018	8798	1.1755	0.189115	0.0148619	0.542818
GOTERM_CC_FAT	GO:0043232~intracellular non-membrane-bounded organelle	316	18.8544	0.000371613	56342,51575,8318,3866,23271,10615,80206,4212,2956,65057,10714,7486,84080,27072,55759,23649,4214,55758,85865,56919,55857,63931,89846,11339,7175,7343,4221,85477,643224,5216,10726,55559,55215,125113,55723,11340,51491,64073,2317,8106,163786,54475,92140,10083,25909,57619,4636,25900,4094,22920,10592,3833,22907,1063,1062,80854,1060,80205,3936,4627,50853,6597,7456,9700,8842,378708,55506,30968,55131,8365,…	1172	2018	8798	1.1755	0.189115	0.0148619	0.542818
GOTERM_CC_FAT	GO:0005856~cytoskeleton	132	7.87589	0.541169	154796,9455,55183,8318,5025,54908,9928,3866,23271,10615,80206,23077,145389,7486,56992,27072,84080,7280,675,84131,4214,672,55857,158135,57669,9735,8682,89846,4830,9050,85477,10810,643224,5216,55559,9053,10726,51710,125113,26064,51203,2317,10671,22995,84129,163786,11034,28996,57619,4636,25900,22920,11135,4172,1111,3833,1063,1062,26271,7429,7430,3936,23433,6676,1639,990,4627,397,83543,23332,54801,99…	1172	989	8798	1.00192	1	0.977357	99.9989
Annotation Cluster 14	Enrichment Score: 1.9250007538721305
Category	Term	Count	%	PValue	Genes	List Total	Pop Hits	Pop Total	Fold Enrichment	Bonferroni	Benjamini	FDR
INTERPRO	IPR003959:ATPase, AAA-type, core	14	0.835322	0.00191275	7.91706e+60	1491	43	11754	2.56666	0.980888	0.628185	3.25044
SMART	SM00382:AAA	23	1.37232	0.0262855	1.02574e+98	807	116	6501	1.59726	0.999928	0.69639	30.6174
INTERPRO	IPR003593:ATPase, AAA+ type, core	23	1.37232	0.0333906	1.02574e+98	1491	116	11754	1.56307	1	0.95886	44.353

## Sheet: R1 to R1.10
Annotation Cluster 1	Enrichment Score: 4.118270320161089
Category	Term	Count	%	PValue	Genes	List Total	Pop Hits	Pop Total	Fold Enrichment	Bonferroni	Benjamini	FDR
GOTERM_CC_FAT	GO:0005576~extracellular region	55	16.2242	5.96933e-06	3627,6590,347862,54097,23467,80310,115908,5986,6866,4153,5444,5328,976,4036,2717,4982,24147,3547,4973,2,3956,3915,7076,9965,1370,9948,136227,114902,51205,760,51599,866,960,7474,12,6374,7423,722,23324,1462,1363,1298,2690,54749,2243,5340,716,118427,3162,4060,6035,51144,9518,83729,135228	234	1119	8798	1.84799	0.0014793	0.0014793	0.00774466
GOTERM_CC_FAT	GO:0044421~extracellular region part	33	9.73451	5.56849e-05	136227,3627,760,51599,866,960,7474,54097,23467,115908,6866,6374,4153,1462,5444,976,4036,1298,2690,4982,2243,24147,5340,2,118427,3162,3956,3915,4060,9518,51144,7076,135228	234	580	8798	2.13921	0.0137153	0.00688134	0.0722245
GOTERM_CC_FAT	GO:0005615~extracellular space	23	6.78466	0.001329	976,3627,760,4036,51599,2690,866,7474,2243,24147,5340,54097,23467,2,118427,3162,3956,6374,6866,9518,4153,135228,5444	234	412	8798	2.09893	0.280941	0.10411	1.71066
Annotation Cluster 2	Enrichment Score: 4.089817018139044
Category	Term	Count	%	PValue	Genes	List Total	Pop Hits	Pop Total	Fold Enrichment	Bonferroni	Benjamini	FDR
GOTERM_CC_FAT	GO:0005576~extracellular region	55	16.2242	5.96933e-06	3627,6590,347862,54097,23467,80310,115908,5986,6866,4153,5444,5328,976,4036,2717,4982,24147,3547,4973,2,3956,3915,7076,9965,1370,9948,136227,114902,51205,760,51599,866,960,7474,12,6374,7423,722,23324,1462,1363,1298,2690,54749,2243,5340,716,118427,3162,4060,6035,51144,9518,83729,135228	234	1119	8798	1.84799	0.0014793	0.0014793	0.00774466
SP_PIR_KEYWORDS	signal	78	23.0088	7.88306e-06	4043,22875,3627,23654,23516,4897,6590,65010,347862,54097,80310,115908,5016,6866,7162,4153,3109,91283,5444,5328,2048,5794,976,84133,6648,4036,5033,2717,4982,2261,54621,24147,3547,2,51430,1510,92305,3915,7076,84892,9965,1370,136227,114902,146722,51205,8722,166647,866,960,7474,12,56128,56133,4277,6374,79971,7423,722,23324,1462,1298,1363,2690,54749,2243,5340,118427,716,2861,3938,4060,6035,9518,129293…	334	1886	13223	1.63733	0.00310112	0.00310112	0.0109706
UP_SEQ_FEATURE	signal peptide	78	23.0088	8.17131e-06	4043,22875,3627,23654,23516,4897,6590,65010,347862,54097,80310,115908,5016,6866,7162,4153,3109,91283,5444,5328,2048,5794,976,84133,6648,4036,5033,2717,4982,2261,54621,24147,3547,2,51430,1510,92305,3915,7076,84892,9965,1370,136227,114902,146722,51205,8722,166647,866,960,7474,12,56128,56133,4277,6374,79971,7423,722,23324,1462,1298,1363,2690,54749,2243,5340,118427,716,2861,3938,4060,6035,9518,129293…	334	1886	13210	1.63572	0.00892391	0.00892391	0.0130619
UP_SEQ_FEATURE	glycosylation site:N-linked (GlcNAc...)	85	25.0737	0.000122682	4043,22875,23654,23516,23461,4897,6514,65010,347862,54097,80310,23467,115908,5016,5986,481,7162,3109,5444,29953,5328,2048,5794,976,2014,4036,55852,11182,5033,2717,24145,51363,4982,2261,54621,24147,3547,2,4973,51430,1510,92305,4124,3915,84230,7076,84892,203328,1370,136227,114902,114801,146722,8722,64132,166647,7104,866,13,960,7474,12,56128,56133,4277,722,23324,1462,23670,54872,1363,2690,54749,2243…	334	2276	13210	1.47708	0.125926	0.0650806	0.19594
SP_PIR_KEYWORDS	glycoprotein	88	25.9587	0.000167075	4043,22875,23654,23516,23461,4897,6514,65010,347862,54097,80310,23467,115908,5016,5986,481,7162,3109,5444,29953,5328,2048,5794,976,2014,4036,55852,11182,5033,2717,24145,51363,4982,2261,54621,24147,3547,2,4973,51430,1510,92305,4124,3915,84230,7076,84892,203328,1370,136227,114902,114801,146722,8722,64132,166647,7104,866,13,960,7474,12,56128,56133,4277,7423,722,23324,1462,23670,54872,1298,1363,2690,…	334	2402	13223	1.45042	0.0637129	0.0323807	0.232274
SP_PIR_KEYWORDS	Secreted	43	12.6844	0.000176592	1370,136227,3627,114902,51205,866,6590,7474,12,347862,54097,80310,115908,6374,6866,7423,722,4153,23324,1462,5444,5328,976,1363,1298,2690,54749,4982,2243,5340,24147,3547,118427,4973,2,3956,4060,3915,6035,9518,83729,7076,9965	334	935	13223	1.82071	0.0672176	0.0229275	0.24549
SP_PIR_KEYWORDS	disulfide bond	59	17.4041	0.000315883	3627,4897,6590,65010,54097,80310,481,4153,91283,29953,5444,5328,5794,976,4036,2717,51363,975,4982,2261,54621,3547,4973,2,115701,1510,51430,3915,4124,7076,203328,9965,1370,136227,114902,146722,8722,64132,51599,960,13,4277,6374,7423,722,1462,1298,2690,2243,5340,716,118427,2861,4060,6035,9518,83729,2548,135228	334	1468	13223	1.59114	0.117042	0.0306401	0.43873
UP_SEQ_FEATURE	disulfide bond	52	15.3392	0.00434874	3627,4897,6590,65010,80310,54097,481,4153,29953,5444,91283,5328,976,4036,2717,975,4982,2261,54621,3547,4973,2,115701,1510,3915,7076,203328,9965,136227,114902,146722,8722,51599,960,13,4277,6374,7423,722,1462,1298,2690,2243,5340,716,118427,2861,4060,6035,9518,83729,2548	334	1398	13210	1.47113	0.991612	0.796819	6.72993

## Sheet: Huh-7 vs Huh-7i
Annotation Cluster 1	Enrichment Score: 13.692783115471236
Category	Term	Count	%	PValue	Genes	List Total	Pop Hits	Pop Total	Fold Enrichment	Bonferroni	Benjamini	FDR
SP_PIR_KEYWORDS	zinc-finger	307	17.6234	1.22405e-24	7750,91661,146050,7752,23515,1316,59348,146434,147949,79088,56731,84671,85463,389114,2959,51773,65243,84083,6095,55854,3097,3096,26009,118987,8028,81847,9877,51366,7071,148266,55552,546,152815,170960,7733,8411,440279,7738,84085,51592,54680,51193,169270,84885,7626,148254,253461,7627,23118,7181,58486,49855,49854,6477,11342,23390,91120,7182,79830,55870,125893,329,113835,23528,80853,10210,54482,23527…	1721	1366	13223	1.72678	6.38956e-22	3.19478e-22	1.77336e-21
SP_PIR_KEYWORDS	zinc	347	19.9196	4.68912e-20	7750,91661,146050,7752,23515,25797,1316,59348,146434,147949,79088,6868,56731,84671,85463,389114,5229,2959,51773,65243,84083,6095,55854,3097,3096,26009,118987,8028,81847,9877,5649,51366,7071,148266,55552,4124,546,152815,170960,7733,4502,8411,440279,7738,84085,51592,54680,51193,169270,84885,7626,148254,253461,7627,23118,7181,58486,49855,11342,6477,49854,23390,91120,7182,79830,8853,55870,125893,329,…	1721	1707	13223	1.56187	2.44772e-17	6.11931e-18	6.79341e-17
INTERPRO	IPR007087:Zinc finger, C2H2-type	158	9.07003	5.03507e-19	687,10793,22873,91661,84146,6018,7539,146050,7752,285346,1316,59348,55432,27332,163050,146434,147949,79088,56731,1386,84671,285989,81627,389114,54816,7543,26974,79788,65243,91975,3097,3096,55422,7071,148266,55552,7690,10168,7733,170960,8411,7695,7556,7738,7699,51710,10172,51193,80264,169270,10520,7626,148254,10010,79973,253461,7627,49855,49854,90321,64412,91120,23099,84924,10181,90594,57547,28526…	1517	609	11754	2.0102	8.84158e-16	8.84158e-16	8.52535e-16
GOTERM_MF_FAT	GO:0008270~zinc ion binding	356	20.4363	3.21214e-18	7750,91661,146050,7752,8887,23515,25797,1316,59348,2339,146434,147949,79088,6868,56731,84671,85463,389114,5229,2959,51773,65243,84083,6095,55854,3097,3096,26009,118987,8028,81847,9877,5649,51366,7071,148266,55552,4124,546,152815,170960,7733,4502,8411,440279,7738,84085,51592,54680,51193,169270,84885,7626,148254,253461,7627,23118,7181,58486,49855,11342,6477,49854,23390,91120,7182,79830,8853,55870,1…	1244	1774	9211	1.48588	3.43699e-15	3.43699e-15	5.11885e-15
INTERPRO	IPR015880:Zinc finger, C2H2-like	156	8.95522	1.1241e-17	687,10793,22873,91661,84146,6018,7539,146050,7752,285346,8887,1316,59348,55432,163050,27332,146434,147949,79088,56731,1386,84671,285989,81627,389114,54816,7543,26974,79788,65243,91975,3097,3096,55422,7071,148266,55552,7690,10168,7733,170960,8411,7695,7556,7738,7699,51710,10172,51193,80264,169270,10520,7626,148254,79973,253461,7627,49855,49854,90321,64412,91120,23099,84924,10181,10180,90594,57547,…	1517	617	11754	1.95902	1.97392e-14	9.86959e-15	1.90332e-14
SMART	SM00355:ZnF_C2H2	156	8.95522	7.34454e-14	687,10793,22873,91661,84146,6018,7539,146050,7752,285346,8887,1316,59348,55432,163050,27332,146434,147949,79088,56731,1386,84671,285989,81627,389114,54816,7543,26974,79788,65243,91975,3097,3096,55422,7071,148266,55552,7690,10168,7733,170960,8411,7695,7556,7738,7699,51710,10172,51193,80264,169270,10520,7626,148254,79973,253461,7627,49855,49854,90321,64412,91120,23099,84924,10181,10180,90594,57547,…	936	617	6501	1.75608	2.40334e-11	1.20167e-11	9.94982e-11
GOTERM_MF_FAT	GO:0046914~transition metal ion binding	389	22.3307	2.81764e-12	146050,8887,23515,1316,25797,59348,146434,147949,6868,79088,85463,5229,2959,85465,84083,6095,118987,26009,8028,51366,148266,546,545,8411,84085,51193,5352,84885,148254,58486,8445,6477,91120,79830,8853,329,23528,80853,23527,10600,55900,127396,2110,146198,55904,115426,653121,55279,9202,25898,51276,51136,9205,25897,2245,154007,9204,57486,26036,5324,29953,51132,79752,7587,50862,5927,7582,2122,7581,833…	1244	2144	9211	1.34342	3.01487e-09	1.50743e-09	4.49016e-09
SP_PIR_KEYWORDS	metal-binding	402	23.0769	9.16243e-12	146050,23515,1316,25797,59348,146434,147949,6868,79088,85463,5229,2959,85465,84083,6095,118987,26009,8028,6885,1326,51366,148266,546,8411,84085,51193,5352,84885,148254,58486,58480,6477,91120,79830,8853,329,23528,80853,23527,5238,10600,10746,55900,127396,2110,146198,55904,55276,115426,653121,55279,9202,25898,51276,51136,9205,25897,2245,154007,9204,57486,26036,5324,29953,51132,79752,63979,7587,5086…	1721	2297	13223	1.34467	4.7828e-09	7.97133e-10	1.32742e-08
GOTERM_MF_FAT	GO:0046872~metal ion binding	489	28.0712	3.80019e-07	146050,8887,25797,23515,1316,59348,146434,147949,6868,79088,85463,5229,2959,85465,1824,84083,6095,6786,26009,118987,8028,6885,1326,51366,148266,546,545,8411,84085,80727,51193,5352,84885,148254,51196,58486,8445,58480,6477,91120,79830,8853,329,129804,23528,80853,23527,5238,10600,10746,7220,55900,146198,2110,127396,55904,55276,115426,653121,55279,9202,51276,25898,51136,9205,25897,154007,2245,9204,26…	1244	3041	9211	1.19064	0.000406538	0.00010165	0.000605594
GOTERM_MF_FAT	GO:0043169~cation binding	493	28.3008	4.14848e-07	146050,8887,25797,23515,1316,59348,146434,147949,6868,79088,85463,85465,5229,2959,1824,84083,6095,6786,26009,118987,8028,6885,1326,51366,148266,546,545,8411,84085,80727,51193,178,5352,84885,148254,51196,58486,8445,58480,6477,91120,79830,8853,329,129804,23528,80853,23527,5238,10600,10746,7220,55900,146198,2110,127396,55904,55276,115426,653121,55279,9202,51276,25898,51136,9205,25897,154007,2245,920…	1244	3071	9211	1.18865	0.000443789	8.87735e-05	0.000661096
GOTERM_MF_FAT	GO:0043167~ion binding	497	28.5304	7.67953e-07	146050,8887,25797,23515,1316,59348,146434,147949,6868,79088,85463,85465,5229,2959,1824,84083,6095,6786,26009,118987,8028,6885,1326,51366,148266,546,545,8411,84085,80727,51193,178,5352,84885,148254,51196,58486,8445,58480,6477,91120,79830,8853,329,129804,23528,80853,23527,5238,10600,10746,7220,55900,146198,2110,127396,55904,55276,115426,653121,55279,9202,51276,25898,51136,9205,25897,154007,2245,920…	1244	3114	9211	1.18175	0.000821373	0.000136942	0.0012238
Annotation Cluster 2	Enrichment Score: 12.583420883036437
Category	Term	Count	%	PValue	Genes	List Total	Pop Hits	Pop Total	Fold Enrichment	Bonferroni	Benjamini	FDR
SP_PIR_KEYWORDS	zinc-finger	307	17.6234	1.22405e-24	7750,91661,146050,7752,23515,1316,59348,146434,147949,79088,56731,84671,85463,389114,2959,51773,65243,84083,6095,55854,3097,3096,26009,118987,8028,81847,9877,51366,7071,148266,55552,546,152815,170960,7733,8411,440279,7738,84085,51592,54680,51193,169270,84885,7626,148254,253461,7627,23118,7181,58486,49855,49854,6477,11342,23390,91120,7182,79830,55870,125893,329,113835,23528,80853,10210,54482,23527…	1721	1366	13223	1.72678	6.38956e-22	3.19478e-22	1.77336e-21
INTERPRO	IPR007087:Zinc finger, C2H2-type	158	9.07003	5.03507e-19	687,10793,22873,91661,84146,6018,7539,146050,7752,285346,1316,59348,55432,27332,163050,146434,147949,79088,56731,1386,84671,285989,81627,389114,54816,7543,26974,79788,65243,91975,3097,3096,55422,7071,148266,55552,7690,10168,7733,170960,8411,7695,7556,7738,7699,51710,10172,51193,80264,169270,10520,7626,148254,10010,79973,253461,7627,49855,49854,90321,64412,91120,23099,84924,10181,90594,57547,28526…	1517	609	11754	2.0102	8.84158e-16	8.84158e-16	8.52535e-16
UP_SEQ_FEATURE	domain:KRAB	86	4.93685	6.07134e-19	7700,10793,91661,55900,7539,340252,146198,127396,285346,59348,163050,146434,199692,51276,79088,147949,84671,285989,400713,389114,26974,163087,65243,91975,284349,7587,7644,6940,7582,7581,55422,148266,55552,7733,10168,7695,7556,7738,7699,7637,51710,7571,7673,7574,9534,163071,10172,134466,80264,7771,169270,10520,7770,7626,57786,147923,148254,79973,7769,284406,7627,7766,7569,90321,91120,84924,7562,75…	1720	243	13210	2.71811	2.25611e-15	2.25611e-15	1.1193e-15
SP_PIR_KEYWORDS	nucleus	609	34.9598	8.1385e-19	146050,10891,10892,1316,140890,59348,29028,23517,5378,27063,146434,29915,147949,79088,59343,2959,7486,79811,6095,85865,79718,26009,8028,51362,8731,25788,149420,23641,3298,51366,6881,148266,10625,546,545,80823,10725,10724,84280,55119,58487,51290,51193,205564,8036,57223,79828,148254,148398,79622,8445,6477,91120,10735,79830,8850,23528,2965,22913,10600,10746,988,55900,26039,146198,127396,55904,8636,1…	1721	3503	13223	1.33575	4.2483e-16	8.4966e-17	1.17907e-15
UP_SEQ_FEATURE	zinc finger region:C2H2-type 5	120	6.88863	4.05329e-18	10793,84146,91661,6018,7539,146050,7752,285346,59348,163050,146434,79088,147949,84671,285989,389114,54816,7543,26974,79788,65243,91975,3096,55422,148266,55552,7690,7733,10168,7695,7556,7738,7699,51710,10172,51193,80264,169270,10520,7626,148254,79973,7627,253461,90321,49854,64412,91120,84924,90594,57547,285268,125893,113835,90592,162966,27107,162967,199704,26137,7716,7718,84527,7700,7702,55900,770…	1720	414	13210	2.22615	1.5062e-14	7.531e-15	7.47257e-15
INTERPRO	IPR015880:Zinc finger, C2H2-like	156	8.95522	1.1241e-17	687,10793,22873,91661,84146,6018,7539,146050,7752,285346,8887,1316,59348,55432,163050,27332,146434,147949,79088,56731,1386,84671,285989,81627,389114,54816,7543,26974,79788,65243,91975,3097,3096,55422,7071,148266,55552,7690,10168,7733,170960,8411,7695,7556,7738,7699,51710,10172,51193,80264,169270,10520,7626,148254,79973,253461,7627,49855,49854,90321,64412,91120,23099,84924,10181,10180,90594,57547,…	1517	617	11754	1.95902	1.97392e-14	9.86959e-15	1.90332e-14
INTERPRO	IPR001909:Krueppel-associated box	86	4.93685	1.20517e-17	7700,10793,91661,55900,7539,340252,146198,127396,285346,59348,163050,146434,199692,51276,79088,147949,84671,285989,400713,389114,26974,163087,65243,91975,284349,7587,7644,6940,7582,7581,55422,148266,55552,7733,10168,7695,7556,7738,7699,7637,51710,7571,7673,7574,9534,163071,134466,80264,7771,169270,10520,7770,7626,57786,147923,148254,79973,7769,284406,7627,7766,7569,284443,90321,91120,84924,7562,7…	1517	256	11754	2.60291	2.11629e-14	7.05429e-15	2.0406e-14
UP_SEQ_FEATURE	zinc finger region:C2H2-type 6	109	6.25718	6.79665e-17	10793,84146,91661,6018,7539,146050,285346,59348,163050,146434,79088,147949,84671,285989,389114,7543,26974,79788,65243,91975,55422,148266,55552,7690,7733,170960,10168,7695,7556,7738,7699,51710,10172,51193,80264,169270,10520,148254,79973,253461,90321,64412,91120,84924,90594,57547,285268,125893,113835,162966,27107,90592,162967,199704,7716,7718,84527,7700,55900,7702,7705,340252,127396,146198,22834,19…	1720	372	13210	2.25039	4.12559e-13	1.37557e-13	1.9984e-13
UP_SEQ_FEATURE	zinc finger region:C2H2-type 9	90	5.16648	2.57258e-16	7700,10793,91661,7539,6018,7705,340252,146198,285346,163050,199692,51276,79088,147949,84671,26036,400713,7543,23036,26974,79788,163087,65243,91975,284349,7587,7644,6940,2122,22847,7582,7581,55422,148266,55552,643836,170960,7733,10168,7695,7556,7738,7699,7637,51710,7571,7673,137209,7574,9534,10172,55769,80264,7771,169270,10520,7770,57786,147923,148254,7769,79973,284406,253461,7766,7569,284443,9032…	1720	282	13210	2.45114	8.25118e-13	2.06279e-13	4.10783e-13
UP_SEQ_FEATURE	zinc finger region:C2H2-type 3	128	7.34788	3.45439e-16	687,10793,84146,91661,6018,146050,7752,285346,1316,59348,163050,146434,79088,147949,84671,285989,389114,7543,26974,79788,65243,91975,3097,3096,55422,7071,148266,55552,7690,7733,10168,7695,7556,7738,7699,51710,10172,51193,80264,169270,10520,7626,148254,79973,253461,7627,90321,49854,64412,91120,84924,90594,57547,285268,125893,113835,90592,162966,27107,162967,23528,199704,26137,7716,221302,7718,7700…	1720	477	13210	2.06094	1.23768e-12	2.4758e-13	6.10623e-13
UP_SEQ_FEATURE	zinc finger region:C2H2-type 8	96	5.51091	5.84718e-16	7700,7539,6018,340252,7705,146198,127396,22834,285346,59348,163050,199692,51276,79088,147949,84671,285989,26036,400713,389114,7543,23036,26974,79788,163087,65243,91975,284349,7587,7644,6940,2122,22847,7582,7581,55892,55422,148266,55552,643836,170960,7733,10168,7695,7556,7738,7637,7699,7571,51710,7673,7574,137209,9534,10172,51193,55769,80264,7771,169270,10520,7770,57786,147923,148254,7769,79973,28…	1720	315	13210	2.34064	2.06279e-12	3.43836e-13	1.02141e-12
UP_SEQ_FEATURE	zinc finger region:C2H2-type 7	102	5.85534	6.00848e-16	10793,84146,91661,6018,7539,285346,59348,163050,146434,79088,147949,285989,84671,389114,7543,26974,79788,65243,91975,55422,148266,55552,7733,170960,10168,7695,7556,7738,7699,51710,10172,51193,80264,169270,10520,148254,79973,253461,90321,49854,64412,91120,84924,90594,57547,285268,125893,113835,162966,27107,90592,162967,84527,7700,55900,7702,7705,340252,127396,146198,22834,199692,51276,400713,5324,…	1720	345	13210	2.27068	2.06279e-12	2.94653e-13	1.02141e-12
INTERPRO	IPR013087:Zinc finger, C2H2-type/integrase, DNA-binding	124	7.11825	1.1614e-15	687,10793,91661,7539,146050,7752,285346,1316,59348,163050,146434,79088,147949,84671,285989,389114,7543,26974,79788,65243,91975,3097,3096,55422,7071,148266,55552,7733,170960,10168,7695,7556,7738,7699,51710,10172,80264,169270,10520,7626,148254,79973,7627,253461,90321,64412,91120,23099,84924,90594,57547,285268,125893,113835,90592,162966,27107,162967,23528,199704,26137,7716,7718,84527,7700,7702,55900…	1517	467	11754	2.05733	1.94955e-12	4.87388e-13	1.87628e-12
UP_SEQ_FEATURE	zinc finger region:C2H2-type 10	81	4.64983	1.43418e-15	7700,10793,91661,7539,6018,7705,340252,146198,285346,163050,199692,51276,79088,147949,84671,26036,400713,7543,26974,79788,163087,91975,284349,7587,7644,6940,2122,7582,7581,55422,148266,55552,643836,170960,7733,10168,7695,7556,7738,7699,7637,51710,7571,137209,7574,9534,10172,55769,80264,7771,169270,10520,7770,147923,148254,79973,7769,284406,253461,7569,284443,90321,64412,91120,7562,7561,171392,905…	1720	247	13210	2.51862	5.36327e-12	6.70353e-13	2.66454e-12
UP_SEQ_FEATURE	zinc finger region:C2H2-type 2	125	7.17566	1.49794e-15	687,10793,84146,91661,6018,7539,146050,7752,285346,1316,59348,163050,146434,147949,79088,84671,285989,389114,54816,7543,79788,65243,91975,3097,3096,55422,7071,148266,55552,7690,7733,170960,10168,7695,7556,7738,7699,51710,10172,51193,80264,169270,10520,7626,148254,79973,7627,49854,64412,91120,23099,84924,90594,57547,285268,125893,113835,90592,162966,27107,162967,23528,199704,26137,7716,221302,7718…	1720	469	13210	2.04697	5.36327e-12	5.95968e-13	2.66454e-12
SMART	SM00349:KRAB	86	4.93685	6.1235e-15	7700,10793,91661,55900,7539,340252,146198,127396,285346,59348,163050,146434,199692,51276,79088,147949,84671,285989,400713,389114,26974,163087,65243,91975,284349,7587,7644,6940,7582,7581,55422,148266,55552,7733,10168,7695,7556,7738,7699,7637,51710,7571,7673,7574,9534,163071,134466,80264,7771,169270,10520,7770,7626,57786,147923,148254,79973,7769,284406,7627,7766,7569,284443,90321,91120,84924,7562,7…	936	256	6501	2.33326	1.99674e-12	1.99674e-12	8.27116e-12
UP_SEQ_FEATURE	zinc finger region:C2H2-type 4	118	6.77382	1.86415e-14	10793,84146,91661,6018,7539,146050,7752,285346,59348,163050,146434,79088,147949,84671,285989,389114,54816,7543,26974,79788,65243,91975,3097,3096,55422,148266,55552,7733,170960,10168,7695,7556,7738,7699,51710,10172,51193,80264,169270,10520,7626,148254,79973,7627,253461,90321,64412,91120,84924,90594,285268,125893,162966,90592,27107,162967,199704,26137,7716,7718,7700,7702,55900,7705,340252,127396,14…	1720	446	13210	2.03199	6.93099e-11	6.93101e-12	3.43836e-11
UP_SEQ_FEATURE	zinc finger region:C2H2-type 11	71	4.07577	2.90147e-14	7700,10793,7539,6018,340252,146198,285346,163050,51276,199692,79088,147949,84671,26036,400713,7543,26974,163087,79788,91975,284349,7644,7587,6940,7582,7581,55422,148266,643836,170960,7733,10168,7695,7738,7637,51710,7571,137209,7574,9534,10172,55769,80264,7771,169270,10520,7770,57786,147923,148254,7769,284406,7569,284443,7562,7561,171392,90594,57547,125893,57711,80095,113835,27107,90592,162967,199…	1720	212	13210	2.57215	1.07678e-10	9.78895e-12	5.34239e-11
SMART	SM00355:ZnF_C2H2	156	8.95522	7.34454e-14	687,10793,22873,91661,84146,6018,7539,146050,7752,285346,8887,1316,59348,55432,163050,27332,146434,147949,79088,56731,1386,84671,285989,81627,389114,54816,7543,26974,79788,65243,91975,3097,3096,55422,7071,148266,55552,7690,10168,7733,170960,8411,7695,7556,7738,7699,51710,10172,51193,80264,169270,10520,7626,148254,79973,253461,7627,49855,49854,90321,64412,91120,23099,84924,10181,10180,90594,57547,…	936	617	6501	1.75608	2.40334e-11	1.20167e-11	9.94982e-11
UP_SEQ_FEATURE	zinc finger region:C2H2-type 12	63	3.61653	7.57306e-14	10793,7539,6018,340252,146198,285346,163050,51276,79088,147949,84671,400713,7543,79788,91975,284349,7644,7587,6940,7582,7581,55422,148266,55552,643836,170960,7733,10168,7695,7738,7637,51710,7571,137209,7574,9534,10172,55769,7771,10520,7770,57786,147923,148254,79973,7769,284406,7569,284443,7562,7561,171392,57547,125893,80095,113835,27107,162966,90592,199704,80110,93134,84527	1720	179	13210	2.7031	2.81365e-10	2.34471e-11	1.39588e-10
PIR_SUPERFAMILY	PIRSF005559:zinc finger protein ZFP-36	39	2.23881	4.01263e-12	7.57152e+192	556	104	5036	3.39658	2.42366e-09	2.42366e-09	5.93181e-09
UP_SEQ_FEATURE	zinc finger region:C2H2-type 1	109	6.25718	5.3849e-12	687,84146,6018,7539,146050,7752,285346,1316,59348,163050,146434,147949,285989,389114,7543,54816,26974,79788,65243,91975,3097,3096,55422,7071,148266,55552,7690,7733,10168,7738,7699,10172,51193,80264,169270,10520,7626,7627,253461,49854,64412,91120,90594,57547,285268,125893,113835,27107,90592,162967,23528,199704,26137,7716,221302,55900,7702,7705,340252,127396,146198,22834,7707,653121,55279,199692,51…	1720	432	13210	1.93784	2.00103e-08	1.53926e-09	9.92755e-09
SP_PIR_KEYWORDS	transcription regulation	294	16.8772	2.24518e-11	7750,55749,91661,10891,4205,146050,7752,1316,59348,29028,146434,6619,79088,147949,56731,84671,389114,2959,51773,65056,6617,57761,65243,79811,6095,55758,3097,3096,79718,26009,8028,3298,6881,4603,7071,148266,55552,4601,10725,170960,7733,7738,51592,58487,9984,55729,51193,169270,7626,1997,1998,148254,253461,7627,7181,4783,49854,7182,91120,9994,8850,2309,55870,125893,113835,23528,53615,2301,80205,2965…	1721	1584	13223	1.42607	1.17198e-08	1.67426e-09	3.25273e-08
GOTERM_MF_FAT	GO:0003677~DNA binding	324	18.5993	1.14786e-10	91661,10891,4205,146050,1316,59348,29028,5378,27063,146434,6619,147949,79088,56731,84671,56916,389114,2959,6498,65056,6617,7486,65243,84083,6095,55758,3097,79718,3096,26009,8028,25788,3298,6881,4603,7071,148266,55552,10721,4601,546,152815,545,10725,170960,7733,115677,7738,51592,58487,9984,51193,169270,7626,1997,25909,1998,148254,253461,7627,7181,4783,58486,49854,91120,7182,2309,55870,125893,11383…	1244	1764	9211	1.35998	1.22821e-07	4.09403e-08	1.82922e-07
UP_SEQ_FEATURE	zinc finger region:C2H2-type 15	38	2.1814	1.23484e-10	7.57152e+188	1720	94	13210	3.10477	4.58865e-07	3.27761e-08	2.27652e-07
SP_PIR_KEYWORDS	dna-binding	261	14.9828	1.26958e-10	91661,4205,146050,1316,59348,146434,6619,79088,147949,56731,84671,389114,65056,6617,7486,65243,6095,3097,3096,26009,8028,25788,3298,4603,7071,148266,55552,4601,546,152815,545,10725,170960,7733,7738,51592,9984,51193,169270,7626,1997,25909,1998,148254,253461,7627,7181,4783,49854,7182,91120,125893,2309,113835,23528,2301,1060,80205,25913,7716,7718,988,55900,127396,146198,10388,115426,653121,55279,512…	1721	1391	13223	1.44166	6.6272e-08	8.284e-09	1.83931e-07
SP_PIR_KEYWORDS	Transcription	296	16.992	2.35645e-10	7750,55749,91661,10891,4205,146050,7752,1316,59348,29028,146434,6619,79088,147949,56731,84671,389114,2959,51773,65056,6617,57761,65243,79811,6095,55758,3097,3096,79718,26009,8028,3298,6881,4603,7071,148266,55552,4601,10725,170960,7733,7738,51592,58487,9984,55729,51193,169270,7626,1997,1998,148254,253461,7627,7181,4783,49854,7182,91120,9994,8850,2309,55870,125893,113835,23528,53615,2301,80205,2965…	1721	1630	13223	1.39525	1.23007e-07	1.36674e-08	3.41393e-07
UP_SEQ_FEATURE	zinc finger region:C2H2-type 13	47	2.69805	9.16844e-10	7.57152e+231	1720	140	13210	2.57836	3.40699e-06	2.27133e-07	1.69028e-06
GOTERM_BP_FAT	GO:0006350~transcription	298	17.1068	1.64151e-09	7750,55749,91661,10891,4205,146050,7752,1316,59348,29028,146434,6619,79088,147949,56731,84671,389114,2959,6498,51773,65056,6617,57761,65243,79811,6095,55758,3097,3096,79718,26009,3298,6881,4603,7071,148266,55552,10625,4601,10725,170960,7733,7738,51592,58487,55729,51193,169270,7626,1997,25909,1998,148254,253461,7627,7181,4783,49854,7182,91120,9994,8850,2309,55870,125893,113835,23528,53615,2301,102…	1289	1647	9658	1.35568	5.09031e-06	5.09031e-06	2.96672e-06
UP_SEQ_FEATURE	zinc finger region:C2H2-type 14	39	2.23881	3.05084e-09	7.57152e+193	1720	108	13210	2.77342	1.13368e-05	7.08556e-07	5.62447e-06
GOTERM_BP_FAT	GO:0045449~regulation of transcription	340	19.5178	1.3832e-07	7750,55749,91661,10891,4205,146050,10892,7752,1316,59348,29028,27063,146434,6619,147949,79088,29915,56731,84671,56916,389114,2959,6498,51773,65056,6617,57761,65243,79811,6095,55758,3097,79718,3096,26009,25788,3298,6881,4603,7071,148266,55552,4601,546,10725,170960,7733,115677,79612,7738,51592,58487,55729,51193,169270,92140,7626,1997,1998,148254,253461,7627,7181,4783,49854,91120,7182,9994,8850,2309…	1289	2003	9658	1.27184	0.000428837	0.000214442	0.000249986
UP_SEQ_FEATURE	zinc finger region:C2H2-type 1; degenerate	28	1.60735	1.78851e-07	7.57152e+135	1720	73	13210	2.94584	0.00066439	3.9094e-05	0.000329727
GOTERM_BP_FAT	GO:0051252~regulation of RNA metabolic process	227	13.031	8.10629e-05	91661,10891,4205,146050,1316,59348,27063,146434,29915,79088,147949,56731,84671,389114,2959,6498,51773,65243,79810,6095,3097,3096,79718,3298,4603,7071,148266,55552,546,10725,7733,115677,79612,7738,58487,55729,51193,169270,92140,7626,1997,1998,148254,253461,7627,7181,4783,7182,91120,8850,125893,2309,113835,23528,53615,2301,2965,7716,7718,10600,440122,988,55900,127396,146198,55904,8467,51276,80314,4…	1289	1354	9658	1.25615	0.222278	0.0410321	0.146405
GOTERM_BP_FAT	GO:0006355~regulation of transcription, DNA-dependent	220	12.6292	0.000150824	91661,10891,146050,4205,1316,59348,27063,146434,29915,79088,147949,56731,84671,389114,2959,6498,51773,65243,6095,3097,3096,79718,3298,4603,7071,148266,55552,546,7733,10725,115677,79612,7738,58487,55729,51193,169270,92140,7626,1997,1998,148254,7627,253461,7181,4783,7182,91120,8850,125893,2309,113835,23528,53615,2301,2965,7716,7718,10600,440122,988,55900,127396,146198,55904,8467,51276,80314,400713,…	1289	1320	9658	1.24877	0.373585	0.0567913	0.272236
GOTERM_MF_FAT	GO:0030528~transcription regulator activity	149	8.55339	0.81641	687,6018,7539,10891,4205,146050,114821,285346,1316,59348,23462,29028,27063,29915,56731,1386,80184,2959,6498,51773,10138,64216,7543,57761,9044,9443,676,6095,22887,675,3205,3096,79718,8028,4297,51567,3298,9541,6881,4603,7071,4601,7690,10725,10168,7695,115677,7699,152518,2625,9984,58487,8553,10172,55729,51193,10520,7626,1997,9774,1998,253461,1649,4801,7181,23429,4783,7182,3131,5966,9994,7110,8850,23…	1244	1166	9211	0.946181	1	0.999935	100
Annotation Cluster 3	Enrichment Score: 6.838114811083478
Category	Term	Count	%	PValue	Genes	List Total	Pop Hits	Pop Total	Fold Enrichment	Bonferroni	Benjamini	FDR
GOTERM_CC_FAT	GO:0043228~non-membrane-bounded organelle	304	17.4512	9.26565e-09	59348,23517,2339,55740,146434,10486,51175,9857,6868,23271,56916,23137,57761,7486,55758,85865,79718,167691,55752,51361,4603,8727,7175,10625,546,152815,545,23122,115677,11340,205564,8100,57223,92140,25909,23012,124602,58480,10735,7182,117177,55930,54874,329,324,1063,53615,55207,1060,80205,25913,10749,56907,55785,989,988,26039,79848,8636,57584,10388,983,8467,23177,25897,2245,9204,55602,55605,9497,55…	1004	2018	8798	1.32009	4.94784e-06	4.94784e-06	1.34663e-05
GOTERM_CC_FAT	GO:0043232~intracellular non-membrane-bounded organelle	304	17.4512	9.26565e-09	59348,23517,2339,55740,146434,10486,51175,9857,6868,23271,56916,23137,57761,7486,55758,85865,79718,167691,55752,51361,4603,8727,7175,10625,546,152815,545,23122,115677,11340,205564,8100,57223,92140,25909,23012,124602,58480,10735,7182,117177,55930,54874,329,324,1063,53615,55207,1060,80205,25913,10749,56907,55785,989,988,26039,79848,8636,57584,10388,983,8467,23177,25897,2245,9204,55602,55605,9497,55…	1004	2018	8798	1.32009	4.94784e-06	4.94784e-06	1.34663e-05
GOTERM_CC_FAT	GO:0005856~cytoskeleton	153	8.78301	3.56373e-05	81631,3005,55183,54908,2339,23710,55740,288,9857,51175,6868,23271,889,80184,23077,7486,56992,675,79718,167691,22981,51361,55752,9735,11007,8727,10625,472,152815,84333,23122,115677,10142,51710,10174,26064,9368,5144,5048,1783,22995,8100,57223,55165,23012,6683,124602,3796,23322,102,58480,3799,10735,84722,117177,55930,10513,55075,54874,80254,324,80351,1063,55207,7429,23433,7813,11127,10749,56907,5480…	1004	989	8798	1.35564	0.0188507	0.00271497	0.0517812
Annotation Cluster 4	Enrichment Score: 5.843958597791242
Category	Term	Count	%	PValue	Genes	List Total	Pop Hits	Pop Total	Fold Enrichment	Bonferroni	Benjamini	FDR
UP_SEQ_FEATURE	zinc finger region:C2H2-type 12	63	3.61653	7.57306e-14	10793,7539,6018,340252,146198,285346,163050,51276,79088,147949,84671,400713,7543,79788,91975,284349,7644,7587,6940,7582,7581,55422,148266,55552,643836,170960,7733,10168,7695,7738,7637,51710,7571,137209,7574,9534,10172,55769,7771,10520,7770,57786,147923,148254,79973,7769,284406,7569,284443,7562,7561,171392,57547,125893,80095,113835,27107,162966,90592,199704,80110,93134,84527	1720	179	13210	2.7031	2.81365e-10	2.34471e-11	1.39588e-10
UP_SEQ_FEATURE	zinc finger region:C2H2-type 15	38	2.1814	1.23484e-10	7.57152e+188	1720	94	13210	3.10477	4.58865e-07	3.27761e-08	2.27652e-07
UP_SEQ_FEATURE	zinc finger region:C2H2-type 13	47	2.69805	9.16844e-10	7.57152e+231	1720	140	13210	2.57836	3.40699e-06	2.27133e-07	1.69028e-06
UP_SEQ_FEATURE	zinc finger region:C2H2-type 14	39	2.23881	3.05084e-09	7.57152e+193	1720	108	13210	2.77342	1.13368e-05	7.08556e-07	5.62447e-06
UP_SEQ_FEATURE	zinc finger region:C2H2-type 16	28	1.60735	2.46992e-07	7.57152e+136	1720	74	13210	2.90603	0.000917401	4.83052e-05	0.000455349
UP_SEQ_FEATURE	zinc finger region:C2H2-type 17	22	1.26292	2.25562e-06	7.57152e+108	1720	55	13210	3.07209	0.00834685	0.000419006	0.00415834
UP_SEQ_FEATURE	zinc finger region:C2H2-type 18	18	1.0333	1.72216e-05	7.56176e+90	1720	44	13210	3.14191	0.0619911	0.00304278	0.0317446
UP_SEQ_FEATURE	zinc finger region:C2H2-type 19	15	0.861079	0.000237438	7.56176e+74	1720	39	13210	2.95394	0.586222	0.0346813	0.436832
UP_SEQ_FEATURE	zinc finger region:C2H2-type 21	6	0.344432	0.0743837	7.64458e+31	1720	18	13210	2.56008	1	0.984435	75.9493
UP_SEQ_FEATURE	zinc finger region:C2H2-type 22	6	0.344432	0.0905873	7.64464e+32	1720	19	13210	2.42534	1	0.99037	82.633
UP_SEQ_FEATURE	zinc finger region:C2H2-type 20	7	0.401837	0.129642	7.64458e+37	1720	27	13210	1.99117	1	0.996333	92.2681
Annotation Cluster 5	Enrichment Score: 5.511229700178574
Category	Term	Count	%	PValue	Genes	List Total	Pop Hits	Pop Total	Fold Enrichment	Bonferroni	Benjamini	FDR
SP_PIR_KEYWORDS	DNA damage	51	2.92767	2.73179e-07	7.91848e+230	1721	186	13223	2.10672	0.000142589	1.29635e-05	0.00039577
GOTERM_BP_FAT	GO:0006974~response to DNA damage stimulus	79	4.53502	3.69533e-07	79184,8883,5893,84142,26122,286053,55183,5378,983,9748,8930,51776,7398,51426,23137,7486,2067,675,4361,5884,11232,5981,5980,56852,25788,7405,51567,51366,7507,79915,9874,11284,10721,4750,546,545,472,4646,8450,23064,5932,4331,11201,11073,2070,4683,2073,57697,257218,84268,1647,7336,1649,5965,10111,8445,26057,55075,79677,2309,133746,4436,80254,324,200558,10210,3981,2965,1022,51455,4287,2187,7559,83990…	1289	336	9658	1.76166	0.00114526	0.000381901	0.000667859
SP_PIR_KEYWORDS	dna repair	47	2.69805	7.93505e-07	7.91841e+211	1721	171	13223	2.11179	0.000414124	3.45169e-05	0.00114959
GOTERM_BP_FAT	GO:0006281~DNA repair	62	3.55913	2.48515e-06	7.91848e+274	1289	255	9658	1.82174	0.00767686	0.00192476	0.00449136
GOTERM_BP_FAT	GO:0006259~DNA metabolic process	90	5.16648	3.63215e-05	79184,8883,116138,5893,114821,84142,55904,26122,286053,5378,9748,8930,10926,23075,7398,51426,23137,7486,2067,675,4361,5884,11232,5981,5980,3487,56852,25788,7405,4297,51567,7507,11284,10721,5937,546,545,472,8450,55035,55704,23064,285636,54826,5932,4331,11201,11073,2070,4683,55729,6241,2073,57697,257218,1647,84268,7336,5965,286826,10111,7083,84515,5763,26057,79677,133746,4436,7155,200558,1063,5469,…	1289	444	9658	1.51878	0.106523	0.0222752	0.065624
GOTERM_BP_FAT	GO:0033554~cellular response to stress	97	5.56831	0.000118428	8883,84142,55183,5378,9748,9140,8930,6416,51776,51426,23137,7486,675,56852,7405,25788,51567,79915,51366,116496,9874,11284,10721,546,545,27327,472,23064,5932,2070,2073,10087,57697,1647,1649,7336,5965,10111,1462,8445,26057,55075,2309,4436,80254,324,200558,10210,2965,2187,10746,727726,64421,79184,5893,26122,286053,983,7398,2067,5796,4361,5884,11232,5981,5980,7507,1852,11183,9821,440,4750,8450,4646,4…	1289	502	9658	1.44778	0.307375	0.0511141	0.21382
Annotation Cluster 6	Enrichment Score: 5.185431787884803
Category	Term	Count	%	PValue	Genes	List Total	Pop Hits	Pop Total	Fold Enrichment	Bonferroni	Benjamini	FDR
GOTERM_CC_FAT	GO:0005813~centrosome	51	2.92767	8.53525e-08	7.98489e+238	1004	204	8798	2.19074	4.55772e-05	2.27889e-05	0.000124048
GOTERM_CC_FAT	GO:0005815~microtubule organizing center	54	3.09989	1.41899e-07	7.98489e+251	1004	225	8798	2.10311	7.57712e-05	2.52577e-05	0.00020623
GOTERM_CC_FAT	GO:0015630~microtubule cytoskeleton	90	5.16648	3.58211e-07	81631,989,79848,8636,22832,55183,2339,54908,23710,983,9857,51175,79959,23177,23271,25897,80184,55605,23077,7486,55125,9611,56992,675,27031,79718,167691,22981,51361,9735,11007,84376,80321,9702,121441,6249,7128,152815,472,4751,7840,84333,23122,10142,5311,5108,3800,11073,4739,5144,5048,11104,1783,4735,22995,8100,57223,667,54839,55165,55835,6683,6905,124602,153241,7871,3796,4133,23322,4130,8481,4131,…	1004	465	8798	1.69605	0.000191266	4.782e-05	0.000520607
GOTERM_CC_FAT	GO:0005856~cytoskeleton	153	8.78301	3.56373e-05	81631,3005,55183,54908,2339,23710,55740,288,9857,51175,6868,23271,889,80184,23077,7486,56992,675,79718,167691,22981,51361,55752,9735,11007,8727,10625,472,152815,84333,23122,115677,10142,51710,10174,26064,9368,5144,5048,1783,22995,8100,57223,55165,23012,6683,124602,3796,23322,102,58480,3799,10735,84722,117177,55930,10513,55075,54874,80254,324,80351,1063,55207,7429,23433,7813,11127,10749,56907,5480…	1004	989	8798	1.35564	0.0188507	0.00271497	0.0517812
GOTERM_CC_FAT	GO:0044430~cytoskeletal part	107	6.14237	0.000180731	81631,55183,54908,2339,23710,51175,9857,23271,80184,7486,56992,675,79718,167691,22981,55752,51361,9735,11007,472,84333,23122,10142,5144,5048,1783,22995,8100,57223,55165,6683,124602,3796,102,23322,58480,3799,84722,117177,55930,10513,80254,324,80351,1063,55207,23433,7813,11127,10749,54801,989,11259,79848,22832,8636,10398,983,79959,23177,25897,55605,55607,55125,23022,9611,27031,5411,5881,57120,84376…	1004	668	8798	1.40365	0.0920072	0.00873606	0.262345
SP_PIR_KEYWORDS	cytoskeleton	90	5.16648	0.00276146	55785,989,79848,22832,8636,57584,55183,54908,55740,288,9857,51175,79959,51466,23177,25897,2245,80184,55607,9590,5775,55125,23022,56992,91624,167691,22981,55752,51361,9735,11007,84376,80321,9702,8727,121441,10625,6249,7840,23122,115677,10142,5108,10174,26064,11073,2934,4739,5144,5048,11104,4735,22995,57223,667,54839,55165,55835,23012,6683,6905,29109,153241,7871,3796,4133,6640,23322,8481,3799,55075…	1721	515	13223	1.34272	0.763895	0.060831	3.92704
Annotation Cluster 7	Enrichment Score: 3.728941660886419
Category	Term	Count	%	PValue	Genes	List Total	Pop Hits	Pop Total	Fold Enrichment	Bonferroni	Benjamini	FDR
INTERPRO	IPR014001:DEAD-like helicase, N-terminal	32	1.83697	2.10088e-06	7.96651e+152	1517	101	11754	2.45487	0.00368235	0.000737556	0.00355713
INTERPRO	IPR001650:DNA/RNA helicase, C-terminal	30	1.72216	1.22556e-05	7.96651e+143	1517	99	11754	2.34794	0.021291	0.0035804	0.0207491
INTERPRO	IPR014021:Helicase, superfamily 1 and 2, ATP-binding	30	1.72216	1.22556e-05	7.96651e+141	1517	99	11754	2.34794	0.021291	0.0035804	0.0207491
SMART	SM00487:DEXDc	32	1.83697	1.87344e-05	7.96651e+152	936	101	6501	2.20056	0.00610748	0.00203999	0.0253606
SP_PIR_KEYWORDS	helicase	34	1.95178	2.44069e-05	7.96651e+161	1721	122	13223	2.14125	0.0126597	0.000849009	0.0353538
UP_SEQ_FEATURE	domain:Helicase C-terminal	29	1.66475	2.76794e-05	7.96652e+137	1720	97	13210	2.29615	0.0977451	0.00466446	0.0510171
UP_SEQ_FEATURE	domain:Helicase ATP-binding	29	1.66475	5.07251e-05	7.96652e+136	1720	100	13210	2.22727	0.171799	0.00816212	0.0934746
SMART	SM00490:HELICc	30	1.72216	7.30075e-05	7.96651e+143	936	98	6501	2.12618	0.0235916	0.0059508	0.0987961
GOTERM_MF_FAT	GO:0004386~helicase activity	34	1.95178	0.000116655	7.96651e+161	1244	127	9211	1.98226	0.117351	0.0176745	0.185739
INTERPRO	IPR011545:DNA/RNA helicase, DEAD/DEAH box type, N-terminal	19	1.0907	0.000146704	7.48611e+92	1517	56	11754	2.62885	0.22712	0.0316909	0.248109
UP_SEQ_FEATURE	short sequence motif:DEAH box	14	0.803674	0.000890124	7.4868e+68	1720	39	13210	2.75701	0.963454	0.119509	1.62835
GOTERM_MF_FAT	GO:0008026~ATP-dependent helicase activity	23	1.32032	0.0018971	7.4868e+110	1244	86	9211	1.98023	0.868903	0.168656	2.98074
GOTERM_MF_FAT	GO:0070035~purine NTP-dependent helicase activity	23	1.32032	0.0018971	7.4868e+110	1244	86	9211	1.98023	0.868903	0.168656	2.98074
GOTERM_MF_FAT	GO:0016887~ATPase activity	54	3.09989	0.00298248	2.30782e+246	1244	271	9211	1.4754	0.959075	0.162687	4.64846
GOTERM_MF_FAT	GO:0042623~ATPase activity, coupled	44	2.52583	0.0141984	7.96654e+201	1244	229	9211	1.42267	1	0.457759	20.3785
INTERPRO	IPR002464:DNA/RNA helicase, ATP-dependent, DEAH-box type, conserved site	9	0.516648	0.0632665	7.4868e+41	1517	34	11754	2.05099	1	0.947278	66.9322
Annotation Cluster 8	Enrichment Score: 3.4210265481013775
Category	Term	Count	%	PValue	Genes	List Total	Pop Hits	Pop Total	Fold Enrichment	Bonferroni	Benjamini	FDR
GOTERM_CC_FAT	GO:0031981~nuclear lumen	199	11.4237	2.63984e-06	7750,51574,10891,23515,59348,23517,27063,146434,56916,2959,57761,7486,84081,55758,85865,79718,8731,51567,6881,4603,10721,10625,7175,545,79612,55656,11340,9984,55729,205564,92140,25909,55660,7182,8850,1063,53615,10210,2301,2965,25913,988,55904,983,8467,80314,9204,55602,84864,7398,51132,9611,4361,5926,5927,5411,55269,96764,135295,6199,9584,10572,4751,4646,23029,9318,4331,11201,4683,11103,83591,6598…	1004	1296	8798	1.34555	0.00140868	0.000281896	0.00383657
GOTERM_CC_FAT	GO:0005654~nucleoplasm	125	7.17566	0.000102227	7750,51574,10891,23515,59348,27332,27063,10926,64318,2959,7486,9443,675,84081,3205,4686,79718,8731,4297,51567,9541,6881,64326,10721,7175,10625,545,472,23064,79612,55656,9984,55729,26060,2073,9360,25909,23198,5565,5563,4801,23429,286826,58517,55660,84515,8850,53615,10210,2301,4170,2965,79960,25913,80155,23595,8559,9969,988,26512,5893,54556,55904,6729,11193,983,8467,51322,80314,55602,9972,7398,5113…	1004	794	8798	1.37956	0.0531286	0.00604741	0.14847
GOTERM_CC_FAT	GO:0070013~intracellular organelle lumen	222	12.744	0.000488454	7750,51574,10891,23515,59348,23517,27063,38,146434,56916,2959,57761,7486,84081,55758,85865,55757,79718,8731,51567,6881,4603,10721,7175,10625,545,79612,55656,11340,9984,55729,205564,92140,25909,55660,143888,7182,8850,1063,53615,2301,10210,2965,134266,25913,988,55904,983,8467,80314,9204,55602,84869,7398,84864,51132,9611,4361,5926,5927,5411,11232,96764,55269,64975,135295,6199,9584,10572,4751,4646,23…	1004	1595	8798	1.21967	0.229641	0.019869	0.707556
[truncated: 75 more rows]

## Sheet: Huh-7.5.1 vs Huh-7.5.1i
Annotation Cluster 1	Enrichment Score: 3.0455853170489244
Category	Term	Count	%	PValue	Genes	List Total	Pop Hits	Pop Total	Fold Enrichment	Bonferroni	Benjamini	FDR
GOTERM_BP_FAT	GO:0031667~response to nutrient levels	57	1.90444	0.000643724	3.7251e+233	2187	166	9658	1.51637	0.943882	0.437892	1.20377
[truncated: 50 more rows]

## Sheet: Huh-7.5.1c2 vs Huh-7.5.1c2i
Annotation Cluster 1	Enrichment Score: 3.3102745047701747
[truncated: 114 more rows]

[truncated: 6 more sheets: cell recep and lipoprots, HRFs, HDFs, interact with HCV protein (1), interact with HCV protein (2), chronic infection]
